# Supplementary material for: Standardizing Proteomics Workflow for Liquid Chromatography-Mass Spectrometry: Technical and Statistical Considerations
Source: PubMed Central journal article supplement (PMC7059694; doi:10.35248/0974-276x.19.12.496), 2019-04-04
Supplement: NIHMS1032169-supplement-Suppl_file_1.pdf [file NIHMS1032169-supplement-Suppl_file_1.pdf]

| Accession | Identified   | Gene.Symt | Molecular | FR_MAX   | FR_MAX   | FR_MAX   | FR_MAX   | FR_MAX   |
|-----------|--------------|-----------|-----------|----------|----------|----------|----------|----------|
|           |              |           |           | FR2.1    | FR5.1    | FR9.1    | FR2.2    | FR5.2    |
| sp P13647 | Keratin, tyř | KRT5      | 62 kDa    | 4.26E+09 | 4.39E+08 | 1.09E+09 | 2.13E+09 | 3.17E+08 |
| sp P35579 | Myosin-9     | MYH9      | 227 kDa   | 5.43E+09 | 8.59E+09 | 6.78E+09 | 2.56E+09 | 4.78E+09 |
| sp O43707 | Alpha-actin  | ACTN4     | 105 kDa   | 7.88E+09 | 1.04E+10 | 8.92E+09 | 3.32E+09 | 6.86E+09 |
| sp P98160 | Basement r   | HSPG2     | 469 kDa   | 2.64E+09 | 4.39E+09 | 2.87E+09 | 1.05E+09 | 2.21E+09 |
| sp P12111 | Isoform 2 c  | COL6A3    | 321 kDa   | 3.70E+09 | 5.60E+09 | 4.39E+09 | 1.81E+09 | 3.09E+09 |
| sp P35527 | Keratin, tyř | KRT9      | 62 kDa    | 1.67E+09 | 9.92E+08 | 3.04E+08 | 7.88E+08 | 4.61E+08 |
| sp P04264 | Keratin, tyř | KRT1      | 66 kDa    | 4.16E+09 | 1.15E+09 | 1.15E+09 | 1.72E+09 | 6.01E+08 |
| sp P08670 | Vimentin     | VIM       | 54 kDa    | 7.56E+09 | 1.24E+10 | 9.09E+09 | 3.48E+09 | 7.12E+09 |
| sp O15230 | Laminin sul  | LAMA5     | 400 kDa   | 2.11E+09 | 3.45E+09 | 2.64E+09 | 1.02E+09 | 1.93E+09 |
| sp Q9Y490 | Talin-1      | TLN1      | 270 kDa   | 1.63E+09 | 2.55E+09 | 1.93E+09 | 8.46E+08 | 1.44E+09 |
| sp P55268 | Laminin sul  | LAMB2     | 196 kDa   | 2.73E+09 | 4.08E+09 | 3.26E+09 | 1.25E+09 | 2.45E+09 |
| sp P13645 | Keratin, tyř | KRT10     | 59 kDa    | 4.21E+09 | 2.59E+08 | 1.30E+09 | 2.32E+09 | 2.24E+08 |
| sp O00468 | Isoform 6 c  | AGRN      | 215 kDa   | 2.26E+09 | 3.46E+09 | 2.77E+09 | 9.13E+08 | 1.90E+09 |
| sp P11047 | Laminin sul  | LAMC1     | 178 kDa   | 1.94E+09 | 2.98E+09 | 2.46E+09 | 7.27E+08 | 1.38E+09 |
| sp P35555 | Fibrillin-1  | FBN1      | 312 kDa   | 2.03E+09 | 3.24E+09 | 2.42E+09 | 7.54E+08 | 1.42E+09 |
| sp Q09666 | Neuroblast   | AHNAK     | 629 kDa   | 1.04E+09 | 1.81E+09 | 1.29E+09 | 4.85E+08 | 1.19E+09 |
| sp Q13813 | Isoform 3 c  | SPTAN1    | 282 kDa   | 6.19E+08 | 1.14E+09 | 8.01E+08 | 2.60E+08 | 6.27E+08 |
| sp P07437 | Tubulin bet  | TUBB      | 50 kDa    | 2.22E+09 | 2.83E+09 | 2.51E+09 | 1.10E+09 | 1.87E+09 |
| sp Q15149 | Plectin      | PLEC      | 532 kDa   | 3.68E+08 | 7.42E+08 | 5.44E+08 | 2.00E+08 | 4.20E+08 |
| sp P48681 | Nestin       | NES       | 177 kDa   | 7.84E+08 | 1.39E+09 | 1.10E+09 | 4.30E+08 | 9.12E+08 |
| sp P18206 | Isoform 1 c  | VCL       | 117 kDa   | 1.18E+09 | 1.82E+09 | 1.40E+09 | 5.20E+08 | 1.06E+09 |
| sp P14543 | Nidogen-1    | NID1      | 136 kDa   | 1.76E+09 | 2.93E+09 | 1.84E+09 | 7.24E+08 | 1.46E+09 |
| sp P02751 | Isoform 14   | FN1       | 249 kDa   | 7.09E+08 | 1.09E+09 | 8.16E+08 | 3.33E+08 | 6.05E+08 |
| sp P02675 | Fibrinogen   | FGB       | 56 kDa    | 2.14E+09 | 2.19E+09 | 1.32E+09 | 9.57E+08 | 1.10E+09 |
| sp P08572 | Collagen al  | COL4A2    | 168 kDa   | 1.79E+09 | 3.87E+09 | 2.70E+09 | 1.01E+09 | 1.59E+09 |
| sp P67936 | Tropomyos    | TPM4      | 29 kDa    | 1.16E+09 | 1.67E+09 | 1.38E+09 | 4.32E+08 | 8.58E+08 |
| sp Q01082 | Spectrin be  | SPTBN1    | 275 kDa   | 5.02E+08 | 8.11E+08 | 6.07E+08 | 2.00E+08 | 4.83E+08 |
| sp Q01955 | Collagen al  | COL4A3    | 162 kDa   | 1.96E+09 | 2.75E+09 | 2.04E+09 | 7.21E+08 | 1.39E+09 |
| sp P02545 | Prelamin-A   | LMNA      | 74 kDa    | 1.22E+09 | 1.98E+09 | 1.52E+09 | 4.98E+08 | 1.08E+09 |
| sp P53420 | Collagen al  | COL4A4    | 164 kDa   | 2.34E+09 | 3.23E+09 | 2.48E+09 | 5.61E+08 | 1.29E+09 |
| sp P02768 | Serum albu   | ALB       | 69 kDa    | 6.12E+08 | 1.02E+09 | 6.74E+08 | 2.68E+08 | 5.44E+08 |
| sp P02462 | Collagen al  | COL4A1    | 161 kDa   | 1.65E+09 | 2.71E+09 | 2.22E+09 | 7.11E+08 | 1.38E+09 |
| sp P07355 | Isoform 2 c  | ANXA2     | 40 kDa    | 1.32E+09 | 2.16E+09 | 1.55E+09 | 6.52E+08 | 1.19E+09 |
| sp P12110 | Collagen al  | COL6A2    | 109 kDa   | 5.04E+08 | 1.11E+09 | 8.88E+08 | 3.18E+08 | 6.17E+08 |
| sp P04406 | Glyceralde   | GAPDH     | 36 kDa    | 9.49E+08 | 1.29E+09 | 9.19E+08 | 2.89E+08 | 8.45E+08 |
| sp P08473 | Neprilysin   | MME       | 86 kDa    | 4.61E+08 | 6.97E+08 | 5.82E+08 | 1.85E+08 | 3.71E+08 |
| sp P01892 | HLA class I  | HLA-A     | 41 kDa    | 5.15E+08 | 7.84E+08 | 5.16E+08 | 1.82E+08 | 4.40E+08 |
| sp P02679 | Isoform Ga   | FGG       | 49 kDa    | 1.38E+09 | 1.54E+09 | 9.63E+08 | 6.31E+08 | 7.96E+08 |
| sp Q8N3V7 | Isoform 2 c  | SYNPO     | 96 kDa    | 6.77E+08 | 9.86E+08 | 7.62E+08 | 3.44E+08 | 6.09E+08 |
| sp P07900 | Isoform 2 c  | HSP90AA1  | 98 kDa    | 8.14E+08 | 1.17E+09 | 8.60E+08 | 2.43E+08 | 5.26E+08 |
| sp Q13576 | Ras GTPase   | IQGAP2    | 181 kDa   | 2.28E+08 | 4.60E+08 | 3.05E+08 | 1.13E+08 | 2.55E+08 |
| sp P22314 | Ubiquitin-li | UBA1      | 118 kDa   | 2.67E+08 | 4.13E+08 | 3.11E+08 | 1.67E+08 | 2.61E+08 |
| sp P06576 | ATP syntha   | ATP5B     | 57 kDa    | 4.78E+08 | 6.77E+08 | 4.31E+08 | 2.13E+08 | 4.22E+08 |
| sp P02461 | Collagen al  | COL3A1    | 139 kDa   | 2.17E+08 | 1.04E+09 | 4.58E+08 | 51400000 | 1.60E+08 |
| sp P08107 | Heat shock   | HSPA1A    | 70 kDa    | 7.31E+08 | 1.12E+09 | 8.34E+08 | 2.93E+08 | 6.08E+08 |

|                                |         |          |          |          |          |          |
|--------------------------------|---------|----------|----------|----------|----------|----------|
| sp P15924 Desmoplak DSP        | 332 kDa | 2751400  | 11100000 | 0        | 1579500  | 0        |
| sp P11021 78 kDa gluc HSPA5    | 72 kDa  | 3.97E+08 | 6.06E+08 | 3.99E+08 | 2.09E+08 | 3.96E+08 |
| sp P54652 Heat shock HSPA2     | 70 kDa  | 6.88E+08 | 1.03E+09 | 6.71E+08 | 2.54E+08 | 6.24E+08 |
| sp Q96JY6-Isoform 5 c PDLIM2   | 63 kDa  | 9.85E+08 | 1.47E+09 | 1.09E+09 | 4.27E+08 | 7.99E+08 |
| sp P07195 L-lactate de LDHB    | 37 kDa  | 3.44E+08 | 5.20E+08 | 3.90E+08 | 2.34E+08 | 3.88E+08 |
| sp P55072 Transitiona VCP      | 89 kDa  | 1.41E+08 | 2.12E+08 | 1.62E+08 | 75900000 | 1.24E+08 |
| sp P00558 Phosphogly PGK1      | 45 kDa  | 1.98E+08 | 2.81E+08 | 1.46E+08 | 1.14E+08 | 2.17E+08 |
| sp ANXA5_sp ANXA5_ ANXA5       | 36 kDa  | 3.30E+08 | 4.95E+08 | 3.85E+08 | 1.57E+08 | 3.07E+08 |
| sp P05556 Integrin be ITGB1    | 88 kDa  | 4.44E+08 | 6.03E+08 | 5.40E+08 | 1.66E+08 | 3.30E+08 |
| sp Q9GZM Tubulointe TINAGL1    | 52 kDa  | 2.48E+08 | 3.30E+08 | 2.91E+08 | 1.13E+08 | 1.75E+08 |
| sp P02452 Collagen al COL1A1   | 139 kDa | 40300000 | 3.08E+08 | 91200000 | 7580100  | 9.20E+07 |
| sp P26038 Moesin MSN           | 68 kDa  | 4.11E+08 | 6.30E+08 | 4.18E+08 | 2.08E+08 | 3.66E+08 |
| sp P24844 Myosin reg MYL9      | 20 kDa  | 2.92E+08 | 4.63E+08 | 2.45E+08 | 1.27E+08 | 2.00E+08 |
| sp P06733 Alpha-enol ENO1      | 47 kDa  | 5.60E+07 | 54900000 | 73300000 | 38200000 | 53300000 |
| sp P62805 Histone H4 HIST1H4A  | 11 kDa  | 1.31E+09 | 2.19E+09 | 1.73E+09 | 7.92E+08 | 1.91E+09 |
| sp P21980 Protein-glu TGM2     | 77 kDa  | 2.65E+08 | 3.47E+08 | 2.51E+08 | 1.17E+08 | 2.12E+08 |
| sp P08133 Annexin A6 ANXA6     | 76 kDa  | 1.28E+08 | 1.55E+08 | 1.55E+08 | 59100000 | 1.27E+08 |
| sp P30101 Protein disi PDIA3   | 57 kDa  | 3.49E+08 | 5.62E+08 | 3.91E+08 | 1.47E+08 | 3.21E+08 |
| sp Q14204 Cytoplasmic DYNC1H1  | 532 kDa | 48800000 | 93300000 | 72100000 | 28800000 | 80300000 |
| sp P14625 Endoplasm HSP90B1    | 92 kDa  | 3.26E+08 | 4.47E+08 | 3.43E+08 | 1.27E+08 | 2.61E+08 |
| sp P04792 Heat shock HSPB1     | 23 kDa  | 3.06E+08 | 5.11E+08 | 4.22E+08 | 1.74E+08 | 3.11E+08 |
| sp P04083 Annexin A1 ANXA1     | 39 kDa  | 2.62E+08 | 3.90E+08 | 3.23E+08 | 1.17E+08 | 2.33E+08 |
| sp P25705 ATP syntha ATP5A1    | 60 kDa  | 3.32E+08 | 4.65E+08 | 3.27E+08 | 1.57E+08 | 3.01E+08 |
| sp P62158 Calmodulin CALM1     | 17 kDa  | 2.30E+08 | 2.68E+08 | 2.83E+08 | 94800000 | 1.31E+08 |
| sp Q96HC4 PDZ and LIF PDLIM5   | 64 kDa  | 2.48E+08 | 4.42E+08 | 3.29E+08 | 91200000 | 2.38E+08 |
| sp Q02413 Desmoglein DSG1      | 114 kDa | 16700000 | 0        | 0        | 3636200  | 0        |
| sp P0C0S8 Histone H2 HIST1H2AG | 14 kDa  | 9.89E+08 | 1.34E+09 | 8.72E+08 | 5.48E+08 | 9.88E+08 |
| sp P05062 Fructose-bi ALDOB    | 39 kDa  | 5.66E+08 | 4.41E+08 | 4.93E+08 | 2.17E+08 | 2.60E+08 |
| sp Q16555 Dihydropyry DPYSL2   | 62 kDa  | 2.27E+08 | 3.72E+08 | 2.35E+08 | 1.09E+08 | 2.19E+08 |
| sp P37802-Isoform 2 c TAGLN2   | 24 kDa  | 1.93E+08 | 3.27E+08 | 2.56E+08 | 1.01E+08 | 2.04E+08 |
| sp Q86YZ3 Hornerin HRNR        | 282 kDa | 4127100  | 0        | 0        | 0        | 0        |
| sp P10809 60 kDa hea HSPD1     | 61 kDa  | 1.72E+08 | 2.08E+08 | 1.80E+08 | 79100000 | 1.29E+08 |
| sp Q96A08 Histone H2 HIST1H2BA | 14 kDa  | 3.16E+08 | 6.77E+08 | 5.42E+08 | 1.95E+08 | 1.93E+08 |
| sp P22626 Heterogen HNRNPA2B   | 37 kDa  | 1.93E+08 | 3.26E+08 | 2.65E+08 | 95200000 | 1.61E+08 |
| sp P17655 Calpain-2 c CAPN2    | 80 kDa  | 50500000 | 1.83E+08 | 1.47E+08 | 36200000 | 82100000 |
| sp P50895 Basal cell a BCAM    | 67 kDa  | 1.84E+08 | 3.13E+08 | 2.30E+08 | 85700000 | 1.20E+08 |
| sp P01024 Compleme C3          | 187 kDa | 1.16E+08 | 2.43E+08 | 1.29E+08 | 36300000 | 6.40E+07 |
| sp P50440-Isoform 2 c GATM     | 45 kDa  | 3.20E+08 | 2.83E+08 | 3.48E+08 | 1.45E+08 | 1.44E+08 |
| sp P63104 14-3-3 prot YWHAZ    | 28 kDa  | 2.57E+08 | 3.46E+08 | 4.46E+08 | 1.50E+08 | 2.98E+08 |
| sp P61106 Ras-related RAB14    | 24 kDa  | 83500000 | 1.20E+08 | 1.07E+08 | 48900000 | 99400000 |
| sp Q07075 Glutamyl ai ENPEP    | 109 kDa | 1.00E+08 | 1.46E+08 | 91700000 | 32700000 | 9.60E+07 |
| sp P13639 Elongation EEF2      | 95 kDa  | 7.80E+07 | 97600000 | 73500000 | 41100000 | 7.80E+07 |
| sp P62258 14-3-3 prot YWHAE    | 29 kDa  | 80400000 | 1.15E+08 | 1.95E+08 | 8.70E+07 | 1.89E+08 |
| sp Q96KP4 Cytosolic n CNDP2    | 53 kDa  | 1.06E+08 | 1.58E+08 | 59900000 | 69800000 | 84900000 |
| sp P04004 Vitronectin VTN      | 54 kDa  | 2.11E+08 | 3.50E+08 | 2.78E+08 | 92500000 | 1.77E+08 |
| sp P07339 Cathepsin I CTSD     | 45 kDa  | 2.60E+07 | 40300000 | 32100000 | 17700000 | 28200000 |
| tr E7EVA0 Microtubul MAP4      | 245 kDa | 39900000 | 1.17E+08 | 63400000 | 23100000 | 45100000 |

|                     |                    |         |          |          |          |          |          |
|---------------------|--------------------|---------|----------|----------|----------|----------|----------|
| sp Q01995           | Transgelin TAGLN   | 23 kDa  | 1.55E+08 | 2.61E+08 | 2.18E+08 | 6.90E+07 | 1.80E+08 |
| sp P00966           | Argininosu ASS1    | 47 kDa  | 1.63E+08 | 1.54E+08 | 1.54E+08 | 85500000 | 96900000 |
| sp P30041           | Peroxiredo PRDX6   | 25 kDa  | 1.84E+08 | 2.21E+08 | 1.63E+08 | 74900000 | 1.62E+08 |
| sp P07237           | Protein dis P4HB   | 57 kDa  | 8.60E+07 | 1.68E+08 | 1.25E+08 | 54300000 | 1.03E+08 |
| sp P27797           | Calreticulin CALR  | 48 kDa  | 3.10E+08 | 4.80E+08 | 3.13E+08 | 99100000 | 2.02E+08 |
| sp P61978           | Isoform 2 c HNRNPK | 51 kDa  | 1.08E+08 | 1.64E+08 | 1.38E+08 | 57300000 | 1.19E+08 |
| sp P13489           | Ribonuclea RNH1    | 50 kDa  | 70200000 | 91300000 | 83200000 | 28200000 | 44800000 |
| sp P62937           | Peptidyl-pr PPIA   | 18 kDa  | 9.00E+07 | 1.01E+08 | 52200000 | 4.80E+07 | 81900000 |
| sp P46940           | Ras GTPase IQGAP1  | 189 kDa | 82900000 | 1.07E+08 | 95700000 | 4.30E+07 | 69400000 |
| sp P08123           | Collagen al COL1A2 | 129 kDa | 2.80E+07 | 5.06E+08 | 68400000 | 22600000 | 1.83E+08 |
| sp P62979           | Ubiquitin-4 RPS27A | 18 kDa  | 3.34E+08 | 5.20E+08 | 4.84E+08 | 1.72E+08 | 3.40E+08 |
| sp P0COL4           | Isoform 2 c C4A    | 188 kDa | 1.41E+08 | 1.61E+08 | 1.46E+08 | 57500000 | 99100000 |
| sp GSTP1_ sp GSTP1_ | GSTP1              | 23 kDa  | 1.29E+08 | 1.70E+08 | 71500000 | 63500000 | 90100000 |
| sp P24821           | Isoform 4 c TNC    | 231 kDa | 55900000 | 73400000 | 34200000 | 24900000 | 3.50E+07 |
| sp P60174           | Isoform 2 c TPI1   | 27 kDa  | 1.20E+07 | 2.00E+07 | 6496500  | 10200000 | 6826600  |
| sp O00592           | Isoform 2 c PODXL  | 55 kDa  | 3.73E+08 | 5.82E+08 | 4.14E+08 | 1.14E+08 | 2.19E+08 |
| sp P06702           | Protein S1C S100A9 | 13 kDa  | 15300000 | 14100000 | 16700000 | 476620   | 5133200  |
| sp P02792           | Ferritin ligh FTL  | 20 kDa  | 67800000 | 1.07E+08 | 59200000 | 41400000 | 59500000 |
| sp Q15019           | Isoform 2 c 2-Sep  | 45 kDa  | 63700000 | 1.26E+08 | 76400000 | 35100000 | 73100000 |
| sp P30086           | Phosphatid PEBP1   | 21 kDa  | 20600000 | 38400000 | 46100000 | 5554200  | 7728200  |
| sp Q5D862           | Filaggrin-2 FLG2   | 248 kDa | 8953300  | 0        | 0        | 4567000  | 0        |
| sp Q08554           | Isoform 1B DSC1    | 94 kDa  | 0        | 0        | 0        | 0        | 0        |
| sp Q63HR2           | Isoform 4 c TENC1  | 154 kDa | 1.18E+08 | 1.54E+08 | 1.14E+08 | 29300000 | 81300000 |
| sp Q9NZA1           | Isoform 1 c CLIC5  | 28 kDa  | 1.64E+08 | 2.80E+08 | 1.81E+08 | 95500000 | 1.27E+08 |
| sp O00299           | Chloride in CLIC1  | 27 kDa  | 1.25E+08 | 1.95E+08 | 1.47E+08 | 8.90E+07 | 1.44E+08 |
| sp Q8WX9            | Palladin PALLD     | 151 kDa | 77200000 | 1.21E+08 | 1.01E+08 | 26800000 | 63900000 |
| sp P21291           | Cysteine ar CSRP1  | 21 kDa  | 2.90E+08 | 4.03E+08 | 3.13E+08 | 1.11E+08 | 2.48E+08 |
| sp P07737           | Profilin-1 PFN1    | 15 kDa  | 1.99E+08 | 4.26E+08 | 3.25E+08 | 1.27E+08 | 1.90E+08 |
| sp Q15365           | Poly(rC)-bir PCBP1 | 37 kDa  | 78700000 | 1.15E+08 | 94800000 | 26800000 | 63400000 |
| sp O15231           | Isoform 3 c ZNF185 | 74 kDa  | 66800000 | 1.06E+08 | 1.01E+08 | 21500000 | 40100000 |
| sp Q6UXI9           | Isoform 6 c NPNT   | 64 kDa  | 99400000 | 2.41E+08 | 1.72E+08 | 55400000 | 1.53E+08 |
| sp Q13418           | Integrin-lin ILK   | 51 kDa  | 58500000 | 1.16E+08 | 98600000 | 38400000 | 86100000 |
| sp O75083           | WD repeat WDR1     | 66 kDa  | 53400000 | 1.11E+08 | 59100000 | 32900000 | 74200000 |
| sp P56199           | Integrin al ITGA1  | 131 kDa | 40500000 | 67900000 | 25500000 | 24200000 | 56900000 |
| sp P61158           | Actin-relate ACTR3 | 47 kDa  | 81400000 | 2.21E+08 | 1.19E+08 | 35800000 | 85700000 |
| sp P23381           | Tryptophar WARS    | 53 kDa  | 64800000 | 1.14E+08 | 91600000 | 23200000 | 72100000 |
| sp P29401           | Isoform 2 c TKT    | 69 kDa  | 66800000 | 54200000 | 81600000 | 21700000 | 58900000 |
| sp Q15582           | Transformi TGFBI   | 75 kDa  | 44600000 | 76500000 | 49800000 | 24200000 | 51500000 |
| sp P27824           | Isoform 2 c CANX   | 72 kDa  | 1.15E+08 | 1.92E+08 | 1.53E+08 | 38100000 | 8.60E+07 |
| sp HBA_HL sp HBA_HL | HBA                | 15 kDa  | 1.65E+08 | 2.70E+08 | 1.83E+08 | 93800000 | 1.78E+08 |
| sp P02748           | Compleme C9        | 63 kDa  | 1.12E+08 | 1.81E+08 | 1.38E+08 | 25200000 | 46500000 |
| sp P02788           | Lactotransf LTF    | 78 kDa  | 0        | 0        | 0        | 0        | 0        |
| sp P14923           | Junction pl JUP    | 82 kDa  | 3920200  | 0        | 0        | 1339300  | 0        |
| sp P26006           | Integrin al ITGA3  | 117 kDa | 59600000 | 82700000 | 48600000 | 20100000 | 5.30E+07 |
| sp P38646           | Stress-70 p HSPA9  | 74 kDa  | 70800000 | 83800000 | 67300000 | 2.30E+07 | 27200000 |
| sp Q14764           | Major vault MVP    | 99 kDa  | 36700000 | 23900000 | 41500000 | 19300000 | 4.90E+07 |
| tr Q5JW85           | Glutathioni GSTA3  | 20 kDa  | 85500000 | 1.02E+08 | 1.06E+08 | 65900000 | 47800000 |

|                                 |         |          |          |          |          |          |
|---------------------------------|---------|----------|----------|----------|----------|----------|
| sp P05091 Aldehyde d ALDH2      | 56 kDa  | 96600000 | 66700000 | 76700000 | 5.70E+07 | 59300000 |
| sp P04275 von Willebr VWF       | 309 kDa | 22300000 | 30800000 | 42500000 | 4325600  | 12900000 |
| sp P21399 Cytoplasmic ACO1      | 98 kDa  | 26900000 | 23600000 | 23600000 | 14200000 | 9930200  |
| sp Q03154 Aminoacyl ACY1        | 46 kDa  | 2.30E+07 | 24700000 | 3643400  | 15700000 | 13600000 |
| sp P02760 Protein AM AMBP       | 39 kDa  | 68100000 | 84700000 | 1.02E+08 | 26300000 | 1.01E+08 |
| sp P40939 Trifunction HADHA     | 83 kDa  | 17100000 | 62500000 | 32700000 | 10900000 | 39400000 |
| sp P19338 Nucleolin NCL         | 77 kDa  | 63700000 | 1.24E+08 | 68400000 | 24600000 | 7.20E+07 |
| sp P13797 Plastin-3 PLS3        | 71 kDa  | 67200000 | 1.81E+08 | 1.17E+08 | 50800000 | 1.14E+08 |
| sp Q16822 Phosphoen PCK2        | 71 kDa  | 1.17E+08 | 77200000 | 8.50E+07 | 57100000 | 43500000 |
| sp Q93088 Betaine-hc BHMT       | 45 kDa  | 1.54E+08 | 1.36E+08 | 82400000 | 43300000 | 74900000 |
| sp P16402 Histone H1 HIST1H1D   | 22 kDa  | 1.21E+08 | 88200000 | 64900000 | 5.50E+07 | 70800000 |
| sp P14550 Alcohol deh AKR1A1    | 37 kDa  | 1.32E+08 | 1.23E+08 | 84200000 | 74100000 | 54600000 |
| sp P01876 Ig alpha-1 c IGHA1    | 38 kDa  | 24100000 | 11800000 | 2.40E+07 | 11900000 | 37600000 |
| sp Q06830 Peroxiredo PRDX1      | 22 kDa  | 1.14E+08 | 1.19E+08 | 70900000 | 5.20E+07 | 67400000 |
| sp P26599 Polypyrimic PTBP1     | 57 kDa  | 34100000 | 43800000 | 36400000 | 25100000 | 31100000 |
| sp Q16658 Fascin FSCN1          | 55 kDa  | 3.80E+07 | 61600000 | 54500000 | 2.20E+07 | 5.10E+07 |
| sp P00367 Glutamate GLUD1       | 61 kDa  | 1.30E+08 | 1.32E+08 | 1.59E+08 | 55900000 | 81900000 |
| sp P30038 Delta-1-pyr ALDH4A1   | 62 kDa  | 1.85E+08 | 1.43E+08 | 1.68E+08 | 9.50E+07 | 3.60E+07 |
| sp Q16181 Isoform 2 c 7-Sep     | 51 kDa  | 67500000 | 94500000 | 60900000 | 29700000 | 8.70E+07 |
| sp P17927 Compleme CR1          | 224 kDa | 37100000 | 51200000 | 39500000 | 14100000 | 39800000 |
| sp P23246 Splicing fac SFPQ     | 76 kDa  | 30500000 | 49700000 | 35900000 | 11900000 | 33100000 |
| sp P35241 Radixin RDX           | 69 kDa  | 1.94E+08 | 3.07E+08 | 2.05E+08 | 98400000 | 1.72E+08 |
| sp P24752 Acetyl-CoA ACAT1      | 45 kDa  | 86900000 | 75900000 | 95200000 | 43900000 | 47800000 |
| sp Q01518 Adenylyl cy CAP1      | 52 kDa  | 54600000 | 1.02E+08 | 35900000 | 33300000 | 71600000 |
| sp Q02388 Collagen al COL7A1    | 295 kDa | 0        | 0        | 0        | 0        | 0        |
| sp Q8N1N Keratin, tyf KRT78     | 57 kDa  | 2120600  | 0        | 0        | 0        | 0        |
| sp P62879 Guanine nu GNB2       | 37 kDa  | 18200000 | 44800000 | 38700000 | 7721100  | 26500000 |
| sp P42224 Signal trans STAT1    | 87 kDa  | 30100000 | 80200000 | 51100000 | 11600000 | 3.20E+07 |
| sp O43795 Isoform 2 c MYO1B     | 125 kDa | 39400000 | 5.00E+07 | 4.00E+07 | 21600000 | 32900000 |
| sp Q08AH Acyl-coenz ACSM2A      | 64 kDa  | 66100000 | 49300000 | 48300000 | 46500000 | 22900000 |
| sp P18669 Phosphogly PGAM1      | 29 kDa  | 37500000 | 22800000 | 0        | 13200000 | 12700000 |
| sp P13760 HLA class II HLA-DRB1 | 30 kDa  | 65600000 | 1.30E+08 | 72200000 | 25800000 | 7.30E+07 |
| sp Q6PCBC von Willebr VWA1      | 47 kDa  | 3.40E+07 | 27800000 | 39900000 | 12500000 | 26400000 |
| sp Q99497 Protein deg PARK7     | 20 kDa  | 69400000 | 1.35E+08 | 17600000 | 12900000 | 24900000 |
| sp P02511 Alpha-cryst CRYAB     | 20 kDa  | 24200000 | 4.30E+07 | 3.40E+07 | 27400000 | 34700000 |
| sp Q5IJ48 Protein cru CRB2      | 134 kDa | 14800000 | 34400000 | 22100000 | 10100000 | 13700000 |
| sp O15144 Actin-relate ARPC2    | 34 kDa  | 29600000 | 3.90E+07 | 33600000 | 13400000 | 35600000 |
| sp P30084 Enoyl-CoA ECHS1       | 31 kDa  | 5.40E+07 | 42900000 | 28100000 | 32300000 | 27700000 |
| sp Q93052 Lipoma-pre LPP        | 66 kDa  | 72800000 | 84200000 | 84600000 | 8212100  | 54300000 |
| tr J3KNQ4 Alpha-parv PARVA      | 47 kDa  | 51600000 | 89500000 | 49100000 | 29400000 | 26400000 |
| sp Q9NQC Reticulon-4 RTN4       | 130 kDa | 1.01E+08 | 1.62E+08 | 63200000 | 47500000 | 6.40E+07 |
| sp O43301 Heat shock HSPA12A    | 75 kDa  | 18300000 | 35300000 | 48300000 | 11700000 | 23800000 |
| sp Q9NVA Isoform 2 c 11-Sep     | 51 kDa  | 64800000 | 1.05E+08 | 72600000 | 24300000 | 18700000 |
| tr Q5TEC6 Histone clu HIST2H3PS | 15 kDa  | 2.12E+08 | 2.35E+08 | 2.00E+08 | 1.10E+08 | 1.56E+08 |
| sp P05109 Protein S1C S100A8    | 11 kDa  | 25400000 | 21600000 | 26600000 | 8628100  | 9894600  |
| sp P61586 Transformi RHOA       | 22 kDa  | 53700000 | 75700000 | 39300000 | 25300000 | 34900000 |
| sp P42765 3-ketoacyl- ACAA2     | 42 kDa  | 74400000 | 59300000 | 71500000 | 28400000 | 37900000 |

|                                        |          |          |          |          |          |          |
|----------------------------------------|----------|----------|----------|----------|----------|----------|
| sp Q00577 Transcriptin PURA            | 35 kDa   | 35100000 | 56500000 | 48800000 | 22400000 | 41100000 |
| sp Q92597 Protein ND NDRG1             | 43 kDa   | 55800000 | 95800000 | 45800000 | 31400000 | 45300000 |
| sp Q15417 Calponin-3 CNN3              | 36 kDa   | 51600000 | 1.01E+08 | 70800000 | 20100000 | 37700000 |
| sp Q5T749 Keratinocyt KPRP             | 64 kDa   | 8564400  | 0        | 0        | 1789200  | 0        |
| sp P28838 Isoform 2 c LAP3             | 53 kDa   | 5206200  | 12300000 | 8581500  | 11500000 | 18900000 |
| sp P02649 Apolipoprotein APOE          | 36 kDa   | 33300000 | 48100000 | 44700000 | 6989500  | 36300000 |
| sp P46939 Isoform 2 c UTRN             | 395 kDa  | 3747500  | 10800000 | 4542900  | 3128800  | 6484000  |
| sp Q14195 Isoform LC1 DPYSL3           | 74 kDa   | 68600000 | 1.10E+08 | 87600000 | 34800000 | 94600000 |
| sp P61160 Actin-related ACTR2          | 45 kDa   | 4.50E+07 | 67700000 | 55400000 | 17700000 | 34500000 |
| sp P12956 X-ray repair XRCC6           | 70 kDa   | 35400000 | 49300000 | 33800000 | 7747800  | 25600000 |
| sp Q9BSJ8 Isoform 2 c ESYT1            | 124 kDa  | 19300000 | 21500000 | 28700000 | 9701800  | 16700000 |
| sp P60953 Cell division CDC42          | 21 kDa   | 45800000 | 68200000 | 41500000 | 20900000 | 28300000 |
| sp P31944 Caspase-14 CASP14            | 28 kDa   | 0        | 0        | 0        | 0        | 0        |
| sp P02743 Serum amyloid APCS           | 25 kDa   | 63700000 | 1.33E+08 | 68800000 | 29300000 | 77300000 |
| sp P40925 Isoform 3 c MDH1             | 39 kDa   | 1.35E+08 | 1.45E+08 | 1.10E+08 | 7.10E+07 | 96600000 |
| sp P78371 T-complex CCT2               | 57 kDa   | 10200000 | 1.60E+07 | 19200000 | 1.00E+07 | 18300000 |
| sp P55795 Heterogeneous HNRNPH2        | 49 kDa   | 22400000 | 41300000 | 23500000 | 3085900  | 8659400  |
| sp Q96J84 Kinase of IRRE KIRREL        | 84 kDa   | 13400000 | 39100000 | 33200000 | 11100000 | 12100000 |
| sp Q15942 Zyxin ZYX                    | 61 kDa   | 1.04E+08 | 1.77E+08 | 95100000 | 28700000 | 28600000 |
| sp Q9H223 EH domain EHD4               | 61 kDa   | 6.20E+07 | 1.05E+08 | 81700000 | 27100000 | 8.60E+07 |
| sp O14745 Na(+)/H(+) SLC9A3R1          | 39 kDa   | 5.70E+07 | 88100000 | 64400000 | 21300000 | 38600000 |
| sp P61981 14-3-3 protein YWHAG         | 28 kDa   | 1.04E+08 | 1.62E+08 | 1.97E+08 | 78400000 | 1.57E+08 |
| sp Q7Z794 Keratin, type KRT77          | 62 kDa   | 5.45E+08 | 1.78E+08 | 2.28E+08 | 2.73E+08 | 1.14E+08 |
| sp P09382 Galectin-1 LGALS1            | 15 kDa   | 8812700  | 0        | 0        | 3314300  | 0        |
| tr F8W6I7 Heterogeneous HNRNPA1        | 33 kDa   | 42300000 | 74600000 | 55900000 | 15700000 | 37800000 |
| sp O00151 PDZ and LIM domain PDLIM1    | 36 kDa   | 30200000 | 59600000 | 3.70E+07 | 15700000 | 26200000 |
| sp P01009 Alpha-1-antitrypsin SERPINA1 | 47 kDa   | 1.10E+07 | 12200000 | 19700000 | 1.00E+07 | 22900000 |
| sp P12277 Creatine kinase CKB          | 43 kDa   | 31800000 | 60400000 | 37300000 | 20800000 | 37700000 |
| sp Q07065 Cytoskeleton CKAP4           | 66 kDa   | 1.70E+07 | 25200000 | 11500000 | 2642100  | 12300000 |
| sp Q8NFW Isoform 2 c COL22A1           | 159 kDa  | 0        | 0        | 0        | 0        | 0        |
| sp Q9Y6C2 EMILIN-1 EMILIN1             | 107 kDa  | 22700000 | 28700000 | 19100000 | 6213700  | 17500000 |
| sp P27105 Erythrocyte STOM             | 32 kDa   | 21600000 | 4.10E+07 | 16400000 | 17700000 | 39200000 |
| sp Q8WXI7 Mucin-16 MUC16               | 2353 kDa | 0        | 0        | 0        | 0        | 0        |
| sp E9PAV3 Nascent polypeptide NACA     | 205 kDa  | 0        | 7671800  | 3344000  | 0        | 0        |
| sp Q14847 LIM and SH2 domain LASP1     | 30 kDa   | 45700000 | 58200000 | 49700000 | 22800000 | 32400000 |
| sp P10301 Ras-related RAS              | 23 kDa   | 25900000 | 87200000 | 68200000 | 9258100  | 42400000 |
| sp P52209 Isoform 2 c PGD              | 52 kDa   | 4.10E+07 | 60700000 | 23600000 | 15500000 | 4.60E+07 |
| sp P61626 Lysozyme C LYZ               | 17 kDa   | 13400000 | 5423600  | 0        | 9167300  | 6007000  |
| sp P06744 Glucose-6-phosphate GPI      | 63 kDa   | 27800000 | 30600000 | 2.60E+07 | 10700000 | 16400000 |
| sp Q01469 Fatty acid-binding FABP5     | 15 kDa   | 17700000 | 3464500  | 14600000 | 0        | 0        |
| sp P27348 14-3-3 protein YWHAQ         | 28 kDa   | 44100000 | 72900000 | 1.31E+08 | 50300000 | 1.07E+08 |
| sp P51148 Isoform 2 c RAB5C            | 27 kDa   | 33600000 | 64800000 | 36700000 | 16700000 | 30900000 |
| sp P07910 Isoform C1 HNRNPC            | 32 kDa   | 13600000 | 30600000 | 45700000 | 17600000 | 4.20E+07 |
| sp Q15404 Ras suppressor RSU1          | 32 kDa   | 48200000 | 77800000 | 52700000 | 24500000 | 41500000 |
| sp P25940 Collagen alpha1 COL5A3       | 172 kDa  | 0        | 0        | 0        | 0        | 0        |
| sp Q9NP85 Podocin NPHS2                | 42 kDa   | 13400000 | 7.00E+07 | 43200000 | 41800000 | 81500000 |
| sp Q9NYL9 Tropomodulin TMOD3           | 40 kDa   | 28600000 | 24300000 | 17600000 | 8632300  | 11200000 |

|                                |         |          |          |          |          |          |
|--------------------------------|---------|----------|----------|----------|----------|----------|
| sp Q13492 Isoform 2 c PICALM   | 69 kDa  | 9224800  | 21300000 | 13500000 | 6282300  | 10900000 |
| sp P09525 Annexin A4 ANXA4     | 36 kDa  | 20600000 | 31500000 | 23400000 | 8416500  | 17800000 |
| sp P48735 Isocitrate d IDH2    | 51 kDa  | 52800000 | 45500000 | 52400000 | 25900000 | 33900000 |
| sp O60500 Isoform 2 c NPHS1    | 131 kDa | 13700000 | 15400000 | 10300000 | 0        | 15900000 |
| sp P32119 Peroxiredo PRDX2     | 22 kDa  | 50300000 | 48500000 | 35300000 | 18600000 | 22100000 |
| sp Q99832 T-complex CCT7       | 59 kDa  | 5474400  | 869020   | 9637900  | 1474200  | 9482300  |
| sp Q3LXA3 Bifunctiona DAK      | 59 kDa  | 34800000 | 20700000 | 28300000 | 2.10E+07 | 22700000 |
| sp P25311 Zinc-alpha- AZGP1    | 34 kDa  | 0        | 0        | 0        | 0        | 0        |
| sp P05937 Calbindin CALB1      | 30 kDa  | 79700000 | 36600000 | 5.60E+07 | 2.40E+07 | 29400000 |
| sp P0CG39 POTE ankyr POTEJ     | 117 kDa | 6.01E+09 | 7.51E+09 | 6.71E+09 | 2.92E+09 | 5.84E+09 |
| sp P61163 Alpha-cent ACTR1A    | 43 kDa  | 30400000 | 42800000 | 21100000 | 8688000  | 24400000 |
| sp P17987 T-complex TCP1       | 60 kDa  | 7180100  | 14900000 | 8681100  | 2096900  | 5494400  |
| sp P46821 Microtubul MAP1B     | 271 kDa | 9492500  | 22800000 | 19500000 | 6381600  | 1.80E+07 |
| sp P05362 Intercellula ICAM1   | 58 kDa  | 8330200  | 7293800  | 9223400  | 15200000 | 10300000 |
| sp P35237 Serpin B6 SERPINB6   | 43 kDa  | 28100000 | 44900000 | 22800000 | 11700000 | 50500000 |
| sp O43294 Isoform 2 c TGFB1I1  | 48 kDa  | 23200000 | 31300000 | 27700000 | 10700000 | 21600000 |
| sp P45880 Isoform 2 c VDAC2    | 30 kDa  | 96700000 | 1.58E+08 | 1.27E+08 | 31200000 | 88400000 |
| sp P04843 Dolichyl-dij RPN1    | 69 kDa  | 20700000 | 34300000 | 2.80E+07 | 10700000 | 1.30E+07 |
| sp P31942 Isoform 3 c HNRNPH3  | 32 kDa  | 17900000 | 20900000 | 18700000 | 7762700  | 7572900  |
| sp Q96QK1 Vacuolar pi VPS35    | 92 kDa  | 14900000 | 24100000 | 16300000 | 7866300  | 13800000 |
| sp P26641 Isoform 2 c EEF1G    | 56 kDa  | 25600000 | 41400000 | 21200000 | 4363000  | 24600000 |
| sp O00571 Isoform 2 c DDX3X    | 71 kDa  | 5209800  | 14600000 | 6514900  | 4330500  | 13500000 |
| sp P63010 Isoform 2 c AP2B1    | 106 kDa | 6216600  | 5539100  | 9275800  | 5305100  | 11300000 |
| sp Q02952 A-kinase ar AKAP12   | 191 kDa | 22800000 | 2.80E+07 | 15100000 | 4480900  | 12200000 |
| sp P21281 V-type prot ATP6V1B2 | 57 kDa  | 17200000 | 19100000 | 23200000 | 6424100  | 14400000 |
| sp P52943 Isoform 2 c CRIP2    | 30 kDa  | 1.93E+08 | 2.48E+08 | 42100000 | 76800000 | 1.17E+08 |
| sp Q14697 Neutral alp GANAB    | 107 kDa | 22100000 | 28900000 | 17300000 | 8210700  | 20200000 |
| sp P55327 Isoform 3 c TPD52    | 26 kDa  | 20500000 | 3.20E+07 | 19500000 | 10700000 | 11600000 |
| sp P13796 Plastin-2 LCP1       | 70 kDa  | 14600000 | 47200000 | 40800000 | 21600000 | 45200000 |
| sp P54727 UV excisor RAD23B    | 43 kDa  | 19500000 | 33700000 | 21500000 | 7203800  | 2199200  |
| sp Q14247 Src substra CTTN     | 62 kDa  | 33100000 | 54300000 | 25500000 | 14500000 | 31700000 |
| sp P52758 Ribonuclea HRSP12    | 14 kDa  | 66600000 | 55500000 | 2.90E+07 | 30300000 | 34100000 |
| sp P49773 Histidine tr HINT1   | 14 kDa  | 24500000 | 31300000 | 0        | 3105300  | 19200000 |
| sp Q9UHG Prenylcyste PCYOX1    | 57 kDa  | 1.10E+07 | 17200000 | 11500000 | 755130   | 3971800  |
| sp Q9Y696 Chloride ini CLIC4   | 29 kDa  | 25500000 | 33600000 | 50100000 | 11900000 | 18700000 |
| sp Q02878 60S ribosor RPL6     | 33 kDa  | 23600000 | 39700000 | 28100000 | 4398700  | 6309100  |
| sp P05164 Isoform H1 MPO       | 74 kDa  | 0        | 1473900  | 0        | 0        | 0        |
| sp Q6NVY13-hydroxyis HIBCH     | 43 kDa  | 28800000 | 34200000 | 19400000 | 20300000 | 2.50E+07 |
| sp P33176 Kinesin-1 h KIF5B    | 110 kDa | 20100000 | 35900000 | 34200000 | 9250900  | 14400000 |
| sp P49189 4-trimethyl ALDH9A1  | 54 kDa  | 26400000 | 33400000 | 15600000 | 15700000 | 29100000 |
| sp Q15691 Microtubul MAPRE1    | 30 kDa  | 32600000 | 49600000 | 25500000 | 9243500  | 5480000  |
| sp P49411 Elongation TUFM      | 50 kDa  | 38500000 | 51900000 | 32400000 | 28100000 | 34100000 |
| sp P17174 Aspartate a GOT1     | 46 kDa  | 2375400  | 8842900  | 2286000  | 6861000  | 6291900  |
| sp Q02252 Isoform 2 c ALDH6A1  | 56 kDa  | 67700000 | 62400000 | 32600000 | 39800000 | 15700000 |
| sp Q9UBQ Glyoxylate GRHPR      | 36 kDa  | 30600000 | 49300000 | 25400000 | 16400000 | 25300000 |
| sp P10768 S-formylglu ESD      | 31 kDa  | 11500000 | 37300000 | 5944100  | 8179300  | 11900000 |
| sp P40227 T-complex CCT6A      | 58 kDa  | 17900000 | 28800000 | 21100000 | 9071500  | 21100000 |

|                                |         |          |          |          |          |          |
|--------------------------------|---------|----------|----------|----------|----------|----------|
| sp P18124 60S ribosor RPL7     | 29 kDa  | 29500000 | 42700000 | 32700000 | 13800000 | 34400000 |
| sp P47755 F-actin-cap CAPZA2   | 33 kDa  | 83800000 | 1.42E+08 | 1.07E+08 | 32500000 | 54800000 |
| sp P01903 HLA class II HLA-DRA | 29 kDa  | 29300000 | 2.80E+07 | 3.90E+07 | 9730600  | 12600000 |
| sp P13010 X-ray repai XRCC5    | 83 kDa  | 18800000 | 52700000 | 38300000 | 8456100  | 4810500  |
| sp P30153 Serine/thre PPP2R1A  | 65 kDa  | 25100000 | 39300000 | 32500000 | 13700000 | 29600000 |
| sp Q08188 Protein-glu TGM3     | 77 kDa  | 0        | 0        | 0        | 0        | 0        |
| sp P40926 Malate deh MDH2      | 36 kDa  | 16100000 | 16400000 | 8255200  | 15200000 | 1.70E+07 |
| sp Q8WWI Isoform 2 c LMO7      | 191 kDa | 21300000 | 4.90E+07 | 19200000 | 5694100  | 16100000 |
| sp P21796 Voltage-de VDAC1     | 31 kDa  | 28600000 | 7.90E+07 | 30600000 | 11700000 | 48500000 |
| sp P53708 Integrin alp ITGA8   | 117 kDa | 12200000 | 42200000 | 20700000 | 8103000  | 10100000 |
| sp P81605 Dermcidin DCD        | 11 kDa  | 6313000  | 3498100  | 7906100  | 0        | 0        |
| sp P05106 Integrin be ITGB3    | 87 kDa  | 21500000 | 22500000 | 13600000 | 1516800  | 9539000  |
| sp Q15517 Corneodes CDSN       | 52 kDa  | 0        | 0        | 0        | 0        | 0        |
| sp P14866 Heterogen HNRNPL     | 64 kDa  | 21400000 | 40800000 | 43600000 | 8781900  | 20600000 |
| sp Q7KZF4 Staphyloco SND1      | 102 kDa | 13200000 | 15400000 | 9642200  | 5450500  | 7168800  |
| sp Q96I99 Succinyl-Cc SUCLG2   | 47 kDa  | 45600000 | 22100000 | 29600000 | 19600000 | 18700000 |
| sp Q86UP2 Isoform 2 c KTN1     | 150 kDa | 1770800  | 471750   | 6028100  | 2848600  | 1073400  |
| sp P05388 60S acidic r RPLP0   | 34 kDa  | 16200000 | 25600000 | 17800000 | 17200000 | 13400000 |
| sp P30740 Leukocyte SERPINB1   | 43 kDa  | 21800000 | 31600000 | 12500000 | 2950200  | 17300000 |
| sp Q9NVM Protein eva EVA1B     | 18 kDa  | 13100000 | 10500000 | 12300000 | 6317000  | 3951700  |
| sp Q9Y6NE Sulfide:qui SQRDL    | 50 kDa  | 30500000 | 88100000 | 53100000 | 20800000 | 40600000 |
| sp P38606 Isoform 2 c ATP6V1A  | 65 kDa  | 4326800  | 8043500  | 670180   | 5285800  | 7388100  |
| sp P60981 Destrin DSTN         | 19 kDa  | 34100000 | 74800000 | 38800000 | 11800000 | 35500000 |
| sp P62424 60S ribosor RPL7A    | 30 kDa  | 7419300  | 1.20E+07 | 2.10E+07 | 5303000  | 15700000 |
| sp Q08211 ATP-depen DHX9       | 141 kDa | 2203500  | 9530700  | 3894800  | 1802100  | 5009200  |
| sp P50991 T-complex CCT4       | 58 kDa  | 11600000 | 40300000 | 14200000 | 1.10E+07 | 1.80E+07 |
| sp P04179 Isoform 4 c SOD2     | 20 kDa  | 61800000 | 55600000 | 66700000 | 33400000 | 39800000 |
| sp P35232 Prohibitin PHB       | 30 kDa  | 7931600  | 45600000 | 29700000 | 10500000 | 2.90E+07 |
| sp P61088 Ubiquitin-c UBE2N    | 17 kDa  | 28900000 | 35100000 | 30400000 | 8153700  | 18600000 |
| sp P08311 Cathepsin C CTSG     | 29 kDa  | 0        | 0        | 5054900  | 0        | 0        |
| sp P14174 Macrophag MIF        | 12 kDa  | 2280800  | 2391100  | 5461600  | 3497000  | 4245000  |
| sp P29972 Isoform 2 c AQP1     | 20 kDa  | 1.02E+08 | 1.90E+08 | 1.30E+08 | 4.70E+07 | 84100000 |
| sp Q15836 Vesicle-ass VAMP3    | 11 kDa  | 36100000 | 54100000 | 39900000 | 10800000 | 23500000 |
| sp Q9UHD Isoform 2 c 9-Sep     | 64 kDa  | 44600000 | 37600000 | 3.50E+07 | 11800000 | 18300000 |
| sp P35221 Catenin alp CTNNA1   | 100 kDa | 3444000  | 14200000 | 9712100  | 1916600  | 6080400  |
| sp P59998 Isoform 3 c ARPC4    | 22 kDa  | 15900000 | 15900000 | 18300000 | 15400000 | 41900000 |
| sp P05089 Arginase-1 ARG1      | 35 kDa  | 0        | 0        | 0        | 0        | 0        |
| sp Q9Y4L1 Hypoxia up HYOU1     | 111 kDa | 547830   | 4597400  | 4350000  | 5567600  | 6568700  |
| sp P52907 F-actin-cap CAPZA1   | 33 kDa  | 48900000 | 64800000 | 76100000 | 2.70E+07 | 51700000 |
| sp P35556 Fibrillin-2 FBN2     | 315 kDa | 42400000 | 60800000 | 4.10E+07 | 23500000 | 34900000 |
| sp Q16827 Isoform 2 c PTPRO    | 135 kDa | 10600000 | 14600000 | 21500000 | 8316000  | 8166300  |
| sp P51149 Ras-related RAB7A    | 23 kDa  | 7590000  | 11600000 | 10500000 | 5531400  | 11700000 |
| sp O76041 Isoform 2 c NEBL     | 31 kDa  | 50600000 | 63700000 | 5.70E+07 | 14900000 | 24900000 |
| sp Q8IVN8 Somatome SBSPON      | 30 kDa  | 6881000  | 4587000  | 0        | 2973800  | 0        |
| sp Q9Y4B5 Microtubul MTCL1     | 210 kDa | 77200000 | 0        | 0        | 0        | 0        |
| sp Q7Z6Z7 Isoform 2 c HUWE1    | 480 kDa | 1093100  | 3136100  | 1170000  | 1246600  | 1908300  |
| sp P00505 Aspartate a GOT2     | 48 kDa  | 12400000 | 38600000 | 22800000 | 8475000  | 3.00E+07 |

|                                      |         |          |          |          |          |          |
|--------------------------------------|---------|----------|----------|----------|----------|----------|
| sp P18428 Lipopolysac LBP            | 53 kDa  | 13100000 | 17300000 | 9986700  | 1007300  | 991490   |
| sp P19367 Isoform 2 c HK1            | 102 kDa | 12100000 | 6687300  | 10500000 | 4270300  | 8289200  |
| sp P50454 Serpin H1 SERPINH1         | 46 kDa  | 15600000 | 37500000 | 29500000 | 5027200  | 22100000 |
| sp Q08257 Isoform 3 c CRYZ           | 32 kDa  | 20800000 | 27400000 | 23100000 | 16900000 | 21100000 |
| sp P40763 Isoform De STAT3           | 88 kDa  | 9672100  | 14600000 | 12300000 | 4730900  | 6507200  |
| sp O15143 Actin-relate ARPC1B        | 41 kDa  | 2.30E+07 | 14900000 | 26600000 | 8147700  | 24700000 |
| sp O15145 Actin-relate ARPC3         | 21 kDa  | 21400000 | 30100000 | 26900000 | 9817200  | 20500000 |
| sp O95782 Isoform B c AP2A1          | 105 kDa | 5302800  | 9199800  | 5374900  | 3455800  | 11200000 |
| sp P20930 Filaggrin FLG              | 435 kDa | 0        | 0        | 0        | 0        | 0        |
| sp P00352 Retinal deh ALDH1A1        | 55 kDa  | 9206300  | 16400000 | 7233400  | 19900000 | 15400000 |
| sp P00491 Purine nucl PNP            | 32 kDa  | 1786500  | 5830900  | 5746500  | 5366600  | 3080500  |
| sp P05026 Isoform 2 c ATP1B1         | 35 kDa  | 27100000 | 50700000 | 31700000 | 6486300  | 31300000 |
| sp O75947 Isoform 2 c ATP5H          | 16 kDa  | 5658800  | 22800000 | 10200000 | 1526200  | 1631900  |
| sp Q9BR76 Coronin-1B CORO1B          | 54 kDa  | 8014000  | 14900000 | 6390800  | 0        | 3366500  |
| sp P61604 10 kDa hea HSPE1           | 11 kDa  | 29100000 | 18100000 | 15600000 | 11200000 | 17200000 |
| sp P50995 Isoform 2 c ANXA11         | 51 kDa  | 11200000 | 9676400  | 4369100  | 4209700  | 0        |
| sp P50552 Vasodilator VASP           | 40 kDa  | 5538000  | 8872600  | 4598800  | 0        | 7591000  |
| sp O14773 Isoform 2 c TPP1           | 34 kDa  | 6754300  | 4846700  | 11200000 | 1812500  | 3517800  |
| sp P37837 Transaldolase TALDO1       | 38 kDa  | 16500000 | 25100000 | 24200000 | 8323100  | 26700000 |
| sp Q6UWP Suprabasin SBSN             | 61 kDa  | 0        | 0        | 0        | 0        | 0        |
| sp Q9NZT1 Calmodulin CALML5          | 16 kDa  | 0        | 0        | 0        | 0        | 0        |
| sp Q99714 3-hydroxy HSD17B10         | 27 kDa  | 9333600  | 13400000 | 7367900  | 6250300  | 1.10E+07 |
| sp P62140 Serine/thre PPP1CB         | 37 kDa  | 1146400  | 2054700  | 3263100  | 465310   | 2930800  |
| sp P16284 Isoform De PECAM1          | 80 kDa  | 6300700  | 12200000 | 4771200  | 2268500  | 5953400  |
| sp P20073 Isoform 2 c ANXA7          | 50 kDa  | 9940500  | 0        | 14600000 | 0        | 2818600  |
| sp Q16836 Isoform 2 c HADH           | 42 kDa  | 6514300  | 5239200  | 14800000 | 3525300  | 6108500  |
| sp P32455 Interferon- GBP1           | 68 kDa  | 5150900  | 16600000 | 11900000 | 1661400  | 14200000 |
| sp P31151 Protein S1C S100A7         | 11 kDa  | 0        | 0        | 0        | 0        | 0        |
| sp P25787 Proteasom PSMA2            | 26 kDa  | 8455700  | 10600000 | 6804700  | 3613800  | 6578400  |
| sp Q14118 Dystroglyca DAG1           | 97 kDa  | 1253700  | 10300000 | 11200000 | 2203000  | 5793400  |
| sp Q9HC84 Mucin-5B MUC5B             | 596 kDa | 0        | 0        | 0        | 0        | 0        |
| sp Q14203 Isoform 3 c DCTN1          | 137 kDa | 1616000  | 706840   | 1474100  | 1801400  | 0        |
| sp P48047 ATP synthase ATP5O         | 23 kDa  | 8810700  | 17600000 | 1518200  | 781290   | 1308300  |
| sp Q99536 Synaptic ve VAT1           | 42 kDa  | 0        | 0        | 5906900  | 0        | 888680   |
| tr K7ELL7  Glucosidase PRKCSH        | 60 kDa  | 0        | 0        | 0        | 0        | 0        |
| sp P34932 Heat shock HSPA4           | 94 kDa  | 4216200  | 7672000  | 0        | 394550   | 1989900  |
| sp P04844 Isoform 2 c RPN2           | 68 kDa  | 348840   | 12700000 | 9353300  | 3776100  | 8792200  |
| sp P0DJ18  Serum amy SAA1            | 14 kDa  | 29100000 | 39900000 | 43400000 | 8383300  | 18200000 |
| sp P31949 Protein S1C S100A11        | 12 kDa  | 0        | 245640   | 269080   | 305250   | 328450   |
| sp Q04446 1,4-alpha-g GBE1           | 80 kDa  | 9246300  | 12900000 | 9891500  | 3461600  | 5407100  |
| sp Q14974 Importin subunit KPNB1     | 97 kDa  | 0        | 6795500  | 16500000 | 6410300  | 1.10E+07 |
| sp Q9BQ19 Isoform 2 c NRIP2          | 30 kDa  | 0        | 2621200  | 5438800  | 522160   | 708100   |
| sp Q9HCM Isoform 3 c EPB41L5         | 82 kDa  | 973830   | 1435800  | 2615200  | 3733000  | 9325500  |
| sp P05387 60S acidic ribosomal RPLP2 | 12 kDa  | 29200000 | 47100000 | 36600000 | 2.10E+07 | 38500000 |
| sp P60033 CD81 antigen CD81          | 26 kDa  | 39400000 | 58400000 | 44100000 | 10600000 | 23400000 |
| sp Q06323 Proteasom PSME1            | 29 kDa  | 0        | 1017300  | 1013300  | 874330   | 1021300  |
| sp O60763 General vesicle USO1       | 108 kDa | 8920800  | 6457400  | 7913300  | 0        | 3988600  |



|                                 |         |          |          |          |          |          |
|---------------------------------|---------|----------|----------|----------|----------|----------|
| sp P16152 Carbonyl re CBR1      | 30 kDa  | 9459900  | 7696300  | 1970500  | 3149600  | 6534500  |
| sp P50990 T-complex CCT8        | 60 kDa  | 13500000 | 9486700  | 14200000 | 4738200  | 15600000 |
| sp P62241 40S ribosor RPS8      | 24 kDa  | 2.30E+07 | 25300000 | 10700000 | 9575000  | 21900000 |
| sp Q96TA1 Isoform 2 c FAM129B   | 83 kDa  | 6536100  | 12200000 | 9070900  | 1627300  | 5157800  |
| sp Q9BW3 Tubulin pol TPPP3      | 19 kDa  | 2.20E+07 | 40300000 | 14600000 | 9759800  | 26200000 |
| sp Q96JE9 Microtubul MAP6       | 87 kDa  | 0        | 0        | 0        | 0        | 0        |
| sp Q13011 Delta(3,5)-I ECH1     | 36 kDa  | 1.70E+07 | 17800000 | 16300000 | 8036000  | 8613200  |
| sp O75874 Isocitrate d IDH1     | 47 kDa  | 9723700  | 1847400  | 3001300  | 4639600  | 1.00E+07 |
| sp Q8IWA! Isoform 2 c SLC44A2   | 81 kDa  | 1.10E+07 | 18300000 | 13600000 | 3125300  | 11700000 |
| sp Q9UH9! Isoform 3 c SUN2      | 80 kDa  | 1601500  | 1776400  | 1603200  | 1236800  | 1294400  |
| sp P05386 60S acidic r RPL1     | 12 kDa  | 2.20E+07 | 30300000 | 22500000 | 1.80E+07 | 12200000 |
| sp P11279 Lysosome-; LAMP1      | 45 kDa  | 0        | 0        | 0        | 1570100  | 1394200  |
| sp P00403 Cytochrom MT-CO2      | 26 kDa  | 8283700  | 26700000 | 5370600  | 3498700  | 9198600  |
| sp P08246 Neutrophil ELANE      | 29 kDa  | 0        | 0        | 0        | 0        | 0        |
| sp P17858 Isoform 2 c PFKL      | 90 kDa  | 0        | 0        | 0        | 0        | 0        |
| sp P21695 Isoform 2 c GPD1      | 35 kDa  | 4.80E+07 | 17100000 | 14500000 | 34300000 | 2.50E+07 |
| sp P61313 60S ribosor RPL15     | 24 kDa  | 0        | 2036100  | 987760   | 6849500  | 4946400  |
| sp Q9C0C2 182 kDa tai TNKS1BP1  | 182 kDa | 4403600  | 16600000 | 1.20E+07 | 3150800  | 8871200  |
| sp Q96IU4 Alpha/beta ABHD14B    | 22 kDa  | 16700000 | 21700000 | 16600000 | 3791200  | 9402400  |
| sp Q9UGIV Isoform 8 c DMBT1     | 181 kDa | 0        | 0        | 0        | 0        | 0        |
| sp P10599 Thioredoxii TXN       | 12 kDa  | 0        | 0        | 0        | 0        | 0        |
| sp P35558 Phosphoen PCK1        | 69 kDa  | 19600000 | 7085600  | 7408300  | 12200000 | 11600000 |
| sp Q06418 Tyrosine-pr TYRO3     | 97 kDa  | 557600   | 9386300  | 0        | 0        | 500290   |
| sp P43490 Nicotinami NAMPT      | 56 kDa  | 18700000 | 24800000 | 1.40E+07 | 5210900  | 1844800  |
| sp O75396 Vesicle-traf SEC22B   | 25 kDa  | 4035200  | 5875500  | 5332700  | 2335800  | 4408700  |
| sp P05455 Lupus La pr SSB       | 47 kDa  | 17300000 | 6374800  | 11300000 | 4849300  | 1.20E+07 |
| sp P58166 Inhibin bet. INHBE    | 39 kDa  | 0        | 22700000 | 7506800  | 4756800  | 15100000 |
| sp P63241 Isoform 2 c EIF5A     | 20 kDa  | 5483800  | 6750100  | 5216300  | 2727500  | 2433000  |
| tr G3V325 Protein ATFATP5J2-PTC | 84 kDa  | 7256800  | 17900000 | 8178100  | 3906000  | 5660500  |
| sp Q15907 Ras-related RAB11B    | 24 kDa  | 1.00E+07 | 12200000 | 10900000 | 9529200  | 8938700  |
| sp Q5SSJ5 Heterochrc HP1BP3     | 61 kDa  | 5086400  | 24200000 | 1.10E+07 | 2747300  | 10200000 |
| sp Q63ZY3 Isoform 2 c KANK2     | 92 kDa  | 2507700  | 3306700  | 836400   | 458720   | 1703400  |
| sp P63208 S-phase kin SKP1      | 19 kDa  | 5118800  | 12900000 | 8034500  | 3889300  | 4365400  |
| sp P00325 Alcohol del ADH1B     | 40 kDa  | 23300000 | 33600000 | 19800000 | 11800000 | 16800000 |
| sp CYB5_H sp CYB5_H CYB5        | 15 kDa  | 26900000 | 43200000 | 40900000 | 11400000 | 27800000 |
| sp O94832 Unconvent MYO1D       | 116 kDa | 2647900  | 8855500  | 1.10E+07 | 2521700  | 6034600  |
| sp O94919 Endonucle; ENDOD1     | 55 kDa  | 7163600  | 16300000 | 6621300  | 3257300  | 5874900  |
| sp P27144 Adenylate IAK4        | 25 kDa  | 45300000 | 3.60E+07 | 42100000 | 18200000 | 27700000 |
| sp P46108 Isoform Crk CRK       | 23 kDa  | 7599600  | 1286900  | 6318400  | 661190   | 676430   |
| sp P13667 Protein dis; PDIA4    | 73 kDa  | 7395200  | 3330600  | 1075100  | 0        | 11600000 |
| sp Q14019 Coactosin-I COTL1     | 16 kDa  | 21500000 | 8736200  | 5594400  | 8643100  | 5667300  |
| sp O75367 Isoform 1 c H2AFY     | 39 kDa  | 19500000 | 3.00E+07 | 2.10E+07 | 13500000 | 28800000 |
| sp P62701 40S ribosor RPS4X     | 30 kDa  | 7821000  | 18600000 | 16400000 | 7482700  | 19300000 |
| sp O75131 Copine-3 CPNE3        | 60 kDa  | 3108100  | 2705200  | 3590000  | 777380   | 3412900  |
| sp P06703 Protein S1C S100A6    | 10 kDa  | 0        | 0        | 3622000  | 0        | 0        |
| sp P07954 Isoform Cyl FH        | 50 kDa  | 17200000 | 778350   | 4699500  | 10400000 | 6667900  |
| sp P09972 Fructose-bi ALDOC     | 39 kDa  | 12500000 | 11900000 | 8653600  | 4485900  | 7602700  |

|                                |         |          |          |          |          |          |
|--------------------------------|---------|----------|----------|----------|----------|----------|
| sp Q14315 Isoform 2 c FLNC     | 287 kDa | 21800000 | 37900000 | 6321400  | 9466900  | 2.20E+07 |
| sp P17252 Protein kin. PRKCA   | 77 kDa  | 0        | 7746800  | 4950000  | 0        | 8553200  |
| sp Q9UBGI C-type mar MRC2      | 167 kDa | 0        | 2223700  | 1906800  | 0        | 1114200  |
| sp Q8WUP Isoform 3 c FBLIM1    | 31 kDa  | 18700000 | 3.10E+07 | 25300000 | 6372800  | 1.30E+07 |
| sp Q13409 Isoform 2B DYNC1I2   | 71 kDa  | 0        | 9153200  | 9360100  | 4538000  | 5812900  |
| sp O75915 PRA1 famil. ARL6IP5  | 22 kDa  | 6514600  | 23900000 | 14900000 | 6429400  | 1.00E+07 |
| sp P09429 High mobili HMGB1    | 25 kDa  | 16700000 | 52100000 | 12500000 | 8906100  | 1.40E+07 |
| sp P0CW2. 40S ribosor RPS17L   | 16 kDa  | 3917800  | 17400000 | 9709600  | 2635700  | 3900100  |
| sp P20160 Azurocidin AZU1      | 27 kDa  | 0        | 0        | 0        | 0        | 0        |
| sp Q92882 Osteoclast- OSTF1    | 24 kDa  | 1291500  | 2180200  | 10300000 | 919960   | 1383800  |
| sp Q14011 Cold-induci CIRBP    | 19 kDa  | 6266100  | 5373800  | 8395800  | 1756400  | 2065300  |
| sp P42166 Lamina-ass TMPO      | 75 kDa  | 5395400  | 9561200  | 6280700  | 1809200  | 1790500  |
| sp Q16543 Hsp90 co-c CDC37     | 44 kDa  | 5254600  | 1062700  | 6951400  | 5468100  | 4427700  |
| sp P12273 Prolactin-ir PIP     | 17 kDa  | 0        | 0        | 0        | 0        | 0        |
| sp P15090 Fatty acid-l FABP4   | 15 kDa  | 18900000 | 16900000 | 20500000 | 11300000 | 15800000 |
| sp P15880 40S ribosor RPS2     | 31 kDa  | 10200000 | 14700000 | 1467600  | 8580900  | 9294200  |
| sp P23526 Adenosylhc AHCY      | 48 kDa  | 9330700  | 9652200  | 0        | 3523900  | 8891600  |
| sp P62714 Serine/thre PPP2CB   | 36 kDa  | 8978400  | 0        | 4940200  | 1335400  | 3987200  |
| sp Q07960 Rho GTPase ARHGAP1   | 50 kDa  | 12600000 | 14500000 | 11800000 | 4181300  | 3559400  |
| sp Q13835 Isoform 1 c PKP1     | 80 kDa  | 0        | 0        | 0        | 0        | 0        |
| sp Q15121 Isoform 2 c PEA15    | 17 kDa  | 1.50E+07 | 27500000 | 15600000 | 6570800  | 0        |
| sp Q16762 Thiosulfate TST      | 33 kDa  | 7085800  | 39700000 | 7135900  | 2720800  | 5710500  |
| sp Q9H2G. Isoform 2 c SLK      | 139 kDa | 11800000 | 13600000 | 17300000 | 7441900  | 7655500  |
| sp O95336 6-phospho. PGLS      | 28 kDa  | 2763000  | 24900000 | 17300000 | 12100000 | 26300000 |
| sp P30837 Aldehyde d ALDH1B1   | 57 kDa  | 4804100  | 2541400  | 1660700  | 4139500  | 3214700  |
| sp P31146 Coronin-1A CORO1A    | 51 kDa  | 3215000  | 0        | 3741300  | 0        | 2899200  |
| sp P31323 cAMP-depe PRKAR2B    | 46 kDa  | 14900000 | 21700000 | 26600000 | 3608400  | 12400000 |
| sp P84103. Isoform 2 c SRSF3   | 14 kDa  | 6040500  | 10800000 | 43700000 | 18100000 | 33900000 |
| sp P07384 Calpain-1 c CAPN1    | 82 kDa  | 2088500  | 6057400  | 4680600  | 875500   | 6870300  |
| sp P26373 60S ribosor RPL13    | 24 kDa  | 9299000  | 13800000 | 8978800  | 3299700  | 0        |
| sp P11216 Glycogen p PYGB      | 97 kDa  | 799150   | 11100000 | 8915700  | 2593100  | 7508900  |
| sp P46782 40S ribosor RPS5     | 23 kDa  | 3964500  | 5688200  | 3280000  | 946160   | 2377300  |
| sp P61247 40S ribosor RPS3A    | 30 kDa  | 0        | 7114700  | 0        | 3019400  | 5920800  |
| sp P80404 4-aminobu ABAT       | 56 kDa  | 6772900  | 13800000 | 2887500  | 3567800  | 2979500  |
| sp Q03518 Antigen pe TAP1      | 87 kDa  | 2314400  | 7171000  | 5671800  | 916670   | 0        |
| sp Q9NZN. Isoform 2 c ARHGEF12 | 171 kDa | 4822600  | 35500000 | 320180   | 0        | 2.10E+07 |
| sp Q04917 14-3-3 prot YWHAH    | 28 kDa  | 16300000 | 19800000 | 1.27E+08 | 40400000 | 87900000 |
| sp Q9Y3Z3 Isoform 2 c SAMHD1   | 69 kDa  | 0        | 0        | 918000   | 1561400  | 479430   |
| sp P30711 Glutathion. GSTT1    | 27 kDa  | 0        | 15200000 | 5912200  | 2106300  | 0        |
| sp P30048. Isoform 2 c PRDX3   | 26 kDa  | 6777200  | 9291200  | 8326700  | 6065100  | 7386000  |
| sp Q13867 Bleomycin BLMH       | 53 kDa  | 0        | 0        | 0        | 1322800  | 0        |
| sp P62269 40S ribosor RPS18    | 18 kDa  | 6304100  | 10400000 | 8267700  | 0        | 6402000  |
| sp P61769 Beta-2-mic B2M       | 14 kDa  | 0        | 6410900  | 5733600  | 4349300  | 4132200  |
| sp P49368 T-complex CCT3       | 61 kDa  | 0        | 1248900  | 0        | 748420   | 6549600  |
| sp O43488 Aflatoxin B AKR7A2   | 40 kDa  | 3222200  | 4560400  | 0        | 8347900  | 1.20E+07 |
| sp P09496. Isoform No CLTA     | 24 kDa  | 12100000 | 20300000 | 23700000 | 2807200  | 6458500  |
| sp O94973 Isoform 2 c AP2A2    | 104 kDa | 1523100  | 1964000  | 1367200  | 591680   | 1479000  |

|                                                  |         |          |          |          |          |          |
|--------------------------------------------------|---------|----------|----------|----------|----------|----------|
| sp O60664 Isoform 4 c PLIN3                      | 46 kDa  | 0        | 13100000 | 761480   | 1873100  | 7783000  |
| sp P05090 Apolipoprotein APOD                    | 21 kDa  | 0        | 0        | 0        | 0        | 0        |
| sp P30050 60S ribosomal RPL12                    | 18 kDa  | 5036100  | 0        | 4737900  | 2476500  | 0        |
| sp P43686 Isoform 2 c PSMC4                      | 44 kDa  | 2830800  | 1964300  | 3671900  | 977740   | 720840   |
| sp Q12965 Unconventional MYO1E                   | 127 kDa | 4207500  | 11600000 | 6453400  | 0        | 7411200  |
| sp Q9NRV6 Heme-binding HEBP1                     | 21 kDa  | 9477400  | 13700000 | 12700000 | 3410400  | 7904000  |
| sp Q9Y310 tRNA-splicing RTCB                     | 55 kDa  | 6966600  | 9152000  | 8612700  | 0        | 5392500  |
| sp Q14117 Dihydropyridin DPYS                    | 57 kDa  | 2618400  | 3912100  | 2183300  | 681020   | 570610   |
| sp P13164 Interferon-IFITM1                      | 14 kDa  | 0        | 0        | 0        | 0        | 4155600  |
| sp Q9Y2D5 Isoform 3 c AKAP2                      | 104 kDa | 6466900  | 12100000 | 12700000 | 5373100  | 11800000 |
| sp P39023 60S ribosomal RPL3                     | 46 kDa  | 5831100  | 5653000  | 0        | 4067100  | 4792600  |
| sp P09936 Ubiquitin c UCHL1                      | 25 kDa  | 2.40E+07 | 34300000 | 28500000 | 4911500  | 1.10E+07 |
| sp P11766 Alcohol dehydrogenase ADH5             | 40 kDa  | 6082500  | 26200000 | 23700000 | 1.00E+07 | 10400000 |
| sp Q14574 Desmocollin DSC3                       | 100 kDa | 0        | 0        | 0        | 0        | 0        |
| sp Q96CM Isoform 2 c ACSF2                       | 71 kDa  | 19600000 | 7029800  | 15200000 | 7922100  | 8768500  |
| sp Q9Y2S2 Isoform 2 c CRYL1                      | 33 kDa  | 9978000  | 8103500  | 9085500  | 4980800  | 9173300  |
| sp P56537 Eukaryotic EIF6                        | 27 kDa  | 2319100  | 2259700  | 1837000  | 0        | 0        |
| sp P63167 Dynein light DYNLL1                    | 10 kDa  | 8404100  | 0        | 0        | 2675400  | 4573300  |
| sp P22352 Glutathione peroxidase GPX3            | 26 kDa  | 17200000 | 36300000 | 21500000 | 5409400  | 10900000 |
| sp P07858 Cathepsin B CTSB                       | 38 kDa  | 0        | 0        | 0        | 0        | 0        |
| sp P01833 Polymeric immunoglobulin receptor PIGR | 83 kDa  | 0        | 0        | 0        | 0        | 0        |
| sp P61019 Isoform 2 c RAB2A                      | 21 kDa  | 13700000 | 14900000 | 1.40E+07 | 7201100  | 23700000 |
| sp O43491 Band 4.1-like EPB41L2                  | 113 kDa | 8120100  | 1390200  | 19600000 | 5586900  | 5695700  |
| sp P60900 Isoform 2 c PSMA6                      | 25 kDa  | 8718000  | 4237900  | 7361800  | 4086000  | 2255500  |
| sp O75347 Tubulin-splicing TBCA                  | 13 kDa  | 0        | 0        | 0        | 0        | 0        |
| sp Q9UPZ6 Thrombospondin THSD7A                  | 185 kDa | 0        | 0        | 0        | 1271200  | 0        |
| sp P35080 Isoform IIb PFN2                       | 15 kDa  | 0        | 0        | 0        | 8336900  | 16100000 |
| sp Q13148 TAR DNA-binding TARDBP                 | 45 kDa  | 0        | 0        | 0        | 958560   | 2406200  |
| sp P01859 Ig gamma-1 IGHG2                       | 36 kDa  | 48200000 | 74100000 | 56900000 | 2.40E+07 | 45600000 |
| sp P62328 Thymosin beta TMSB4X                   | 5 kDa   | 0        | 0        | 0        | 0        | 0        |
| sp Q96QA6 Gasdermin GSDMA                        | 49 kDa  | 0        | 0        | 0        | 0        | 0        |
| sp Q9UQ0 Isoform 2 c CORO2B                      | 54 kDa  | 0        | 0        | 0        | 1360300  | 0        |
| sp P36578 60S ribosomal RPL4                     | 48 kDa  | 15100000 | 18700000 | 1.80E+07 | 1482400  | 5530700  |
| sp P62917 60S ribosomal RPL8                     | 28 kDa  | 9002700  | 13200000 | 8779200  | 4071700  | 8479600  |
| sp Q96G03 Phosphogluconate PGM2                  | 68 kDa  | 6208500  | 7404600  | 3396900  | 0        | 2836500  |
| sp P00390 Isoform Cyt GSR                        | 52 kDa  | 11100000 | 16300000 | 20500000 | 9251200  | 7919900  |
| sp P13861 Isoform 2 c PRKAR2A                    | 43 kDa  | 8747900  | 425030   | 9004700  | 1738800  | 9343800  |
| sp Q96DG6 Carboxypeptidase CMBL                  | 28 kDa  | 12300000 | 4127100  | 6800200  | 3474100  | 3633500  |
| sp Q96P63 Isoform 2 c SERPINB12                  | 48 kDa  | 0        | 0        | 0        | 0        | 0        |
| sp Q9HDC6 Isoform 2 c APMAP                      | 32 kDa  | 9289800  | 12400000 | 15200000 | 3549000  | 3942000  |
| sp P31689 DnaJ homolog DNAJA1                    | 45 kDa  | 0        | 4535000  | 4755900  | 2063100  | 2708100  |
| sp P46777 60S ribosomal RPL5                     | 34 kDa  | 0        | 0        | 0        | 0        | 0        |
| tr J3KQL8  Apolipoprotein APOL2                  | 49 kDa  | 472460   | 6676600  | 0        | 0        | 0        |
| sp P52597 Heterogeneous HNRNP                    | 46 kDa  | 13500000 | 2.70E+07 | 14700000 | 7648000  | 17700000 |
| sp P98172 Ephrin-B1 EFNB1                        | 38 kDa  | 4502200  | 8697900  | 5683700  | 1395400  | 5242300  |
| sp P98088 Mucin-5AC MUC5AC                       | 586 kDa | 0        | 0        | 0        | 0        | 0        |
| sp P12955 Isoform 2 c PEPD                       | 50 kDa  | 2881000  | 3636700  | 0        | 1759500  | 2639100  |

|                                |         |          |          |          |          |          |
|--------------------------------|---------|----------|----------|----------|----------|----------|
| sp Q53GQI Very-long-c HSD17B12 | 34 kDa  | 8989000  | 15200000 | 7728400  | 1803300  | 5977400  |
| sp P28066 Proteasom PSMA5      | 26 kDa  | 2501700  | 3151800  | 0        | 1509700  | 0        |
| sp P35268 60S ribosor RPL22    | 15 kDa  | 8863500  | 10400000 | 10600000 | 4321200  | 7903500  |
| sp P45974 Isoform Sh USP5      | 93 kDa  | 1433300  | 2460600  | 846800   | 419150   | 4692400  |
| sp P36957 Dihydrolipic DLST    | 49 kDa  | 5206300  | 5842000  | 7429700  | 2155400  | 5896800  |
| sp O95865 N(G),N(G)-c DDAH2    | 30 kDa  | 3456900  | 6880400  | 8904400  | 5174800  | 7521700  |
| sp Q07955 Isoform AS SRSF1     | 32 kDa  | 17700000 | 26600000 | 16900000 | 7666500  | 9693500  |
| sp Q9ULAC Aspartyl an DNPEP    | 52 kDa  | 0        | 0        | 9300300  | 0        | 0        |
| sp FABPH_sp FABPH_ FABPH       | 15 kDa  | 6621800  | 6849200  | 7472900  | 0        | 3971100  |
| sp O43242 26S protea PSMD3     | 61 kDa  | 1214800  | 1158100  | 1062700  | 744510   | 1101500  |
| sp P00740 Coagulation F9       | 52 kDa  | 18900000 | 33200000 | 19400000 | 3312000  | 5846400  |
| sp P24158 Myeloblast PRTN3     | 28 kDa  | 0        | 0        | 0        | 0        | 0        |
| sp P46778 60S ribosor RPL21    | 19 kDa  | 0        | 3680000  | 4543300  | 1174700  | 997480   |
| sp P51884 Lumican LUM          | 38 kDa  | 0        | 1879200  | 165830   | 3889100  | 5220600  |
| sp O00461 Golgi integri GOLIM4 | 82 kDa  | 0        | 2343800  | 0        | 0        | 2655400  |
| sp P48444 Coatome s ARCN1      | 57 kDa  | 683860   | 3300000  | 3772200  | 1395400  | 4411400  |
| sp Q96CW Isoform 2 c AP2M1     | 49 kDa  | 5547600  | 8550300  | 10700000 | 0        | 7503900  |
| sp Q9UEY Isoform 1 c ADD3      | 76 kDa  | 9149300  | 24500000 | 12100000 | 1724600  | 1453900  |
| sp Q96C23 Aldose 1-e GALM      | 38 kDa  | 1885700  | 903060   | 0        | 0        | 0        |
| sp P50570 Isoform 4 c DNM2     | 98 kDa  | 2478900  | 4142800  | 2138700  | 2866600  | 5992400  |
| sp Q01130 Isoform 2 c SRSF2    | 24 kDa  | 2865700  | 6147700  | 3258800  | 0        | 3222600  |
| sp P01040 Cystatin-A CSTA      | 11 kDa  | 0        | 0        | 0        | 0        | 0        |
| sp P62829 60S ribosor RPL23    | 15 kDa  | 0        | 3333400  | 0        | 1864500  | 0        |
| sp Q8NI99 Angiopoiet ANGPTL6   | 52 kDa  | 0        | 0        | 0        | 0        | 0        |
| sp Q9HCY Protein S1C S100A14   | 12 kDa  | 0        | 0        | 0        | 0        | 0        |
| tr F6TLX2 Glyoxalase GLOD4     | 55 kDa  | 8581500  | 26800000 | 8432400  | 4695900  | 11400000 |
| sp Q9BRA Thioredoxin TXNDC17   | 14 kDa  | 12300000 | 15500000 | 5810800  | 0        | 5165200  |
| sp P28289 Tropomod TMOD1       | 41 kDa  | 0        | 3573300  | 3586300  | 1070300  | 0        |
| sp Q9HD8 Resistin RETN         | 11 kDa  | 0        | 0        | 0        | 0        | 0        |
| sp O00487 26S protea PSMD14    | 35 kDa  | 2753200  | 3414200  | 1329900  | 1460800  | 2040800  |
| sp P36542 ATP syntha ATP5C1    | 33 kDa  | 5499900  | 8997000  | 8594800  | 2472700  | 8563600  |
| sp Q7L576 Cytoplasmic CYFIP1   | 145 kDa | 1700700  | 3756100  | 0        | 901640   | 1232300  |
| sp P11177 Isoform 2 c PDHB     | 37 kDa  | 6791700  | 9704400  | 8326100  | 2905900  | 4506400  |
| sp Q9BQI0 Allograft in AIF1L   | 17 kDa  | 0        | 0        | 0        | 0        | 0        |
| sp Q8N3R Isoform 2 c MPP5      | 73 kDa  | 2425400  | 4472500  | 8440500  | 2015500  | 8635000  |
| sp P51572 Isoform 2 c BCAP31   | 35 kDa  | 13600000 | 17500000 | 9962600  | 3428000  | 0        |
| sp P78417 Glutathione GSTO1    | 28 kDa  | 5311200  | 5908700  | 0        | 2743900  | 5315000  |
| sp P36269 Isoform 2 c GGT5     | 59 kDa  | 2409700  | 1043800  | 2659700  | 1615200  | 4166600  |
| sp O15400 Isoform 2 c STX7     | 27 kDa  | 4873200  | 6448700  | 10200000 | 4384700  | 3660100  |
| sp P12724 Eosinophil RNASE3    | 18 kDa  | 0        | 0        | 0        | 0        | 0        |
| sp P61970 Nuclear tra NUTF2    | 14 kDa  | 0        | 4346500  | 2235100  | 2373400  | 2752700  |
| sp Q00325 Isoform B c SLC25A3  | 40 kDa  | 40100000 | 56600000 | 38300000 | 18300000 | 35900000 |
| sp P62263 40S ribosor RPS14    | 16 kDa  | 0        | 4426800  | 2796300  | 0        | 0        |
| tr F5H2F4 C-1-tetrahy MTHFD1   | 111 kDa | 5830000  | 7450600  | 4596600  | 1851200  | 2577400  |
| sp P07148 Fatty acid-f FABP1   | 14 kDa  | 0        | 0        | 0        | 0        | 0        |
| sp O00232 26S protea PSMD12    | 53 kDa  | 2154600  | 3265800  | 1657300  | 1309900  | 1952300  |
| tr M0QYS1 60S ribosor RPL13A   | 24 kDa  | 0        | 0        | 0        | 815840   | 0        |

|                               |         |          |          |          |          |          |
|-------------------------------|---------|----------|----------|----------|----------|----------|
| sp P53621-Isoform 2 c COPA    | 139 kDa | 0        | 4414900  | 2303100  | 1497400  | 4458500  |
| tr H0Y300 Haptoglobi HP       | 49 kDa  | 0        | 0        | 0        | 0        | 0        |
| sp Q9UI42-Isoform 2 c CPA4    | 44 kDa  | 0        | 0        | 0        | 0        | 0        |
| sp O75891-Isoform 3 c ALDH1L1 | 100 kDa | 1377300  | 1656700  | 2894400  | 1546600  | 984660   |
| sp P02790-Hemopexin HPX       | 52 kDa  | 6338300  | 5987600  | 5465700  | 1973200  | 0        |
| sp P62888-60S ribosor RPL30   | 13 kDa  | 3062900  | 0        | 0        | 0        | 0        |
| sp P00441-Superoxide SOD1     | 16 kDa  | 0        | 0        | 0        | 0        | 0        |
| sp Q8NBS5-Thioredoxin TXNDC5  | 48 kDa  | 3163500  | 2237000  | 4371000  | 0        | 2631800  |
| sp P32969-60S ribosor RPL9    | 22 kDa  | 3044300  | 4754000  | 4429400  | 4222200  | 7699200  |
| sp P22695-Cytochrom UQCRC2    | 48 kDa  | 4920800  | 13600000 | 6765100  | 0        | 7865500  |
| sp P62081-40S ribosor RPS7    | 22 kDa  | 0        | 0        | 5743900  | 2088100  | 3018200  |
| sp P49593-Protein phc PPM1F   | 50 kDa  | 7529800  | 11200000 | 0        | 3043800  | 6355600  |
| sp Q13185-Chromobox CBX3      | 21 kDa  | 385390   | 5182200  | 357530   | 0        | 1985300  |
| sp O15511-Actin-relate ARPC5  | 16 kDa  | 10900000 | 13200000 | 0        | 0        | 0        |
| sp Q02818-Nucleobind NUCB1    | 54 kDa  | 0        | 0        | 0        | 0        | 0        |
| sp P09619-Platelet-de PDGFRB  | 124 kDa | 0        | 0        | 9177700  | 2730400  | 7801900  |
| sp P31930-Cytochrom UQCRC1    | 53 kDa  | 0        | 0        | 0        | 763460   | 3603900  |
| sp P55000-Secreted Ly SLURP1  | 11 kDa  | 0        | 0        | 0        | 0        | 0        |
| sp Q9UNZ-Isoform 3 c NSF1C    | 41 kDa  | 2227400  | 0        | 0        | 0        | 2969400  |
| sp Q9Y2A7-Isoform 2 c NCKAP1  | 130 kDa | 666250   | 0        | 523830   | 1325200  | 0        |
| sp P49591-Serine--tRN SARS    | 59 kDa  | 0        | 1180500  | 979310   | 759140   | 1620700  |
| sp P49755-Transmeml TMED10    | 25 kDa  | 4373000  | 10100000 | 8080900  | 3046000  | 7557800  |
| sp P35270-Sepiapterin SPR     | 28 kDa  | 466700   | 399290   | 0        | 0        | 0        |
| sp P39656-Isoform 2 c DDOST   | 47 kDa  | 109340   | 3361700  | 570420   | 1466900  | 3082400  |
| sp Q96AM-Mas-relate MRGPRF    | 38 kDa  | 0        | 0        | 0        | 0        | 0        |
| sp Q9UJC5-SH3 domai SH3BGRL2  | 12 kDa  | 0        | 0        | 0        | 0        | 2465300  |
| sp O75531-Barrier-to-ε BANF1  | 10 kDa  | 8961500  | 0        | 0        | 0        | 6095400  |
| sp P31937-3-hydroxyis HIBADH  | 35 kDa  | 4442000  | 0        | 0        | 0        | 0        |
| sp P17980-26S protea: PSMC3   | 49 kDa  | 1850100  | 2931900  | 0        | 1649300  | 3765800  |
| sp P62753-40S ribosor RPS6    | 29 kDa  | 4987000  | 6232000  | 0        | 0        | 0        |
| sp P62899-60S ribosor RPL31   | 14 kDa  | 0        | 13500000 | 0        | 0        | 9771600  |
| sp P22735-Protein-glu TGM1    | 90 kDa  | 0        | 0        | 0        | 0        | 0        |
| sp P62191-26S protea: PSMC1   | 49 kDa  | 0        | 3430000  | 0        | 0        | 2988300  |
| sp Q9Y5K6-CD2-associ: CD2AP   | 71 kDa  | 409460   | 3765400  | 3303900  | 4677700  | 5173300  |
| sp P04080-Cystatin-B CSTB     | 11 kDa  | 0        | 0        | 0        | 0        | 0        |
| sp O75390-Citrate synt CS     | 52 kDa  | 8584100  | 1.50E+07 | 9220800  | 10400000 | 14100000 |
| sp P53396-ATP-citrate ACLY    | 121 kDa | 2687000  | 3635900  | 389680   | 265800   | 1803400  |
| sp O95183-Vesicle-ass: VAMP5  | 13 kDa  | 4634500  | 0        | 4794400  | 2011700  | 4686000  |
| sp P07814-Bifunctiona EPRS    | 171 kDa | 0        | 1300200  | 681490   | 0        | 1228400  |
| sp P05230-Fibroblast ξ FGF1   | 17 kDa  | 971340   | 1565700  | 1168300  | 616400   | 824860   |
| sp P51858-Hepatoma- HDGF      | 27 kDa  | 10400000 | 16300000 | 9047500  | 0        | 8688700  |
| sp P52566-Rho GDP-d ARHGDI B  | 23 kDa  | 0        | 0        | 0        | 0        | 0        |
| sp Q6IB77-Glycine N-α GLYAT   | 34 kDa  | 0        | 0        | 7573800  | 0        | 0        |
| sp P12429-Annexin A3 ANXA3    | 36 kDa  | 0        | 6725500  | 0        | 3577700  | 1339000  |
| sp P34896-Isoform 2 c SHMT1   | 49 kDa  | 6733300  | 0        | 11800000 | 9098900  | 8450500  |
| sp Q5T750-Skin-specifi XP32   | 26 kDa  | 0        | 0        | 0        | 0        | 0        |
| sp Q9C075-Keratin, tyç KRT23  | 48 kDa  | 0        | 0        | 0        | 0        | 0        |

|                                           |         |          |          |          |          |          |
|-------------------------------------------|---------|----------|----------|----------|----------|----------|
| sp O14494 Isoform 2 c PPAP2A              | 32 kDa  | 8944900  | 21100000 | 9196800  | 8156300  | 18500000 |
| sp Q99733 Isoform 2 c NAP1L4              | 44 kDa  | 0        | 672170   | 0        | 255840   | 453820   |
| sp O14980 Exportin-1 XPO1                 | 123 kDa | 1092600  | 1428200  | 1728200  | 1027800  | 0        |
| sp O75936 Gamma-bu BBOX1                  | 45 kDa  | 3302500  | 0        | 0        | 0        | 2505200  |
| sp P23284 Peptidyl-pr PPIB                | 24 kDa  | 0        | 0        | 0        | 0        | 0        |
| sp P47929 Galectin-7 LGALS7               | 15 kDa  | 0        | 0        | 0        | 0        | 0        |
| sp P62330 ADP-ribosy ARF6                 | 20 kDa  | 7469900  | 37100000 | 4240600  | 1922500  | 8591300  |
| sp Q9Y678 Coatomer s COPG1                | 98 kDa  | 0        | 0        | 1120700  | 0        | 2787500  |
| sp P53597 Succinyl-Cc SUCLG1              | 36 kDa  | 14200000 | 17600000 | 7339100  | 1810300  | 0        |
| sp Q92804 Isoform Sh TAF15                | 62 kDa  | 7343700  | 8076500  | 8668100  | 1980600  | 3961000  |
| sp P31939 Isoform 2 c ATIC                | 65 kDa  | 0        | 11700000 | 503080   | 0        | 3369700  |
| sp Q14108 Lysosome r SCARB2               | 54 kDa  | 0        | 0        | 0        | 0        | 0        |
| sp Q9NZ0E Isoform 2 c ERAP1               | 108 kDa | 1541500  | 2194700  | 1385900  | 870180   | 1315900  |
| sp O75954 Tetraspanin TSPAN9              | 27 kDa  | 6070300  | 9793400  | 5785200  | 2986900  | 4734900  |
| sp P29279 Connective CTGF                 | 38 kDa  | 0        | 0        | 0        | 0        | 2501300  |
| sp Q0VF96 Cingulin-lik CGNL1              | 149 kDa | 2344000  | 3906300  | 10400000 | 6140200  | 0        |
| sp Q9BX68 Histidine tr HINT2              | 17 kDa  | 3246300  | 3582600  | 2769400  | 2177100  | 2678500  |
| sp Q9NR31 GTP-bindin SAR1A                | 22 kDa  | 2265000  | 2821500  | 2264100  | 832760   | 1097100  |
| sp P20700 Lamin-B1 LMNB1                  | 66 kDa  | 2473000  | 15100000 | 3601700  | 1856500  | 9770800  |
| sp P02647 Apolipoprotein A1 APOA1         | 31 kDa  | 0        | 0        | 0        | 0        | 0        |
| sp Q8N33E Glycerol-3- GPD1L               | 38 kDa  | 8403000  | 0        | 856250   | 4107300  | 8910800  |
| sp Q9NZN4 EH domain EHD2                  | 61 kDa  | 3470700  | 3295000  | 3299900  | 1419600  | 3547400  |
| sp Q9P2R7 Isoform 2 c SUCLA2              | 48 kDa  | 8062200  | 0        | 4923300  | 0        | 0        |
| sp P53004 Biliverdin reductase BLVRA      | 33 kDa  | 29600000 | 50100000 | 38700000 | 12800000 | 20800000 |
| sp P21266 Glutathione S-transferase GSTM3 | 27 kDa  | 0        | 4161100  | 2912100  | 0        | 0        |
| sp Q14894 Ketimine reductase CRYM         | 34 kDa  | 0        | 0        | 2059200  | 403800   | 1643700  |
| sp Q6NUJ1 Proactivator 1 PSAPL1           | 57 kDa  | 0        | 0        | 0        | 0        | 0        |
| sp P28065 Isoform LM PSMB9                | 22 kDa  | 0        | 1474400  | 0        | 0        | 0        |
| sp P30043 Flavin reductase BLVRB          | 22 kDa  | 0        | 0        | 0        | 0        | 0        |
| sp P61353 60S ribosome RPL27              | 16 kDa  | 0        | 0        | 0        | 2371800  | 9155200  |
| sp Q9Y224 UPF0568 protein C14orf166       | 28 kDa  | 0        | 4098600  | 0        | 0        | 0        |
| sp Q8NC5E LEM domain LEMD2                | 57 kDa  | 0        | 10900000 | 4524100  | 0        | 8753500  |
| sp O60884 DnaJ homolog DNAJA2             | 46 kDa  | 0        | 0        | 0        | 601830   | 854940   |
| sp P25325 Isoform 2 c MPST                | 35 kDa  | 891430   | 3289600  | 1599300  | 2544900  | 3797300  |
| sp Q9UBR2 Cathepsin z CTSZ                | 34 kDa  | 0        | 0        | 0        | 0        | 0        |
| sp P46783 40S ribosome RPS10              | 19 kDa  | 1085100  | 0        | 0        | 792710   | 783810   |
| sp P03973 Antileukoprotein SLPI           | 14 kDa  | 0        | 0        | 0        | 0        | 0        |
| sp P11215 Isoform 2 c ITGAM               | 127 kDa | 0        | 0        | 0        | 0        | 0        |
| sp P80188 Neutrophil LCN2                 | 23 kDa  | 0        | 0        | 0        | 0        | 0        |
| sp Q6YN1E Hydroxysteroid HSDL2            | 45 kDa  | 3524900  | 3314400  | 2261000  | 0        | 0        |
| sp Q96CX2 BTB/POZ domain KCTD12           | 36 kDa  | 0        | 0        | 0        | 2558500  | 4897400  |
| sp Q9Y617 Phosphoserine PSAT1             | 40 kDa  | 6514300  | 10900000 | 0        | 1143800  | 0        |
| sp P84098 60S ribosome RPL19              | 23 kDa  | 0        | 0        | 0        | 0        | 0        |
| sp Q8NFJ5 Retinoic acid GPRC5A            | 40 kDa  | 0        | 1.80E+07 | 7727300  | 6734500  | 10700000 |
| sp Q9UL25 Ras-related RAB21               | 24 kDa  | 0        | 6003700  | 0        | 0        | 0        |
| sp Q15274 Nicotinate- QPRT                | 31 kDa  | 0        | 8403200  | 5866200  | 3322400  | 0        |
| sp P31948 Isoform 2 c STIP1               | 68 kDa  | 6568700  | 8727000  | 6656700  | 3295200  | 7774900  |

|                                 |         |          |          |          |          |          |
|---------------------------------|---------|----------|----------|----------|----------|----------|
| sp O00264 Membrane PGRMC1       | 22 kDa  | 0        | 0        | 0        | 0        | 0        |
| sp P61960 Ubiquitin-f UFM1      | 9 kDa   | 1425200  | 2582300  | 1449800  | 1115900  | 3584700  |
| sp O95154 Aflatoxin B AKR7A3    | 37 kDa  | 5806700  | 0        | 0        | 2761500  | 0        |
| sp O15173 Isoform 2 c PGRMC2    | 26 kDa  | 4319500  | 0        | 4486500  | 5971000  | 10400000 |
| sp P43034 Platelet-act PAFAH1B1 | 47 kDa  | 0        | 0        | 0        | 0        | 0        |
| sp P62913- Isoform 2 c RPL11    | 20 kDa  | 12500000 | 15200000 | 7278300  | 3633400  | 11500000 |
| sp P10253 Lysosomal GAA         | 105 kDa | 0        | 0        | 0        | 0        | 0        |
| sp Q96NY7 Isoform A c CLIC6     | 71 kDa  | 18900000 | 22700000 | 12200000 | 13800000 | 18900000 |
| sp P31025 Lipocalin-1 LCN1      | 19 kDa  | 0        | 0        | 0        | 0        | 0        |
| sp O75223 Gamma-glu GGCT        | 21 kDa  | 0        | 0        | 0        | 0        | 0        |
| sp P35754 Glutaredox GLRX       | 12 kDa  | 0        | 0        | 0        | 0        | 0        |
| sp O15247 Chloride in CLIC2     | 28 kDa  | 0        | 4654000  | 3000100  | 0        | 0        |
| sp P09497- Isoform No CLTB      | 23 kDa  | 0        | 0        | 0        | 0        | 0        |
| sp P16401 Histone H1 HIST1H1B   | 23 kDa  | 0        | 0        | 0        | 0        | 0        |
| sp P20618 Proteasom PSMB1       | 26 kDa  | 0        | 0        | 0        | 0        | 0        |
| sp Q9P1F3 Costars fan ABRACL    | 9 kDa   | 0        | 0        | 0        | 0        | 0        |
| sp P62318- Isoform 2 c SNRPD3   | 13 kDa  | 0        | 0        | 0        | 0        | 0        |
| sp Q9Y6I3- Isoform 2 c EPN1     | 69 kDa  | 0        | 0        | 0        | 0        | 0        |
| sp O75436 Vacuolar pi VPS26A    | 38 kDa  | 2937900  | 0        | 4329900  | 0        | 4294600  |
| sp P01861 Ig gamma- IGHG4       | 36 kDa  | 52900000 | 67500000 | 58600000 | 88500000 | 1.59E+08 |
| sp P14780 Matrix met MMP9       | 78 kDa  | 0        | 0        | 0        | 0        | 0        |
| sp Q8WVV Isoform 1 c POF1B      | 69 kDa  | 0        | 0        | 0        | 0        | 0        |
| sp P01008 Antithromk SERPINC1   | 53 kDa  | 0        | 3604900  | 2852100  | 996300   | 3878800  |
| sp O43175 D-3-phosph PHGDH      | 57 kDa  | 4339800  | 100070   | 3931100  | 0        | 0        |
| sp P11233 Ras-related RALA      | 24 kDa  | 4527300  | 8553200  | 910190   | 0        | 3225900  |
| sp P09417 Dihydropte QDPR       | 26 kDa  | 0        | 0        | 0        | 0        | 0        |
| sp Q9UIJ7 GTP:AMP p AK3         | 26 kDa  | 2129500  | 0        | 8296300  | 1098000  | 1018400  |
| sp P49588- Isoform 2 c AARS     | 109 kDa | 0        | 0        | 0        | 0        | 1797900  |
| sp P05107 Integrin be ITGB2     | 85 kDa  | 0        | 0        | 0        | 0        | 0        |
| sp P24534 Elongation EEF1B2     | 25 kDa  | 0        | 0        | 7545800  | 0        | 10100000 |
| sp Q07021 Compleme C1QBP        | 31 kDa  | 0        | 0        | 0        | 0        | 0        |
| sp Q96MM Heat shock HSPA12B     | 76 kDa  | 0        | 0        | 7189200  | 1391700  | 10800000 |
| sp P09543- Isoform CN CNP       | 45 kDa  | 2637500  | 2958600  | 4367100  | 1679000  | 2440300  |
| sp P13473- Isoform LAI LAMP2    | 45 kDa  | 0        | 0        | 0        | 0        | 0        |
| sp Q8TDL5 BPI fold-co BPIFB1    | 52 kDa  | 0        | 0        | 0        | 0        | 0        |
| sp Q9NP55 Isoform 2 c BPIFA1    | 25 kDa  | 0        | 0        | 0        | 0        | 0        |
| sp Q13155 Aminoacyl AIMP2       | 35 kDa  | 0        | 8063400  | 0        | 0        | 0        |
| sp O14561 Acyl carrier NDUFAB1  | 17 kDa  | 0        | 0        | 0        | 0        | 0        |
| sp P50148 Guanine nu GNAQ       | 42 kDa  | 0        | 6746100  | 214660   | 0        | 3577400  |
| sp O75489 NADH dehy NDUFS3      | 30 kDa  | 0        | 0        | 0        | 0        | 6081400  |
| sp P30040 Endoplasm ERP29       | 29 kDa  | 3722400  | 0        | 0        | 0        | 2035400  |
| sp Q92747 Actin-relate ARPC1A   | 42 kDa  | 5151300  | 0        | 0        | 1744000  | 6722900  |
| sp Q9Y277 Isoform 2 c VDAC3     | 31 kDa  | 10700000 | 19300000 | 10800000 | 2099400  | 14800000 |
| sp P51571 Translocon SSR4       | 19 kDa  | 4326100  | 7370600  | 11400000 | 4572500  | 4839200  |
| sp P25815 Protein S1C S100P     | 10 kDa  | 0        | 0        | 0        | 0        | 0        |
| sp Q6ZVX7 F-box only NCCRP1     | 31 kDa  | 0        | 0        | 0        | 0        | 0        |
| sp Q96HE7 ERO1-like p ERO1L     | 54 kDa  | 4106500  | 0        | 3117700  | 332440   | 562920   |

|                                  |         |          |          |          |          |          |
|----------------------------------|---------|----------|----------|----------|----------|----------|
| sp Q9NQW Isoform 3 c XPNPEP1     | 75 kDa  | 0        | 3473000  | 0        | 0        | 702820   |
| sp P01591 Immunogl c IGJ         | 18 kDa  | 0        | 0        | 0        | 0        | 0        |
| sp P31947 Isoform 2 c SFN        | 24 kDa  | 0        | 0        | 89100000 | 35800000 | 7.60E+07 |
| sp P51452 Dual specif DUSP3      | 20 kDa  | 0        | 2878900  | 0        | 0        | 3527900  |
| sp Q16378 Proline-rich PRR4      | 15 kDa  | 0        | 0        | 0        | 0        | 0        |
| sp Q9H444 Charged m CHMP4B       | 25 kDa  | 0        | 4608400  | 0        | 0        | 0        |
| sp Q9Y287 Integral me ITM2B      | 30 kDa  | 0        | 0        | 0        | 0        | 0        |
| sp Q15293 Reticulocal RCN1       | 39 kDa  | 0        | 0        | 0        | 0        | 0        |
| sp Q6DN0: Putative hi: HIST2H2BC | 21 kDa  | 28100000 | 5.60E+07 | 25500000 | 2.40E+07 | 0        |
| sp Q8NCW NAD(P)H-h APOA1BP       | 32 kDa  | 3366000  | 0        | 7231100  | 0        | 6025400  |
| sp P59827 Isoform 2 c BPIFB4     | 61 kDa  | 0        | 0        | 0        | 0        | 0        |
| sp O75342 Arachidona ALOX12B     | 80 kDa  | 0        | 0        | 0        | 0        | 0        |
| sp P13073 Cytochrom COX4I1       | 20 kDa  | 0        | 8271800  | 4859900  | 0        | 4184600  |
| sp P35222 Catenin bei CTNNB1     | 85 kDa  | 0        | 0        | 0        | 0        | 0        |
| sp P49913 Cathelicidin CAMP      | 19 kDa  | 0        | 0        | 0        | 0        | 0        |
| sp Q5VU1: V-set and ir VSIG8     | 44 kDa  | 0        | 0        | 0        | 0        | 0        |
| sp P62277 40S ribosor RPS13      | 17 kDa  | 0        | 0        | 0        | 0        | 0        |
| sp Q96DA0 Zymogen g ZG16B        | 23 kDa  | 0        | 0        | 0        | 0        | 0        |
| sp Q9H853 Putative tu TUBA4B     | 28 kDa  | 72900000 | 90600000 | 71700000 | 47800000 | 77400000 |
| sp P20061 Transcobal: TCN1       | 48 kDa  | 0        | 0        | 0        | 0        | 0        |
| sp Q02543 60S ribosor RPL18A     | 21 kDa  | 0        | 0        | 0        | 0        | 0        |
| sp Q14651 Plastin-1 PLS1         | 70 kDa  | 37800000 | 53700000 | 47200000 | 12900000 | 3.10E+07 |
| sp P25788 Isoform 2 c PSMA3      | 28 kDa  | 0        | 0        | 0        | 0        | 0        |
| sp P01620 Ig kappa ch KV302      | 12 kDa  | 0        | 0        | 0        | 0        | 0        |
| sp P21333 Isoform 2 c FLNA       | 280 kDa | 1.85E+09 | 2.76E+09 | 2.15E+09 | NA       | NA       |
| sp P02533 Keratin, ty c KRT14    | 52 kDa  | 1.05E+09 | 9.00E+07 | 1.98E+08 | NA       | NA       |
| sp P63261 Actin, cyto c ACTG1    | 42 kDa  | 1.97E+10 | 2.65E+10 | 2.25E+10 | NA       | NA       |
| sp P02671 Fibrinogen FGA         | 95 kDa  | 1.11E+09 | 9.42E+08 | 5.24E+08 | NA       | NA       |
| sp P06396 Isoform 2 c GSN        | 81 kDa  | 6.87E+08 | 1.12E+09 | 7.82E+08 | NA       | NA       |
| sp Q6PEY2 Tubulin alp TUBA3E     | 50 kDa  | 1.99E+09 | 2.95E+09 | 2.21E+09 | NA       | NA       |
| sp P53675 Isoform 2 c CLTCL1     | 180 kDa | 2.27E+08 | 3.54E+08 | 2.87E+08 | NA       | NA       |
| sp P29400 Isoform 2 c COL4A5     | 162 kDa | 9.17E+08 | 5.81E+08 | 6.14E+08 | NA       | NA       |
| tr G3V1L9  Tight juncti TJP1     | 197 kDa | 2.09E+08 | 4.44E+08 | 2.79E+08 | NA       | NA       |
| sp P14618 Isoform M1 PKM         | 58 kDa  | 4.42E+08 | 5.81E+08 | 4.25E+08 | NA       | NA       |
| sp Q8WZ4 Isoform 6 c TTN         | 632 kDa | 0        | 0        | 0        | NA       | NA       |
| sp Q9NZN: EH domain EHD3         | 61 kDa  | 1.65E+08 | 4.11E+08 | 2.27E+08 | NA       | NA       |
| sp P39060 Collagen al COL18A1    | 178 kDa | 1.64E+08 | 1.65E+08 | 1.67E+08 | NA       | NA       |
| sp Q5VTE0 Putative elk EEF1A1P5  | 50 kDa  | 4.17E+08 | 5.37E+08 | 4.97E+08 | NA       | NA       |
| sp O00159 Unconvent MYO1C        | 122 kDa | 87900000 | 1.76E+08 | 1.29E+08 | NA       | NA       |
| sp Q96AC1 Fermitin fa FERMT2     | 78 kDa  | 96600000 | 1.75E+08 | 1.63E+08 | NA       | NA       |
| sp P35580 Isoform 2 c MYH10      | 231 kDa | 2.87E+08 | 4.26E+08 | 4.33E+08 | NA       | NA       |
| sp Q05682 Caldesmon CALD1        | 93 kDa  | 1.77E+08 | 2.33E+08 | 1.79E+08 | NA       | NA       |
| sp P68871 Hemoglobi HBB          | 16 kDa  | 3.14E+08 | 4.72E+08 | 3.37E+08 | NA       | NA       |
| sp P50395 Rab GDP di GDI2        | 51 kDa  | 91600000 | 1.52E+08 | 87600000 | NA       | NA       |
| sp P05023 Isoform 3 c ATP1A1     | 110 kDa | 74700000 | 1.61E+08 | 94900000 | NA       | NA       |
| sp P04075 Isoform 2 c ALDOA      | 45 kDa  | 1.92E+08 | 2.52E+08 | 2.25E+08 | NA       | NA       |
| sp P10909 Isoform 5 c CLU        | 54 kDa  | 1.46E+08 | 2.76E+08 | 1.42E+08 | NA       | NA       |



|             |                      |         |          |          |          |    |    |
|-------------|----------------------|---------|----------|----------|----------|----|----|
| sp Q27J81   | Inverted fo INF2     | 136 kDa | 16300000 | 45800000 | 32600000 | NA | NA |
| sp P31946   | Isoform Sh YWHAB     | 28 kDa  | 1.75E+08 | 2.59E+08 | 3.05E+08 | NA | NA |
| sp Q9Y281   | Isoform 3 c CFL2     | 17 kDa  | 2.62E+08 | 3.64E+08 | 2.41E+08 | NA | NA |
| sp O75369   | Isoform 8 c FLNB     | 282 kDa | 65700000 | 1.27E+08 | 55600000 | NA | NA |
| sp P02458   | Collagen al COL2A1   | 142 kDa | 0        | 0        | 0        | NA | NA |
| sp A6NIZ1   | Ras-related RP1BL    | 21 kDa  | 61900000 | 59700000 | 45400000 | NA | NA |
| sp P06756   | Integrin al ITGAV    | 116 kDa | 38500000 | 66700000 | 33900000 | NA | NA |
| sp Q14240   | Eukaryotic EIF4A2    | 46 kDa  | 40400000 | 74100000 | 93200000 | NA | NA |
| sp P23142   | Fibulin-1 FBLN1      | 77 kDa  | 43400000 | 46400000 | 54700000 | NA | NA |
| sp Q15599   | Isoform 2 c SLC9A3R2 | 36 kDa  | 77300000 | 52600000 | 42800000 | NA | NA |
| tr C9JMN2   | Collagen al COL11A1  | 62 kDa  | 0        | 0        | 0        | NA | NA |
| sp P61204   | ADP-ribosy ARF3      | 21 kDa  | 26100000 | 31800000 | 16600000 | NA | NA |
| tr M0QZM    | Heterogen HNRNPM     | 40 kDa  | 19300000 | 6576500  | 15600000 | NA | NA |
| sp CATA_H   | sp CATA_H CATA       | 60 kDa  | 35200000 | 43500000 | 20400000 | NA | NA |
| sp P05997   | Collagen al COL5A2   | 145 kDa | 0        | 0        | 0        | NA | NA |
| sp CAH2_F   | sp CAH2_F CAH2       | 29 kDa  | 1.83E+08 | 1.97E+08 | 1.99E+08 | NA | NA |
| sp Q15084   | Isoform 4 c PDIA6    | 49 kDa  | 34100000 | 72500000 | 40700000 | NA | NA |
| sp Q68CZ2   | Isoform 2 c TNS3     | 129 kDa | 63400000 | 68400000 | 47500000 | NA | NA |
| tr J9JID7 J | Lamin B2, i LMNB2    | 70 kDa  | 11200000 | 42100000 | 46200000 | NA | NA |
| tr A6NCT7   | Collagen al COL16A1  | 97 kDa  | 0        | 0        | 0        | NA | NA |
| sp P04899   | Isoform sG I GNAI2   | 42 kDa  | 40300000 | 54200000 | 41900000 | NA | NA |
| sp P47756   | Isoform 2 c CAPZB    | 31 kDa  | 74200000 | 1.21E+08 | 8.70E+07 | NA | NA |
| sp P51991   | Heterogen HNRNPA3    | 40 kDa  | 53200000 | 97800000 | 73200000 | NA | NA |
| sp Q9UJU6   | Drebrin-lik DBNL     | 48 kDa  | 28400000 | 28300000 | 26800000 | NA | NA |
| tr A0A087   | Ig gamma- IGHG1      | 51 kDa  | 1.71E+08 | 2.18E+08 | 1.84E+08 | NA | NA |
| sp P00387   | Isoform 2 c CYB5R3   | 32 kDa  | 4.10E+07 | 92100000 | 6.30E+07 | NA | NA |
| tr G3V192   | Ferritin FTH1        | 18 kDa  | 0        | 5571100  | 0        | NA | NA |
| sp P06748   | Isoform 2 c NPM1     | 29 kDa  | 36500000 | 70800000 | 9838000  | NA | NA |
| sp O60506   | Isoform 3 c SYNCRIP  | 63 kDa  | 21900000 | 26300000 | 19800000 | NA | NA |
| sp Q15746   | Isoform 2 c MYLK     | 203 kDa | 23900000 | 41700000 | 33400000 | NA | NA |
| sp Q86VP6   | Cullin-assoc CAND1   | 136 kDa | 4536500  | 3907200  | 3729900  | NA | NA |
| sp Q00839   | Heterogen HNRNPU     | 91 kDa  | 5.70E+07 | 97100000 | 62600000 | NA | NA |
| sp Q9UPA5   | Protein bas BSN      | 416 kDa | 0        | 0        | 0        | NA | NA |
| sp Q9H2D6   | TRIO and F- TRIOBP   | 261 kDa | 0        | 0        | 0        | NA | NA |
| sp P48634   | Isoform 3 c PRRC2A   | 229 kDa | 0        | 0        | 0        | NA | NA |
| sp P05141   | ADP/ATP tr SLC25A5   | 33 kDa  | 33700000 | 85100000 | 45700000 | NA | NA |
| tr H7BY57   | Neurofascii NFASC    | 117 kDa | 13500000 | 28400000 | 28800000 | NA | NA |
| sp Q8IVF2   | Isoform 3 c AHNAK2   | 606 kDa | 0        | 0        | 0        | NA | NA |
| tr H0Y5N9   | Collagen al COL12A1  | 80 kDa  | 0        | 0        | 0        | NA | NA |
| sp Q86UL8   | Membrane MAGI2       | 159 kDa | 14400000 | 33200000 | 16900000 | NA | NA |
| sp Q8NEZ4   | Isoform 3 c KMT2C    | 548 kDa | 0        | 0        | 0        | NA | NA |
| sp Q13561   | Dynactin s DCTN2     | 44 kDa  | 7214600  | 19300000 | 18400000 | NA | NA |
| sp P30044   | Peroxiredo PRDX5     | 22 kDa  | 30200000 | 47600000 | 24600000 | NA | NA |
| sp P19013   | Keratin, ty KRT4     | 57 kDa  | 4.60E+08 | 67600000 | 1.09E+08 | NA | NA |
| sp Q9UQ33   | Serine/argi SRRM2    | 300 kDa | 0        | 0        | 0        | NA | NA |
| tr A0A087   | Immunogl IGLL5       | 25 kDa  | 4.80E+07 | 48800000 | 62100000 | NA | NA |
| tr E9PBC6   | Transformi TACC2     | 303 kDa | 0        | 0        | 0        | NA | NA |

|            |                      |         |          |          |          |    |    |
|------------|----------------------|---------|----------|----------|----------|----|----|
| sp Q12955  | Ankyrin-3 ANK3       | 480 kDa | 0        | 0        | 0        | NA | NA |
| sp P20929  | Isoform 2 c NEB      | 987 kDa | 0        | 0        | 0        | NA | NA |
| sp O00429  | Isoform 2 c DNM1L    | 79 kDa  | 7900800  | 8258300  | 3877200  | NA | NA |
| sp P22392  | Isoform 3 c NME2     | 30 kDa  | 37900000 | 53700000 | 41100000 | NA | NA |
| sp Q8WUUN  | Programme PDCD6IP    | 96 kDa  | 16100000 | 24400000 | 18300000 | NA | NA |
| sp O14686  | Histone-lys KMT2D    | 593 kDa | 0        | 0        | 0        | NA | NA |
| sp P59665  | Neutrophil DEFA1     | 10 kDa  | 42600000 | 98300000 | 45800000 | NA | NA |
| sp P49748  | Isoform 3 c ACADVL   | 73 kDa  | 23900000 | 36900000 | 26500000 | NA | NA |
| sp P17813  | Endoglin ENG         | 71 kDa  | 8390300  | 2.40E+07 | 1.50E+07 | NA | NA |
| sp Q9NR12  | PDZ and LIF PDLIM7   | 50 kDa  | 9904900  | 20900000 | 2.20E+07 | NA | NA |
| tr E9PCA1  | T-complex CCT5       | 57 kDa  | 7263600  | 7889700  | 9907800  | NA | NA |
| sp P13804  | Electron tr: ETFA    | 35 kDa  | 22600000 | 21300000 | 18200000 | NA | NA |
| sp Q17RW   | Collagen al: COL24A1 | 175 kDa | 0        | 0        | 0        | NA | NA |
| sp O75955  | Isoform 2 c FLOT1    | 42 kDa  | 4281200  | 11300000 | 7749700  | NA | NA |
| sp Q13642  | Isoform 1 c FHL1     | 32 kDa  | 27400000 | 44900000 | 37500000 | NA | NA |
| sp Q9P2P6  | StAR-relate STARD9   | 516 kDa | 0        | 0        | 0        | NA | NA |
| sp Q7Z4I7  | Isoform 2 c LIMS2    | 42 kDa  | 6518700  | 6831800  | 12600000 | NA | NA |
| sp P20810  | Calpastatin CAST     | 77 kDa  | 1.20E+07 | 21400000 | 14600000 | NA | NA |
| tr A0A0A0I | Protein-L-is PCMT1   | 30 kDa  | 5133100  | 24600000 | 15300000 | NA | NA |
| sp P31040  | Succinate c SDHA     | 73 kDa  | 1878600  | 10800000 | 6217900  | NA | NA |
| sp P63244  | Guanine nu: GNB2L1   | 35 kDa  | 0        | 35400000 | 29600000 | NA | NA |
| sp P07602  | Isoform Sa: PSAP     | 58 kDa  | 831390   | 294800   | 216710   | NA | NA |
| sp Q14055  | Collagen al: COL9A2  | 65 kDa  | 66600000 | 0        | 0        | NA | NA |
| sp P28799  | Isoform 2 c GRN      | 47 kDa  | 0        | 0        | 11800000 | NA | NA |
| sp Q7Z5J4  | Retinoic ac RAI1     | 203 kDa | 10900000 | 0        | 0        | NA | NA |
| sp Q01844  | Isoform 3 c EWSR1    | 68 kDa  | 11100000 | 0        | 0        | NA | NA |
| sp Q9P2E9  | Ribosome-I RRBP1     | 152 kDa | 7739200  | 20400000 | 9262700  | NA | NA |
| tr Q5STU3  | Spliceosom DDX39B    | 49 kDa  | 15300000 | 38600000 | 19200000 | NA | NA |
| sp Q6KB66  | Keratin, ty: KRT80   | 51 kDa  | 0        | 0        | 34800000 | NA | NA |
| sp Q03001  | Dystonin DST         | 861 kDa | 0        | 0        | 0        | NA | NA |
| sp Q14103  | Isoform 3 c HNRNPD   | 33 kDa  | 6439000  | 9868200  | 6964800  | NA | NA |
| tr H0Y586  | Proteasom PSMA7      | 21 kDa  | 1.00E+07 | 1.00E+07 | 5671300  | NA | NA |
| sp P29692  | Isoform 2 c EEF1D    | 71 kDa  | 4167400  | 7585000  | 6264400  | NA | NA |
| sp Q07020  | Isoform 2 c RPL18    | 18 kDa  | 0        | 8848000  | 21900000 | NA | NA |
| sp Q6ZVM   | Isoform 5 c TOM1L2   | 53 kDa  | 5523400  | 575660   | 482740   | NA | NA |
| sp Q13263  | Transcripti TRIM28   | 89 kDa  | 8383500  | 16500000 | 21500000 | NA | NA |
| sp O94850  | Dendrin DDN          | 76 kDa  | 0        | 0        | 13800000 | NA | NA |
| sp Q5T4S7  | Isoform 2 c UBR4     | 576 kDa | 729820   | 897060   | 276480   | NA | NA |
| sp Q86UX2  | Isoform 2 c ITIH5    | 77 kDa  | 4212600  | 8193200  | 4154300  | NA | NA |
| sp P30085  | UMP-CMP CMPK1        | 22 kDa  | 8064300  | 12700000 | 10800000 | NA | NA |
| sp Q96L91  | Isoform 3 c EP400    | 336 kDa | 0        | 0        | 0        | NA | NA |
| sp Q9NU2   | Midasin MDN1         | 633 kDa | 0        | 0        | 0        | NA | NA |
| sp Q2LD37  | Isoform 4 c KIAA1109 | 555 kDa | 0        | 0        | 0        | NA | NA |
| sp P11940  | Isoform 2 c PABPC1   | 61 kDa  | 0        | 8370800  | 7995400  | NA | NA |
| sp P51659  | Isoform 2 c HSD17B4  | 83 kDa  | 14400000 | 3.00E+07 | 25100000 | NA | NA |
| sp P78527  | Isoform 2 c PRKDC    | 466 kDa | 0        | 1583200  | 0        | NA | NA |
| sp O00401  | Neural Wis WASL      | 55 kDa  | 817000   | 1882800  | 0        | NA | NA |

|                                |         |          |          |          |    |    |
|--------------------------------|---------|----------|----------|----------|----|----|
| sp Q5QGS  Protein KIA KIAA2022 | 168 kDa | 0        | 0        | 0        | NA | NA |
| sp P09960  Isoform 2 c LTA4H   | 60 kDa  | 17800000 | 13500000 | 15700000 | NA | NA |
| sp P20711  Isoform 2 c DDC     | 37 kDa  | 8370200  | 8172400  | 7780000  | NA | NA |
| tr Q5STX8  Allograft in AIF1   | 18 kDa  | 3960100  | 0        | 3150300  | NA | NA |
| sp P49023  Paxillin PXN        | 65 kDa  | 11100000 | 18600000 | 1.40E+07 | NA | NA |
| sp Q16851  Isoform 2 c UGP2    | 56 kDa  | 12800000 | 7347700  | 5044500  | NA | NA |
| tr B1ALD9  Periostin POSTN     | 90 kDa  | 0        | 0        | 1165300  | NA | NA |
| sp P0DME  Protein SET SETSIP   | 35 kDa  | 4447300  | 5393600  | 0        | NA | NA |
| sp P55084  Trifunction HADHB   | 51 kDa  | 0        | 18500000 | 7922300  | NA | NA |
| sp Q96L96  Alpha-prot ALPK3    | 201 kDa | 0        | 0        | 0        | NA | NA |
| tr Q5W0X  Peptidyl-pr FKBP1A   | 11 kDa  | 0        | 0        | 9956800  | NA | NA |
| sp Q16787  Laminin sul LAMA3   | 367 kDa | 19800000 | 26300000 | 23300000 | NA | NA |
| sp O14617  Isoform 5 c AP3D1   | 137 kDa | 1849400  | 6356700  | 1936500  | NA | NA |
| sp Q9NZM  Isoform 2 c MYOF     | 230 kDa | 4772600  | 16600000 | 4397000  | NA | NA |
| sp Q15233  Non-POU d NONO      | 54 kDa  | 5121300  | 8395300  | 7628300  | NA | NA |
| sp Q86TX2  Acyl-coenz ACOT1    | 46 kDa  | 14200000 | 11400000 | 12100000 | NA | NA |
| sp P09622  Isoform 2 c DLD     | 44 kDa  | 5139100  | 18600000 | 0        | NA | NA |
| sp Q9NQX  Isoform 2 c GPHN     | 83 kDa  | 3879800  | 0        | 0        | NA | NA |
| sp P16615  Sarcoplasm ATP2A2   | 115 kDa | 5842300  | 1691500  | 2937000  | NA | NA |
| tr E7EVG6  Peroxisome PPRC1    | 149 kDa | 0        | 0        | 0        | NA | NA |
| sp P22531  Small prolir SPRR2E | 8 kDa   | 0        | 0        | 0        | NA | NA |
| sp P19971  Thymidine TYMP      | 50 kDa  | 1119200  | 6937900  | 1356700  | NA | NA |
| sp Q9P0K7  Isoform 4 c RAI14   | 107 kDa | 1665800  | 6166600  | 5143400  | NA | NA |
| sp P35749  Isoform 2 c MYH11   | 228 kDa | 3.76E+08 | 5.79E+08 | 5.00E+08 | NA | NA |
| sp Q9H0W  Isoform 2 c C11orf54 | 33 kDa  | 0        | 0        | 0        | NA | NA |
| tr H0Y9Y3  Synaptopor SYNPO2   | 125 kDa | 0        | 14400000 | 0        | NA | NA |
| sp Q9BXM  Periaxin PRX         | 155 kDa | 0        | 0        | 0        | NA | NA |
| tr H3BPE7  RNA-bindin FUS      | 53 kDa  | 12700000 | 19300000 | 10800000 | NA | NA |
| sp P19838  Isoform 2 c NFKB1   | 105 kDa | 0        | 0        | 0        | NA | NA |
| sp Q16610  Isoform 2 c ECM1    | 46 kDa  | 0        | 0        | 0        | NA | NA |
| sp O43399  Isoform 4 c TPD52L2 | 21 kDa  | 3865400  | 5019300  | 3375100  | NA | NA |
| sp Q96IZ0  PRKC apop PAWR      | 37 kDa  | 5169800  | 2838800  | 0        | NA | NA |
| sp P25786  Isoform Lor PSMA1   | 30 kDa  | 0        | 0        | 0        | NA | NA |
| sp Q9BQG  Isoform 2 c MYBBP1A  | 149 kDa | 0        | 0        | 0        | NA | NA |
| sp Q9H8L6  Multimerin MMRN2    | 104 kDa | 5986500  | 0        | 3481500  | NA | NA |
| sp Q8NDA  Hemicentir HMCN2     | 543 kDa | 0        | 0        | 0        | NA | NA |
| sp Q92841  Probable A DDX17    | 80 kDa  | 13600000 | 14300000 | 11700000 | NA | NA |
| sp P02787  Serotransfe TF      | 77 kDa  | 0        | 0        | 5225300  | NA | NA |
| sp P40121  Isoform 2 c CAPG    | 37 kDa  | 6985900  | 9043100  | 6805800  | NA | NA |
| sp P62847  40S ribosor RPS24   | 15 kDa  | 1800600  | 2045000  | 0        | NA | NA |
| tr J3KTF8  Rho GDP-d ARHGDI A  | 22 kDa  | 11300000 | 18500000 | 0        | NA | NA |
| tr H0YMM  Papilin (Fra PAPLN   | 33 kDa  | 489610   | 467720   | 359120   | NA | NA |
| tr A0A0A0  Protein ND NDRG2    | 40 kDa  | 0        | 9032500  | 0        | NA | NA |
| sp Q13510  Acid ceram ASAH1    | 45 kDa  | 0        | 0        | 0        | NA | NA |
| sp Q12906  Isoform 2 c ILF3    | 76 kDa  | 3555000  | 5836500  | 6001700  | NA | NA |
| sp Q9C098  Serine/thre DCLK3   | 74 kDa  | 0        | 0        | 0        | NA | NA |
| sp P34913  Bifunctiona EPHX2   | 63 kDa  | 5195300  | 0        | 5369500  | NA | NA |

|                               |         |          |          |          |    |    |
|-------------------------------|---------|----------|----------|----------|----|----|
| sp Q5VT97 Rho GTPase SYDE2    | 133 kDa | 0        | 0        | 0        | NA | NA |
| tr C9J406  MIC compl IMM      | 73 kDa  | 4367400  | 10100000 | 4398100  | NA | NA |
| sp P55209 Isoform 2 c NAP1L1  | 43 kDa  | 5063000  | 5356800  | 4902200  | NA | NA |
| sp P38117 Electron tra ETFB   | 28 kDa  | 21700000 | 24200000 | 21600000 | NA | NA |
| sp P29508 Serpin B3 SERPINB3  | 45 kDa  | 0        | 0        | 0        | NA | NA |
| sp P10155 Isoform 4 c TROVE2  | 60 kDa  | 2948300  | 6519500  | 5414100  | NA | NA |
| sp P06737 Isoform 2 c PYGL    | 93 kDa  | 488390   | 9355600  | 7558700  | NA | NA |
| sp Q9BUT1 Isoform 2 c BDH2    | 19 kDa  | 1080600  | 765130   | 627410   | NA | NA |
| tr K7EQ16 UV excisor RAD23A   | 17 kDa  | 466030   | 294860   | 0        | NA | NA |
| sp P13688 Isoform 10 CEACAM1  | 51 kDa  | 4196600  | 7983400  | 0        | NA | NA |
| sp Q12967 Isoform 2 c RALGDS  | 105 kDa | 0        | 0        | 0        | NA | NA |
| sp Q14152 Eukaryotic EIF3A    | 167 kDa | 0        | 1865000  | 0        | NA | NA |
| sp O60749 Sorting nex SNX2    | 58 kDa  | 4903700  | 7543600  | 5957400  | NA | NA |
| sp Q15847 Adipogene: ADIRF    | 8 kDa   | 0        | 0        | 0        | NA | NA |
| sp Q6UB95 Ankyrin re ANKRD11  | 298 kDa | 0        | 0        | 0        | NA | NA |
| sp Q13228 Selenium-b SELENBP1 | 52 kDa  | 0        | 0        | 0        | NA | NA |
| sp Q7Z7H5 Isoform 2 c TMED4   | 24 kDa  | 0        | 0        | 0        | NA | NA |
| sp Q6XQN1 Isoform 2 c NAPRT   | 60 kDa  | 2767600  | 932760   | 768290   | NA | NA |
| sp Q9ULV4 Isoform 2 c CORO1C  | 54 kDa  | 3784100  | 6251600  | 4918900  | NA | NA |
| sp P62195 26S protea: PSMC5   | 46 kDa  | 0        | 0        | 0        | NA | NA |
| sp Q8TCD5 Isoform 2 c NT5C    | 13 kDa  | 0        | 875220   | 721950   | NA | NA |
| sp Q5H9U5 Probable A DDX60L   | 198 kDa | 0        | 0        | 0        | NA | NA |
| sp A7E2Y1 Myosin-7B MYH7B     | 221 kDa | 13800000 | 0        | 2.00E+07 | NA | NA |
| sp Q16775 Hydroxyacy HAGH     | 34 kDa  | 0        | 0        | 0        | NA | NA |
| sp O43852 Isoform 3 c CALU    | 38 kDa  | 0        | 0        | 8883000  | NA | NA |
| sp P14868 Isoform 2 c DARS    | 46 kDa  | 7765700  | 8031500  | 6817100  | NA | NA |
| sp Q9BPX5 Actin-relate ARPC5L | 17 kDa  | 0        | 916890   | 0        | NA | NA |
| sp Q9H4A2 Aminopept RNPEP     | 73 kDa  | 0        | 0        | 4459600  | NA | NA |
| sp P18084 Integrin be ITGB5   | 88 kDa  | 0        | 5914000  | 0        | NA | NA |
| sp P21964 Catechol O COMT     | 30 kDa  | 1005300  | 0        | 2388000  | NA | NA |
| sp Q5U651 Ras-interac RASIP1  | 103 kDa | 0        | 0        | 0        | NA | NA |
| sp O75340 Isoform 2 c PDCD6   | 22 kDa  | 2683000  | 0        | 2803900  | NA | NA |
| sp P21810 Biglycan BGN        | 42 kDa  | 2365700  | 2.00E+07 | 3533300  | NA | NA |
| sp P51608 Isoform B c MECP2   | 53 kDa  | 0        | 0        | 0        | NA | NA |
| sp Q96QR5 Transcriptio PURB   | 33 kDa  | 0        | 4275600  | 2228700  | NA | NA |
| tr H0Y8X4 2'-deoxynu DNP1     | 26 kDa  | 6058000  | 0        | 0        | NA | NA |
| sp Q5T0Z8 Uncharacte C6orf132 | 124 kDa | 0        | 0        | 0        | NA | NA |
| sp Q12802 A-kinase ar AKAP13  | 308 kDa | 0        | 3003200  | 0        | NA | NA |
| sp P08603 Compleme CFH        | 139 kDa | 0        | 0        | 0        | NA | NA |
| sp Q92734 Isoform 2 c TFG     | 43 kDa  | 0        | 0        | 0        | NA | NA |
| sp Q86WA Valacyclovi BPHL     | 33 kDa  | 4848600  | 3383700  | 3335200  | NA | NA |
| sp Q14980 Isoform Nu NUMA1    | 201 kDa | 603300   | 603550   | 437050   | NA | NA |
| sp P46776 60S ribosor RPL27A  | 17 kDa  | 7428800  | 11800000 | 8733900  | NA | NA |
| sp Q96AP7 Endothelial ESAM    | 41 kDa  | 6424800  | 8395900  | 0        | NA | NA |
| sp P04196 Histidine-ri HRG    | 60 kDa  | 1283300  | 1496000  | 1611400  | NA | NA |
| sp Q2M3C Isoform 2 c C15orf27 | 54 kDa  | 373750   | 459190   | 0        | NA | NA |
| sp P28482 Mitogen-ac MAPK1    | 41 kDa  | 4488900  | 9105900  | 9968300  | NA | NA |

|                                         |         |          |          |          |    |    |
|-----------------------------------------|---------|----------|----------|----------|----|----|
| sp O95571 Persulfide c ETHE1            | 28 kDa  | 3430600  | 5952600  | 0        | NA | NA |
| sp P35998 Isoform 2 c PSMC2             | 33 kDa  | 5782400  | 0        | 17700000 | NA | NA |
| sp P35606 Isoform 2 c COPB2             | 99 kDa  | 0        | 3278700  | 5782600  | NA | NA |
| sp A7MCYf TANK-bindin TBKBP1            | 68 kDa  | 0        | 0        | 0        | NA | NA |
| tr F2Z2V0  Copine-1 (F CPNE1            | 59 kDa  | 417660   | 0        | 0        | NA | NA |
| sp P29992 Guanine nucleoside GNA11      | 42 kDa  | 6137300  | 8522100  | 6266100  | NA | NA |
| sp P46937 Isoform 9 c YAP1              | 55 kDa  | 0        | 0        | 0        | NA | NA |
| sp O94762 ATP-dependent RECQL5          | 109 kDa | 0        | 0        | 0        | NA | NA |
| sp P54578 Ubiquitin c USP14             | 56 kDa  | 0        | 920770   | 1691100  | NA | NA |
| sp Q9BTV4 Transmembrane TMEM43          | 45 kDa  | 0        | 3092700  | 5837100  | NA | NA |
| sp Q9HCMf Fibrosin-1-like FBRSL1        | 111 kDa | 0        | 0        | 0        | NA | NA |
| sp Q04837 Single-strand SSBP1           | 17 kDa  | 0        | 0        | 0        | NA | NA |
| sp P43307 Isoform 2 c SSR1              | 29 kDa  | 2129400  | 6392900  | 1945200  | NA | NA |
| sp Q9UKXf Myosin-13 MYH13               | 224 kDa | 13800000 | 0        | 2.00E+07 | NA | NA |
| sp Q9UQ8f Isoform 2 c PA2G4             | 38 kDa  | 3995500  | 6482600  | 5565700  | NA | NA |
| sp P27635 60S ribosomal RPL10           | 25 kDa  | 0        | 7854800  | 1768000  | NA | NA |
| sp Q15642 Cdc42-interacting TRIP10      | 68 kDa  | 450310   | 0        | 0        | NA | NA |
| sp P60903 Protein S1C S100A10           | 11 kDa  | 0        | 0        | 0        | NA | NA |
| sp P62995 Transformed TRA2B             | 34 kDa  | 0        | 0        | 0        | NA | NA |
| sp Q10589 Isoform 2 c BST2              | 18 kDa  | 5730400  | 12100000 | 11200000 | NA | NA |
| sp O95886 Disks large-like DLGAP3       | 106 kDa | 7066200  | 0        | 0        | NA | NA |
| sp P54819 Isoform 6 c AK2               | 22 kDa  | 0        | 0        | 0        | NA | NA |
| sp Q15436 Protein transmembrane SEC23A  | 86 kDa  | 0        | 0        | 0        | NA | NA |
| sp Q15654 Thyroid receptor TRIP6        | 50 kDa  | 0        | 0        | 8433700  | NA | NA |
| sp Q14257 Isoform 2 c RCN2              | 39 kDa  | 0        | 2949000  | 2210300  | NA | NA |
| sp Q15075 Early endosome EEA1           | 162 kDa | 0        | 0        | 0        | NA | NA |
| sp Q92896 Isoform 2 c GLG1              | 137 kDa | 0        | 0        | 0        | NA | NA |
| sp P48637 Glutathione S-transferase GSS | 52 kDa  | 0        | 0        | 0        | NA | NA |
| sp P01112 GTPase HR23B HRAS             | 21 kDa  | 0        | 0        | 0        | NA | NA |
| tr A0A087  Sorting nexin SNX12          | 20 kDa  | 0        | 0        | 8125200  | NA | NA |
| sp Q92833 Protein Jun JARID2            | 139 kDa | 0        | 0        | 0        | NA | NA |
| tr E9PM76 Sulfotransferase SULT1A2      | 24 kDa  | 8229900  | 11100000 | 11300000 | NA | NA |
| sp P80723 Brain acid sialic acid BASP1  | 23 kDa  | 0        | 0        | 0        | NA | NA |
| sp Q99729 Isoform 2 c HNRNPAB           | 36 kDa  | 0        | 0        | 3992700  | NA | NA |
| sp P01023 Alpha-2-macroglobulin A2M     | 163 kDa | 1375400  | 2168200  | 0        | NA | NA |
| sp P62826 GTP-binding RAN               | 24 kDa  | 1244300  | 0        | 0        | NA | NA |
| sp Q15185 Isoform 3 c PTGES3            | 15 kDa  | 0        | 0        | 0        | NA | NA |
| sp P11498 Pyruvate carboxylase PC       | 130 kDa | 0        | 692790   | 724660   | NA | NA |
| sp Q16643 Isoform 2 c DBN1              | 72 kDa  | 0        | 0        | 0        | NA | NA |
| tr F8VVD5 2-methoxy-CoQ5                | 10 kDa  | 0        | 0        | 0        | NA | NA |
| sp P08237 Isoform 2 c PFKM              | 82 kDa  | 0        | 1729800  | 677550   | NA | NA |
| sp Q96AJ9 Isoform 1 c VTI1A             | 23 kDa  | 2080400  | 0        | 5218900  | NA | NA |
| sp P61457 Pterin-4-aldolase PCBD1       | 12 kDa  | 0        | 0        | 0        | NA | NA |
| sp Q9BS26 Endoplasmic reticulum ERP44   | 47 kDa  | 0        | 3789100  | 2628000  | NA | NA |
| sp Q14258 E3 ubiquitin TRIM25           | 71 kDa  | 0        | 0        | 0        | NA | NA |
| sp P16219 Short-chain ACADS             | 44 kDa  | 0        | 1136200  | 0        | NA | NA |
| sp P36871 Phosphoglucomutase PGM1       | 61 kDa  | 1553400  | 6442100  | 0        | NA | NA |

|                               |         |          |          |          |    |    |
|-------------------------------|---------|----------|----------|----------|----|----|
| tr H0YIZ1  Epididymal NPC2    | 19 kDa  | 0        | 0        | 0        | NA | NA |
| sp Q08722 Isoform OA CD47     | 32 kDa  | 9587100  | 0        | 11300000 | NA | NA |
| sp P26196 Probable A DDX6     | 54 kDa  | 0        | 4680100  | 0        | NA | NA |
| sp Q5T7P3 Late cornifi LCE1B  | 12 kDa  | 0        | 0        | 0        | NA | NA |
| sp A4D1E1 Zinc finger ZNF804B | 153 kDa | 0        | 0        | 0        | NA | NA |
| sp P62857 40S ribosor RPS28   | 8 kDa   | 0        | 0        | 0        | NA | NA |
| sp A4D0S4 Isoform 3 c LAMB4   | 189 kDa | 0        | 0        | 0        | NA | NA |
| sp Q9P219 Protein Da; CCDC88C | 228 kDa | 4015600  | 0        | 0        | NA | NA |
| sp Q9NPH; Inositol-3-φ ISYNA1 | 61 kDa  | 1095600  | 6601300  | 928960   | NA | NA |
| sp P0DJ19  Serum amy SAA2     | 14 kDa  | 7210200  | 8577900  | 6338700  | NA | NA |
| sp P18859 Isoform 2 c ATP5J   | 13 kDa  | 0        | 0        | 0        | NA | NA |
| sp Q8N16; Isoform 2 c CCAR2   | 103 kDa | 0        | 0        | 0        | NA | NA |
| sp P10398 Serine/thre ARAF    | 68 kDa  | 0        | 0        | 0        | NA | NA |
| sp P17844 Probable A DDX5     | 69 kDa  | 0        | 7890100  | 1304600  | NA | NA |
| sp P36507 Dual specif MAP2K2  | 44 kDa  | 0        | 519470   | 0        | NA | NA |
| sp P11413; Isoform 3 c G6PD   | 62 kDa  | 2555200  | 1699700  | 0        | NA | NA |
| sp Q9Y2Q; Isoform 2 c GSTK1   | 32 kDa  | 0        | 0        | 0        | NA | NA |
| sp Q92973 Isoform 2 c TNPO1   | 101 kDa | 2859400  | 0        | 3748500  | NA | NA |
| sp Q9BUP; Isoform 2 c EFHD1   | 16 kDa  | 1097200  | 1635400  | 976500   | NA | NA |
| sp P35916 Isoform 2 c FLT4    | 146 kDa | 0        | 0        | 3246300  | NA | NA |
| sp Q9H211 DNA replic; CDT1    | 60 kDa  | 0        | 0        | 0        | NA | NA |
| sp P83731 60S ribosor RPL24   | 18 kDa  | 0        | 0        | 0        | NA | NA |
| sp P11217 Glycogen p PYGM     | 97 kDa  | 0        | 8651500  | 7013700  | NA | NA |
| sp P62266 40S ribosor RPS23   | 16 kDa  | 0        | 0        | 0        | NA | NA |
| sp Q93009 Isoform 3 c USP7    | 126 kDa | 6224700  | 0        | 0        | NA | NA |
| sp Q5TFQ; Signal-regu SIRPB1  | 43 kDa  | 0        | 0        | 0        | NA | NA |
| sp P19961 Alpha-amyl AMY2B    | 58 kDa  | 0        | 0        | 0        | NA | NA |
| sp O76041 Nebulette NEBL      | 116 kDa | 35500000 | 4.60E+07 | 35400000 | NA | NA |
| sp P30046 D-dopachrc DDT      | 13 kDa  | 0        | 0        | 0        | NA | NA |
| sp O14633 Late cornifi LCE2B  | 11 kDa  | 0        | 0        | 0        | NA | NA |
| sp Q16795 NADH dehy; NDUFA9   | 43 kDa  | 0        | 913570   | 0        | NA | NA |
| sp P32754 Isoform 2 c HPD     | 40 kDa  | 0        | 14900000 | 0        | NA | NA |
| sp Q9Y5Z4 Isoform 2 c HEBP2   | 21 kDa  | 0        | 0        | 0        | NA | NA |
| sp O95433 Isoform 2 c AHSA1   | 32 kDa  | 0        | 0        | 0        | NA | NA |
| sp Q13596 Isoform 1A SNX1     | 52 kDa  | 1833400  | 6491500  | 6464300  | NA | NA |
| sp Q14677 Isoform 3 c CLINT1  | 70 kDa  | 0        | 0        | 1966700  | NA | NA |
| sp Q92820 Gamma-glu GGH       | 36 kDa  | 0        | 0        | 0        | NA | NA |
| sp O94925 Isoform 3 c GLS     | 65 kDa  | 0        | 0        | 0        | NA | NA |
| sp Q13162 Peroxiredo; PRDX4   | 31 kDa  | 3158800  | 7057700  | 0        | NA | NA |
| sp Q16629 Isoform 2 c SRSF7   | 16 kDa  | 0        | 18300000 | 5154500  | NA | NA |
| sp P62244 40S ribosor RPS15A  | 15 kDa  | 0        | 3883200  | 2910400  | NA | NA |
| sp Q13526 Peptidyl-pr PIN1    | 18 kDa  | 0        | 0        | 0        | NA | NA |
| sp Q9BTT0 Acidic leuci ANP32E | 31 kDa  | 0        | 0        | 0        | NA | NA |
| sp Q9NVJ2 ADP-ribosy ARL8B    | 22 kDa  | 0        | 0        | 0        | NA | NA |
| sp Q13103 Secreted pl SPP2    | 24 kDa  | 0        | 0        | 0        | NA | NA |
| sp O94760 N(G),N(G)-c DDAH1   | 31 kDa  | 0        | 0        | 0        | NA | NA |
| sp P14406 Cytochrom COX7A2    | 9 kDa   | 0        | 0        | 0        | NA | NA |

|           |              |          |         |          |          |          |          |          |
|-----------|--------------|----------|---------|----------|----------|----------|----------|----------|
| sp P25789 | Proteasom    | PSMA4    | 29 kDa  | 0        | 0        | 0        | NA       | NA       |
| sp Q15828 | Cystatin-M   | CST6     | 17 kDa  | 0        | 0        | 0        | NA       | NA       |
| sp Q13643 | Four and a   | FHL3     | 31 kDa  | 1452500  | 0        | 0        | NA       | NA       |
| sp O14594 | Neurocan c   | NCAN     | 143 kDa | 0        | 0        | 0        | NA       | NA       |
| sp P41218 | Myeloid ce   | MNDA     | 46 kDa  | 0        | 0        | 0        | NA       | NA       |
| sp O00231 | Isoform 2 c  | PSMD11   | 48 kDa  | 0        | 0        | 0        | NA       | NA       |
| sp P36543 | Isoform 2 c  | ATP6V1E1 | 24 kDa  | 0        | 0        | 0        | NA       | NA       |
| sp Q13057 | Isoform 2 c  | COASY    | 65 kDa  | 2196100  | 4915600  | 1340800  | NA       | NA       |
| tr E7EPV7 | Alpha-synu   | SNCA     | 12 kDa  | 0        | 0        | 0        | NA       | NA       |
| sp Q8WXE  | Isoform 2 c  | CASKIN2  | 118 kDa | 0        | 0        | 0        | NA       | NA       |
| sp O75348 | V-type prot  | ATP6V1G1 | 14 kDa  | 0        | 4065600  | 0        | NA       | NA       |
| tr HOYHD8 | Cysteine-ric | CRIP2    | 11 kDa  | 6.60E+07 | 82800000 | 5466800  | NA       | NA       |
| sp P30511 | Isoform 3 c  | HLA-F    | 50 kDa  | 2.10E+07 | 0        | 0        | NA       | NA       |
| sp Q9UBC  | Unconvent    | MYO1A    | 118 kDa | 0        | 0        | 0        | NA       | NA       |
| sp P12883 | Myosin-7     | MYH7     | 223 kDa | 0        | 0        | 0        | NA       | NA       |
| sp Q86YQ  | Copine-8     | CPNE8    | 63 kDa  | 2097100  | 2551300  | 2249500  | NA       | NA       |
| sp Q9NRX  | 14 kDa pho   | PHPT1    | 14 kDa  | 0        | 0        | 0        | NA       | NA       |
| sp Q6IAA8 | Ragulator c  | LAMTOR1  | 18 kDa  | 0        | 0        | 0        | NA       | NA       |
| sp O75594 | Peptidoglyc  | PGLYRP1  | 22 kDa  | 0        | 0        | 0        | NA       | NA       |
| sp P47985 | Cytochrom    | UQCRCF51 | 30 kDa  | 0        | 7213800  | 330210   | NA       | NA       |
| sp Q9P0L0 | Isoform 2 c  | VAPA     | 33 kDa  | 0        | 0        | 0        | NA       | NA       |
| sp O14979 | Isoform 2 c  | HNRNPDL  | 34 kDa  | 4191900  | 8105700  | 4472400  | NA       | NA       |
| sp P19652 | Alpha-1-aci  | ORM2     | 24 kDa  | 0        | 0        | 0        | NA       | NA       |
| sp Q13347 | Eukaryotic   | EIF3I    | 37 kDa  | 0        | 3557600  | 0        | NA       | NA       |
| sp P33241 | Isoform 3 c  | LSP1     | 50 kDa  | 0        | 0        | 0        | NA       | NA       |
| sp P30049 | ATP syntha   | ATP5D    | 17 kDa  | 0        | 0        | 0        | NA       | NA       |
| sp Q9BT88 | Synaptotag   | SYT11    | 48 kDa  | 0        | 0        | 0        | NA       | NA       |
| tr A0A087 | Ig mu chair  | IGHM     | 64 kDa  | 0        | 0        | 0        | NA       | NA       |
| sp P30039 | Isoform 2 c  | PBLD     | 31 kDa  | 0        | 0        | 0        | NA       | NA       |
| sp P27482 | Calmodulin   | CALML3   | 17 kDa  | 0        | 0        | 0        | NA       | NA       |
| sp Q9Y2B0 | Protein can  | CNPY2    | 21 kDa  | 0        | 0        | 0        | NA       | NA       |
| sp P04280 | Basic saliva | PRB1     | 39 kDa  | 0        | 0        | 0        | NA       | NA       |
| sp O75964 | ATP syntha   | ATP5L    | 11 kDa  | 0        | 0        | 0        | NA       | NA       |
| sp Q14576 | ELAV-like p  | ELAVL3   | 40 kDa  | 0        | 0        | 0        | NA       | NA       |
| sp Q14508 | WAP four-c   | WFDC2    | 13 kDa  | 0        | 0        | 0        | NA       | NA       |
| sp Q15758 | Neutral am   | SLC1A5   | 57 kDa  | 0        | 0        | 0        | NA       | NA       |
| sp P08590 | Myosin lig   | MYL3     | 22 kDa  | 36800000 | 59200000 | 55700000 | NA       | NA       |
| tr H3BUN4 | Nucleolar p  | NOL3     | 22 kDa  | 204370   | 145900   | 0        | NA       | NA       |
| sp Q8IWE  | Isoform 2 c  | FAM114A1 | 40 kDa  | 0        | 0        | 0        | NA       | NA       |
| sp P51153 | Ras-related  | RAB13    | 23 kDa  | 10300000 | 0        | 11500000 | NA       | NA       |
| tr Q60FE5 | Filamin A    | FLNA     | 278 kDa | NA       | NA       | NA       | 8.34E+08 | 1.80E+09 |
| sp P60709 | Actin, cyto  | ACTB     | 42 kDa  | NA       | NA       | NA       | 9.02E+09 | 1.64E+10 |
| sp Q71U3  | Tubulin alp  | TUBA1A   | 50 kDa  | NA       | NA       | NA       | 1.08E+09 | 1.71E+09 |
| sp P02671 | Isoform 2 c  | FGA      | 70 kDa  | NA       | NA       | NA       | 4.22E+08 | 5.26E+08 |
| sp Q00610 | Isoform 2 c  | CLTC     | 188 kDa | NA       | NA       | NA       | 1.24E+08 | 2.37E+08 |
| tr Q5T0I0 | Gelsolin (Fr | GSN      | 29 kDa  | NA       | NA       | NA       | 3.56E+08 | 5.96E+08 |
| sp P14618 | Pyruvate ki  | PKM      | 58 kDa  | NA       | NA       | NA       | 2.28E+08 | 3.70E+08 |

|                               |          |    |    |    |          |          |
|-------------------------------|----------|----|----|----|----------|----------|
| tr H0Y998 Collagen al COL4A5  | 12 kDa   | NA | NA | NA | 1.58E+08 | 8.73E+08 |
| sp Q8WZ4 Isoform 12 TTN       | 3994 kDa | NA | NA | NA | 69900    | 0        |
| sp Q07157 Tight juncti TJP1   | 195 kDa  | NA | NA | NA | 59200000 | 2.06E+08 |
| tr A0A024I EH domain- EHD1    | 62 kDa   | NA | NA | NA | 86600000 | 1.97E+08 |
| tr H7BXV5 Collagen al COL18A1 | 71 kDa   | NA | NA | NA | 94700000 | 1.51E+08 |
| sp Q96AC1 Isoform 3 c FERMT2  | 79 kDa   | NA | NA | NA | 47500000 | 1.05E+08 |
| sp P68104 Isoform 2 c EEF1A1  | 48 kDa   | NA | NA | NA | 2.55E+08 | 4.44E+08 |
| sp O00159 Isoform 3 c MYO1C   | 120 kDa  | NA | NA | NA | 5.90E+07 | 1.50E+08 |
| sp HBB_HL sp HBB_HL HBB       | 16 kDa   | NA | NA | NA | 1.53E+08 | 2.82E+08 |
| sp P04075 Fructose-bi ALDOA   | 39 kDa   | NA | NA | NA | 90900000 | 1.42E+08 |
| sp P35580 Isoform 3 c MYH10   | 231 kDa  | NA | NA | NA | 1.38E+08 | 2.65E+08 |
| sp Q05682 Isoform 3 c CALD1   | 64 kDa   | NA | NA | NA | 73200000 | 1.96E+08 |
| sp Q13733 Sodium/po ATP1A4    | 114 kDa  | NA | NA | NA | 35300000 | 1.17E+08 |
| sp P08238 Heat shock HSP90AB1 | 83 kDa   | NA | NA | NA | 2.39E+08 | 5.07E+08 |
| sp O75369 Isoform 2 c FLNB    | 276 kDa  | NA | NA | NA | 2.90E+07 | 69500000 |
| sp P10909 Isoform 2 c CLU     | 58 kDa   | NA | NA | NA | 81300000 | 1.25E+08 |
| sp P06756 Isoform 3 c ITGAV   | 111 kDa  | NA | NA | NA | 19900000 | 27800000 |
| sp P23528 Cofilin-1 CFL1      | 19 kDa   | NA | NA | NA | 1.20E+08 | 2.31E+08 |
| sp P52272 Heterogen HNRNPM    | 78 kDa   | NA | NA | NA | 5129200  | 17200000 |
| sp P31946 14-3-3 prot YWHAB   | 28 kDa   | NA | NA | NA | 74400000 | 1.35E+08 |
| sp P00918 Carbonic an CA2     | 29 kDa   | NA | NA | NA | 81900000 | 1.22E+08 |
| sp P02794 Ferritin hec FTH1   | 21 kDa   | NA | NA | NA | 3518800  | 7320400  |
| sp P84077 ADP-ribosy ARF1     | 21 kDa   | NA | NA | NA | 9067500  | 13800000 |
| sp P23142 Isoform C c FBLN1   | 74 kDa   | NA | NA | NA | 12700000 | 25300000 |
| tr F5H491 Ras-related RAP1B   | 10 kDa   | NA | NA | NA | 28500000 | 32400000 |
| sp Q27J81 Isoform 2 c INF2    | 135 kDa  | NA | NA | NA | 7443300  | 11300000 |
| sp Q8IZC6 Collagen al COL27A1 | 187 kDa  | NA | NA | NA | 0        | 0        |
| sp Q15599 Na(+)/H(+) SLC9A3R2 | 37 kDa   | NA | NA | NA | 20500000 | 37700000 |
| sp P00387 Isoform 3 c CYB5R3  | 38 kDa   | NA | NA | NA | 3.40E+07 | 72900000 |
| sp Q15084 Isoform 5 c PDIA6   | 53 kDa   | NA | NA | NA | 8156000  | 3.50E+07 |
| sp P50395 Isoform 2 c GDI2    | 46 kDa   | NA | NA | NA | 4.60E+07 | 67500000 |
| sp P04040 Catalase CAT        | 60 kDa   | NA | NA | NA | 8366200  | 23700000 |
| sp Q9UJU6 Isoform 2 c DBNL    | 48 kDa   | NA | NA | NA | 10200000 | 30400000 |
| sp Q68CZ2 Tensin-3 TNS3       | 155 kDa  | NA | NA | NA | 17800000 | 41700000 |
| sp Q00839 Isoform Sh HNRNPU   | 89 kDa   | NA | NA | NA | 28900000 | 57400000 |
| tr B1AK88 Capping pri CAPZB   | 34 kDa   | NA | NA | NA | 27300000 | 39700000 |
| sp Q86VP6 Isoform 2 c CAND1   | 118 kDa  | NA | NA | NA | 3982700  | 13600000 |
| sp O94856 Isoform 12 NFASC    | 120 kDa  | NA | NA | NA | 7880400  | 14400000 |
| sp P30044 Isoform Cy PRDX5    | 17 kDa   | NA | NA | NA | 28500000 | 2.80E+07 |
| sp Q03252 Lamin-B2 LMNB2      | 68 kDa   | NA | NA | NA | 7135100  | 13700000 |
| sp Q15746 Isoform De MYLK     | 211 kDa  | NA | NA | NA | 2614300  | 1.40E+07 |
| sp Q07092 Isoform 2 c COL16A1 | 158 kDa  | NA | NA | NA | 0        | 0        |
| sp P51991 Isoform 2 c HNRNPA3 | 37 kDa   | NA | NA | NA | 21800000 | 60600000 |
| sp P12235 ADP/ATP tr SLC25A4  | 33 kDa   | NA | NA | NA | 31400000 | 47400000 |
| sp Q13561 Isoform 2 c DCTN2   | 45 kDa   | NA | NA | NA | 1132200  | 19800000 |
| sp P06748 Nucleopho NPM1      | 33 kDa   | NA | NA | NA | 0        | 14300000 |
| sp P04899 Isoform 3 c GNAI2   | 36 kDa   | NA | NA | NA | 9461900  | 14100000 |



|                                |         |    |    |    |          |          |
|--------------------------------|---------|----|----|----|----------|----------|
| sp Q8WUN Isoform 2 c PDCD6IP   | 97 kDa  | NA | NA | NA | 11400000 | 1.80E+07 |
| sp Q03164 Isoform 3 c KMT2A    | 432 kDa | NA | NA | NA | 0        | 0        |
| sp Q8NFD Isoform 2 c ARID1B    | 238 kDa | NA | NA | NA | 0        | 0        |
| tr D6W5N Membrane MAGI2        | 139 kDa | NA | NA | NA | 8144300  | 23200000 |
| sp Q8IVF2 Protein AHI AHNAK2   | 617 kDa | NA | NA | NA | 0        | 0        |
| sp Q86VF2 Isoform 5 c IGFN1    | 384 kDa | NA | NA | NA | 0        | 0        |
| sp P0CG05 Ig lambda-; IGLC2    | 11 kDa  | NA | NA | NA | 0        | 49900000 |
| sp P63000 Ras-related RAC1     | 21 kDa  | NA | NA | NA | 8335200  | 28500000 |
| sp Q8IZP2 Putative pr ST13P4   | 27 kDa  | NA | NA | NA | 14600000 | 30600000 |
| sp P49748 Isoform 2 c ACADVL   | 68 kDa  | NA | NA | NA | 11700000 | 26100000 |
| sp P31150 Rab GDP di GDI1      | 51 kDa  | NA | NA | NA | 2.60E+07 | 46100000 |
| sp P51659 Peroxisom; HSD17B4   | 80 kDa  | NA | NA | NA | 5230900  | 19400000 |
| sp O75955 Flotillin-1 FLOT1    | 47 kDa  | NA | NA | NA | 1915100  | 4985200  |
| sp P17813 Isoform Sh; ENG      | 68 kDa  | NA | NA | NA | 2404600  | 4818200  |
| tr F8VUA6 60S ribosor RPL18    | 15 kDa  | NA | NA | NA | 5499600  | 22900000 |
| sp O95428 Isoform 6 c PAPLN    | 135 kDa | NA | NA | NA | 0        | 2760200  |
| sp Q13838 Isoform 2 c DDX39B   | 51 kDa  | NA | NA | NA | 10800000 | 24300000 |
| sp Q9NR1 Isoform 2 c PDLIM7    | 47 kDa  | NA | NA | NA | 5471600  | 6448400  |
| sp Q15063 Isoform 2 c POSTN    | 87 kDa  | NA | NA | NA | 791360   | 1258100  |
| sp P63092 Isoform Gn GNAS      | 44 kDa  | NA | NA | NA | 8553200  | 37800000 |
| sp P11940 Polyadenyl; PABPC1   | 71 kDa  | NA | NA | NA | 0        | 9566800  |
| sp P22061 Isoform 2 c PCMT1    | 25 kDa  | NA | NA | NA | 7866000  | 27500000 |
| sp Q9NZM Isoform 6 c MYOF      | 233 kDa | NA | NA | NA | 1423900  | 9550100  |
| sp O00429 Isoform 5 c DNM1L    | 79 kDa  | NA | NA | NA | 2006400  | 2175100  |
| sp P13804 Isoform 2 c ETFA     | 30 kDa  | NA | NA | NA | 11100000 | 6288300  |
| tr D6RGG3 Collagen al; COL12A1 | 333 kDa | NA | NA | NA | 0        | 3.55E+08 |
| sp P60842 Eukaryotic EIF4A1    | 46 kDa  | NA | NA | NA | 33700000 | 60300000 |
| sp Q86UX Inter-alpha ITIH5     | 105 kDa | NA | NA | NA | 2649800  | 5199500  |
| sp P16615 Isoform 2 c ATP2A2   | 110 kDa | NA | NA | NA | 1619200  | 2154000  |
| sp P59666 Neutrophil DEFA3     | 10 kDa  | NA | NA | NA | 17400000 | 0        |
| tr E7EUC7 UTP--gluco; UGP2     | 58 kDa  | NA | NA | NA | 5257200  | 6138200  |
| sp O15417 Trinucleoti TNRC18   | 315 kDa | NA | NA | NA | 0        | 0        |
| sp Q8TEW Isoform 2 c PARD3B    | 126 kDa | NA | NA | NA | 2776400  | 12300000 |
| sp P20711 Aromatic-L DDC       | 54 kDa  | NA | NA | NA | 8044600  | 8015100  |
| sp Q13642 Isoform 5 c FHL1     | 34 kDa  | NA | NA | NA | 10900000 | 24800000 |
| sp Q9P2E9 Isoform 1 c RRBP1    | 152 kDa | NA | NA | NA | 4560000  | 4287600  |
| tr J3QQX2 Rho GDP-d; ARHGDI A  | 26 kDa  | NA | NA | NA | 0        | 0        |
| sp P09960 Leukotrien; LTA4H    | 69 kDa  | NA | NA | NA | 7151000  | 9949500  |
| sp P48643 Isoform 2 c CCT5     | 50 kDa  | NA | NA | NA | 3881200  | 5611100  |
| sp P26640 Valine--tRN; VARS    | 140 kDa | NA | NA | NA | 0        | 0        |
| tr E9PEX6 Dihydrolipe; DLD     | 52 kDa  | NA | NA | NA | 2167400  | 13200000 |
| sp Q8TAA Isoform 2 c PSMA8     | 24 kDa  | NA | NA | NA | 0        | 4166500  |
| tr J3KPD9 Nucleoside NME2      | 22 kDa  | NA | NA | NA | 5248400  | 20200000 |
| sp P28799 Granulins; GRN       | 64 kDa  | NA | NA | NA | 5320700  | 5947100  |
| sp Q14103 Isoform 2 c HNRNPD   | 36 kDa  | NA | NA | NA | 3372500  | 38500000 |
| sp P49419 Isoform 4 c ALDH7A1  | 54 kDa  | NA | NA | NA | 2571200  | 5386600  |
| sp O60506 Heterogen; SYNCRIP   | 70 kDa  | NA | NA | NA | 8255200  | 12100000 |

|                                |         |    |    |    |         |          |
|--------------------------------|---------|----|----|----|---------|----------|
| sp Q92945 Far upstrea KHSRP    | 73 kDa  | NA | NA | NA | 0       | 0        |
| sp Q6ZVM TOM1-like TOM1L2      | 56 kDa  | NA | NA | NA | 515670  | 0        |
| sp Q01105 Isoform 3 c SET      | 31 kDa  | NA | NA | NA | 4597200 | 7229600  |
| sp Q9P0K7 Isoform 2 c RAI14    | 110 kDa | NA | NA | NA | 2785700 | 4551000  |
| sp P54819 Isoform 2 c AK2      | 26 kDa  | NA | NA | NA | 794200  | 884850   |
| sp O43390 Isoform 2 c HNRNPR   | 71 kDa  | NA | NA | NA | 6730900 | 13100000 |
| tr D6R9L0 Guanine nu GNB2L1    | 33 kDa  | NA | NA | NA | 1995700 | 0        |
| tr C9JZR2 Catenin del CTNND1   | 105 kDa | NA | NA | NA | 0       | 0        |
| sp P07602 Prosaposin PSAP      | 58 kDa  | NA | NA | NA | 198540  | 413440   |
| sp Q6KC79 Nipped-B-li NIPBL    | 316 kDa | NA | NA | NA | 0       | 0        |
| sp P35611 Isoform 3 c ADD1     | 84 kDa  | NA | NA | NA | 4064500 | 11100000 |
| sp Q9ULV4 Isoform 3 c CORO1C   | 59 kDa  | NA | NA | NA | 2269900 | 2047900  |
| sp P28331 Isoform 2 c NDUFS1   | 81 kDa  | NA | NA | NA | 1424600 | 0        |
| sp P07305 Histone H1 H1F0      | 21 kDa  | NA | NA | NA | 3364200 | 6101400  |
| sp P55008 Allograft in AIF1    | 17 kDa  | NA | NA | NA | 2084100 | 2728700  |
| sp P62942 Peptidyl-pr FKBP1A   | 12 kDa  | NA | NA | NA | 0       | 0        |
| sp Q12906 Isoform 3 c ILF3     | 83 kDa  | NA | NA | NA | 1868800 | 3905600  |
| sp O43399 Isoform 5 c TPD52L2  | 24 kDa  | NA | NA | NA | 2118700 | 4233300  |
| sp Q14980 Isoform 2 c NUMA1    | 237 kDa | NA | NA | NA | 5581200 | 344410   |
| sp Q6KB66 Isoform 2 c KRT80    | 47 kDa  | NA | NA | NA | 0       | 34700000 |
| sp P62873 Guanine nu GNB1      | 37 kDa  | NA | NA | NA | 5483700 | 17600000 |
| sp P55290 Isoform 4 c CDH13    | 83 kDa  | NA | NA | NA | 0       | 4034900  |
| sp Q9BZF9 Isoform 2 c UACA     | 162 kDa | NA | NA | NA | 0       | 1262100  |
| sp P38159 RNA-bindin RBMX      | 42 kDa  | NA | NA | NA | 5363000 | 10200000 |
| sp Q13228 Isoform 4 c SELENBP1 | 57 kDa  | NA | NA | NA | 0       | 0        |
| sp P55084 Isoform 2 c HADHB    | 49 kDa  | NA | NA | NA | 4610900 | 2296000  |
| sp O60504 Vinexin SORBS3       | 75 kDa  | NA | NA | NA | 0       | 0        |
| sp O95996 Isoform 3 c APC2     | 244 kDa | NA | NA | NA | 0       | 0        |
| sp P20591 Interferon- MX1      | 76 kDa  | NA | NA | NA | 7942700 | 10900000 |
| sp Q13200 26S protea: PSMD2    | 100 kDa | NA | NA | NA | 0       | 0        |
| sp Q9UMS Isoform 4 c SYNPO2    | 133 kDa | NA | NA | NA | 4018400 | 7530900  |
| sp Q9Y6W Wiskott-Alc WASF2     | 54 kDa  | NA | NA | NA | 541940  | 888680   |
| sp Q9HOW Ester hydrc C11orf54  | 35 kDa  | NA | NA | NA | 0       | 0        |
| sp P50914 60S ribosor RPL14    | 23 kDa  | NA | NA | NA | 3082500 | 7664600  |
| sp P34913 Isoform 2 c EPHX2    | 57 kDa  | NA | NA | NA | 529730  | 0        |
| sp P35637 Isoform Sh FUS       | 53 kDa  | NA | NA | NA | 4597600 | 6840000  |
| sp P38117 Isoform 2 c ETFB     | 37 kDa  | NA | NA | NA | 9117400 | 18400000 |
| sp P09467 Fructose-1, FBP1     | 37 kDa  | NA | NA | NA | 1647400 | 1091700  |
| tr B0QZ18 Copine-1 CPNE1       | 60 kDa  | NA | NA | NA | 0       | 0        |
| sp O15020 Spectrin be SPTBN2   | 271 kDa | NA | NA | NA | 2273400 | 2634700  |
| sp P02747 Compleme C1QC        | 26 kDa  | NA | NA | NA | 0       | 0        |
| sp P62854 40S ribosor RPS26    | 13 kDa  | NA | NA | NA | 2227500 | 10400000 |
| sp P54725 Isoform 3 c RAD23A   | 40 kDa  | NA | NA | NA | 0       | 0        |
| sp Q9BUT13-hydroxyb BDH2       | 27 kDa  | NA | NA | NA | 821680  | 599290   |
| sp P53999 Activated R SUB1     | 14 kDa  | NA | NA | NA | 0       | 0        |
| sp O75368 SH3 domai SH3BGRL    | 13 kDa  | NA | NA | NA | 0       | 0        |
| sp P17612 cAMP-depe PRKACA     | 41 kDa  | NA | NA | NA | 876290  | 3904900  |

|                                |         |    |    |    |          |          |
|--------------------------------|---------|----|----|----|----------|----------|
| sp P68036-Isoform 3 c UBE2L3   | 24 kDa  | NA | NA | NA | 1280100  | 0        |
| sp O75340-Programme PDCD6      | 22 kDa  | NA | NA | NA | 1277900  | 3220800  |
| sp P35998-26S protea: PSMC2    | 49 kDa  | NA | NA | NA | 2160000  | 734120   |
| sp Q96AB3-Isochorism: ISOC2    | 22 kDa  | NA | NA | NA | 3497700  | 2152500  |
| sp Q4ZHG7-Fibronectin FNDC1    | 206 kDa | NA | NA | NA | 0        | 0        |
| sp P13688-Carcinoeml CEACAM1   | 58 kDa  | NA | NA | NA | 0        | 6151100  |
| sp Q16610-Isoform 4 c ECM1     | 64 kDa  | NA | NA | NA | 0        | 0        |
| sp P00747-Plasminoge PLG       | 91 kDa  | NA | NA | NA | 3045800  | 0        |
| sp Q14240-Isoform 2 c EIF4A2   | 46 kDa  | NA | NA | NA | 30100000 | 53900000 |
| sp P62314-Small nucle SNRPD1   | 13 kDa  | NA | NA | NA | 0        | 0        |
| sp P62995-Isoform 3 c TRA2B    | 22 kDa  | NA | NA | NA | 1328800  | 3629900  |
| sp Q9NYC5-Dynein hea DNAH9     | 512 kDa | NA | NA | NA | 0        | 0        |
| sp P46937-Isoform 3 c YAP1     | 49 kDa  | NA | NA | NA | 0        | 0        |
| sp Q13510-Isoform 2 c ASAH1    | 47 kDa  | NA | NA | NA | 0        | 0        |
| sp P40121-Macrophag CAPG       | 38 kDa  | NA | NA | NA | 1966200  | 3308400  |
| sp Q92841-Isoform 4 c DDX17    | 73 kDa  | NA | NA | NA | 2939800  | 15300000 |
| sp Q9P2J5-Isoform 2 c LARS     | 128 kDa | NA | NA | NA | 1156900  | 920970   |
| sp P14868-Aspartate-- DARS     | 57 kDa  | NA | NA | NA | 3174800  | 0        |
| sp P62847-Isoform 2 c RPS24    | 15 kDa  | NA | NA | NA | 1245200  | 0        |
| sp P07203-Glutathion GPX1      | 22 kDa  | NA | NA | NA | 0        | 0        |
| sp O14787-Isoform 2 c TNPO2    | 100 kDa | NA | NA | NA | 0        | 3341000  |
| sp Q9NZB2-Isoform D c FAM120A  | 117 kDa | NA | NA | NA | 0        | 0        |
| sp Q15056-Isoform Sh EIF4H     | 25 kDa  | NA | NA | NA | 6448900  | 0        |
| sp P48059-Isoform 2 c LIMS1    | 38 kDa  | NA | NA | NA | 1718100  | 7642500  |
| tr M0R210-40S ribosor RPS16    | 14 kDa  | NA | NA | NA | 0        | 0        |
| sp Q3L8U1-Chromodor CHD9       | 326 kDa | NA | NA | NA | 0        | 0        |
| sp Q9ULD5-Zinc finger ZNF608   | 162 kDa | NA | NA | NA | 0        | 0        |
| sp Q9BUPC-EF-hand do EFHD1     | 27 kDa  | NA | NA | NA | 582910   | 523270   |
| sp O00560-Isoform 2 c SDCBP    | 32 kDa  | NA | NA | NA | 333540   | 646190   |
| tr D6W648-Calmodulin CAMSAP3   | 136 kDa | NA | NA | NA | 0        | 0        |
| sp O95837-Guanine nu GNA14     | 42 kDa  | NA | NA | NA | 2525000  | 0        |
| sp Q9Y2Q5-Glutathion GSTK1     | 25 kDa  | NA | NA | NA | 0        | 0        |
| sp P49753-Acyl-coenz ACOT2     | 53 kDa  | NA | NA | NA | 3204300  | 2778900  |
| sp P10155-Isoform 3 c TROVE2   | 58 kDa  | NA | NA | NA | 2481200  | 6200000  |
| tr G3V126-ATPase, H+ ATP6V1H   | 52 kDa  | NA | NA | NA | 0        | 4015400  |
| tr D6RIA3-Protein LO LOC285556 | 190 kDa | NA | NA | NA | 0        | 0        |
| sp P08493-Isoform 2 c MGP      | 15 kDa  | NA | NA | NA | 0        | 10600000 |
| sp P58107-Epiplakin EPPK1      | 556 kDa | NA | NA | NA | 2242600  | 2913100  |
| sp Q765P7-MTSS1-like MTSS1L    | 80 kDa  | NA | NA | NA | 0        | 0        |
| sp Q16666-Gamma-int IFI16      | 88 kDa  | NA | NA | NA | 0        | 1669800  |
| sp Q32MZ7-Leucine-ric LRRFIP1  | 89 kDa  | NA | NA | NA | 0        | 0        |
| sp Q16643-Isoform 3 c DBN1     | 76 kDa  | NA | NA | NA | 1516100  | 0        |
| sp Q9BSE5-Agmatinase AGMAT     | 38 kDa  | NA | NA | NA | 7490100  | 8025800  |
| sp P42126-Enoyl-CoA ECI1       | 33 kDa  | NA | NA | NA | 1397400  | 0        |
| sp P50213-Isoform 2 c IDH3A    | 31 kDa  | NA | NA | NA | 0        | 0        |
| sp Q86UX7-Isoform 2 c FERMT3   | 75 kDa  | NA | NA | NA | 1445900  | 1619600  |
| tr A8MUS3-60S ribosor RPL23A   | 22 kDa  | NA | NA | NA | 0        | 0        |

|                                |         |    |    |    |          |          |
|--------------------------------|---------|----|----|----|----------|----------|
| sp Q14152 Isoform 2 c EIF3A    | 163 kDa | NA | NA | NA | 237830   | 0        |
| sp P54098 DNA polym POLG       | 140 kDa | NA | NA | NA | 4925300  | 0        |
| sp A6NDB9 Paralemmi PALM3      | 72 kDa  | NA | NA | NA | 0        | 0        |
| tr H0YL54 LIM/homeo LHX9       | 38 kDa  | NA | NA | NA | 0        | 0        |
| sp O43813 LanC-like p LANCL1   | 45 kDa  | NA | NA | NA | 1290800  | 2648700  |
| sp Q16629 Serine/argi SRSF7    | 27 kDa  | NA | NA | NA | 0        | 14200000 |
| sp Q71UI9 Histone H2 H2AFV     | 14 kDa  | NA | NA | NA | 1.72E+08 | 4.32E+08 |
| sp O15014 Zinc finger ZNF609   | 151 kDa | NA | NA | NA | 0        | 0        |
| sp P54920 Alpha-solul NAPA     | 33 kDa  | NA | NA | NA | 3472100  | 4786400  |
| sp Q13263 Isoform 2 c TRIM28   | 79 kDa  | NA | NA | NA | 1762200  | 8318200  |
| sp Q15569 Dual specif TESK1    | 68 kDa  | NA | NA | NA | 0        | 28100000 |
| sp Q9BYX7 Putative be POTEKP   | 42 kDa  | NA | NA | NA | 2.04E+09 | 3.42E+09 |
| sp P49720 Proteasom PSMB3      | 23 kDa  | NA | NA | NA | 0        | 0        |
| sp P53618 Coatomer s COPB1     | 107 kDa | NA | NA | NA | 1070300  | 1432600  |
| sp O43852 Isoform 2 c CALU     | 37 kDa  | NA | NA | NA | 0        | 0        |
| sp Q6XQN1 Isoform 3 c NAPRT    | 56 kDa  | NA | NA | NA | 1816700  | 1718700  |
| sp P22307 Isoform SCI SCP2     | 15 kDa  | NA | NA | NA | 894460   | 0        |
| sp TRFE_H sp TRFE_H TRFE       | 77 kDa  | NA | NA | NA | 0        | 0        |
| sp P28070 Proteasom PSMB4      | 29 kDa  | NA | NA | NA | 0        | 0        |
| sp Q16775 Isoform 2 c HAGH     | 29 kDa  | NA | NA | NA | 0        | 0        |
| sp Q8TCD5 5'(3')-deoxi NT5C    | 23 kDa  | NA | NA | NA | 0        | 0        |
| sp Q9BXR6 Compleme CFHR5       | 64 kDa  | NA | NA | NA | 0        | 2574100  |
| sp O60749 Isoform 2 c SNX2     | 46 kDa  | NA | NA | NA | 0        | 0        |
| sp P20339 Isoform 2 c RAB5A    | 22 kDa  | NA | NA | NA | 1441500  | 0        |
| sp Q99460 Isoform 2 c PSMD1    | 102 kDa | NA | NA | NA | 534950   | 0        |
| tr J3KS54 Protein flig FLII    | 78 kDa  | NA | NA | NA | 0        | 0        |
| sp P29508 Isoform 2 c SERPINB3 | 39 kDa  | NA | NA | NA | 0        | 0        |
| sp P48637 Isoform 2 c GSS      | 40 kDa  | NA | NA | NA | 771790   | 2709500  |
| sp Q9NPH1 Isoform 2 c ISYNA1   | 47 kDa  | NA | NA | NA | 784290   | 1242200  |
| sp P61077 Isoform 2 c UBE2D3   | 17 kDa  | NA | NA | NA | 0        | 994590   |
| sp O75064 DENN dom DENND4B     | 164 kDa | NA | NA | NA | 0        | 0        |
| sp P54578 Isoform 3 c USP14    | 55 kDa  | NA | NA | NA | 2157600  | 4577100  |
| sp Q6NZI2 Isoform 2 c PTRF     | 33 kDa  | NA | NA | NA | 1911300  | 3543200  |
| sp Q8N1G1 Leucine-ric LRRC47   | 63 kDa  | NA | NA | NA | 1956300  | 0        |
| sp Q96AJ9 Vesicle trar VTI1A   | 25 kDa  | NA | NA | NA | 0        | 0        |
| sp O43583 Density-reg DENR     | 22 kDa  | NA | NA | NA | 0        | 0        |
| sp O00203 Isoform 2 c AP3B1    | 116 kDa | NA | NA | NA | 1513600  | 0        |
| tr H0Y9K1 Protein tra SEC31A   | 26 kDa  | NA | NA | NA | 0        | 328380   |
| sp O95954 Isoform C c FTCD     | 61 kDa  | NA | NA | NA | 1469100  | 1067600  |
| sp Q86W5 Poly(ADP-ri PARG      | 111 kDa | NA | NA | NA | 0        | 0        |
| sp P37840 Isoform 2-4 SNCA     | 11 kDa  | NA | NA | NA | 0        | 3030400  |
| sp P61020 Ras-related RAB5B    | 24 kDa  | NA | NA | NA | 1554700  | 3114300  |
| sp Q9UKG1 DCC-intera APPL1     | 80 kDa  | NA | NA | NA | 0        | 3463500  |
| tr C9JQS9 Propionyl-C PCCB     | 61 kDa  | NA | NA | NA | 0        | 0        |
| sp Q2M1P1 Kinesin-like KIF7    | 151 kDa | NA | NA | NA | 0        | 0        |
| sp O14979 Heterogen HNRNPDL    | 46 kDa  | NA | NA | NA | 2611000  | 8427000  |
| sp Q5HY64 Putative pr FAM47C   | 115 kDa | NA | NA | NA | 0        | 0        |

|                                 |         |    |    |    |          |          |
|---------------------------------|---------|----|----|----|----------|----------|
| sp O14974 Isoform 4 c PPP1R12A  | 109 kDa | NA | NA | NA | 0        | 0        |
| sp Q99729 Heterogen HNRNPAB     | 36 kDa  | NA | NA | NA | 0        | 0        |
| sp P45954 Short/bran ACADSB     | 47 kDa  | NA | NA | NA | 2160400  | 0        |
| sp P11310 Isoform 2 c ACADM     | 47 kDa  | NA | NA | NA | 3512800  | 2397300  |
| sp Q13596 Isoform 3 c SNX1      | 63 kDa  | NA | NA | NA | 1897000  | 5335900  |
| sp Q92734 Isoform 4 c TFG       | 31 kDa  | NA | NA | NA | 0        | 0        |
| sp P21912 Succinate c SDHB      | 32 kDa  | NA | NA | NA | 0        | 1227900  |
| sp Q6ZMP1 Thrombos THSD4        | 112 kDa | NA | NA | NA | 0        | 0        |
| sp P04440 HLA class II HLA-DPB1 | 29 kDa  | NA | NA | NA | 2708600  | 6564600  |
| sp Q58FF6 Putative he HSP90AB4F | 58 kDa  | NA | NA | NA | 0        | 39600000 |
| sp Q9P275 Isoform 2 c USP36     | 123 kDa | NA | NA | NA | 0        | 0        |
| tr H3BUX2 Cytochrom CYB5B       | 16 kDa  | NA | NA | NA | 8303000  | 12600000 |
| sp P50453 Serpin B9 SERPINB9    | 42 kDa  | NA | NA | NA | 0        | 0        |
| sp P21926 CD9 antige CD9        | 25 kDa  | NA | NA | NA | 0        | 0        |
| sp P35914 Isoform 2 c HMGCL     | 27 kDa  | NA | NA | NA | 2344200  | 437560   |
| sp Q14344 Guanine nu GNA13      | 44 kDa  | NA | NA | NA | 6302400  | 19600000 |
| sp P11413 Isoform LoI G6PD      | 64 kDa  | NA | NA | NA | 1016500  | 0        |
| sp P41743 Protein kin. PRKCI    | 68 kDa  | NA | NA | NA | 0        | 0        |
| sp O60701 Isoform 2 c UGDH      | 48 kDa  | NA | NA | NA | 0        | 0        |
| sp O94760 Isoform 2 c DDAH1     | 20 kDa  | NA | NA | NA | 0        | 0        |
| sp P43307 Translocon SSR1       | 32 kDa  | NA | NA | NA | 0        | 0        |
| sp Q96EP5 Isoform 2 c DAZAP1    | 41 kDa  | NA | NA | NA | 0        | 4473900  |
| sp Q9UI17 Dimethylgl DMGDH      | 97 kDa  | NA | NA | NA | 0        | 0        |
| sp A1A5D9 Isoform 2 c CCDC64B   | 34 kDa  | NA | NA | NA | 0        | 0        |
| sp P32456 Interferon- GBP2      | 67 kDa  | NA | NA | NA | 0        | 5893700  |
| sp K1H8_H sp K1H8_H K1H8        | 50 kDa  | NA | NA | NA | 0        | 0        |
| sp P35612 Isoform 9 c ADD2      | 64 kDa  | NA | NA | NA | 0        | 0        |
| sp P63220 40S ribosor RPS21     | 9 kDa   | NA | NA | NA | 0        | 0        |
| tr A0A0871 Endophilin- SH3GLB1  | 44 kDa  | NA | NA | NA | 534840   | 1286400  |
| tr D6RGV5 Cytochrom COX7A2      | 12 kDa  | NA | NA | NA | 0        | 0        |
| sp P55145 Mesencephl MANF       | 21 kDa  | NA | NA | NA | 5751500  | 0        |
| sp Q14194 Dihydropyr CRMP1      | 62 kDa  | NA | NA | NA | 10300000 | 35200000 |
| sp O14558 Heat shock HSPB6      | 17 kDa  | NA | NA | NA | 0        | 0        |
| sp Q92764 Keratin, tyf KRT35    | 50 kDa  | NA | NA | NA | 0        | 0        |
| sp P54136 Isoform Mc RARS       | 67 kDa  | NA | NA | NA | 0        | 0        |
| sp Q12931 Heat shock TRAP1      | 80 kDa  | NA | NA | NA | 50900000 | 96500000 |
| sp P09488 Isoform 2 c GSTM1     | 21 kDa  | NA | NA | NA | 3978200  | 9015700  |
| sp Q9NQR Omega-am NIT2          | 31 kDa  | NA | NA | NA | 0        | 0        |
| sp Q16698 Isoform 2 c DECR1     | 35 kDa  | NA | NA | NA | 0        | 0        |
| sp Q8IYF3- Isoform 3 c TEX11    | 107 kDa | NA | NA | NA | 0        | 0        |
| sp P05814 Beta-caseir CSN2      | 25 kDa  | NA | NA | NA | 0        | 0        |
| tr A0A0871 Ig gamma-:IGHG3      | 57 kDa  | NA | NA | NA | 19600000 | 3.90E+07 |
| sp P42677 40S ribosor RPS27     | 9 kDa   | NA | NA | NA | 0        | 0        |
| sp Q13283 Ras GTPase G3BP1      | 52 kDa  | NA | NA | NA | 0        | 5029400  |
| sp P20592 Interferon- MX2       | 82 kDa  | NA | NA | NA | 3936600  | 4678400  |
| sp P38919 Eukaryotic EIF4A3     | 47 kDa  | NA | NA | NA | 12800000 | 26700000 |
| sp P17844 Isoform 2 c DDX5      | 61 kDa  | NA | NA | NA | 2939800  | 10400000 |

|                                |         |          |          |          |          |          |
|--------------------------------|---------|----------|----------|----------|----------|----------|
| sp P18621- Isoform 2 c RPL17   | 17 kDa  | NA       | NA       | NA       | 1283900  | 5131000  |
| sp P04279- Isoform 2 c SEMG1   | 45 kDa  | NA       | NA       | NA       | 0        | 0        |
| sp P80723- Isoform 2 c BASP1   | 18 kDa  | NA       | NA       | NA       | 0        | 0        |
| sp P13798 Acylamino- APEH      | 81 kDa  | NA       | NA       | NA       | 0        | 0        |
| sp P22528 Cornifin-B SPRR1B    | 10 kDa  | NA       | NA       | NA       | 0        | 0        |
| sp Q9BVK6 Transmeml TMED9      | 27 kDa  | NA       | NA       | NA       | 0        | 0        |
| sp Q9Y5Y2 Cytosolic Fr NUBP2   | 29 kDa  | NA       | NA       | NA       | 0        | 0        |
| sp NQO2_1 sp NQO2_1 NQO2       | 26 kDa  | NA       | NA       | NA       | 0        | 0        |
| sp P26583 High mobili HMGB2    | 24 kDa  | NA       | NA       | NA       | 1627600  | 8150800  |
| sp P17213 Bactericida BPI      | 54 kDa  | NA       | NA       | NA       | 0        | 0        |
| sp P32320 Cytidine de CDA      | 16 kDa  | NA       | NA       | NA       | 0        | 0        |
| tr C9JNS9 V-type prot ATP6V1B1 | 27 kDa  | NA       | NA       | NA       | 2373100  | 3041300  |
| sp P30613- Isoform L-t PKLR    | 58 kDa  | NA       | NA       | NA       | 12100000 | 16400000 |
| sp Q6E0U4 Isoform 3 c DMKN     | 37 kDa  | NA       | NA       | NA       | 0        | 0        |
| sp Q9Y5G5 Protocadhe PCDHGA8   | 101 kDa | NA       | NA       | NA       | 0        | 0        |
| sp Q02218 2-oxoglutar OGDH     | 116 kDa | NA       | NA       | NA       | 2943200  | 3074900  |
| sp P23396 40S ribosor RPS3     | 27 kDa  | NA       | NA       | NA       | 2263400  | 3571300  |
| sp P08865 40S ribosor RPSA     | 33 kDa  | 31900000 | 42800000 | 31100000 | NA       | NA       |
| sp P39687 Acidic leuci ANP32A  | 29 kDa  | NA       | NA       | NA       | 0        | 0        |
| sp Q99798 Aconitate f ACO2     | 85 kDa  | NA       | NA       | NA       | 77200000 | 75300000 |
| sp P07741 Adenine ph APRT      | 20 kDa  | 1727200  | 936850   | 1309800  | NA       | NA       |
| sp P00568 Adenylate l AK1      | 22 kDa  | NA       | NA       | NA       | 538810   | 661860   |
| sp Q10588 ADP-ribosy BST1      | 36 kDa  | 0        | 0        | 0        | NA       | NA       |
| sp P42330 Aldo-keto r AKR1C3   | 37 kDa  | 37200000 | 36300000 | 26600000 | NA       | NA       |
| sp P15121 Aldose redi AKR1B1   | 36 kDa  | NA       | NA       | NA       | 3293000  | 7219400  |
| sp Q92499 ATP-depen DDX1       | 82 kDa  | NA       | NA       | NA       | 1021400  | 2830100  |
| tr A0A0C4I Calpain sm. CAPNS1  | 34 kDa  | 82300000 | 1.34E+08 | 22800000 | NA       | NA       |
| sp Q99439 Calponin-2 CNN2      | 34 kDa  | 1.20E+07 | 14500000 | 11800000 | NA       | NA       |
| sp P13987 CD59 glyco CD59      | 14 kDa  | 0        | 5694000  | 19800000 | NA       | NA       |
| sp P20908 Collagen al COL5A1   | 184 kDa | NA       | NA       | NA       | 0        | 7364400  |
| sp P12109 Collagen al COL6A1   | 109 kDa | 1.24E+09 | 1.90E+09 | 1.44E+09 | NA       | NA       |
| sp Q16527 Cysteine ar CSRP2    | 21 kDa  | NA       | NA       | NA       | 6788100  | 15300000 |
| sp Q9HC35 Echinodern EML4      | 109 kDa | 1370800  | 0        | 0        | NA       | NA       |
| sp P15311 Ezrin EZR            | 69 kDa  | 2.86E+08 | 3.98E+08 | 3.32E+08 | NA       | NA       |
| sp Q14192 Four and a FHL2      | 32 kDa  | NA       | NA       | NA       | 1.40E+07 | 2.90E+07 |
| sp Q08380 Galectin-3- LGALS3BP | 65 kDa  | 4363100  | 18900000 | 5393800  | 9880900  | 14900000 |
| tr H0YBD7 Heterogen HNRNPH1    | 21 kDa  | NA       | NA       | NA       | 7648000  | 16200000 |
| tr A0A087I Ig kappa ch IGKC    | 26 kDa  | 1.54E+08 | 2.54E+08 | 1.74E+08 | NA       | NA       |
| sp Q12905 Interleukin ILF2     | 43 kDa  | 10200000 | 1.30E+07 | 4264000  | NA       | NA       |
| sp P24043 Laminin sul LAMA2    | 344 kDa | 0        | 2466200  | 0        | NA       | NA       |
| sp P07942 Laminin sul LAMB1    | 198 kDa | NA       | NA       | NA       | 0        | 1202500  |
| sp P43243 Matrin-3 MATR3       | 95 kDa  | 3173700  | 8516000  | 6805000  | NA       | NA       |
| tr H3BQK9 Microtubul MACF1     | 861 kDa | 27400000 | 14800000 | 49200000 | NA       | NA       |
| sp P60660 Myosin ligh MYL6     | 17 kDa  | 4.36E+08 | 7.81E+08 | 5.49E+08 | NA       | NA       |
| sp Q14112 Nidogen-2 NID2       | 151 kDa | NA       | NA       | NA       | 8509600  | 29600000 |
| sp Q9NTK5 Obg-like ATOLA1      | 45 kDa  | NA       | NA       | NA       | 3148400  | 4174700  |
| sp Q99623 Prohibitin-; PHB2    | 33 kDa  | NA       | NA       | NA       | 1134000  | 0        |

|                              |         |          |          |          |         |          |
|------------------------------|---------|----------|----------|----------|---------|----------|
| sp Q9UL46 Proteasom PSME2    | 27 kDa  | 3849700  | 2013200  | 1687500  | NA      | NA       |
| sp P55786 Puromycin-NPEPPS   | 103 kDa | 0        | 0        | 3265500  | NA      | NA       |
| sp Q9HBLC Tensin-1 TNS1      | 186 kDa | 1.00E+08 | 1.19E+08 | 1.15E+08 | NA      | NA       |
| sp P13693 Translation TPT1   | 20 kDa  | 3500600  | 15300000 | 11800000 | NA      | NA       |
| sp Q96JG9 Zinc finger ZNF469 | 410 kDa | NA       | NA       | NA       | 2382200 | 28500000 |

| FR_MAX   | FR_TX.MAX | FR_TX.MAX | FR_TX.MAX | FR_TX.MAX | FR_TX.MAX | FR_TX.MAX | FR_SDS.M/ |
|----------|-----------|-----------|-----------|-----------|-----------|-----------|-----------|
| FR9.2    | FR3.1.M   | FR6.1.M   | FR8.1.M   | FR3.2.M   | FR6.2.M   | FR8.2.M   | FR1.1.M   |
| 5.45E+08 | 1.30E+09  | 5.80E+09  | 1.44E+09  | 3.96E+08  | 3.32E+09  | 1.11E+09  | 6.37E+09  |
| 2.50E+09 | 5.52E+09  | 5.94E+09  | 7.50E+09  | 1.97E+09  | 2.91E+09  | 4.65E+09  | 1.10E+09  |
| 3.85E+09 | 5.94E+09  | 5.49E+09  | 9.43E+09  | 2.08E+09  | 2.84E+09  | 6.07E+09  | 7.46E+08  |
| 1.16E+09 | 2.63E+09  | 2.51E+09  | 3.29E+09  | 9.42E+08  | 1.22E+09  | 1.93E+09  | 3.54E+09  |
| 1.74E+09 | 3.69E+09  | 3.57E+09  | 4.72E+09  | 1.34E+09  | 1.91E+09  | 3.03E+09  | 5.85E+09  |
| 1.19E+08 | 1.69E+09  | 8.08E+09  | 1.77E+09  | 5.55E+08  | 3.81E+09  | 1.07E+09  | 5.09E+09  |
| 4.31E+08 | 2.72E+09  | 1.02E+10  | 2.67E+09  | 7.29E+08  | 5.23E+09  | 1.67E+09  | 8.37E+09  |
| 3.73E+09 | 2.05E+09  | 1.79E+09  | 3.42E+09  | 7.32E+08  | 1.04E+09  | 2.13E+09  | 2.37E+08  |
| 1.08E+09 | 2.32E+09  | 2.35E+09  | 3.03E+09  | 8.56E+08  | 1.24E+09  | 1.93E+09  | 4.79E+09  |
| 8.05E+08 | 1.84E+09  | 1.74E+09  | 2.39E+09  | 7.50E+08  | 9.86E+08  | 1.66E+09  | 5.58E+08  |
| 1.37E+09 | 3.10E+09  | 2.99E+09  | 3.79E+09  | 1.06E+09  | 1.62E+09  | 2.48E+09  | 6.10E+09  |
| 6.60E+08 | 9.62E+08  | 5.58E+09  | 1.58E+09  | 4.00E+08  | 4.07E+09  | 1.17E+09  | 5.59E+09  |
| 1.03E+09 | 1.80E+09  | 1.56E+09  | 2.11E+09  | 5.91E+08  | 7.84E+08  | 1.27E+09  | 1.66E+09  |
| 8.10E+08 | 1.95E+09  | 1.91E+09  | 2.37E+09  | 5.95E+08  | 8.44E+08  | 1.15E+09  | 4.51E+09  |
| 8.90E+08 | 1.55E+09  | 1.50E+09  | 1.98E+09  | 4.46E+08  | 6.57E+08  | 8.50E+08  | 5.63E+09  |
| 5.48E+08 | 3.66E+08  | 3.94E+08  | 6.08E+08  | 1.40E+08  | 1.99E+08  | 3.89E+08  | 1.23E+08  |
| 2.95E+08 | 4.32E+08  | 3.90E+08  | 6.27E+08  | 1.56E+08  | 2.06E+08  | 3.95E+08  | 69200000  |
| 9.76E+08 | 1.92E+09  | 1.81E+09  | 2.97E+09  | 8.43E+08  | 9.75E+08  | 1.97E+09  | 3.35E+08  |
| 1.89E+08 | 6.07E+08  | 5.62E+08  | 7.41E+08  | 2.44E+08  | 3.51E+08  | 5.22E+08  | 11500000  |
| 5.36E+08 | 3.38E+08  | 3.26E+08  | 5.40E+08  | 1.21E+08  | 1.50E+08  | 3.41E+08  | 1038600   |
| 5.75E+08 | 7.48E+08  | 8.36E+08  | 1.35E+09  | 3.05E+08  | 4.52E+08  | 7.86E+08  | 1.17E+08  |
| 7.70E+08 | 1.64E+09  | 1.67E+09  | 1.89E+09  | 4.99E+08  | 7.79E+08  | 1.17E+09  | 1.65E+09  |
| 3.54E+08 | 6.47E+08  | 6.16E+08  | 8.33E+08  | 2.53E+08  | 3.03E+08  | 4.71E+08  | 1.53E+09  |
| 5.11E+08 | 8.43E+08  | 1.94E+09  | 1.64E+09  | 2.89E+08  | 9.88E+08  | 8.56E+08  | 1.17E+09  |
| 9.96E+08 | 2.85E+09  | 2.84E+09  | 2.81E+09  | 8.60E+08  | 1.19E+09  | 1.79E+09  | 6.86E+09  |
| 5.09E+08 | 11100000  | 1.20E+07  | 28800000  | 1799700   | 4204000   | 16100000  | 33900000  |
| 2.32E+08 | 5.02E+08  | 4.88E+08  | 6.94E+08  | 1.86E+08  | 2.40E+08  | 4.16E+08  | 33400000  |
| 1.07E+09 | 1.84E+09  | 1.96E+09  | 2.78E+09  | 8.90E+08  | 1.44E+09  | 2.02E+09  | 3.72E+09  |
| 6.35E+08 | 7.60E+08  | 7.64E+08  | 1.05E+09  | 2.50E+08  | 3.81E+08  | 6.81E+08  | 38700000  |
| 8.95E+08 | 3.23E+09  | 2.24E+09  | 2.92E+09  | 8.89E+08  | 9.96E+08  | 1.77E+09  | 5.62E+09  |
| 2.70E+08 | 3.68E+08  | 4.44E+08  | 5.81E+08  | 1.33E+08  | 2.37E+08  | 2.98E+08  | 9.87E+08  |
| 6.92E+08 | 2.27E+09  | 1.88E+09  | 1.94E+09  | 5.56E+08  | 1.04E+09  | 1.18E+09  | 3.62E+09  |
| 6.37E+08 | 1.22E+09  | 1.39E+09  | 1.90E+09  | 3.99E+08  | 6.89E+08  | 1.09E+09  | 1.96E+08  |
| 3.33E+08 | 4.80E+08  | 5.51E+08  | 7.51E+08  | 2.45E+08  | 2.98E+08  | 4.97E+08  | 1.33E+09  |
| 4.23E+08 | 7.38E+08  | 8.08E+08  | 1.13E+09  | 2.81E+08  | 4.22E+08  | 6.72E+08  | 1.31E+08  |
| 2.11E+08 | 2.29E+08  | 2.22E+08  | 3.44E+08  | 98200000  | 74500000  | 2.52E+08  | 1425000   |
| 1.95E+08 | 1.40E+08  | 1.89E+08  | 3.16E+08  | 5.20E+07  | 58500000  | 1.62E+08  | 16700000  |
| 3.75E+08 | 6.72E+08  | 1.42E+09  | 1.19E+09  | 2.19E+08  | 6.83E+08  | 6.50E+08  | 8.93E+08  |
| 3.57E+08 | 4.76E+08  | 4.28E+08  | 6.05E+08  | 2.00E+08  | 2.34E+08  | 3.95E+08  | 13100000  |
| 2.62E+08 | 7.30E+08  | 7.79E+08  | 1.10E+09  | 1.73E+08  | 2.81E+08  | 4.67E+08  | 1.03E+08  |
| 1.11E+08 | 3.41E+08  | 2.67E+08  | 4.64E+08  | 1.34E+08  | 1.43E+08  | 2.44E+08  | 14100000  |
| 1.32E+08 | 3.03E+08  | 2.74E+08  | 3.54E+08  | 1.18E+08  | 1.84E+08  | 2.56E+08  | 87800000  |
| 2.12E+08 | 4.66E+08  | 5.01E+08  | 6.41E+08  | 1.90E+08  | 2.86E+08  | 4.03E+08  | 3257300   |
| 1.08E+08 | 3.32E+08  | 4.26E+08  | 4.03E+08  | 36500000  | 66300000  | 63100000  | 1.09E+09  |
| 3.56E+08 | 6.16E+08  | 5.21E+08  | 7.82E+08  | 1.89E+08  | 2.87E+08  | 5.19E+08  | 91300000  |



|          |          |          |          |          |          |          |          |
|----------|----------|----------|----------|----------|----------|----------|----------|
| 0        | 0        | 48400000 | 0        | 0        | 13900000 | 0        | 32400000 |
| 1.96E+08 | 1.27E+08 | 1.15E+08 | 2.16E+08 | 53400000 | 8.30E+07 | 1.60E+08 | 17500000 |
| 3.45E+08 | 4.98E+08 | 4.60E+08 | 6.90E+08 | 1.69E+08 | 2.68E+08 | 4.08E+08 | 82200000 |
| 3.78E+08 | 5.57E+08 | 4.60E+08 | 9.69E+08 | 1.90E+08 | 2.56E+08 | 6.05E+08 | 69700000 |
| 1.97E+08 | 4.25E+08 | 4.73E+08 | 5.84E+08 | 1.40E+08 | 2.53E+08 | 4.08E+08 | 1.67E+08 |
| 62700000 | 1.28E+08 | 1.37E+08 | 2.02E+08 | 43400000 | 65800000 | 1.33E+08 | 13200000 |
| 81600000 | 2.03E+08 | 2.49E+08 | 3.22E+08 | 1.07E+08 | 1.48E+08 | 2.12E+08 | 67500000 |
| 1.44E+08 | 1.67E+08 | 1.99E+08 | 3.16E+08 | 73800000 | 1.19E+08 | 2.29E+08 | 9233400  |
| 1.71E+08 | 45300000 | 41200000 | 93300000 | 13600000 | 14700000 | 45600000 | 34900000 |
| 91800000 | 1.11E+08 | 1.37E+08 | 1.52E+08 | 3.70E+07 | 61600000 | 62100000 | 3.20E+07 |
| 2181000  | 84500000 | 1.61E+08 | 3.50E+07 | 15600000 | 5.00E+07 | 56700000 | 2.81E+08 |
| 1.94E+08 | 3.21E+08 | 3.31E+08 | 4.73E+08 | 1.21E+08 | 2.01E+08 | 3.72E+08 | 37400000 |
| 89900000 | 20300000 | 22800000 | 67400000 | 7005200  | 9851800  | 42200000 | 9846100  |
| 40500000 | 14800000 | 32500000 | 45300000 | 7350200  | 14600000 | 16300000 | 5.00E+07 |
| 7.41E+08 | 9.72E+08 | 1.12E+09 | 1.10E+09 | 3.56E+08 | 7.44E+08 | 1.01E+09 | 74800000 |
| 1.32E+08 | 1.67E+08 | 1.55E+08 | 2.43E+08 | 75200000 | 1.08E+08 | 2.17E+08 | 77100000 |
| 54900000 | 1.51E+08 | 1.49E+08 | 2.53E+08 | 42300000 | 72100000 | 1.36E+08 | 8530800  |
| 1.63E+08 | 1.43E+08 | 1.58E+08 | 2.37E+08 | 60400000 | 80800000 | 2.10E+08 | 25700000 |
| 33400000 | 1.30E+08 | 96100000 | 1.65E+08 | 56200000 | 6.10E+07 | 86900000 | 4821800  |
| 1.30E+08 | 2.03E+08 | 1.85E+08 | 3.11E+08 | 67600000 | 1.07E+08 | 2.30E+08 | 7245700  |
| 1.75E+08 | 26400000 | 18600000 | 51700000 | 11900000 | 13700000 | 20300000 | 38600000 |
| 1.19E+08 | 2.03E+08 | 2.12E+08 | 2.60E+08 | 7.00E+07 | 84600000 | 1.70E+08 | 30800000 |
| 1.58E+08 | 3.39E+08 | 3.51E+08 | 4.35E+08 | 1.33E+08 | 1.92E+08 | 2.91E+08 | 17800000 |
| 1.27E+08 | 0        | 0        | 0        | 0        | 0        | 0        | 0        |
| 1.13E+08 | 1.48E+08 | 1.35E+08 | 2.47E+08 | 53700000 | 34600000 | 1.04E+08 | 5374800  |
| 0        | 4318600  | 51800000 | 0        | 0        | 29900000 | 0        | 6.50E+07 |
| 4.66E+08 | 6.23E+08 | 8.83E+08 | 7.37E+08 | 2.68E+08 | 5.22E+08 | 4.98E+08 | 59300000 |
| 1.88E+08 | 3.66E+08 | 3.41E+08 | 4.33E+08 | 1.37E+08 | 1.97E+08 | 2.74E+08 | 3.76E+08 |
| 96200000 | 1.69E+08 | 2.36E+08 | 3.40E+08 | 67600000 | 1.14E+08 | 1.86E+08 | 26700000 |
| 1.11E+08 | 57200000 | 42700000 | 1.05E+08 | 20100000 | 34700000 | 51300000 | 20300000 |
| 0        | 0        | 0        | 0        | 804680   | 1738400  | 0        | 3878900  |
| 6.00E+07 | 1.02E+08 | 1.06E+08 | 1.81E+08 | 21300000 | 72200000 | 1.22E+08 | 49900000 |
| 1.54E+08 | 2.14E+08 | 5.46E+08 | 4.42E+08 | 8.90E+07 | 1.89E+08 | 1.94E+08 | 60500000 |
| 98100000 | 1.09E+08 | 91200000 | 1.49E+08 | 18500000 | 4.70E+07 | 95700000 | 0        |
| 42100000 | 99200000 | 1.20E+08 | 1.66E+08 | 37200000 | 63100000 | 1.09E+08 | 22600000 |
| 1.02E+08 | 24100000 | 2.00E+07 | 68800000 | 7498500  | 11800000 | 36400000 | 4468900  |
| 56300000 | 1.83E+08 | 1.43E+08 | 2.08E+08 | 41300000 | 78600000 | 86800000 | 2.63E+08 |
| 1.25E+08 | 2.53E+08 | 3.07E+08 | 4.07E+08 | 1.12E+08 | 1.46E+08 | 2.24E+08 | 1.11E+08 |
| 1.65E+08 | 2.10E+08 | 1.48E+08 | 2.68E+08 | 53900000 | 79100000 | 1.87E+08 | 33600000 |
| 49400000 | 50200000 | 33300000 | 64900000 | 23800000 | 30700000 | 59200000 | 1246500  |
| 37800000 | 2.70E+07 | 19600000 | 39200000 | 10500000 | 10800000 | 28800000 | 1166000  |
| 44300000 | 51700000 | 1.02E+08 | 1.37E+08 | 36800000 | 6.80E+07 | 1.03E+08 | 7526200  |
| 88500000 | 71800000 | 32900000 | 73500000 | 21300000 | 36400000 | 1.05E+08 | 0        |
| 37900000 | 84500000 | 1.10E+08 | 1.12E+08 | 23500000 | 55700000 | 85600000 | 22200000 |
| 96400000 | 84900000 | 91300000 | 1.34E+08 | 4.00E+07 | 59700000 | 89900000 | 1.67E+08 |
| 16100000 | 0        | 0        | 1346800  | 0        | 1143200  | 1475300  | 0        |
| 3.20E+07 | 33800000 | 3.20E+07 | 36600000 | 6438600  | 3182700  | 12600000 | 6563400  |

|          |          |          |          |          |          |          |          |
|----------|----------|----------|----------|----------|----------|----------|----------|
| 76100000 | 72400000 | 7.50E+07 | 1.04E+08 | 19600000 | 31800000 | 50500000 | 23800000 |
| 66800000 | 1.58E+08 | 1.80E+08 | 2.39E+08 | 47700000 | 88900000 | 1.72E+08 | 45800000 |
| 62200000 | 66700000 | 1.31E+08 | 87200000 | 26200000 | 35700000 | 93200000 | 16900000 |
| 50100000 | 34600000 | 29800000 | 6.70E+07 | 11300000 | 22800000 | 51100000 | 7313900  |
| 1.06E+08 | 25200000 | 24100000 | 1.13E+08 | 11500000 | 21200000 | 54600000 | 0        |
| 60200000 | 90200000 | 82900000 | 1.40E+08 | 40100000 | 48300000 | 85600000 | 7126000  |
| 31800000 | 1.14E+08 | 1.22E+08 | 1.30E+08 | 33300000 | 5.30E+07 | 77700000 | 15700000 |
| 20800000 | 16500000 | 57800000 | 68100000 | 6097800  | 31200000 | 3.90E+07 | 5662900  |
| 41600000 | 1.05E+08 | 97200000 | 1.05E+08 | 3.60E+07 | 51500000 | 75900000 | 3265100  |
| 38400000 | 93400000 | 5.60E+07 | 3.90E+07 | 11200000 | 28300000 | 33200000 | 4.37E+08 |
| 1.32E+08 | 2.99E+08 | 2.86E+08 | 2.85E+08 | 88800000 | 1.70E+08 | 1.88E+08 | 1.06E+08 |
| 48800000 | 1.37E+08 | 91200000 | 1.76E+08 | 61400000 | 64700000 | 92700000 | 2.56E+08 |
| 39700000 | 7.30E+07 | 1.03E+08 | 1.59E+08 | 35100000 | 6.30E+07 | 69800000 | 10900000 |
| 19600000 | 48500000 | 43400000 | 72200000 | 20300000 | 39800000 | 33800000 | 4.50E+07 |
| 2603100  | 6193700  | 24500000 | 10100000 | 2146200  | 14300000 | 3797200  | 0        |
| 1.31E+08 | 67300000 | 53100000 | 88200000 | 14900000 | 18500000 | 45200000 | 17900000 |
| 15200000 | 0        | 6184600  | 0        | 0        | 2790600  | 0        | 4970700  |
| 23700000 | 7984900  | 0        | 14600000 | 5331400  | 7273700  | 11400000 | 6416000  |
| 33700000 | 54700000 | 50200000 | 1.03E+08 | 25700000 | 33400000 | 58300000 | 3059200  |
| 16900000 | 8491500  | 2.80E+07 | 31200000 | 964870   | 12700000 | 16100000 | 0        |
| 0        | 0        | 21700000 | 0        | 0        | 7467500  | 0        | 11900000 |
| 0        | 0        | 19500000 | 0        | 0        | 6947600  | 0        | 29800000 |
| 42300000 | 1.23E+08 | 84300000 | 72600000 | 37500000 | 40600000 | 56600000 | 17600000 |
| 83400000 | 38800000 | 4.90E+07 | 93600000 | 10300000 | 23200000 | 45300000 | 3846900  |
| 60700000 | 1.08E+08 | 1.17E+08 | 1.47E+08 | 41600000 | 59400000 | 95800000 | 19400000 |
| 27400000 | 22600000 | 1.10E+07 | 32100000 | 4089300  | 7587800  | 15600000 | 0        |
| 1.25E+08 | 1.40E+08 | 1.20E+08 | 2.24E+08 | 40200000 | 42200000 | 99400000 | 10500000 |
| 1.73E+08 | 1.41E+08 | 56700000 | 2.16E+08 | 50300000 | 56200000 | 1.55E+08 | 25600000 |
| 32200000 | 89400000 | 61800000 | 82800000 | 29700000 | 44200000 | 61200000 | 4742400  |
| 19900000 | 33300000 | 30600000 | 57500000 | 8909800  | 7832300  | 23700000 | 0        |
| 80200000 | 1.26E+08 | 1.56E+08 | 1.94E+08 | 56100000 | 94400000 | 97700000 | 5.13E+08 |
| 49500000 | 74100000 | 60100000 | 98400000 | 37700000 | 42500000 | 71500000 | 11900000 |
| 40700000 | 9.90E+07 | 86200000 | 1.01E+08 | 35800000 | 47200000 | 87500000 | 8797100  |
| 21100000 | 6036800  | 3231100  | 41600000 | 4426400  | 8062300  | 35300000 | 2877100  |
| 5.60E+07 | 66200000 | 1.09E+08 | 1.73E+08 | 36400000 | 39500000 | 60900000 | 6495400  |
| 24600000 | 83900000 | 75900000 | 1.31E+08 | 22100000 | 37400000 | 70900000 | 759440   |
| 20900000 | 6.50E+07 | 61100000 | 98500000 | 1.50E+07 | 40500000 | 74100000 | 0        |
| 25600000 | 19400000 | 4940300  | 21100000 | 18600000 | 20600000 | 36400000 | 22300000 |
| 47800000 | 28600000 | 34400000 | 64600000 | 6382200  | 10700000 | 28400000 | 0        |
| 87800000 | 28800000 | 51100000 | 74200000 | 8815900  | 27700000 | 51100000 | 2.50E+07 |
| 25200000 | 1.12E+08 | 94800000 | 1.20E+08 | 22300000 | 31600000 | 21600000 | 64300000 |
| 0        | 0        | 0        | 0        | 0        | 0        | 0        | 1433600  |
| 0        | 0        | 26600000 | 0        | 0        | 44800000 | 0        | 27100000 |
| 1.90E+07 | 0        | 8747700  | 7281400  | 0        | 0        | 3103300  | 0        |
| 19200000 | 24200000 | 24400000 | 33600000 | 6947300  | 9439200  | 13300000 | 0        |
| 17700000 | 67200000 | 5.00E+07 | 55200000 | 22700000 | 30500000 | 60700000 | 0        |
| 5.40E+07 | 9781600  | 51700000 | 57700000 | 8444000  | 24600000 | 10400000 | 0        |

|          |          |          |          |          |          |          |          |
|----------|----------|----------|----------|----------|----------|----------|----------|
| 34800000 | 87100000 | 85900000 | 1.29E+08 | 29100000 | 54300000 | 62600000 | 65100000 |
| 9667500  | 16600000 | 19300000 | 14900000 | 13300000 | 15800000 | 18500000 | 83400000 |
| 6641500  | 32300000 | 36700000 | 40900000 | 12600000 | 11500000 | 20900000 | 14700000 |
| 736750   | 22700000 | 41900000 | 26900000 | 8078900  | 21900000 | 14900000 | 2823300  |
| 37400000 | 59900000 | 96300000 | 90700000 | 13500000 | 36300000 | 57900000 | 1.96E+08 |
| 24200000 | 59700000 | 56500000 | 5.60E+07 | 29600000 | 34700000 | 48600000 | 0        |
| 27900000 | 14400000 | 9858300  | 1.50E+07 | 5466300  | 5939700  | 16300000 | 352390   |
| 40800000 | 98800000 | 1.03E+08 | 1.56E+08 | 30700000 | 57800000 | 1.00E+08 | 15400000 |
| 34700000 | 85500000 | 88100000 | 1.35E+08 | 34500000 | 54800000 | 85400000 | 58600000 |
| 31300000 | 1.03E+08 | 1.37E+08 | 1.64E+08 | 31800000 | 63600000 | 93800000 | 42300000 |
| 31900000 | 4.10E+07 | 6.00E+07 | 26600000 | 3177200  | 7.18E+08 | 28900000 | 4677000  |
| 36500000 | 1.05E+08 | 1.68E+08 | 1.73E+08 | 44200000 | 82700000 | 1.27E+08 | 73800000 |
| 10200000 | 13200000 | 6765500  | 19800000 | 6435200  | 3201100  | 14600000 | 28800000 |
| 29200000 | 1.50E+07 | 22800000 | 21800000 | 3805400  | 5571700  | 11700000 | 6098200  |
| 18700000 | 32300000 | 38700000 | 47200000 | 22400000 | 30200000 | 36900000 | 0        |
| 1.60E+07 | 62700000 | 43900000 | 78100000 | 2.10E+07 | 20800000 | 36300000 | 6833400  |
| 50200000 | 1.09E+08 | 81100000 | 1.11E+08 | 34200000 | 63100000 | 88200000 | 43900000 |
| 49800000 | 98500000 | 1.22E+08 | 1.85E+08 | 32300000 | 78600000 | 94900000 | 54700000 |
| 3.80E+07 | 62900000 | 39100000 | 91100000 | 23300000 | 31700000 | 69100000 | 0        |
| 12500000 | 0        | 0        | 0        | 590060   | 628370   | 4176400  | 0        |
| 11800000 | 15400000 | 2.80E+07 | 17200000 | 7615700  | 11800000 | 28900000 | 2.30E+08 |
| 80100000 | 1.46E+08 | 1.33E+08 | 1.90E+08 | 61700000 | 86800000 | 1.46E+08 | 21200000 |
| 33900000 | 60300000 | 6.50E+07 | 95300000 | 43400000 | 4.20E+07 | 68800000 | 3.20E+07 |
| 40600000 | 59600000 | 21700000 | 84800000 | 11400000 | 45900000 | 61300000 | 0        |
| 0        | 0        | 0        | 0        | 0        | 0        | 0        | 0        |
| 0        | 0        | 9587900  | 0        | 0        | 3519200  | 0        | 4007000  |
| 8289000  | 38100000 | 26900000 | 58300000 | 13900000 | 14900000 | 41900000 | 4408600  |
| 19600000 | 52400000 | 39500000 | 65300000 | 15700000 | 25700000 | 42800000 | 0        |
| 20800000 | 59400000 | 41200000 | 8.00E+07 | 22400000 | 31800000 | 3.70E+07 | 2997900  |
| 19800000 | 64700000 | 95600000 | 55100000 | 23800000 | 4.50E+07 | 4.20E+07 | 2.60E+07 |
| 1896600  | 1.50E+07 | 17200000 | 6663500  | 2748800  | 10400000 | 4485700  | 0        |
| 24900000 | 4201300  | 5065000  | 19700000 | 0        | 0        | 9090200  | 0        |
| 1.80E+07 | 31400000 | 26300000 | 5.10E+07 | 22800000 | 19800000 | 25400000 | 47400000 |
| 15500000 | 9580800  | 12900000 | 28600000 | 1608800  | 4944300  | 20700000 | 10100000 |
| 27100000 | 3622000  | 3566500  | 5891600  | 960000   | 0        | 6452100  | 0        |
| 8400400  | 0        | 0        | 5219600  | 0        | 0        | 0        | 0        |
| 14900000 | 38900000 | 25200000 | 50300000 | 15100000 | 17200000 | 15600000 | 0        |
| 1.50E+07 | 29200000 | 29300000 | 46500000 | 13600000 | 16600000 | 27600000 | 17100000 |
| 32400000 | 46200000 | 34900000 | 86200000 | 10100000 | 6927300  | 22900000 | 0        |
| 18500000 | 3.50E+07 | 31100000 | 47100000 | 13400000 | 12600000 | 24900000 | 773440   |
| 44400000 | 22600000 | 18200000 | 52800000 | 22300000 | 9891500  | 25300000 | 0        |
| 1.40E+07 | 38200000 | 30900000 | 39800000 | 12900000 | 12100000 | 26400000 | 0        |
| 19300000 | 53800000 | 52700000 | 70900000 | 17700000 | 16500000 | 20800000 | 0        |
| 1.25E+08 | 2.52E+08 | 8.90E+07 | 77400000 | 42800000 | 1.16E+08 | 85900000 | 12600000 |
| 6696200  | 0        | 2776100  | 0        | 0        | 4284700  | 0        | 521180   |
| 13200000 | 8538100  | 27200000 | 26300000 | 3832600  | 5684500  | 15800000 | 0        |
| 19900000 | 32700000 | 46800000 | 86300000 | 23600000 | 33800000 | 49800000 | 11700000 |

|          |          |          |          |          |          |          |          |
|----------|----------|----------|----------|----------|----------|----------|----------|
| 17800000 | 24600000 | 16600000 | 27800000 | 8027000  | 16900000 | 20700000 | 0        |
| 27400000 | 23600000 | 13700000 | 27900000 | 1.20E+07 | 15600000 | 32400000 | 0        |
| 30200000 | 24300000 | 1886300  | 31200000 | 9113600  | 5003300  | 1.40E+07 | 0        |
| 0        | 0        | 1.19E+08 | 0        | 0        | 45200000 | 0        | 72800000 |
| 4402400  | 15100000 | 1.40E+07 | 7009400  | 6505500  | 15900000 | 9443500  | 0        |
| 22900000 | 8483500  | 11500000 | 11900000 | 3139800  | 3554900  | 5421400  | 4907700  |
| 3835500  | 14100000 | 10500000 | 13700000 | 3236100  | 5970800  | 14300000 | 0        |
| 27900000 | 73700000 | 62200000 | 93200000 | 28700000 | 4.80E+07 | 64400000 | 2088900  |
| 17100000 | 52100000 | 43300000 | 8.00E+07 | 14400000 | 23100000 | 44700000 | 0        |
| 9039300  | 43100000 | 44700000 | 39600000 | 10500000 | 15200000 | 27700000 | 0        |
| 6983300  | 29400000 | 24500000 | 28100000 | 7978200  | 19800000 | 26900000 | 0        |
| 15600000 | 11600000 | 37900000 | 37400000 | 6111600  | 7900800  | 16800000 | 0        |
| 0        | 0        | 0        | 0        | 0        | 0        | 0        | 0        |
| 40900000 | 53200000 | 47700000 | 58800000 | 39300000 | 1.90E+07 | 4.50E+07 | 1.11E+08 |
| 57500000 | 54800000 | 92700000 | 1.61E+08 | 4.10E+07 | 60800000 | 1.12E+08 | 16200000 |
| 8902600  | 10900000 | 12600000 | 17600000 | 5478200  | 9567800  | 20500000 | 1759600  |
| 1100100  | 11200000 | 8365900  | 26200000 | 1170000  | 1118400  | 5269200  | 0        |
| 10500000 | 0        | 0        | 3145800  | 0        | 0        | 0        | 0        |
| 28700000 | 84900000 | 53100000 | 64400000 | 9269100  | 25500000 | 21700000 | 0        |
| 27600000 | 79700000 | 66400000 | 95900000 | 21900000 | 38700000 | 51500000 | 0        |
| 18100000 | 0        | 3158100  | 0        | 0        | 0        | 4235100  | 0        |
| 82500000 | 1.05E+08 | 82600000 | 1.06E+08 | 7400700  | 42200000 | 67900000 | 0        |
| 1.15E+08 | 3.31E+08 | 1.26E+09 | 3.34E+08 | 1.08E+08 | 8.14E+08 | 2.86E+08 | 1.41E+09 |
| 0        | 0        | 0        | 0        | 0        | 0        | 0        | 0        |
| 21300000 | 10100000 | 10800000 | 28400000 | 7110800  | 7242500  | 25300000 | 0        |
| 15400000 | 5321200  | 0        | 16400000 | 3311900  | 2335300  | 5649200  | 0        |
| 12100000 | 0        | 0        | 2226100  | 1482700  | 2874300  | 0        | 9237400  |
| 14800000 | 5558000  | 1639300  | 18500000 | 2061100  | 11300000 | 9234500  | 0        |
| 4505500  | 0        | 0        | 10400000 | 0        | 788960   | 1688500  | 0        |
| 0        | 0        | 1570700  | 0        | 0        | 0        | 0        | 74200000 |
| 12700000 | 16900000 | 22800000 | 24400000 | 6469700  | 7925800  | 9370200  | 1.01E+08 |
| 20800000 | 1.90E+07 | 16600000 | 43600000 | 10300000 | 18900000 | 28600000 | 0        |
| 0        | 0        | 0        | 0        | 0        | 0        | 0        | 0        |
| 0        | 0        | 0        | 0        | 904610   | 0        | 0        | 0        |
| 1.50E+07 | 42200000 | 14500000 | 20800000 | 4798700  | 1.70E+07 | 2.80E+07 | 2794600  |
| 2.10E+07 | 27100000 | 12800000 | 16700000 | 13900000 | 11900000 | 28900000 | 2150100  |
| 16100000 | 15700000 | 28500000 | 54300000 | 14600000 | 2.10E+07 | 33400000 | 6833800  |
| 1631300  | 0        | 4320800  | 4144200  | 1117000  | 2833600  | 4273700  | 6889500  |
| 11900000 | 25900000 | 34400000 | 30500000 | 6364900  | 20200000 | 22400000 | 6172000  |
| 0        | 0        | 0        | 0        | 0        | 0        | 0        | 0        |
| 52700000 | 60900000 | 22400000 | 35500000 | 1.00E+07 | 14100000 | 66300000 | 191480   |
| 14800000 | 20200000 | 3516900  | 19500000 | 8283800  | 10400000 | 10100000 | 0        |
| 24400000 | 14200000 | 15700000 | 42100000 | 11900000 | 18200000 | 16400000 | 0        |
| 25700000 | 40300000 | 36400000 | 50300000 | 26200000 | 28700000 | 43300000 | 0        |
| 0        | 0        | 0        | 0        | 0        | 0        | 0        | 0        |
| 38100000 | 22600000 | 1.90E+07 | 85300000 | 8803100  | 26900000 | 3.00E+07 | 0        |
| 5524300  | 0        | 0        | 474870   | 0        | 0        | 0        | 0        |

|          |          |          |          |          |          |          |          |
|----------|----------|----------|----------|----------|----------|----------|----------|
| 7314500  | 86900000 | 5485000  | 14300000 | 6777400  | 6557800  | 12600000 | 0        |
| 9803200  | 1.20E+07 | 13600000 | 22800000 | 2837000  | 6438900  | 11700000 | 0        |
| 13500000 | 4.50E+07 | 46400000 | 61600000 | 8767200  | 16500000 | 22100000 | 14300000 |
| 0        | 0        | 0        | 0        | 4669200  | 0        | 1424900  | 0        |
| 1.10E+07 | 16500000 | 16600000 | 17600000 | 2814200  | 5571700  | 9094600  | 0        |
| 1436300  | 10600000 | 9384000  | 16400000 | 5002200  | 9497000  | 11200000 | 608880   |
| 6914100  | 17300000 | 28100000 | 35700000 | 18600000 | 13200000 | 32600000 | 11100000 |
| 0        | 0        | 0        | 0        | 0        | 0        | 0        | 0        |
| 20300000 | 32200000 | 45200000 | 47500000 | 5138200  | 14100000 | 28500000 | 14900000 |
| 3.46E+09 | 4.78E+09 | 4.88E+09 | 7.50E+09 | 2.37E+09 | 2.69E+09 | 4.28E+09 | 1.10E+09 |
| 20300000 | 27600000 | 40100000 | 47100000 | 14900000 | 12600000 | 28200000 | 0        |
| 1974500  | 11600000 | 2226000  | 22900000 | 6871300  | 6882900  | 11400000 | 0        |
| 6031700  | 3731400  | 5074600  | 2626700  | 3386400  | 4958300  | 9565700  | 0        |
| 12800000 | 0        | 0        | 0        | 0        | 0        | 2548300  | 0        |
| 13700000 | 38200000 | 3.40E+07 | 52900000 | 11200000 | 18500000 | 22100000 | 0        |
| 13900000 | 18300000 | 17500000 | 23800000 | 10800000 | 9436200  | 16100000 | 2029300  |
| 47700000 | 6.50E+07 | 91100000 | 97200000 | 32900000 | 37800000 | 72100000 | 0        |
| 9856000  | 22500000 | 23400000 | 29800000 | 7952400  | 11800000 | 12900000 | 0        |
| 7451300  | 8165600  | 6257700  | 11300000 | 1885700  | 2415800  | 8511900  | 0        |
| 8611700  | 12700000 | 19600000 | 27300000 | 7534700  | 13700000 | 11300000 | 0        |
| 1.10E+07 | 29500000 | 18800000 | 1.60E+07 | 2351800  | 7513600  | 11200000 | 0        |
| 2560900  | 6091500  | 6446400  | 8855400  | 2225000  | 4011400  | 6055400  | 424240   |
| 6242000  | 12700000 | 9143800  | 16800000 | 8371400  | 11400000 | 12500000 | 0        |
| 5875300  | 0        | 0        | 0        | 1068600  | 2271000  | 3032000  | 0        |
| 6358000  | 25100000 | 15500000 | 26500000 | 4859100  | 8114200  | 11600000 | 391010   |
| 49100000 | 80800000 | 1.08E+08 | 1.43E+08 | 34600000 | 42400000 | 53100000 | 52600000 |
| 8107100  | 21400000 | 22500000 | 31800000 | 9399600  | 9941800  | 20500000 | 0        |
| 8203300  | 0        | 0        | 0        | 0        | 0        | 0        | 0        |
| 16100000 | 16100000 | 3794800  | 14600000 | 7221800  | 21300000 | 36200000 | 0        |
| 7069800  | 0        | 0        | 0        | 0        | 0        | 0        | 0        |
| 1.20E+07 | 0        | 0        | 12100000 | 0        | 0        | 6030000  | 0        |
| 21900000 | 2.70E+07 | 21100000 | 34900000 | 8446600  | 15200000 | 2.10E+07 | 1784500  |
| 9076500  | 0        | 0        | 0        | 0        | 0        | 0        | 0        |
| 2476100  | 2104000  | 2670400  | 0        | 1268100  | 1970000  | 1555000  | 0        |
| 19800000 | 28600000 | 31100000 | 44100000 | 883950   | 1507600  | 2994600  | 0        |
| 7147500  | 0        | 8214100  | 12100000 | 0        | 0        | 647410   | 0        |
| 0        | 0        | 0        | 0        | 0        | 0        | 0        | 0        |
| 8561500  | 41500000 | 27500000 | 38600000 | 12100000 | 1.70E+07 | 36100000 | 5778800  |
| 9502900  | 30800000 | 18300000 | 52800000 | 4313200  | 5237800  | 1.20E+07 | 0        |
| 11300000 | 24600000 | 27500000 | 49800000 | 15500000 | 23500000 | 40400000 | 10100000 |
| 9180200  | 4610700  | 4886400  | 19200000 | 0        | 0        | 0        | 0        |
| 20700000 | 32800000 | 27300000 | 48600000 | 18500000 | 25800000 | 50800000 | 3572600  |
| 2082400  | 6335700  | 11700000 | 10900000 | 5205000  | 11700000 | 12200000 | 1473300  |
| 19400000 | 29500000 | 27700000 | 7.50E+07 | 23500000 | 28600000 | 24500000 | 8011500  |
| 11600000 | 31100000 | 47600000 | 59600000 | 8656400  | 19100000 | 28800000 | 12900000 |
| 1871200  | 13600000 | 15100000 | 24300000 | 6502700  | 9883600  | 1.30E+07 | 0        |
| 9297700  | 12900000 | 12600000 | 15800000 | 9894000  | 10400000 | 24800000 | 3442900  |

|          |          |          |          |          |          |          |          |
|----------|----------|----------|----------|----------|----------|----------|----------|
| 14800000 | 5975700  | 2408800  | 8540500  | 0        | 0        | 0        | 0        |
| 38600000 | 35800000 | 49800000 | 76100000 | 15700000 | 15200000 | 29600000 | 5250100  |
| 12300000 | 0        | 0        | 0        | 0        | 0        | 0        | 0        |
| 2892000  | 18100000 | 14800000 | 46500000 | 9790700  | 12600000 | 13200000 | 0        |
| 16100000 | 21700000 | 32300000 | 44600000 | 13100000 | 1.90E+07 | 28400000 | 0        |
| 0        | 0        | 0        | 0        | 0        | 0        | 0        | 362890   |
| 6843200  | 11200000 | 20200000 | 20300000 | 4846700  | 15300000 | 17500000 | 0        |
| 8333600  | 14700000 | 3265700  | 22200000 | 7814400  | 4549800  | 11400000 | 0        |
| 12700000 | 1.10E+07 | 9371500  | 21800000 | 1510600  | 1617600  | 12200000 | 0        |
| 2899700  | 0        | 3386300  | 5054000  | 0        | 0        | 4600200  | 0        |
| 0        | 0        | 12100000 | 11300000 | 0        | 1867800  | 2732100  | 16400000 |
| 1021300  | 0        | 0        | 0        | 0        | 0        | 0        | 0        |
| 0        | 0        | 0        | 0        | 0        | 1451200  | 0        | 0        |
| 10800000 | 20900000 | 23400000 | 28900000 | 4385100  | 1342300  | 1.40E+07 | 0        |
| 4339600  | 9587200  | 6962800  | 9054600  | 4626400  | 12700000 | 17100000 | 0        |
| 8312500  | 19100000 | 40200000 | 35100000 | 8737800  | 20100000 | 20400000 | 1389300  |
| 0        | 0        | 0        | 600960   | 660020   | 0        | 0        | 0        |
| 8870500  | 2.00E+07 | 8165900  | 10600000 | 9714600  | 10700000 | 12500000 | 0        |
| 0        | 14100000 | 13300000 | 28900000 | 3937400  | 4321700  | 6077200  | 0        |
| 10500000 | 0        | 0        | 0        | 0        | 0        | 0        | 0        |
| 15200000 | 67900000 | 50700000 | 67900000 | 18200000 | 22700000 | 33900000 | 0        |
| 1175500  | 15300000 | 9482200  | 1.70E+07 | 5279200  | 11400000 | 6613800  | 0        |
| 14100000 | 23800000 | 14100000 | 26100000 | 7962800  | 14300000 | 22700000 | 6287000  |
| 5048200  | 0        | 0        | 0        | 0        | 0        | 0        | 0        |
| 881180   | 5410200  | 2973600  | 2663500  | 735970   | 4398900  | 9439700  | 0        |
| 11900000 | 14600000 | 13100000 | 21100000 | 9670300  | 11300000 | 16900000 | 0        |
| 27200000 | 9762400  | 18600000 | 12500000 | 4922400  | 13100000 | 18600000 | 0        |
| 13900000 | 21200000 | 17700000 | 24300000 | 11500000 | 15200000 | 22300000 | 0        |
| 8563400  | 248860   | 3108500  | 16100000 | 0        | 366390   | 9370000  | 0        |
| 819870   | 0        | 0        | 0        | 0        | 0        | 0        | 0        |
| 3115100  | 0        | 0        | 0        | 717180   | 665660   | 1159900  | 0        |
| 39100000 | 54800000 | 59800000 | 1.44E+08 | 12600000 | 45600000 | 8.10E+07 | 0        |
| 14600000 | 0        | 0        | 0        | 0        | 0        | 0        | 0        |
| 15900000 | 36100000 | 21100000 | 12200000 | 4855100  | 6740700  | 16400000 | 0        |
| 3648700  | 6462600  | 2040000  | 4334900  | 1197200  | 2299900  | 2336200  | 0        |
| 13200000 | 2.40E+07 | 20200000 | 21500000 | 10900000 | 16700000 | 30800000 | 0        |
| 0        | 0        | 0        | 0        | 0        | 0        | 0        | 0        |
| 3204200  | 2063900  | 0        | 5963500  | 2952400  | 3103200  | 7053100  | 0        |
| 27100000 | 15300000 | 15200000 | 24500000 | 6059600  | 8747700  | 15300000 | 5250100  |
| 24100000 | 42700000 | 37500000 | 47900000 | 0        | 20500000 | 28200000 | 1.06E+08 |
| 1.10E+07 | 4374000  | 2498200  | 6008100  | 1514300  | 1842700  | 3671900  | 0        |
| 4720600  | 3215100  | 0        | 8322700  | 1131900  | 0        | 5951100  | 0        |
| 18700000 | 36900000 | 19600000 | 36100000 | 6266800  | 8485400  | 12300000 | 0        |
| 2520200  | 0        | 0        | 0        | 0        | 0        | 0        | 0        |
| 0        | 6269600  | 0        | 0        | 0        | 0        | 0        | 0        |
| 405950   | 1129600  | 1632000  | 0        | 599660   | 0        | 0        | 0        |
| 12800000 | 3.00E+07 | 4.30E+07 | 41500000 | 17400000 | 16100000 | 20900000 | 3613300  |

|          |          |          |          |          |          |          |         |
|----------|----------|----------|----------|----------|----------|----------|---------|
| 3264200  | 12300000 | 1.30E+07 | 8388600  | 4285600  | 6309800  | 6692900  | 131250  |
| 3987000  | 3827800  | 10200000 | 10500000 | 2019200  | 5598400  | 9630800  | 0       |
| 10300000 | 14600000 | 26700000 | 2610000  | 4384700  | 4633200  | 13300000 | 0       |
| 13800000 | 9418600  | 27400000 | 14100000 | 10700000 | 15400000 | 27900000 | 8514800 |
| 4439500  | 14800000 | 12900000 | 17600000 | 4188800  | 4380500  | 10700000 | 0       |
| 10500000 | 15200000 | 10500000 | 30600000 | 3200400  | 11500000 | 34300000 | 0       |
| 10100000 | 17700000 | 1.80E+07 | 21700000 | 6506200  | 8526000  | 19800000 | 1013700 |
| 3875900  | 13300000 | 16800000 | 19400000 | 9344300  | 12700000 | 15800000 | 0       |
| 0        | 0        | 0        | 0        | 0        | 0        | 0        | 0       |
| 0        | 16300000 | 14400000 | 27800000 | 9107200  | 18600000 | 27200000 | 5410900 |
| 2506900  | 14600000 | 13100000 | 15200000 | 3718400  | 8173700  | 7884700  | 0       |
| 14300000 | 2665200  | 0        | 6878200  | 4231800  | 955740   | 12100000 | 0       |
| 499650   | 0        | 0        | 0        | 0        | 0        | 0        | 0       |
| 0        | 10300000 | 9705000  | 13600000 | 2101100  | 0        | 5511800  | 0       |
| 9636600  | 0        | 0        | 0        | 0        | 0        | 0        | 0       |
| 1904600  | 2877400  | 6329100  | 5330600  | 0        | 0        | 0        | 1262100 |
| 3477000  | 0        | 0        | 3828400  | 0        | 2542500  | 0        | 0       |
| 3070100  | 0        | 0        | 0        | 0        | 0        | 0        | 0       |
| 11800000 | 11800000 | 10700000 | 26100000 | 5589300  | 8082000  | 25800000 | 0       |
| 0        | 0        | 0        | 0        | 0        | 0        | 0        | 0       |
| 0        | 0        | 0        | 0        | 0        | 0        | 0        | 3279600 |
| 5475800  | 13100000 | 8206600  | 16900000 | 8263500  | 10200000 | 22400000 | 1889100 |
| 698380   | 3313700  | 4353900  | 6158300  | 1571200  | 760730   | 1.20E+07 | 0       |
| 3571400  | 0        | 0        | 0        | 0        | 0        | 0        | 0       |
| 1367100  | 10900000 | 9290300  | 14100000 | 1710900  | 5350500  | 8926800  | 0       |
| 1658000  | 9294300  | 5006700  | 23500000 | 1379600  | 899380   | 4580200  | 0       |
| 0        | 13700000 | 9324100  | 12300000 | 1896100  | 1831000  | 10300000 | 0       |
| 0        | 0        | 0        | 0        | 0        | 0        | 0        | 0       |
| 1668900  | 12400000 | 6294200  | 27200000 | 5900200  | 4708500  | 6879600  | 0       |
| 4126600  | 0        | 0        | 0        | 0        | 0        | 0        | 0       |
| 0        | 0        | 0        | 0        | 0        | 0        | 0        | 0       |
| 563050   | 0        | 1145600  | 5340000  | 2757500  | 2348500  | 4850200  | 0       |
| 2898100  | 7743100  | 7811900  | 7944100  | 3050000  | 0        | 0        | 0       |
| 0        | 5751400  | 0        | 6751300  | 0        | 0        | 1047000  | 0       |
| 3490300  | 0        | 0        | 0        | 0        | 0        | 0        | 0       |
| 2108900  | 5981100  | 6476200  | 8348100  | 1741200  | 2373800  | 2844300  | 0       |
| 3620700  | 776520   | 0        | 0        | 3907200  | 7101200  | 7224600  | 0       |
| 16300000 | 0        | 0        | 0        | 0        | 0        | 0        | 0       |
| 0        | 0        | 0        | 0        | 0        | 306070   | 0        | 0       |
| 2411500  | 8516300  | 9920800  | 13400000 | 3233000  | 2949600  | 5800200  | 1576900 |
| 8665600  | 1253100  | 1733500  | 9409800  | 8437800  | 10500000 | 20700000 | 0       |
| 502890   | 658300   | 0        | 483880   | 467450   | 0        | 2237200  | 715710  |
| 6989400  | 9159800  | 0        | 2976000  | 2536000  | 3463200  | 1049200  | 0       |
| 29400000 | 0        | 0        | 0        | 0        | 0        | 0        | 0       |
| 12400000 | 0        | 0        | 0        | 0        | 0        | 0        | 0       |
| 436160   | 0        | 0        | 0        | 0        | 0        | 684480   | 0       |
| 1863600  | 5602500  | 8245800  | 9224900  | 4408400  | 1963000  | 5121700  | 0       |

|          |          |          |          |          |          |          |          |
|----------|----------|----------|----------|----------|----------|----------|----------|
| 2066500  | 11700000 | 35400000 | 8488900  | 5833300  | 20800000 | 8503100  | 0        |
| 3248100  | 18800000 | 12300000 | 16400000 | 8164400  | 3750400  | 16500000 | 0        |
| 9883100  | 10900000 | 11100000 | 11600000 | 4174600  | 7325000  | 11800000 | 0        |
| 1359500  | 8797400  | 10700000 | 10300000 | 3226700  | 2319200  | 8039600  | 0        |
| 5433500  | 2928200  | 0        | 4492200  | 0        | 0        | 0        | 0        |
| 0        | 0        | 13500000 | 0        | 0        | 0        | 0        | 0        |
| 8030100  | 19600000 | 8933000  | 12800000 | 4962000  | 5431700  | 10700000 | 2740100  |
| 2759600  | 3894800  | 5027600  | 6905000  | 3715200  | 4008900  | 5506400  | 0        |
| 4799700  | 0        | 0        | 5046400  | 0        | 0        | 0        | 0        |
| 0        | 10300000 | 3235000  | 4940000  | 1243500  | 1916600  | 2384600  | 0        |
| 16200000 | 2099600  | 0        | 0        | 0        | 0        | 0        | 0        |
| 943550   | 0        | 0        | 0        | 0        | 0        | 0        | 0        |
| 3323800  | 4108600  | 0        | 12800000 | 3450900  | 5396100  | 6910300  | 0        |
| 0        | 0        | 0        | 0        | 0        | 0        | 0        | 0        |
| 3916100  | 3740300  | 3645600  | 7675800  | 3582200  | 6743100  | 4687200  | 0        |
| 3.20E+07 | 47400000 | 60400000 | 1.60E+07 | 8337500  | 9283600  | 3.20E+07 | 20900000 |
| 3296300  | 0        | 0        | 0        | 0        | 0        | 0        | 0        |
| 2936700  | 0        | 0        | 4492800  | 1561300  | 1842700  | 5081600  | 0        |
| 5595100  | 9488100  | 13500000 | 16800000 | 4615600  | 4938600  | 7341400  | 0        |
| 0        | 0        | 0        | 0        | 0        | 0        | 0        | 0        |
| 0        | 0        | 0        | 0        | 0        | 0        | 0        | 0        |
| 10800000 | 7171200  | 13800000 | 15600000 | 5522000  | 7959700  | 23700000 | 30900000 |
| 0        | 585460   | 1179800  | 1421700  | 0        | 1519000  | 2003600  | 0        |
| 4708600  | 12200000 | 19500000 | 22400000 | 4390300  | 7334100  | 11700000 | 0        |
| 2971100  | 4021200  | 0        | 0        | 1784400  | 2613600  | 4585800  | 0        |
| 3554400  | 3375500  | 4056000  | 4283300  | 2776600  | 2377700  | 3421400  | 0        |
| 1794400  | 7228100  | 7196300  | 15900000 | 8833100  | 14300000 | 9233200  | 24500000 |
| 2119200  | 1758800  | 2713400  | 4362800  | 961130   | 1412800  | 4114100  | 754270   |
| 3208500  | 9854800  | 8104300  | 1.10E+07 | 3911300  | 5030100  | 6835100  | 0        |
| 5899600  | 0        | 2541200  | 3918800  | 0        | 0        | 1379200  | 0        |
| 2977900  | 2789800  | 3641000  | 0        | 863200   | 0        | 0        | 0        |
| 1201600  | 2813200  | 1484900  | 2046500  | 1228400  | 1435400  | 2388900  | 0        |
| 3911500  | 0        | 0        | 0        | 0        | 0        | 0        | 0        |
| 8618500  | 26600000 | 22900000 | 42100000 | 12700000 | 16800000 | 14300000 | 0        |
| 11100000 | 0        | 0        | 0        | 0        | 0        | 0        | 0        |
| 4418400  | 15300000 | 6387200  | 19100000 | 4299000  | 5379500  | 6462300  | 0        |
| 4700900  | 5953000  | 8588500  | 3664900  | 2654800  | 4824600  | 6349500  | 0        |
| 1.70E+07 | 27200000 | 43600000 | 65300000 | 5497700  | 20100000 | 37200000 | 0        |
| 543000   | 0        | 209250   | 0        | 0        | 0        | 334400   | 0        |
| 3997700  | 0        | 0        | 1511200  | 0        | 0        | 1895700  | 0        |
| 5523800  | 10500000 | 10900000 | 23200000 | 3601700  | 4429800  | 9175800  | 0        |
| 13500000 | 6958200  | 7241900  | 0        | 4859600  | 9561700  | 7828700  | 0        |
| 3335100  | 4602200  | 2706200  | 0        | 3723100  | 6032300  | 5308300  | 0        |
| 579860   | 2552900  | 2051500  | 4417200  | 885920   | 1177300  | 3290900  | 0        |
| 0        | 0        | 0        | 0        | 0        | 0        | 0        | 0        |
| 5869400  | 16400000 | 12800000 | 1.90E+07 | 4918100  | 10100000 | 12800000 | 0        |
| 7494500  | 0        | 1.10E+07 | 6005600  | 4251000  | 6614600  | 7923400  | 0        |



|          |          |          |          |         |         |          |         |
|----------|----------|----------|----------|---------|---------|----------|---------|
| 3888200  | 16500000 | 3807900  | 26600000 | 2227000 | 4258400 | 24300000 | 0       |
| 5198500  | 2731900  | 4679800  | 5857800  | 0       | 3305200 | 4683300  | 0       |
| 578000   | 1067100  | 0        | 0        | 513390  | 0       | 1029300  | 0       |
| 6204600  | 20300000 | 17400000 | 20600000 | 4015200 | 3585900 | 9549300  | 4691300 |
| 0        | 7342100  | 0        | 0        | 0       | 1550100 | 1652000  | 0       |
| 6272100  | 7631900  | 8629300  | 13700000 | 3360100 | 4583600 | 8319100  | 0       |
| 5989900  | 3185400  | 2438200  | 4538300  | 0       | 0       | 0        | 0       |
| 1719800  | 3674800  | 0        | 5029300  | 0       | 0       | 0        | 0       |
| 0        | 0        | 0        | 0        | 0       | 0       | 0        | 0       |
| 781030   | 538260   | 459130   | 980210   | 261580  | 0       | 862790   | 0       |
| 2011500  | 0        | 1154900  | 3301600  | 488740  | 0       | 1183900  | 0       |
| 371280   | 0        | 0        | 4464000  | 0       | 0       | 0        | 0       |
| 3422300  | 3761100  | 0        | 6518500  | 0       | 0       | 0        | 834560  |
| 0        | 0        | 0        | 0        | 0       | 0       | 3467600  | 0       |
| 6028300  | 4526600  | 5797600  | 17100000 | 2674800 | 2299400 | 13800000 | 0       |
| 3841100  | 6566200  | 6059900  | 9845100  | 1881100 | 2783600 | 6773000  | 0       |
| 1256900  | 9225500  | 16300000 | 4263400  | 1213300 | 8809300 | 5816200  | 0       |
| 1747200  | 4094400  | 4422800  | 6126600  | 3217300 | 1768300 | 0        | 0       |
| 3753300  | 15100000 | 12200000 | 10600000 | 5274900 | 0       | 0        | 0       |
| 0        | 0        | 0        | 0        | 0       | 0       | 0        | 0       |
| 7380500  | 0        | 0        | 0        | 0       | 0       | 0        | 0       |
| 2424700  | 2.00E+07 | 15500000 | 7524900  | 7394900 | 8529500 | 14900000 | 0       |
| 4435800  | 9485900  | 2936600  | 5128300  | 1242800 | 2584800 | 2729100  | 0       |
| 11700000 | 22100000 | 14800000 | 19700000 | 3076300 | 8955900 | 2202400  | 4771100 |
| 1153900  | 2041300  | 5089400  | 6615400  | 1318100 | 5837300 | 5160700  | 0       |
| 2172300  | 2619200  | 0        | 0        | 0       | 1814800 | 4440100  | 0       |
| 4633200  | 4053200  | 5094400  | 15300000 | 2294200 | 2374300 | 6036300  | 0       |
| 17500000 | 13900000 | 19700000 | 28300000 | 1635800 | 2283000 | 0        | 0       |
| 2076700  | 2573600  | 488140   | 4155200  | 2129800 | 3405500 | 0        | 0       |
| 3852200  | 4128800  | 3114300  | 5790500  | 1340500 | 0       | 0        | 0       |
| 3753600  | 12300000 | 9845300  | 18900000 | 3395400 | 7989400 | 9468200  | 0       |
| 820570   | 1042700  | 0        | 2107100  | 1214100 | 671150  | 1127900  | 0       |
| 0        | 0        | 0        | 2734900  | 0       | 1535700 | 2406800  | 0       |
| 798900   | 8766600  | 4300900  | 17600000 | 4203100 | 6498300 | 6929500  | 6874500 |
| 0        | 7875000  | 0        | 0        | 3055300 | 1795600 | 6435900  | 0       |
| 0        | 16500000 | 4038500  | 0        | 3861400 | 4013200 | 2936400  | 0       |
| 35300000 | 4.50E+07 | 0        | 0        | 7145900 | 9763300 | 59600000 | 0       |
| 0        | 3780100  | 1173200  | 2907000  | 423550  | 3705700 | 4251500  | 0       |
| 0        | 2816200  | 4868400  | 1.40E+07 | 2041400 | 0       | 0        | 0       |
| 3724100  | 0        | 0        | 0        | 0       | 0       | 0        | 2543200 |
| 0        | 0        | 0        | 0        | 0       | 0       | 0        | 0       |
| 0        | 3672700  | 5168100  | 5897600  | 3141600 | 2262100 | 0        | 0       |
| 3141900  | 0        | 0        | 0        | 0       | 0       | 0        | 0       |
| 620650   | 1601900  | 5339000  | 7162900  | 3136900 | 4326100 | 9075700  | 0       |
| 2032000  | 2666600  | 0        | 4457600  | 5046000 | 8757300 | 3380800  | 5107400 |
| 2728900  | 0        | 0        | 0        | 0       | 0       | 0        | 0       |
| 0        | 2666600  | 1782600  | 10200000 | 4651500 | 6178800 | 11900000 | 0       |

|          |          |          |          |          |          |          |          |   |
|----------|----------|----------|----------|----------|----------|----------|----------|---|
| 2055000  | 0        | 0        | 0        | 0        | 0        | 0        | 0        | 0 |
| 0        | 0        | 0        | 0        | 0        | 0        | 0        | 0        | 0 |
| 2309000  | 3610200  | 0        | 0        | 751510   | 1756500  | 0        | 0        | 0 |
| 1063800  | 2626600  | 406300   | 1152500  | 388010   | 775830   | 2700700  | 0        | 0 |
| 1758000  | 14900000 | 14200000 | 3.20E+07 | 4172500  | 0        | 1669800  | 0        | 0 |
| 3631100  | 4632900  | 4359400  | 4825000  | 0        | 0        | 2625600  | 0        | 0 |
| 2045900  | 8409700  | 6915100  | 12400000 | 2989000  | 902680   | 3943700  | 0        | 0 |
| 1400500  | 1683500  | 6905800  | 2770700  | 408440   | 0        | 958000   | 10700000 | 0 |
| 0        | 0        | 0        | 0        | 0        | 0        | 0        | 0        | 0 |
| 8251800  | 0        | 0        | 0        | 996620   | 949080   | 11400000 | 0        | 0 |
| 6234900  | 3740500  | 3933800  | 0        | 1682700  | 0        | 0        | 0        | 0 |
| 1787500  | 0        | 0        | 4966600  | 0        | 0        | 3988300  | 0        | 0 |
| 7252900  | 22300000 | 5904400  | 7142700  | 9328700  | 9584900  | 18300000 | 0        | 0 |
| 0        | 0        | 0        | 0        | 0        | 0        | 0        | 0        | 0 |
| 5288400  | 7073500  | 16400000 | 19300000 | 6328900  | 9112400  | 10400000 | 9881700  | 0 |
| 0        | 5231700  | 9907700  | 7980600  | 1165500  | 1838000  | 5707800  | 887960   | 0 |
| 0        | 409880   | 0        | 0        | 0        | 0        | 0        | 0        | 0 |
| 0        | 0        | 0        | 0        | 0        | 0        | 0        | 0        | 0 |
| 7674900  | 4366600  | 4878200  | 14500000 | 0        | 0        | 3739700  | 0        | 0 |
| 0        | 0        | 0        | 0        | 0        | 0        | 0        | 0        | 0 |
| 0        | 0        | 0        | 0        | 0        | 0        | 0        | 0        | 0 |
| 12100000 | 6062900  | 0        | 8438700  | 3343700  | 0        | 5484800  | 0        | 0 |
| 8207600  | 8487900  | 12300000 | 0        | 0        | 3155100  | 10400000 | 0        | 0 |
| 3017600  | 6146900  | 4765900  | 1.00E+07 | 2507900  | 0        | 6178700  | 0        | 0 |
| 0        | 0        | 0        | 0        | 0        | 0        | 0        | 0        | 0 |
| 2935600  | 0        | 0        | 0        | 0        | 0        | 0        | 0        | 0 |
| 9898000  | 0        | 0        | 0        | 0        | 7347400  | 12600000 | 0        | 0 |
| 1859700  | 353720   | 386020   | 0        | 549780   | 419330   | 771390   | 0        | 0 |
| 22600000 | 37800000 | 27300000 | 51500000 | 25900000 | 22500000 | 39100000 | 1.07E+08 | 0 |
| 0        | 0        | 0        | 0        | 0        | 0        | 0        | 0        | 0 |
| 0        | 0        | 0        | 0        | 0        | 0        | 0        | 0        | 0 |
| 0        | 0        | 2150200  | 0        | 1217500  | 730810   | 2424500  | 0        | 0 |
| 1369200  | 7830100  | 7524500  | 11300000 | 0        | 0        | 0        | 0        | 0 |
| 4044900  | 0        | 0        | 0        | 0        | 0        | 4455000  | 0        | 0 |
| 0        | 4624700  | 7254300  | 5849100  | 0        | 2608100  | 4263900  | 0        | 0 |
| 3270700  | 8096200  | 8903200  | 15200000 | 841220   | 4720300  | 12200000 | 0        | 0 |
| 1809200  | 342020   | 238980   | 609940   | 0        | 350120   | 911100   | 0        | 0 |
| 1806900  | 8238500  | 7935000  | 17500000 | 3228100  | 3780200  | 5976800  | 248680   | 0 |
| 0        | 0        | 0        | 0        | 0        | 0        | 0        | 0        | 0 |
| 1553100  | 15900000 | 9865200  | 5342600  | 2760400  | 3337300  | 1973400  | 0        | 0 |
| 2284800  | 2878300  | 5083300  | 4635200  | 1139600  | 2039100  | 3553500  | 0        | 0 |
| 0        | 0        | 0        | 0        | 0        | 0        | 0        | 0        | 0 |
| 0        | 0        | 3465000  | 1848400  | 630300   | 0        | 1329200  | 0        | 0 |
| 7358900  | 10500000 | 5812800  | 22900000 | 2677500  | 4570700  | 14200000 | 0        | 0 |
| 0        | 0        | 0        | 4028600  | 0        | 0        | 0        | 0        | 0 |
| 0        | 0        | 0        | 0        | 0        | 0        | 0        | 0        | 0 |
| 0        | 2690500  | 3067600  | 0        | 1037800  | 2933900  | 3121800  | 0        | 0 |

|          |          |          |          |          |          |          |          |
|----------|----------|----------|----------|----------|----------|----------|----------|
| 2232000  | 1.00E+07 | 9969700  | 8060300  | 1255300  | 2817900  | 11700000 | 0        |
| 0        | 0        | 0        | 0        | 0        | 0        | 0        | 0        |
| 3709700  | 0        | 0        | 0        | 0        | 0        | 0        | 0        |
| 631810   | 5118000  | 3281600  | 6154800  | 0        | 1826600  | 977350   | 0        |
| 2434200  | 0        | 0        | 0        | 0        | 1778500  | 3098600  | 0        |
| 6716900  | 1246700  | 0        | 10200000 | 1461200  | 0        | 1797400  | 0        |
| 5660900  | 6612900  | 6812300  | 13600000 | 0        | 0        | 4578800  | 0        |
| 0        | 0        | 0        | 556180   | 0        | 0        | 0        | 0        |
| 1423300  | 0        | 0        | 0        | 0        | 0        | 0        | 0        |
| 665570   | 1477300  | 0        | 2210200  | 2151200  | 878050   | 1638600  | 0        |
| 3555000  | 0        | 5212100  | 0        | 0        | 1776100  | 11100000 | 0        |
| 0        | 0        | 0        | 0        | 0        | 0        | 0        | 0        |
| 1260500  | 0        | 0        | 0        | 0        | 0        | 0        | 0        |
| 2530600  | 0        | 0        | 0        | 0        | 0        | 0        | 2364900  |
| 1033400  | 8779000  | 0        | 0        | 0        | 0        | 930760   | 0        |
| 0        | 0        | 792450   | 0        | 3502100  | 0        | 2133600  | 0        |
| 2624200  | 6534500  | 4796300  | 8016400  | 6966400  | 6457800  | 9889400  | 0        |
| 3973900  | 9333100  | 10700000 | 13800000 | 0        | 5198700  | 6903000  | 0        |
| 0        | 0        | 0        | 0        | 0        | 0        | 0        | 0        |
| 3061400  | 4949300  | 0        | 4718800  | 2568900  | 2642600  | 5348100  | 0        |
| 0        | 0        | 0        | 0        | 0        | 0        | 0        | 0        |
| 0        | 0        | 0        | 0        | 0        | 0        | 0        | 0        |
| 0        | 0        | 0        | 0        | 0        | 0        | 0        | 0        |
| 0        | 0        | 0        | 5626000  | 6233000  | 0        | 6092500  | 12500000 |
| 0        | 0        | 0        | 0        | 0        | 0        | 0        | 0        |
| 5392300  | 5328600  | 0        | 1.30E+07 | 1581900  | 0        | 6300000  | 0        |
| 4762800  | 0        | 4012700  | 0        | 0        | 0        | 2234600  | 0        |
| 620470   | 0        | 0        | 0        | 0        | 0        | 2169500  | 0        |
| 0        | 0        | 0        | 0        | 0        | 0        | 0        | 0        |
| 0        | 183710   | 759910   | 0        | 1658100  | 2173000  | 2920400  | 0        |
| 4219000  | 5528900  | 1536300  | 8015800  | 3878400  | 0        | 6725600  | 0        |
| 674470   | 6160300  | 876200   | 0        | 0        | 2820400  | 2528900  | 0        |
| 2278800  | 5798600  | 4359900  | 7425600  | 0        | 2237100  | 0        | 0        |
| 0        | 0        | 0        | 0        | 0        | 0        | 0        | 0        |
| 3827700  | 0        | 0        | 0        | 0        | 0        | 8329500  | 0        |
| 3942700  | 9203700  | 2241800  | 14100000 | 1880000  | 3332400  | 5654600  | 0        |
| 0        | 15600000 | 3877700  | 19700000 | 5157300  | 2906000  | 5403500  | 0        |
| 1195600  | 0        | 0        | 1008500  | 424050   | 512330   | 0        | 0        |
| 4137200  | 0        | 0        | 0        | 0        | 0        | 0        | 0        |
| 0        | 0        | 0        | 0        | 0        | 0        | 0        | 0        |
| 1097500  | 0        | 0        | 2900200  | 0        | 0        | 0        | 0        |
| 19200000 | 41100000 | 41700000 | 41700000 | 14400000 | 24900000 | 29800000 | 0        |
| 0        | 0        | 0        | 0        | 0        | 0        | 0        | 0        |
| 1742800  | 2912500  | 4782200  | 6618000  | 2320400  | 1901900  | 3105300  | 0        |
| 0        | 0        | 0        | 0        | 0        | 0        | 0        | 0        |
| 1196400  | 2188400  | 0        | 4061500  | 1169800  | 1658100  | 2324400  | 0        |
| 1060900  | 0        | 0        | 0        | 0        | 0        | 0        | 0        |



|          |          |          |          |          |          |          |         |
|----------|----------|----------|----------|----------|----------|----------|---------|
| 8006600  | 0        | 0        | 6421600  | 1308200  | 2784400  | 3559300  | 0       |
| 227540   | 0        | 0        | 0        | 0        | 0        | 0        | 0       |
| 0        | 1947100  | 552290   | 2052400  | 1192100  | 1573200  | 604650   | 0       |
| 0        | 5654200  | 3550500  | 0        | 0        | 0        | 5968300  | 0       |
| 0        | 0        | 0        | 0        | 0        | 0        | 0        | 0       |
| 0        | 0        | 0        | 0        | 0        | 0        | 0        | 0       |
| 7081100  | 4202400  | 6203600  | 4168700  | 2718900  | 0        | 2567900  | 0       |
| 981340   | 3500800  | 2148800  | 1760900  | 1802400  | 1499800  | 5056200  | 0       |
| 0        | 941270   | 0        | 0        | 897900   | 0        | 0        | 0       |
| 1288900  | 4279300  | 6448300  | 3088000  | 0        | 0        | 0        | 0       |
| 524220   | 549830   | 2784000  | 3894100  | 2064500  | 2584400  | 5975600  | 0       |
| 0        | 0        | 0        | 0        | 0        | 0        | 0        | 0       |
| 626000   | 3523600  | 0        | 2268600  | 858080   | 898590   | 2434800  | 0       |
| 2147900  | 0        | 0        | 0        | 0        | 0        | 0        | 1496500 |
| 0        | 0        | 0        | 0        | 0        | 0        | 0        | 0       |
| 3774000  | 3430700  | 0        | 4879800  | 0        | 0        | 0        | 0       |
| 1141900  | 0        | 0        | 0        | 0        | 0        | 0        | 0       |
| 561870   | 907410   | 948420   | 0        | 557100   | 550580   | 2129100  | 0       |
| 1645100  | 0        | 0        | 0        | 0        | 0        | 1536000  | 0       |
| 0        | 0        | 0        | 0        | 0        | 0        | 0        | 0       |
| 0        | 9778900  | 0        | 10400000 | 2581900  | 4984000  | 8080900  | 0       |
| 2059400  | 1201800  | 877200   | 4246400  | 2214400  | 3422300  | 4241600  | 0       |
| 1738200  | 3027600  | 0        | 8530200  | 0        | 0        | 0        | 0       |
| 16300000 | 32800000 | 37500000 | 40900000 | 10300000 | 14600000 | 2.40E+07 | 0       |
| 0        | 3443000  | 3279100  | 1813400  | 0        | 2075300  | 4382200  | 0       |
| 0        | 1942000  | 2753600  | 5935500  | 1695400  | 1497800  | 3237200  | 0       |
| 0        | 0        | 0        | 0        | 0        | 0        | 0        | 0       |
| 0        | 0        | 0        | 0        | 0        | 0        | 0        | 0       |
| 0        | 0        | 0        | 1338400  | 0        | 0        | 0        | 0       |
| 2492700  | 0        | 0        | 0        | 0        | 0        | 0        | 0       |
| 0        | 0        | 0        | 0        | 0        | 0        | 0        | 0       |
| 2995700  | 3944900  | 0        | 4517600  | 669760   | 1357900  | 4484300  | 0       |
| 0        | 1127100  | 0        | 0        | 271480   | 574530   | 909500   | 0       |
| 716390   | 647240   | 0        | 0        | 0        | 1172400  | 1285900  | 0       |
| 0        | 0        | 0        | 0        | 0        | 0        | 0        | 0       |
| 0        | 0        | 0        | 0        | 0        | 0        | 922930   | 0       |
| 0        | 0        | 0        | 0        | 0        | 0        | 0        | 0       |
| 0        | 0        | 0        | 0        | 0        | 0        | 0        | 0       |
| 0        | 0        | 0        | 0        | 0        | 0        | 0        | 0       |
| 0        | 946960   | 0        | 0        | 0        | 640100   | 1101600  | 0       |
| 0        | 0        | 751860   | 0        | 0        | 1417300  | 2795800  | 0       |
| 0        | 6343100  | 0        | 0        | 2637300  | 3285000  | 3789900  | 0       |
| 0        | 0        | 0        | 0        | 0        | 0        | 0        | 0       |
| 1790200  | 0        | 0        | 0        | 0        | 0        | 5124700  | 0       |
| 0        | 0        | 0        | 4233900  | 0        | 0        | 0        | 0       |
| 0        | 3290600  | 0        | 0        | 1785000  | 0        | 4638500  | 0       |
| 3260500  | 0        | 0        | 0        | 0        | 0        | 2796800  | 0       |

|          |          |          |          |          |          |          |          |   |
|----------|----------|----------|----------|----------|----------|----------|----------|---|
| 0        | 0        | 0        | 0        | 0        | 0        | 0        | 0        | 0 |
| 0        | 0        | 0        | 0        | 0        | 0        | 0        | 0        | 0 |
| 815050   | 4701500  | 8630800  | 10500000 | 0        | 3850000  | 5500300  | 0        | 0 |
| 2939200  | 0        | 0        | 0        | 0        | 0        | 0        | 0        | 0 |
| 0        | 0        | 0        | 5681600  | 522880   | 659360   | 0        | 0        | 0 |
| 3526000  | 0        | 0        | 0        | 1627400  | 2436500  | 3343200  | 0        | 0 |
| 0        | 0        | 0        | 0        | 0        | 0        | 0        | 0        | 0 |
| 11500000 | 9952600  | 6518100  | 14800000 | 0        | 0        | 0        | 0        | 0 |
| 0        | 0        | 0        | 0        | 0        | 0        | 0        | 0        | 0 |
| 0        | 0        | 0        | 0        | 0        | 0        | 0        | 0        | 0 |
| 0        | 0        | 0        | 0        | 0        | 0        | 0        | 0        | 0 |
| 0        | 0        | 0        | 0        | 0        | 0        | 0        | 0        | 0 |
| 0        | 0        | 0        | 0        | 0        | 0        | 0        | 0        | 0 |
| 0        | 0        | 0        | 0        | 0        | 0        | 0        | 0        | 0 |
| 0        | 0        | 0        | 0        | 0        | 0        | 0        | 0        | 0 |
| 0        | 0        | 0        | 0        | 0        | 0        | 0        | 0        | 0 |
| 0        | 0        | 0        | 0        | 0        | 0        | 0        | 0        | 0 |
| 0        | 0        | 0        | 0        | 0        | 0        | 0        | 0        | 0 |
| 969270   | 0        | 0        | 0        | 0        | 0        | 0        | 0        | 0 |
| 0        | 4646500  | 0        | 5160700  | 1465500  | 3704000  | 3614200  | 0        | 0 |
| 72500000 | 32700000 | 22200000 | 48100000 | 6.80E+07 | 81600000 | 1.60E+08 | 73500000 | 0 |
| 0        | 0        | 0        | 0        | 0        | 0        | 4064000  | 0        | 0 |
| 0        | 0        | 0        | 0        | 0        | 0        | 0        | 0        | 0 |
| 2428100  | 0        | 0        | 0        | 0        | 0        | 0        | 1264500  | 0 |
| 0        | 2963700  | 0        | 4074100  | 1091900  | 252750   | 2603300  | 0        | 0 |
| 0        | 0        | 0        | 0        | 0        | 0        | 1472100  | 0        | 0 |
| 0        | 0        | 0        | 0        | 0        | 0        | 0        | 0        | 0 |
| 835030   | 1970500  | 0        | 2864100  | 1934800  | 1241000  | 7399600  | 0        | 0 |
| 0        | 848900   | 4480400  | 5729900  | 0        | 322100   | 511310   | 0        | 0 |
| 0        | 0        | 0        | 0        | 0        | 0        | 0        | 0        | 0 |
| 6198300  | 0        | 0        | 0        | 0        | 0        | 0        | 0        | 0 |
| 0        | 0        | 0        | 0        | 0        | 0        | 0        | 0        | 0 |
| 4215700  | 9915100  | 5694900  | 671990   | 3590200  | 5006700  | 9343900  | 0        | 0 |
| 0        | 4950600  | 6954500  | 8352500  | 2573200  | 2695800  | 4852500  | 0        | 0 |
| 0        | 0        | 0        | 0        | 0        | 0        | 0        | 0        | 0 |
| 0        | 0        | 0        | 0        | 0        | 0        | 0        | 0        | 0 |
| 0        | 0        | 0        | 0        | 0        | 0        | 0        | 0        | 0 |
| 0        | 6513900  | 7121600  | 8801000  | 273660   | 3460200  | 567710   | 0        | 0 |
| 0        | 0        | 0        | 0        | 0        | 0        | 0        | 0        | 0 |
| 0        | 2064900  | 1586500  | 2623000  | 1504600  | 0        | 600740   | 0        | 0 |
| 0        | 0        | 0        | 0        | 0        | 0        | 0        | 0        | 0 |
| 919060   | 0        | 0        | 0        | 0        | 0        | 0        | 0        | 0 |
| 3570100  | 0        | 0        | 8797300  | 4183700  | 5205100  | 9392900  | 0        | 0 |
| 1843100  | 2492400  | 4865700  | 5246900  | 2221600  | 1617600  | 4566500  | 0        | 0 |
| 3451200  | 3041900  | 0        | 0        | 0        | 0        | 2859600  | 0        | 0 |
| 0        | 0        | 0        | 0        | 0        | 0        | 0        | 0        | 0 |
| 0        | 0        | 0        | 0        | 0        | 0        | 0        | 0        | 0 |
| 2311100  | 0        | 743730   | 0        | 0        | 2225800  | 2521600  | 0        | 0 |

|          |          |          |          |          |          |          |          |         |
|----------|----------|----------|----------|----------|----------|----------|----------|---------|
| 0        | 0        | 0        | 0        | 0        | 0        | 0        | 0        | 0       |
| 0        | 0        | 0        | 0        | 0        | 0        | 0        | 0        | 0       |
| 29300000 | 4.50E+07 | 0        | 0        | 0        | 0        | 51700000 | 0        | 0       |
| 4486900  | 0        | 0        | 0        | 247760   | 0        | 2621800  | 0        | 0       |
| 0        | 0        | 0        | 0        | 0        | 0        | 0        | 0        | 0       |
| 0        | 0        | 0        | 0        | 0        | 0        | 0        | 0        | 0       |
| 0        | 0        | 0        | 0        | 0        | 0        | 0        | 0        | 0       |
| 0        | 0        | 0        | 0        | 0        | 0        | 0        | 0        | 0       |
| 2.30E+07 | 41800000 | 28700000 | 11300000 | 8547200  | 18300000 | 10400000 | 0        | 0       |
| 0        | 0        | 0        | 0        | 779630   | 1670600  | 1438400  | 0        | 0       |
| 0        | 0        | 0        | 0        | 0        | 0        | 0        | 0        | 0       |
| 0        | 0        | 0        | 0        | 0        | 0        | 0        | 0        | 1364600 |
| 0        | 0        | 0        | 0        | 0        | 0        | 0        | 0        | 0       |
| 0        | 0        | 0        | 0        | 0        | 37600000 | 293240   | 0        | 0       |
| 0        | 0        | 0        | 0        | 0        | 0        | 0        | 0        | 0       |
| 0        | 0        | 0        | 0        | 0        | 0        | 0        | 0        | 0       |
| 0        | 0        | 0        | 0        | 0        | 0        | 0        | 0        | 0       |
| 0        | 0        | 0        | 0        | 0        | 0        | 0        | 0        | 0       |
| 44200000 | 99900000 | 8.20E+07 | 1.34E+08 | 50300000 | 63100000 | 1.04E+08 | 8683300  | 0       |
| 0        | 0        | 0        | 0        | 0        | 0        | 0        | 0        | 0       |
| 0        | 0        | 0        | 0        | 0        | 0        | 0        | 0        | 0       |
| 5870600  | 48100000 | 36700000 | 46500000 | 3803700  | 4896600  | 21600000 | 0        | 0       |
| 0        | 0        | 0        | 0        | 0        | 0        | 0        | 0        | 0       |
| 0        | 0        | 0        | 0        | 0        | 0        | 0        | 0        | 0       |
| NA       | 1.60E+09 | 1.41E+09 | 1.87E+09 | NA       | NA       | NA       | 4.42E+08 | 0       |
| NA       | 94800000 | 1.13E+09 | 1.84E+08 | NA       | NA       | NA       | 1.26E+09 | 0       |
| NA       | 1.46E+10 | 1.20E+10 | 2.35E+10 | NA       | NA       | NA       | 4.17E+09 | 0       |
| NA       | 4.32E+08 | 1.01E+09 | 7.90E+08 | NA       | NA       | NA       | 5.59E+08 | 0       |
| NA       | 4.31E+08 | 4.85E+08 | 7.73E+08 | NA       | NA       | NA       | 46800000 | 0       |
| NA       | 1.92E+09 | 2.00E+09 | 2.84E+09 | NA       | NA       | NA       | 4.26E+08 | 0       |
| NA       | 4.35E+08 | 4.97E+08 | 6.10E+08 | NA       | NA       | NA       | 72100000 | 0       |
| NA       | 1.05E+09 | 1.13E+09 | 1.27E+09 | NA       | NA       | NA       | 2.74E+09 | 0       |
| NA       | 1.61E+08 | 1.48E+08 | 1.95E+08 | NA       | NA       | NA       | 0        | 0       |
| NA       | 3.83E+08 | 4.58E+08 | 5.73E+08 | NA       | NA       | NA       | 69700000 | 0       |
| NA       | 0        | 2.60E+07 | 31100000 | NA       | NA       | NA       | 2032100  | 0       |
| NA       | 2.45E+08 | 2.16E+08 | 3.45E+08 | NA       | NA       | NA       | 3811500  | 0       |
| NA       | 1.62E+08 | 1.60E+08 | 1.54E+08 | NA       | NA       | NA       | 1.37E+08 | 0       |
| NA       | 4.37E+08 | 4.31E+08 | 5.69E+08 | NA       | NA       | NA       | 1.13E+08 | 0       |
| NA       | 1.34E+08 | 1.28E+08 | 1.67E+08 | NA       | NA       | NA       | 25400000 | 0       |
| NA       | 1.74E+08 | 1.44E+08 | 1.43E+08 | NA       | NA       | NA       | 24200000 | 0       |
| NA       | 3.96E+08 | 4.41E+08 | 5.22E+08 | NA       | NA       | NA       | 48300000 | 0       |
| NA       | 37500000 | 43400000 | 3.30E+07 | NA       | NA       | NA       | 31800000 | 0       |
| NA       | 57200000 | 96700000 | 1.29E+08 | NA       | NA       | NA       | 50500000 | 0       |
| NA       | 1.17E+08 | 85700000 | 1.36E+08 | NA       | NA       | NA       | 14100000 | 0       |
| NA       | 1.00E+08 | 68900000 | 95800000 | NA       | NA       | NA       | 0        | 0       |
| NA       | 1.97E+08 | 1.83E+08 | 2.43E+08 | NA       | NA       | NA       | 52300000 | 0       |
| NA       | 1.20E+07 | 4243800  | 19600000 | NA       | NA       | NA       | 7512600  | 0       |

|    |          |          |          |    |    |    |          |
|----|----------|----------|----------|----|----|----|----------|
| NA | 52100000 | 2.20E+07 | 64700000 | NA | NA | NA | 0        |
| NA | 1.27E+08 | 83600000 | 1.28E+08 | NA | NA | NA | 2876200  |
| NA | 92400000 | 1.44E+08 | 2.36E+08 | NA | NA | NA | 36500000 |
| NA | 59600000 | 30100000 | 1.40E+08 | NA | NA | NA | 5010100  |
| NA | 0        | 0        | 0        | NA | NA | NA | 0        |
| NA | 33600000 | 31500000 | 38100000 | NA | NA | NA | 745420   |
| NA | 3240200  | 3905300  | 7236600  | NA | NA | NA | 0        |
| NA | 59300000 | 5.10E+07 | 68100000 | NA | NA | NA | 3837400  |
| NA | 26800000 | 17800000 | 38800000 | NA | NA | NA | 66400000 |
| NA | 0        | 0        | 17100000 | NA | NA | NA | 0        |
| NA | 66200000 | 22100000 | 0        | NA | NA | NA | 4032100  |
| NA | 11400000 | 26500000 | 29300000 | NA | NA | NA | 0        |
| NA | 28800000 | 16400000 | 10600000 | NA | NA | NA | 0        |
| NA | 27500000 | 4.40E+07 | 38700000 | NA | NA | NA | 0        |
| NA | 0        | 0        | 0        | NA | NA | NA | 21100000 |
| NA | 9.30E+07 | 1.02E+08 | 1.60E+08 | NA | NA | NA | 27200000 |
| NA | 17500000 | 30900000 | 35200000 | NA | NA | NA | 0        |
| NA | 72700000 | 53300000 | 77100000 | NA | NA | NA | 10800000 |
| NA | 0        | 0        | 0        | NA | NA | NA | 0        |
| NA | 0        | 0        | 0        | NA | NA | NA | 0        |
| NA | 26700000 | 17200000 | 47100000 | NA | NA | NA | 0        |
| NA | 49300000 | 6600900  | 68200000 | NA | NA | NA | 0        |
| NA | 27700000 | 37300000 | 50500000 | NA | NA | NA | 0        |
| NA | 0        | 1475500  | 0        | NA | NA | NA | 0        |
| NA | 98700000 | 1.77E+08 | 1.86E+08 | NA | NA | NA | 1.80E+08 |
| NA | 68700000 | 66300000 | 1.05E+08 | NA | NA | NA | 0        |
| NA | 0        | 2273700  | 3474800  | NA | NA | NA | 0        |
| NA | 0        | 2196400  | 0        | NA | NA | NA | 0        |
| NA | 18500000 | 15200000 | 26600000 | NA | NA | NA | 684570   |
| NA | 32900000 | 26200000 | 24500000 | NA | NA | NA | 0        |
| NA | 11500000 | 6301400  | 11800000 | NA | NA | NA | 2131400  |
| NA | 50900000 | 5.40E+07 | 72100000 | NA | NA | NA | 0        |
| NA | 0        | 427740   | 15400000 | NA | NA | NA | 0        |
| NA | 0        | 0        | 0        | NA | NA | NA | 0        |
| NA | 0        | 1083100  | 0        | NA | NA | NA | 0        |
| NA | 68700000 | 60700000 | 59300000 | NA | NA | NA | 0        |
| NA | 555180   | 0        | 0        | NA | NA | NA | 0        |
| NA | 0        | 5445400  | 0        | NA | NA | NA | 0        |
| NA | 0        | 0        | 0        | NA | NA | NA | 1.37E+09 |
| NA | 12700000 | 10700000 | 15900000 | NA | NA | NA | 0        |
| NA | 0        | 0        | 0        | NA | NA | NA | 0        |
| NA | 0        | 0        | 0        | NA | NA | NA | 0        |
| NA | 4262600  | 2704000  | 2012800  | NA | NA | NA | 301000   |
| NA | 1.18E+08 | 5.79E+08 | 2.01E+08 | NA | NA | NA | 4.46E+08 |
| NA | 0        | 0        | 0        | NA | NA | NA | 0        |
| NA | 9286800  | 30200000 | 16700000 | NA | NA | NA | 21400000 |
| NA | 0        | 0        | 0        | NA | NA | NA | 8011200  |



|    |          |          |          |    |    |    |          |
|----|----------|----------|----------|----|----|----|----------|
| NA | 0        | 0        | 0        | NA | NA | NA | 0        |
| NA | 0        | 0        | 0        | NA | NA | NA | 0        |
| NA | 6534700  | 7447200  | 16100000 | NA | NA | NA | 0        |
| NA | 3264800  | 9371300  | 21300000 | NA | NA | NA | 0        |
| NA | 14100000 | 1.80E+07 | 22700000 | NA | NA | NA | 6526300  |
| NA | 0        | 36600000 | 36300000 | NA | NA | NA | 0        |
| NA | 0        | 0        | 0        | NA | NA | NA | 0        |
| NA | 8753000  | 8987500  | 25700000 | NA | NA | NA | 1410900  |
| NA | 0        | 0        | 10400000 | NA | NA | NA | 0        |
| NA | 14800000 | 23500000 | 27300000 | NA | NA | NA | 0        |
| NA | 10700000 | 0        | 10600000 | NA | NA | NA | 0        |
| NA | 23400000 | 23800000 | 26300000 | NA | NA | NA | 7392800  |
| NA | 0        | 0        | 0        | NA | NA | NA | 674850   |
| NA | 4426800  | 4424400  | 1060900  | NA | NA | NA | 0        |
| NA | 17600000 | 21300000 | 25500000 | NA | NA | NA | 0        |
| NA | 0        | 0        | 0        | NA | NA | NA | 0        |
| NA | 12400000 | 7130400  | 1.20E+07 | NA | NA | NA | 0        |
| NA | 0        | 0        | 0        | NA | NA | NA | 0        |
| NA | 2841700  | 4036500  | 11100000 | NA | NA | NA | 0        |
| NA | 2772900  | 2291000  | 1.60E+07 | NA | NA | NA | 0        |
| NA | 6037200  | 16800000 | 5707800  | NA | NA | NA | 0        |
| NA | 0        | 0        | 0        | NA | NA | NA | 0        |
| NA | 0        | 0        | 0        | NA | NA | NA | 1.29E+08 |
| NA | 0        | 0        | 0        | NA | NA | NA | 0        |
| NA | 0        | 0        | 0        | NA | NA | NA | 0        |
| NA | 0        | 0        | 4982700  | NA | NA | NA | 0        |
| NA | 0        | 0        | 1410100  | NA | NA | NA | 0        |
| NA | 16500000 | 4995200  | 27700000 | NA | NA | NA | 0        |
| NA | 0        | 0        | 1.38E+08 | NA | NA | NA | 4.46E+08 |
| NA | 0        | 0        | 0        | NA | NA | NA | 0        |
| NA | 2432700  | 3933900  | 5241700  | NA | NA | NA | 0        |
| NA | 0        | 10500000 | 6167300  | NA | NA | NA | 0        |
| NA | 0        | 0        | 0        | NA | NA | NA | 0        |
| NA | 0        | 0        | 0        | NA | NA | NA | 0        |
| NA | 471200   | 378490   | 920900   | NA | NA | NA | 0        |
| NA | 9237200  | 13600000 | 23600000 | NA | NA | NA | 0        |
| NA | 0        | 5566500  | 0        | NA | NA | NA | 0        |
| NA | 0        | 848500   | 1264100  | NA | NA | NA | 0        |
| NA | 6986800  | 4672100  | 4038100  | NA | NA | NA | 1545200  |
| NA | 4982200  | 915270   | 9140900  | NA | NA | NA | 0        |
| NA | 0        | 0        | 157520   | NA | NA | NA | 3591400  |
| NA | 0        | 0        | 0        | NA | NA | NA | 0        |
| NA | 0        | 0        | 0        | NA | NA | NA | 0        |
| NA | 4156300  | 0        | 5008400  | NA | NA | NA | 0        |
| NA | 23800000 | 19600000 | 10300000 | NA | NA | NA | 0        |
| NA | 378170   | 596120   | 628240   | NA | NA | NA | 0        |
| NA | 1287500  | 0        | 821460   | NA | NA | NA | 0        |

|    |          |          |          |    |    |          |
|----|----------|----------|----------|----|----|----------|
| NA | 93100000 | 0        | 1.25E+08 | NA | NA | 0        |
| NA | 9836700  | 9173100  | 22400000 | NA | NA | 1618000  |
| NA | 10900000 | 12400000 | 19500000 | NA | NA | 6029900  |
| NA | 0        | 0        | 0        | NA | NA | 864030   |
| NA | 6564700  | 7180200  | 10700000 | NA | NA | 0        |
| NA | 0        | 10300000 | 12500000 | NA | NA | 0        |
| NA | 0        | 0        | 3963100  | NA | NA | 8613700  |
| NA | 0        | 0        | 0        | NA | NA | 0        |
| NA | 14900000 | 13100000 | 6313700  | NA | NA | 0        |
| NA | 0        | 0        | 0        | NA | NA | 5603900  |
| NA | 0        | 0        | 0        | NA | NA | 0        |
| NA | 22800000 | 22100000 | 27400000 | NA | NA | 41400000 |
| NA | 2257100  | 2167400  | 3644600  | NA | NA | 0        |
| NA | 9065700  | 3454100  | 5554300  | NA | NA | 0        |
| NA | 5836500  | 52700000 | 6618700  | NA | NA | 0        |
| NA | 9344100  | 11700000 | 13700000 | NA | NA | 1406700  |
| NA | 7547800  | 6170700  | 12500000 | NA | NA | 0        |
| NA | 0        | 0        | 685710   | NA | NA | 0        |
| NA | 1685300  | 9131800  | 2604800  | NA | NA | 0        |
| NA | 0        | 0        | 0        | NA | NA | 0        |
| NA | 0        | 0        | 0        | NA | NA | 0        |
| NA | 4983500  | 1182800  | 6345500  | NA | NA | 0        |
| NA | 5605500  | 1203500  | 7578400  | NA | NA | 241450   |
| NA | 4.50E+08 | 4.50E+08 | 5.24E+08 | NA | NA | 0        |
| NA | 0        | 0        | 0        | NA | NA | 0        |
| NA | 0        | 0        | 4473700  | NA | NA | 0        |
| NA | 0        | 0        | 0        | NA | NA | 0        |
| NA | 4279300  | 4206100  | 0        | NA | NA | 0        |
| NA | 0        | 8600100  | 0        | NA | NA | 0        |
| NA | 0        | 0        | 0        | NA | NA | 0        |
| NA | 0        | 0        | 0        | NA | NA | 0        |
| NA | 0        | 0        | 0        | NA | NA | 0        |
| NA | 0        | 7032200  | 7116500  | NA | NA | 0        |
| NA | 0        | 0        | 0        | NA | NA | 4294300  |
| NA | 0        | 0        | 0        | NA | NA | 475860   |
| NA | 0        | 0        | 0        | NA | NA | 0        |
| NA | 4137400  | 0        | 6816700  | NA | NA | 0        |
| NA | 0        | 3177300  | 0        | NA | NA | 5245000  |
| NA | 1728400  | 0        | 3021900  | NA | NA | 0        |
| NA | 0        | 0        | 0        | NA | NA | 0        |
| NA | 0        | 0        | 5224400  | NA | NA | 0        |
| NA | 626960   | 663620   | 752280   | NA | NA | 503770   |
| NA | 2630200  | 0        | 0        | NA | NA | 0        |
| NA | 0        | 0        | 0        | NA | NA | 0        |
| NA | 4273100  | 4083300  | 4798800  | NA | NA | 0        |
| NA | 0        | 0        | 0        | NA | NA | 0        |
| NA | 7754900  | 8581500  | 146950   | NA | NA | 336770   |

|    |         |          |          |    |    |    |          |
|----|---------|----------|----------|----|----|----|----------|
| NA | 392480  | 0        | 0        | NA | NA | NA | 0        |
| NA | 4548900 | 2138100  | 10600000 | NA | NA | NA | 0        |
| NA | 0       | 2104700  | 0        | NA | NA | NA | 0        |
| NA | 5552000 | 11400000 | 15200000 | NA | NA | NA | 2734400  |
| NA | 0       | 0        | 0        | NA | NA | NA | 0        |
| NA | 6279200 | 4478200  | 6257700  | NA | NA | NA | 0        |
| NA | 7852900 | 5480100  | 9174000  | NA | NA | NA | 0        |
| NA | 694900  | 3567700  | 3975200  | NA | NA | NA | 143460   |
| NA | 0       | 0        | 0        | NA | NA | NA | 0        |
| NA | 0       | 0        | 0        | NA | NA | NA | 0        |
| NA | 0       | 0        | 0        | NA | NA | NA | 0        |
| NA | 2618300 | 783090   | 12200000 | NA | NA | NA | 0        |
| NA | 6857800 | 0        | 8186400  | NA | NA | NA | 0        |
| NA | 0       | 0        | 0        | NA | NA | NA | 0        |
| NA | 0       | 0        | 0        | NA | NA | NA | 0        |
| NA | 0       | 0        | 0        | NA | NA | NA | 0        |
| NA | 0       | 0        | 0        | NA | NA | NA | 0        |
| NA | 3068000 | 6984000  | 8890100  | NA | NA | NA | 0        |
| NA | 4686800 | 5057700  | 9905000  | NA | NA | NA | 0        |
| NA | 1862700 | 7104600  | 2729300  | NA | NA | NA | 0        |
| NA | 708340  | 0        | 1314300  | NA | NA | NA | 0        |
| NA | 0       | 0        | 0        | NA | NA | NA | 19100000 |
| NA | 0       | 9599400  | 0        | NA | NA | NA | 0        |
| NA | 0       | 0        | 0        | NA | NA | NA | 0        |
| NA | 0       | 0        | 0        | NA | NA | NA | 0        |
| NA | 0       | 12900000 | 8483300  | NA | NA | NA | 0        |
| NA | 0       | 0        | 0        | NA | NA | NA | 0        |
| NA | 5673300 | 0        | 1821100  | NA | NA | NA | 0        |
| NA | 0       | 0        | 0        | NA | NA | NA | 0        |
| NA | 3286600 | 0        | 5298000  | NA | NA | NA | 0        |
| NA | 471840  | 0        | 2902500  | NA | NA | NA | 0        |
| NA | 0       | 0        | 0        | NA | NA | NA | 0        |
| NA | 1732200 | 2026700  | 1811700  | NA | NA | NA | 0        |
| NA | 0       | 0        | 0        | NA | NA | NA | 0        |
| NA | 0       | 0        | 0        | NA | NA | NA | 0        |
| NA | 0       | 0        | 0        | NA | NA | NA | 0        |
| NA | 0       | 0        | 0        | NA | NA | NA | 6640900  |
| NA | 0       | 0        | 0        | NA | NA | NA | 0        |
| NA | 0       | 0        | 0        | NA | NA | NA | 6751800  |
| NA | 0       | 0        | 0        | NA | NA | NA | 0        |
| NA | 3713700 | 3679400  | 6057700  | NA | NA | NA | 0        |
| NA | 1290700 | 1103700  | 1437700  | NA | NA | NA | 0        |
| NA | 3886700 | 4692200  | 0        | NA | NA | NA | 0        |
| NA | 0       | 0        | 0        | NA | NA | NA | 0        |
| NA | 0       | 0        | 0        | NA | NA | NA | 1405700  |
| NA | 8763300 | 371230   | 596210   | NA | NA | NA | 0        |
| NA | 5327100 | 4913700  | 10700000 | NA | NA | NA | 0        |

|    |          |         |          |    |    |          |
|----|----------|---------|----------|----|----|----------|
| NA | 0        | 6426400 | 0        | NA | NA | 0        |
| NA | 0        | 0       | 4670300  | NA | NA | 0        |
| NA | 3502400  | 3739400 | 5077200  | NA | NA | 0        |
| NA | 0        | 0       | 0        | NA | NA | 0        |
| NA | 700180   | 728860  | 1371200  | NA | NA | 0        |
| NA | 7545500  | 6391900 | 0        | NA | NA | 0        |
| NA | 0        | 0       | 0        | NA | NA | 0        |
| NA | 0        | 0       | 0        | NA | NA | 0        |
| NA | 4931100  | 5177900 | 3919800  | NA | NA | 0        |
| NA | 0        | 4369600 | 1.10E+07 | NA | NA | 0        |
| NA | 0        | 0       | 0        | NA | NA | 0        |
| NA | 0        | 0       | 0        | NA | NA | 0        |
| NA | 0        | 0       | 0        | NA | NA | 0        |
| NA | 11500000 | 0       | 1.60E+07 | NA | NA | 0        |
| NA | 0        | 0       | 4466400  | NA | NA | 0        |
| NA | 0        | 0       | 0        | NA | NA | 0        |
| NA | 0        | 403970  | 1059900  | NA | NA | 0        |
| NA | 0        | 0       | 0        | NA | NA | 0        |
| NA | 0        | 0       | 0        | NA | NA | 0        |
| NA | 0        | 0       | 0        | NA | NA | 0        |
| NA | 0        | 0       | 0        | NA | NA | 0        |
| NA | 468150   | 0       | 1205200  | NA | NA | 0        |
| NA | 2027300  | 0       | 3006000  | NA | NA | 27800000 |
| NA | 5291300  | 0       | 0        | NA | NA | 0        |
| NA | 0        | 0       | 0        | NA | NA | 0        |
| NA | 0        | 0       | 0        | NA | NA | 0        |
| NA | 0        | 0       | 0        | NA | NA | 0        |
| NA | 1098500  | 1539400 | 1952600  | NA | NA | 0        |
| NA | 0        | 0       | 0        | NA | NA | 0        |
| NA | 0        | 0       | 0        | NA | NA | 0        |
| NA | 0        | 0       | 0        | NA | NA | 38600000 |
| NA | 1715000  | 4283700 | 9188700  | NA | NA | 0        |
| NA | 0        | 0       | 0        | NA | NA | 0        |
| NA | 0        | 0       | 0        | NA | NA | 0        |
| NA | 682680   | 1667500 | 0        | NA | NA | 0        |
| NA | 0        | 3094600 | 0        | NA | NA | 0        |
| NA | 0        | 0       | 0        | NA | NA | 0        |
| NA | 2469900  | 0       | 0        | NA | NA | 0        |
| NA | 0        | 0       | 0        | NA | NA | 0        |
| NA | 0        | 0       | 0        | NA | NA | 0        |
| NA | 924280   | 1174900 | 1993200  | NA | NA | 0        |
| NA | 0        | 0       | 0        | NA | NA | 0        |
| NA | 0        | 0       | 0        | NA | NA | 0        |
| NA | 0        | 0       | 0        | NA | NA | 0        |
| NA | 430380   | 331370  | 641740   | NA | NA | 0        |
| NA | 1022700  | 0       | 1632000  | NA | NA | 0        |
| NA | 0        | 3821900 | 0        | NA | NA | 0        |



|          |          |          |          |          |          |          |    |
|----------|----------|----------|----------|----------|----------|----------|----|
| NA       | 0        | 0        | 0        | NA       | NA       | NA       | 0  |
| NA       | 0        | 0        | 0        | NA       | NA       | NA       | 0  |
| NA       | 0        | 0        | 0        | NA       | NA       | NA       | 0  |
| NA       | 0        | 13100000 | 0        | NA       | NA       | NA       | 0  |
| NA       | 0        | 0        | 0        | NA       | NA       | NA       | 0  |
| NA       | 0        | 0        | 0        | NA       | NA       | NA       | 0  |
| NA       | 0        | 0        | 0        | NA       | NA       | NA       | 0  |
| NA       | 0        | 0        | 2580100  | NA       | NA       | NA       | 0  |
| NA       | 0        | 0        | 0        | NA       | NA       | NA       | 0  |
| NA       | 0        | 0        | 0        | NA       | NA       | NA       | 0  |
| NA       | 0        | 0        | 0        | NA       | NA       | NA       | 0  |
| NA       | 23700000 | 34800000 | 41800000 | NA       | NA       | NA       | 0  |
| NA       | 3210500  | 0        | 6597600  | NA       | NA       | NA       | 0  |
| NA       | 0        | 0        | 0        | NA       | NA       | NA       | 0  |
| NA       | 0        | 9599400  | 0        | NA       | NA       | NA       | 0  |
| NA       | 1592100  | 2051500  | 2346900  | NA       | NA       | NA       | 0  |
| NA       | 0        | 0        | 0        | NA       | NA       | NA       | 0  |
| NA       | 0        | 0        | 0        | NA       | NA       | NA       | 0  |
| NA       | 0        | 0        | 0        | NA       | NA       | NA       | 0  |
| NA       | 467970   | 354400   | 0        | NA       | NA       | NA       | 0  |
| NA       | 0        | 0        | 0        | NA       | NA       | NA       | 0  |
| NA       | 2432700  | 3111500  | 4251300  | NA       | NA       | NA       | 0  |
| NA       | 0        | 0        | 0        | NA       | NA       | NA       | 0  |
| NA       | 0        | 0        | 0        | NA       | NA       | NA       | 0  |
| NA       | 0        | 0        | 0        | NA       | NA       | NA       | 0  |
| NA       | 0        | 0        | 0        | NA       | NA       | NA       | 0  |
| NA       | 0        | 0        | 0        | NA       | NA       | NA       | 0  |
| NA       | 0        | 0        | 0        | NA       | NA       | NA       | 0  |
| NA       | 0        | 0        | 0        | NA       | NA       | NA       | 0  |
| NA       | 0        | 0        | 0        | NA       | NA       | NA       | 0  |
| NA       | 0        | 0        | 0        | NA       | NA       | NA       | 0  |
| NA       | 0        | 0        | 0        | NA       | NA       | NA       | 0  |
| NA       | 0        | 0        | 0        | NA       | NA       | NA       | 0  |
| NA       | 0        | 0        | 0        | NA       | NA       | NA       | 0  |
| NA       | 0        | 0        | 0        | NA       | NA       | NA       | 0  |
| NA       | 0        | 0        | 0        | NA       | NA       | NA       | 0  |
| NA       | 0        | 0        | 0        | NA       | NA       | NA       | 0  |
| NA       | 0        | 0        | 0        | NA       | NA       | NA       | 0  |
| NA       | 0        | 0        | 0        | NA       | NA       | NA       | 0  |
| NA       | 0        | 0        | 0        | NA       | NA       | NA       | 0  |
| NA       | 0        | 0        | 0        | NA       | NA       | NA       | 0  |
| NA       | 0        | 0        | 0        | NA       | NA       | NA       | 0  |
| NA       | 0        | 0        | 0        | NA       | NA       | NA       | 0  |
| NA       | 0        | 0        | 0        | NA       | NA       | NA       | 0  |
| NA       | 8835600  | 0        | 0        | NA       | NA       | NA       | 0  |
| 9.84E+08 | NA       | NA       | NA       | 6.26E+08 | 7.73E+08 | 1.43E+09 | NA |
| 9.73E+09 | NA       | NA       | NA       | 6.36E+09 | 8.21E+09 | 1.46E+10 | NA |
| 9.13E+08 | NA       | NA       | NA       | 7.34E+08 | 1.06E+09 | 1.85E+09 | NA |
| 2.23E+08 | NA       | NA       | NA       | 1.42E+08 | 4.87E+08 | 3.84E+08 | NA |
| 1.27E+08 | NA       | NA       | NA       | 1.67E+08 | 2.34E+08 | 3.82E+08 | NA |
| 2.95E+08 | NA       | NA       | NA       | 1.99E+08 | 2.55E+08 | 4.99E+08 | NA |
| 1.80E+08 | NA       | NA       | NA       | 1.63E+08 | 2.41E+08 | 3.78E+08 | NA |

|             |    |    |          |          |             |
|-------------|----|----|----------|----------|-------------|
| 3.92E+08 NA | NA | NA | 4.93E+08 | 3.25E+08 | 4.10E+08 NA |
| 0 NA        | NA | NA | 3724800  | 0        | 1.20E+07 NA |
| 1.04E+08 NA | NA | NA | 55700000 | 47700000 | 1.10E+08 NA |
| 9.10E+07 NA | NA | NA | 8.70E+07 | 1.09E+08 | 2.26E+08 NA |
| 8.10E+07 NA | NA | NA | 7.20E+07 | 1.00E+08 | 1.45E+08 NA |
| 47500000 NA | NA | NA | 75400000 | 83800000 | 1.23E+08 NA |
| 2.09E+08 NA | NA | NA | 1.62E+08 | 2.67E+08 | 4.14E+08 NA |
| 66100000 NA | NA | NA | 61700000 | 89200000 | 1.42E+08 NA |
| 1.42E+08 NA | NA | NA | 19600000 | 46200000 | 90800000 NA |
| 1.01E+08 NA | NA | NA | 6.10E+07 | 78900000 | 1.35E+08 NA |
| 1.52E+08 NA | NA | NA | 1.39E+08 | 2.30E+08 | 3.22E+08 NA |
| 74600000 NA | NA | NA | 7456400  | 18900000 | 29700000 NA |
| 53800000 NA | NA | NA | 35700000 | 32100000 | 71400000 NA |
| 2.60E+08 NA | NA | NA | 1.68E+08 | 2.81E+08 | 4.74E+08 NA |
| 31600000 NA | NA | NA | 17700000 | 18100000 | 61400000 NA |
| 90200000 NA | NA | NA | 9449400  | 10700000 | 37200000 NA |
| 27600000 NA | NA | NA | 634840   | 906260   | 3646800 NA  |
| 1.04E+08 NA | NA | NA | 25400000 | 73100000 | 1.53E+08 NA |
| 3043000 NA  | NA | NA | 7010000  | 4653000  | 14200000 NA |
| 89500000 NA | NA | NA | 9761300  | 24100000 | 79100000 NA |
| 74300000 NA | NA | NA | 32400000 | 54900000 | 90200000 NA |
| 3253200 NA  | NA | NA | 0        | 997120   | 3920300 NA  |
| 6188200 NA  | NA | NA | 4296600  | 1.10E+07 | 9149800 NA  |
| 12300000 NA | NA | NA | 10100000 | 13100000 | 27900000 NA |
| 26900000 NA | NA | NA | 5355500  | 14900000 | 2.80E+07 NA |
| 10300000 NA | NA | NA | 14700000 | 14100000 | 29200000 NA |
| 0 NA        | NA | NA | 0        | 0        | 0 NA        |
| 0 NA        | NA | NA | 2085000  | 2904900  | 11100000 NA |
| 27200000 NA | NA | NA | 27800000 | 45800000 | 60800000 NA |
| 12700000 NA | NA | NA | 8959100  | 11100000 | 10700000 NA |
| 43500000 NA | NA | NA | 3.60E+07 | 47800000 | 1.04E+08 NA |
| 698560 NA   | NA | NA | 4704800  | 18200000 | 24900000 NA |
| 12200000 NA | NA | NA | 0        | 865850   | 2214500 NA  |
| 18800000 NA | NA | NA | 2.30E+07 | 24600000 | 3.10E+07 NA |
| 2.90E+07 NA | NA | NA | 26100000 | 33100000 | 42600000 NA |
| 30800000 NA | NA | NA | 8312000  | 1.70E+07 | 31400000 NA |
| 2719200 NA  | NA | NA | 8598100  | 6364200  | 12200000 NA |
| 6731700 NA  | NA | NA | 0        | 0        | 0 NA        |
| 19800000 NA | NA | NA | 1726000  | 6044600  | 9541100 NA  |
| 9615000 NA  | NA | NA | 0        | 0        | 0 NA        |
| 11600000 NA | NA | NA | 6161900  | 10600000 | 9407300 NA  |
| 0 NA        | NA | NA | 0        | 563160   | 386870 NA   |
| 32200000 NA | NA | NA | 8198500  | 13200000 | 26600000 NA |
| 19600000 NA | NA | NA | 21800000 | 29300000 | 47600000 NA |
| 8367000 NA  | NA | NA | 0        | 0        | 0 NA        |
| 6008400 NA  | NA | NA | 2450200  | 0        | 3639800 NA  |
| 4743500 NA  | NA | NA | 12100000 | 5168600  | 24100000 NA |

|             |    |    |          |          |             |
|-------------|----|----|----------|----------|-------------|
| 9756400 NA  | NA | NA | 10100000 | 12200000 | 14900000 NA |
| 0 NA        | NA | NA | 0        | 0        | 0 NA        |
| 0 NA        | NA | NA | 0        | 0        | 0 NA        |
| 8341100 NA  | NA | NA | 3914600  | 10900000 | 16300000 NA |
| 0 NA        | NA | NA | 0        | 0        | 0 NA        |
| 0 NA        | NA | NA | 0        | 0        | 0 NA        |
| 3.00E+07 NA | NA | NA | 579940   | 1036700  | 1317800 NA  |
| 5476300 NA  | NA | NA | 8832800  | 9431500  | 14200000 NA |
| 14400000 NA | NA | NA | 2279500  | 3157000  | 14200000 NA |
| 6636300 NA  | NA | NA | 5950800  | 10800000 | 27100000 NA |
| 23600000 NA | NA | NA | 25800000 | 3.50E+07 | 63800000 NA |
| 14900000 NA | NA | NA | 5123800  | 12800000 | 13300000 NA |
| 3105700 NA  | NA | NA | 1595300  | 4350600  | 4553200 NA  |
| 5269400 NA  | NA | NA | 1452900  | 0        | 4210700 NA  |
| 11700000 NA | NA | NA | 0        | 0        | 3979500 NA  |
| 0 NA        | NA | NA | 423080   | 620210   | 2160800 NA  |
| 6368400 NA  | NA | NA | 5001400  | 8502300  | 23500000 NA |
| 4192700 NA  | NA | NA | 7528500  | 0        | 21700000 NA |
| 578900 NA   | NA | NA | 2831600  | 3678100  | 813090 NA   |
| 14900000 NA | NA | NA | 13800000 | 13300000 | 22700000 NA |
| 3030400 NA  | NA | NA | 0        | 2916200  | 6245000 NA  |
| 4773000 NA  | NA | NA | 2731700  | 4824900  | 12100000 NA |
| 1871800 NA  | NA | NA | 2149600  | 3668100  | 7307600 NA  |
| 2175100 NA  | NA | NA | 2148600  | 2643200  | 5418800 NA  |
| 8953200 NA  | NA | NA | 11200000 | 10400000 | 22800000 NA |
| 0 NA        | NA | NA | 0        | 7855800  | 0 NA        |
| 25900000 NA | NA | NA | 2.70E+07 | 35700000 | 59200000 NA |
| 908840 NA   | NA | NA | 1910800  | 2040800  | 6476400 NA  |
| 1005700 NA  | NA | NA | 2578400  | 2709500  | 5140700 NA  |
| 16700000 NA | NA | NA | 10200000 | 0        | 0 NA        |
| 1720900 NA  | NA | NA | 6242000  | 7508600  | 11700000 NA |
| 0 NA        | NA | NA | 0        | 0        | 0 NA        |
| 6454300 NA  | NA | NA | 3340900  | 7073100  | 8954500 NA  |
| 3535800 NA  | NA | NA | 6946500  | 13400000 | 16800000 NA |
| 13300000 NA | NA | NA | 4488900  | 5309400  | 1.70E+07 NA |
| 4757300 NA  | NA | NA | 0        | 0        | 1783100 NA  |
| 0 NA        | NA | NA | 0        | 0        | 0 NA        |
| 3292500 NA  | NA | NA | 4694100  | 4626900  | 12200000 NA |
| 2722900 NA  | NA | NA | 3428900  | 3489300  | 4156800 NA  |
| 0 NA        | NA | NA | 0        | 903060   | 2673900 NA  |
| 0 NA        | NA | NA | 0        | 11400000 | 6753300 NA  |
| 0 NA        | NA | NA | 1065700  | 0        | 4174600 NA  |
| 6705400 NA  | NA | NA | 0        | 0        | 4369500 NA  |
| 0 NA        | NA | NA | 0        | 0        | 0 NA        |
| 17900000 NA | NA | NA | 1542900  | 1431700  | 5439500 NA  |
| 3123000 NA  | NA | NA | 0        | 2573600  | 6659200 NA  |
| 7068300 NA  | NA | NA | 6535000  | 7622900  | 11400000 NA |



|            |    |    |         |          |             |
|------------|----|----|---------|----------|-------------|
| 2404100 NA | NA | NA | 0       | 0        | 0 NA        |
| 391870 NA  | NA | NA | 0       | 330470   | 3440200 NA  |
| 2446200 NA | NA | NA | 0       | 0        | 0 NA        |
| 4308800 NA | NA | NA | 1980600 | 2378500  | 3958800 NA  |
| 0 NA       | NA | NA | 0       | 2336600  | 845350 NA   |
| 9544300 NA | NA | NA | 6427700 | 7873600  | 11900000 NA |
| 9319700 NA | NA | NA | 4833100 | 4872000  | 0 NA        |
| 0 NA       | NA | NA | 3708900 | 1764800  | 601250 NA   |
| 0 NA       | NA | NA | 0       | 0        | 0 NA        |
| 0 NA       | NA | NA | 0       | 0        | 0 NA        |
| 5214600 NA | NA | NA | 1541200 | 3652500  | 9208900 NA  |
| 1902600 NA | NA | NA | 4403700 | 1476900  | 9594100 NA  |
| 476250 NA  | NA | NA | 1102900 | 3839400  | 0 NA        |
| 2375000 NA | NA | NA | 0       | 2711300  | 1989900 NA  |
| 0 NA       | NA | NA | 0       | 0        | 0 NA        |
| 0 NA       | NA | NA | 0       | 0        | 0 NA        |
| 1883200 NA | NA | NA | 1192700 | 3813900  | 3948000 NA  |
| 1774900 NA | NA | NA | 0       | 0        | 0 NA        |
| 0 NA       | NA | NA | 648770  | 2402200  | 860830 NA   |
| 0 NA       | NA | NA | 0       | 0        | 0 NA        |
| 8861100 NA | NA | NA | 8632700 | 10400000 | 27200000 NA |
| 2121200 NA | NA | NA | 0       | 0        | 0 NA        |
| 893760 NA  | NA | NA | 559620  | 669350   | 1991700 NA  |
| 8507200 NA | NA | NA | 0       | 0        | 5775900 NA  |
| 0 NA       | NA | NA | 0       | 0        | 0 NA        |
| 9959300 NA | NA | NA | 2024100 | 2288600  | 13100000 NA |
| 0 NA       | NA | NA | 0       | 0        | 0 NA        |
| 0 NA       | NA | NA | 7371300 | 0        | 0 NA        |
| 7061000 NA | NA | NA | 9487500 | 6782600  | 11800000 NA |
| 0 NA       | NA | NA | 387640  | 928810   | 1233200 NA  |
| 4951000 NA | NA | NA | 0       | 0        | 0 NA        |
| 340600 NA  | NA | NA | 303890  | 407270   | 796330 NA   |
| 0 NA       | NA | NA | 0       | 0        | 0 NA        |
| 4068200 NA | NA | NA | 0       | 2056700  | 4337800 NA  |
| 2022700 NA | NA | NA | 923520  | 3915700  | 5110700 NA  |
| 3469500 NA | NA | NA | 0       | 0        | 0 NA        |
| 8116800 NA | NA | NA | 3545600 | 6879800  | 4463900 NA  |
| 1314000 NA | NA | NA | 291780  | 1193300  | 1664200 NA  |
| 0 NA       | NA | NA | 325720  | 760170   | 936730 NA   |
| 1288500 NA | NA | NA | 1679800 | 2240500  | 5820000 NA  |
| 0 NA       | NA | NA | 0       | 0        | 0 NA        |
| 1905300 NA | NA | NA | 0       | 1512200  | 2513500 NA  |
| 0 NA       | NA | NA | 0       | 0        | 0 NA        |
| 0 NA       | NA | NA | 458010  | 0        | 1018000 NA  |
| 0 NA       | NA | NA | 0       | 0        | 0 NA        |
| 0 NA       | NA | NA | 0       | 0        | 0 NA        |
| 269110 NA  | NA | NA | 1904100 | 2660700  | 2588700 NA  |

|             |    |    |          |          |             |
|-------------|----|----|----------|----------|-------------|
| 683840 NA   | NA | NA | 710250   | 0        | 0 NA        |
| 897210 NA   | NA | NA | 0        | 0        | 0 NA        |
| 1451500 NA  | NA | NA | 0        | 3041300  | 3302100 NA  |
| 2025000 NA  | NA | NA | 2671300  | 3931600  | 5380100 NA  |
| 0 NA        | NA | NA | 0        | 0        | 0 NA        |
| 0 NA        | NA | NA | 0        | 0        | 0 NA        |
| 0 NA        | NA | NA | 0        | 0        | 0 NA        |
| 0 NA        | NA | NA | 0        | 0        | 0 NA        |
| 1.70E+07 NA | NA | NA | 23100000 | 35500000 | 58300000 NA |
| 0 NA        | NA | NA | 0        | 691830   | 819070 NA   |
| 1616000 NA  | NA | NA | 0        | 0        | 0 NA        |
| 0 NA        | NA | NA | 0        | 0        | 0 NA        |
| 0 NA        | NA | NA | 0        | 0        | 0 NA        |
| 0 NA        | NA | NA | 0        | 0        | 0 NA        |
| 0 NA        | NA | NA | 0        | 0        | 0 NA        |
| 4877600 NA  | NA | NA | 4822500  | 2971300  | 3326800 NA  |
| 1347300 NA  | NA | NA | 416060   | 1172600  | 1531700 NA  |
| 1815600 NA  | NA | NA | 0        | 3275500  | 3128600 NA  |
| 1021200 NA  | NA | NA | 0        | 0        | 0 NA        |
| 724610 NA   | NA | NA | 0        | 0        | 1.50E+07 NA |
| 0 NA        | NA | NA | 230980   | 2661400  | 2849300 NA  |
| 0 NA        | NA | NA | 0        | 0        | 0 NA        |
| 0 NA        | NA | NA | 0        | 0        | 0 NA        |
| 1977500 NA  | NA | NA | 1519300  | 3104200  | 7816300 NA  |
| 1351800 NA  | NA | NA | 0        | 0        | 2447400 NA  |
| 0 NA        | NA | NA | 0        | 0        | 0 NA        |
| 0 NA        | NA | NA | 0        | 3060100  | 0 NA        |
| 347630 NA   | NA | NA | 0        | 0        | 0 NA        |
| 274680 NA   | NA | NA | 425160   | 0        | 289090 NA   |
| 0 NA        | NA | NA | 0        | 0        | 0 NA        |
| 0 NA        | NA | NA | 0        | 3609500  | 611630 NA   |
| 0 NA        | NA | NA | 0        | 0        | 0 NA        |
| 3048300 NA  | NA | NA | 2404300  | 3557100  | 5497800 NA  |
| 2494700 NA  | NA | NA | 2517600  | 3433200  | 5419600 NA  |
| 2018200 NA  | NA | NA | 1292300  | 2019000  | 5146100 NA  |
| 0 NA        | NA | NA | 0        | 0        | 0 NA        |
| 0 NA        | NA | NA | 1288500  | 0        | 0 NA        |
| 1450200 NA  | NA | NA | 2789600  | 3076100  | 4632600 NA  |
| 0 NA        | NA | NA | 0        | 0        | 0 NA        |
| 0 NA        | NA | NA | 0        | 329820   | 348460 NA   |
| 0 NA        | NA | NA | 0        | 0        | 0 NA        |
| 0 NA        | NA | NA | 0        | 0        | 0 NA        |
| 4289800 NA  | NA | NA | 0        | 5878600  | 7573800 NA  |
| 1018600 NA  | NA | NA | 596950   | 1055000  | 1651800 NA  |
| 1540100 NA  | NA | NA | 822000   | 1918000  | 0 NA        |
| 1097200 NA  | NA | NA | 2427000  | 1333200  | 2048200 NA  |
| 0 NA        | NA | NA | 0        | 0        | 0 NA        |

|          |    |    |          |          |          |    |
|----------|----|----|----------|----------|----------|----|
| 951680   | NA | NA | 945340   | 609350   | 805050   | NA |
| 0        | NA | NA | 0        | 0        | 0        | NA |
| 0        | NA | NA | 0        | 0        | 0        | NA |
| 0        | NA | NA | 0        | 0        | 0        | NA |
| 1681700  | NA | NA | 0        | 2202200  | 0        | NA |
| 1533500  | NA | NA | 0        | 0        | 0        | NA |
| 1.67E+08 | NA | NA | 92400000 | 1.70E+08 | 1.82E+08 | NA |
| 0        | NA | NA | 0        | 0        | 0        | NA |
| 3109800  | NA | NA | 0        | 4080500  | 3425900  | NA |
| 5440500  | NA | NA | 1912100  | 4793500  | 6925400  | NA |
| 0        | NA | NA | 0        | 0        | 0        | NA |
| 2.22E+09 | NA | NA | 1.38E+09 | 1.77E+09 | 2.76E+09 | NA |
| 0        | NA | NA | 0        | 0        | 0        | NA |
| 1433100  | NA | NA | 0        | 2161600  | 751640   | NA |
| 0        | NA | NA | 0        | 0        | 0        | NA |
| 1202200  | NA | NA | 2179200  | 2758400  | 3493500  | NA |
| 0        | NA | NA | 0        | 0        | 0        | NA |
| 0        | NA | NA | 0        | 0        | 0        | NA |
| 0        | NA | NA | 0        | 0        | 0        | NA |
| 0        | NA | NA | 0        | 0        | 0        | NA |
| 0        | NA | NA | 0        | 0        | 0        | NA |
| 0        | NA | NA | 0        | 0        | 0        | NA |
| 1941900  | NA | NA | 1297600  | 0        | 0        | NA |
| 980610   | NA | NA | 1651400  | 0        | 3070400  | NA |
| 0        | NA | NA | 529340   | 955250   | 1162200  | NA |
| 0        | NA | NA | 0        | 772060   | 1591400  | NA |
| 0        | NA | NA | 0        | 0        | 0        | NA |
| 0        | NA | NA | 515260   | 830770   | 1349100  | NA |
| 538300   | NA | NA | 2203900  | 809880   | 1489500  | NA |
| 650960   | NA | NA | 1334000  | 1825400  | 0        | NA |
| 0        | NA | NA | 0        | 0        | 0        | NA |
| 0        | NA | NA | 0        | 2608700  | 7576400  | NA |
| 2179500  | NA | NA | 0        | 0        | 0        | NA |
| 1944900  | NA | NA | 1610100  | 1540600  | 0        | NA |
| 0        | NA | NA | 0        | 0        | 0        | NA |
| 0        | NA | NA | 0        | 0        | 0        | NA |
| 0        | NA | NA | 0        | 0        | 2069200  | NA |
| 0        | NA | NA | 0        | 259510   | 610730   | NA |
| 0        | NA | NA | 560990   | 876750   | 2014100  | NA |
| 0        | NA | NA | 0        | 2673400  | 2995800  | NA |
| 0        | NA | NA | 0        | 0        | 0        | NA |
| 1195800  | NA | NA | 1016100  | 948060   | 1396400  | NA |
| 0        | NA | NA | 0        | 0        | 0        | NA |
| 0        | NA | NA | 1004300  | 801030   | 0        | NA |
| 0        | NA | NA | 0        | 0        | 0        | NA |
| 1890900  | NA | NA | 1542900  | 1431700  | 4132900  | NA |
| 0        | NA | NA | 0        | 0        | 0        | NA |

|          |    |    |          |          |          |    |
|----------|----|----|----------|----------|----------|----|
| 1213700  | NA | NA | 0        | 0        | 0        | NA |
| 0        | NA | NA | 0        | 0        | 0        | NA |
| 2018700  | NA | NA | 1091800  | 2100500  | 2944800  | NA |
| 0        | NA | NA | 2013900  | 0        | 3321400  | NA |
| 3373100  | NA | NA | 0        | 1198500  | 0        | NA |
| 0        | NA | NA | 0        | 0        | 0        | NA |
| 0        | NA | NA | 1136800  | 1541700  | 1522000  | NA |
| 0        | NA | NA | 0        | 0        | 0        | NA |
| 0        | NA | NA | 1033800  | 0        | 0        | NA |
| 0        | NA | NA | 18500000 | 0        | 41900000 | NA |
| 0        | NA | NA | 0        | 0        | 0        | NA |
| 6584600  | NA | NA | 0        | 0        | 0        | NA |
| 0        | NA | NA | 1686200  | 563190   | 607400   | NA |
| 0        | NA | NA | 0        | 0        | 0        | NA |
| 0        | NA | NA | 449470   | 0        | 1120100  | NA |
| 8018500  | NA | NA | 5846000  | 6992400  | 16100000 | NA |
| 0        | NA | NA | 0        | 0        | 999560   | NA |
| 0        | NA | NA | 0        | 2485200  | 0        | NA |
| 0        | NA | NA | 0        | 0        | 0        | NA |
| 0        | NA | NA | 0        | 1932800  | 0        | NA |
| 0        | NA | NA | 0        | 0        | 0        | NA |
| 896960   | NA | NA | 0        | 0        | 1316300  | NA |
| 0        | NA | NA | 0        | 0        | 0        | NA |
| 0        | NA | NA | 0        | 0        | 0        | NA |
| 0        | NA | NA | 750830   | 953790   | 5664600  | NA |
| 0        | NA | NA | 0        | 0        | 0        | NA |
| 0        | NA | NA | 0        | 0        | 0        | NA |
| 0        | NA | NA | 0        | 0        | 0        | NA |
| 0        | NA | NA | 0        | 0        | 0        | NA |
| 0        | NA | NA | 0        | 0        | 0        | NA |
| 0        | NA | NA | 0        | 7163500  | 0        | NA |
| 11500000 | NA | NA | 1.20E+07 | 18900000 | 25500000 | NA |
| 0        | NA | NA | 0        | 0        | 0        | NA |
| 0        | NA | NA | 0        | 0        | 0        | NA |
| 0        | NA | NA | 0        | 0        | 0        | NA |
| 0        | NA | NA | 34800000 | 55700000 | 94700000 | NA |
| 4520100  | NA | NA | 0        | 3445600  | 4941900  | NA |
| 0        | NA | NA | 0        | 0        | 0        | NA |
| 0        | NA | NA | 0        | 0        | 0        | NA |
| 0        | NA | NA | 0        | 83200000 | 0        | NA |
| 0        | NA | NA | 0        | 0        | 0        | NA |
| 19600000 | NA | NA | 22800000 | 20800000 | 32200000 | NA |
| 0        | NA | NA | 0        | 0        | 0        | NA |
| 0        | NA | NA | 0        | 0        | 0        | NA |
| 3200200  | NA | NA | 4078800  | 4988600  | 6642100  | NA |
| 3764900  | NA | NA | 9276000  | 16200000 | 23100000 | NA |
| 3044300  | NA | NA | 3202100  | 2971300  | 3326800  | NA |

|          |          |          |          |          |          |          |          |
|----------|----------|----------|----------|----------|----------|----------|----------|
| 4226600  | NA       | NA       | NA       | 0        | 0        | 3196900  | NA       |
| 0        | NA       | NA       | NA       | 0        | 0        | 0        | NA       |
| 0        | NA       | NA       | NA       | 0        | 0        | 0        | NA       |
| 0        | NA       | NA       | NA       | 986860   | 1615400  | 0        | NA       |
| 0        | NA       | NA       | NA       | 0        | 0        | 0        | NA       |
| 0        | NA       | NA       | NA       | 0        | 0        | 0        | NA       |
| 0        | NA       | NA       | NA       | 1386800  | 1284800  | 1479200  | NA       |
| 0        | NA       | NA       | NA       | 0        | 0        | 0        | NA       |
| 0        | NA       | NA       | NA       | 0        | 0        | 0        | NA       |
| 0        | NA       | NA       | NA       | 0        | 0        | 0        | NA       |
| 2422400  | NA       | NA       | NA       | 2821500  | 3619900  | 5464700  | NA       |
| 8903400  | NA       | NA       | NA       | 6408600  | 11700000 | 15900000 | NA       |
| 0        | NA       | NA       | NA       | 0        | 0        | 0        | NA       |
| 0        | NA       | NA       | NA       | 0        | 0        | 0        | NA       |
| 1713600  | NA       | NA       | NA       | 2753200  | 4170700  | 5963100  | NA       |
| 2362700  | NA       | NA       | NA       | 1167700  | 3805600  | 3774600  | NA       |
| NA       | 9302200  | 15200000 | 27300000 | NA       | NA       | NA       | 0        |
| 0        | NA       | NA       | NA       | 0        | 0        | 0        | NA       |
| 61800000 | NA       | NA       | NA       | 44800000 | 5.10E+07 | 1.00E+08 | NA       |
| NA       | 1069300  | 1275500  | 0        | NA       | NA       | NA       | 0        |
| 883980   | NA       | NA       | NA       | 537480   | 716280   | 1527400  | NA       |
| NA       | 0        | 0        | 0        | NA       | NA       | NA       | 0        |
| NA       | 35500000 | 11800000 | 37900000 | NA       | NA       | NA       | 6962100  |
| 2725800  | NA       | NA       | NA       | 3211700  | 4249400  | 7553400  | NA       |
| 0        | NA       | NA       | NA       | 542310   | 1022900  | 3050200  | NA       |
| NA       | 3298700  | 24100000 | 37400000 | NA       | NA       | NA       | 3826800  |
| NA       | 4105300  | 3902100  | 7216900  | NA       | NA       | NA       | 1051900  |
| NA       | 0        | 0        | 0        | NA       | NA       | NA       | 0        |
| 0        | NA       | NA       | NA       | 0        | 0        | 0        | NA       |
| NA       | 9.44E+08 | 9.04E+08 | 1.37E+09 | NA       | NA       | NA       | 2.56E+09 |
| 4717300  | NA       | NA       | NA       | 0        | 4346000  | 9454200  | NA       |
| NA       | 0        | 0        | 0        | NA       | NA       | NA       | 0        |
| NA       | 3.24E+08 | 2.47E+08 | 3.88E+08 | NA       | NA       | NA       | 27400000 |
| 21800000 | NA       | NA       | NA       | 9076100  | 9936800  | 25100000 | NA       |
| 4648700  | 0        | 0        | 0        | 0        | 0        | 0        | 0        |
| 6616700  | NA       | NA       | NA       | 2125700  | 4570700  | 12400000 | NA       |
| NA       | 1.16E+08 | 1.12E+08 | 1.35E+08 | NA       | NA       | NA       | 2.73E+08 |
| NA       | 8351700  | 9924900  | 11300000 | NA       | NA       | NA       | 0        |
| NA       | 4050000  | 0        | 0        | NA       | NA       | NA       | 429440   |
| 1259800  | NA       | NA       | NA       | 718190   | 1212100  | 633900   | NA       |
| NA       | 3607200  | 224690   | 4129000  | NA       | NA       | NA       | 0        |
| NA       | 484780   | 10700000 | 28400000 | NA       | NA       | NA       | 0        |
| NA       | 93400000 | 82200000 | 1.40E+08 | NA       | NA       | NA       | 47500000 |
| 13600000 | NA       | NA       | NA       | 2858700  | 5592100  | 6516400  | NA       |
| 2722600  | NA       | NA       | NA       | 2036800  | 1449500  | 4620600  | NA       |
| 0        | NA       | NA       | NA       | 7585800  | 6301300  | 1599700  | NA       |

|    |          |          |          |         |    |          |          |
|----|----------|----------|----------|---------|----|----------|----------|
| NA | 3249300  | 3347300  | 9126700  | NA      | NA | NA       | 0        |
| NA | 5543300  | 0        | 870810   | NA      | NA | NA       | 1322500  |
| NA | 73800000 | 8.70E+07 | 91700000 | NA      | NA | NA       | 66300000 |
| NA | 0        | 2395600  | 0        | NA      | NA | NA       | 0        |
| 0  | NA       | NA       | NA       | 1080200 | 0  | 12800000 | NA       |

| FR_4.1.M | FR7.1.M  | FR1.2.M  | FR4.2.M  | FR7.2.M  | F1.1     | F4.1     | F8.1     | F1.2     |
|----------|----------|----------|----------|----------|----------|----------|----------|----------|
| 9.73E+09 | 7.12E+09 | 1.79E+09 | 2.67E+09 | 3.07E+09 | 1.12E+09 | 1.15E+09 | 2.84E+09 | 2.94E+08 |
| 8.07E+08 | 1.30E+09 | 3.10E+08 | 2.05E+08 | 5.40E+08 | 4.22E+09 | 3.06E+09 | 3.41E+09 | 1.03E+09 |
| 6.72E+08 | 1.34E+09 | 1.72E+08 | 1.47E+08 | 4.52E+08 | 8.07E+09 | 5.66E+09 | 7.17E+09 | 1.67E+09 |
| 2.07E+09 | 1.72E+09 | 7.38E+08 | 4.82E+08 | 6.52E+08 | 2.77E+09 | 1.98E+09 | 2.45E+09 | 6.47E+08 |
| 3.56E+09 | 2.88E+09 | 1.62E+09 | 1.05E+09 | 1.31E+09 | 3.64E+09 | 2.19E+09 | 2.52E+09 | 8.10E+08 |
| 8.51E+09 | 3.13E+09 | 1.23E+09 | 2.25E+09 | 1.39E+09 | 1.06E+09 | 7.37E+08 | 1.91E+09 | 2.94E+08 |
| 1.29E+10 | 8.96E+09 | 2.35E+09 | 3.19E+09 | 3.24E+09 | 2.35E+09 | 1.42E+09 | 3.80E+09 | 5.08E+08 |
| 2.60E+08 | 9.99E+08 | 6.10E+07 | 57600000 | 4.46E+08 | 1.04E+10 | 7.18E+09 | 8.94E+09 | 2.54E+09 |
| 3.46E+09 | 2.28E+09 | 1.22E+09 | 7.99E+08 | 9.32E+08 | 3.22E+09 | 2.12E+09 | 2.57E+09 | 7.87E+08 |
| 3.90E+08 | 4.36E+08 | 1.85E+08 | 1.13E+08 | 2.35E+08 | 1.15E+09 | 9.54E+08 | 1.11E+09 | 3.37E+08 |
| 4.47E+09 | 3.44E+09 | 1.69E+09 | 1.14E+09 | 1.34E+09 | 3.65E+09 | 2.67E+09 | 2.89E+09 | 9.96E+08 |
| 7.51E+09 | 8.61E+09 | 1.99E+09 | 2.64E+09 | 4.32E+09 | 1.41E+09 | 7.64E+08 | 2.85E+09 | 3.75E+08 |
| 1.11E+09 | 9.23E+08 | 3.99E+08 | 2.76E+08 | 3.91E+08 | 3.11E+09 | 2.18E+09 | 2.46E+09 | 6.74E+08 |
| 3.12E+09 | 2.17E+09 | 8.11E+08 | 7.01E+08 | 7.41E+08 | 2.38E+09 | 1.55E+09 | 1.80E+09 | 5.38E+08 |
| 3.79E+09 | 2.57E+09 | 1.21E+09 | 7.73E+08 | 9.24E+08 | 1.50E+09 | 1.45E+09 | 1.32E+09 | 3.04E+08 |
| 1.16E+08 | 1.03E+08 | 30100000 | 27600000 | 49500000 | 1.92E+08 | 1.56E+08 | 1.62E+08 | 79700000 |
| 28400000 | 5.50E+07 | 19800000 | 6981500  | 27200000 | 4.69E+08 | 3.21E+08 | 4.25E+08 | 1.05E+08 |
| 2.55E+08 | 4.69E+08 | 1.06E+08 | 6.80E+07 | 2.59E+08 | 2.76E+09 | 1.84E+09 | 2.32E+09 | 6.22E+08 |
| 22100000 | 41100000 | 4238200  | 1210400  | 17600000 | 5.87E+08 | 3.48E+08 | 4.50E+08 | 1.42E+08 |
| 1.00E+07 | 47700000 | 942830   | 4691000  | 18400000 | 1.04E+09 | 6.48E+08 | 8.07E+08 | 2.08E+08 |
| 1.28E+08 | 1.46E+08 | 39500000 | 33200000 | 74700000 | 1.20E+09 | 7.72E+08 | 9.91E+08 | 2.66E+08 |
| 1.17E+09 | 8.85E+08 | 4.25E+08 | 2.72E+08 | 3.53E+08 | 2.41E+09 | 1.67E+09 | 1.90E+09 | 5.28E+08 |
| 9.31E+08 | 7.25E+08 | 3.80E+08 | 2.83E+08 | 3.43E+08 | 7.00E+08 | 4.21E+08 | 5.66E+08 | 1.82E+08 |
| 1.16E+09 | 1.13E+09 | 2.93E+08 | 2.69E+08 | 5.12E+08 | 2.27E+09 | 1.77E+09 | 1.77E+09 | 4.98E+08 |
| 4.36E+09 | 3.24E+09 | 1.25E+09 | 8.59E+08 | 9.65E+08 | 1.19E+09 | 1.38E+09 | 1.02E+09 | 3.51E+08 |
| 3.30E+07 | 1.46E+08 | 1.30E+07 | 6161600  | 51700000 | 1.19E+09 | 7.71E+08 | 8.91E+08 | 2.35E+08 |
| 14600000 | 20500000 | 10900000 | 5602000  | 21600000 | 4.10E+08 | 2.64E+08 | 3.51E+08 | 92800000 |
| 2.43E+09 | 2.88E+09 | 9.66E+08 | 9.97E+08 | 1.12E+09 | 1.94E+09 | 1.79E+09 | 1.61E+09 | 6.63E+08 |
| 27400000 | 1.20E+08 | 6506500  | 6317500  | 54500000 | 1.42E+09 | 9.35E+08 | 1.11E+09 | 3.35E+08 |
| 4.40E+09 | 3.44E+09 | 1.45E+09 | 8.51E+08 | 9.58E+08 | 1.33E+09 | 1.34E+09 | 1.35E+09 | 2.37E+08 |
| 5.92E+08 | 5.06E+08 | 2.02E+08 | 1.54E+08 | 2.13E+08 | 3.22E+08 | 3.06E+08 | 3.00E+08 | 61700000 |
| 3.04E+09 | 2.41E+09 | 8.39E+08 | 8.66E+08 | 1.02E+09 | 2.01E+09 | 9.05E+08 | 1.26E+09 | 4.05E+08 |
| 1.65E+08 | 2.87E+08 | 50400000 | 34900000 | 1.37E+08 | 1.03E+09 | 7.35E+08 | 8.33E+08 | 2.17E+08 |
| 9.24E+08 | 5.90E+08 | 3.82E+08 | 2.27E+08 | 2.97E+08 | 5.11E+08 | 4.35E+08 | 6.02E+08 | 1.67E+08 |
| 96300000 | 1.39E+08 | 27600000 | 21500000 | 77400000 | 9.44E+08 | 6.81E+08 | 7.87E+08 | 2.32E+08 |
| 4116200  | 28700000 | 1855500  | 3752700  | 16700000 | 4.59E+08 | 3.32E+08 | 3.30E+08 | 9.90E+07 |
| 13400000 | 37700000 | 2455800  | 2370800  | 15500000 | 3.75E+08 | 2.58E+08 | 3.13E+08 | 79700000 |
| 8.18E+08 | 6.88E+08 | 2.22E+08 | 1.92E+08 | 2.21E+08 | 1.39E+09 | 1.14E+09 | 1.07E+09 | 3.11E+08 |
| 32200000 | 63600000 | 1760100  | 7851600  | 27200000 | 4.20E+08 | 3.73E+08 | 3.50E+08 | 1.16E+08 |
| 96400000 | 1.26E+08 | 22600000 | 20700000 | 42300000 | 3.64E+08 | 2.90E+08 | 3.92E+08 | 60800000 |
| 14100000 | 31800000 | 4510900  | 4788400  | 9652300  | 1.70E+08 | 84200000 | 1.19E+08 | 50900000 |
| 68800000 | 77800000 | 29900000 | 25400000 | 41700000 | 1.47E+08 | 97500000 | 1.11E+08 | 42500000 |
| 6286100  | 41400000 | 1888200  | 1839200  | 26600000 | 5.71E+08 | 3.56E+08 | 4.03E+08 | 97700000 |
| 5.75E+08 | 8.81E+08 | 2.17E+08 | 1.56E+08 | 65800000 | 45700000 | 42700000 | 27200000 | 2620800  |
| 64100000 | 1.18E+08 | 15900000 | 19900000 | 51800000 | 8.19E+08 | 4.62E+08 | 5.95E+08 | 1.83E+08 |

|          |          |          |          |          |          |          |          |          |
|----------|----------|----------|----------|----------|----------|----------|----------|----------|
| 40400000 | 26500000 | 5493600  | 10200000 | 12100000 | 0        | 2482800  | 2254800  | 0        |
| 18900000 | 41400000 | 637690   | 5497100  | 20200000 | 4.24E+08 | 1.95E+08 | 2.54E+08 | 99400000 |
| 61200000 | 86800000 | 16700000 | 1.50E+07 | 35800000 | 6.38E+08 | 3.83E+08 | 4.63E+08 | 1.43E+08 |
| 1.02E+08 | 1.71E+08 | 21400000 | 25200000 | 8.00E+07 | 1.13E+09 | 7.02E+08 | 9.41E+08 | 2.54E+08 |
| 6.60E+07 | 1.10E+08 | 44200000 | 20500000 | 45700000 | 1.76E+08 | 1.52E+08 | 1.52E+08 | 44200000 |
| 1.20E+07 | 19300000 | 3257800  | 2263000  | 8162700  | 1.13E+08 | 74300000 | 90100000 | 32600000 |
| 24500000 | 9.40E+07 | 29300000 | 5211800  | 35900000 | 3.20E+08 | 2.02E+08 | 2.29E+08 | 61100000 |
| 1.10E+07 | 53400000 | 3775300  | 4306200  | 18700000 | 1.54E+08 | 1.35E+08 | 1.47E+08 | 36800000 |
| 17300000 | 38900000 | 5806500  | 3915700  | 1.80E+07 | 3.09E+08 | 2.16E+08 | 2.01E+08 | 53200000 |
| 21300000 | 47700000 | 6137400  | 4495700  | 16200000 | 3.55E+08 | 1.92E+08 | 3.20E+08 | 69800000 |
| 1.78E+08 | 1.98E+08 | 1.22E+08 | 38700000 | 94100000 | 1.03E+08 | 0        | 0        | 1909500  |
| 26700000 | 5.30E+07 | 8212700  | 2944800  | 27600000 | 3.26E+08 | 1.82E+08 | 2.15E+08 | 56100000 |
| 3521600  | 16900000 | 1516700  | 1944000  | 16800000 | 4.77E+08 | 3.23E+08 | 3.70E+08 | 1.16E+08 |
| 4529400  | 4228800  | 12500000 | 1043300  | 4190400  | 3.67E+08 | 2.79E+08 | 2.25E+08 | 85500000 |
| 1.07E+08 | 2.50E+08 | 24400000 | 26800000 | 98300000 | 1.81E+09 | 1.16E+09 | 1.15E+09 | 4.81E+08 |
| 1.27E+08 | 76800000 | 56900000 | 19200000 | 31300000 | 2.14E+08 | 1.43E+08 | 1.75E+08 | 53200000 |
| 5287300  | 18200000 | 3064300  | 1257700  | 8973300  | 97500000 | 57100000 | 72200000 | 25200000 |
| 22800000 | 45300000 | 7974700  | 5465300  | 15100000 | 1.52E+08 | 1.15E+08 | 1.29E+08 | 36200000 |
| 588290   | 11100000 | 1757300  | 985500   | 3212400  | 62400000 | 5.60E+07 | 46100000 | 14200000 |
| 0        | 18200000 | 1610300  | 1358900  | 11500000 | 1.10E+08 | 92700000 | 1.38E+08 | 26700000 |
| 29900000 | 69700000 | 10600000 | 6439400  | 30800000 | 2.29E+08 | 2.28E+08 | 2.53E+08 | 82300000 |
| 24900000 | 30100000 | 4236100  | 5118700  | 11500000 | 1.50E+08 | 92100000 | 1.16E+08 | 36700000 |
| 8606100  | 37300000 | 2353600  | 3554400  | 17300000 | 3.61E+08 | 2.19E+08 | 2.82E+08 | 73100000 |
| 2150600  | 3166500  | 0        | 0        | 0        | 3.57E+08 | 2.50E+08 | 3.29E+08 | 1.01E+08 |
| 3107900  | 7901000  | 1012500  | 985510   | 3700300  | 1.71E+08 | 1.05E+08 | 1.47E+08 | 35900000 |
| 92200000 | 98100000 | 6201900  | 20200000 | 49600000 | 0        | 2790700  | 29600000 | 0        |
| 68100000 | 1.48E+08 | 20500000 | 19900000 | 75300000 | 1.83E+09 | 1.38E+09 | 1.49E+09 | 4.81E+08 |
| 1.15E+08 | 1.17E+08 | 85200000 | 24300000 | 60200000 | 2.04E+08 | 2.13E+08 | 1.63E+08 | 58200000 |
| 26500000 | 47300000 | 7657400  | 7147400  | 22100000 | 3.38E+08 | 2.39E+08 | 2.68E+08 | 67900000 |
| 33300000 | 49500000 | 5051900  | 6994200  | 22100000 | 2.93E+08 | 1.69E+08 | 2.01E+08 | 57200000 |
| 28300000 | 0        | 590450   | 0        | 0        | 0        | 0        | 0        | 0        |
| 267160   | 12500000 | 6163800  | 564600   | 5976000  | 48600000 | 3.30E+07 | 56900000 | 10500000 |
| 62800000 | 1.05E+08 | 25800000 | 41600000 | 52600000 | 6.32E+08 | 3.84E+08 | 5.86E+08 | 1.91E+08 |
| 0        | 6664400  | 0        | 0        | 3271900  | 2.97E+08 | 2.46E+08 | 3.30E+08 | 73200000 |
| 4299700  | 13100000 | 1415800  | 5180700  | 4917200  | 59900000 | 49400000 | 47400000 | 1.70E+07 |
| 5433600  | 5378000  | 1566000  | 1597800  | 5093800  | 2.82E+08 | 1.54E+08 | 2.77E+08 | 67200000 |
| 1.54E+08 | 98400000 | 73300000 | 54300000 | 60500000 | 88500000 | 69700000 | 89200000 | 34800000 |
| 54600000 | 70700000 | 36100000 | 11700000 | 74800000 | 22900000 | 5580400  | 21100000 | 4931100  |
| 27100000 | 14400000 | 4120100  | 1037800  | 19400000 | 2.14E+08 | 1.69E+08 | 1.68E+08 | 52500000 |
| 1476500  | 3304600  | 0        | 1299500  | 5261500  | 54900000 | 4.50E+07 | 36500000 | 15700000 |
| 0        | 7423200  | 474130   | 360830   | 1108000  | 43600000 | 44900000 | 54700000 | 1.30E+07 |
| 3456800  | 7099700  | 2236000  | 6222400  | 9537300  | 42700000 | 35800000 | 38800000 | 14700000 |
| 15100000 | 9727100  | 1575900  | 0        | 5698600  | 1.79E+08 | 1.56E+08 | 1.76E+08 | 4.90E+07 |
| 2589200  | 21900000 | 2447200  | 0        | 5157700  | 53700000 | 47100000 | 58500000 | 16300000 |
| 1.27E+08 | 82100000 | 40100000 | 30400000 | 57300000 | 2.91E+08 | 1.61E+08 | 1.80E+08 | 65900000 |
| 0        | 2873300  | 285830   | 262260   | 1829600  | 36300000 | 34600000 | 20600000 | 8366700  |
| 9526200  | 16200000 | 2676000  | 1619000  | 1900600  | 28800000 | 11400000 | 18900000 | 3038100  |



|          |          |          |          |          |          |          |          |          |
|----------|----------|----------|----------|----------|----------|----------|----------|----------|
| 10500000 | 1.80E+07 | 598530   | 1720900  | 8499700  | 5.90E+07 | 71900000 | 86500000 | 17200000 |
| 17900000 | 3.20E+07 | 12300000 | 3860800  | 11600000 | 19900000 | 26300000 | 24600000 | 8940800  |
| 17400000 | 39400000 | 1130100  | 3888200  | 18100000 | 1.23E+08 | 9.00E+07 | 1.13E+08 | 30100000 |
| 7557900  | 6732300  | 1294600  | 1015100  | 4299700  | 3.30E+07 | 24100000 | 30200000 | 9495400  |
| 0        | 22200000 | 819790   | 264430   | 9069500  | 34800000 | 21800000 | 1.30E+07 | 5566800  |
| 8541100  | 8147200  | 759540   | 2373100  | 8578900  | 1.37E+08 | 71800000 | 1.05E+08 | 39700000 |
| 11800000 | 14500000 | 3017600  | 3045000  | 3167400  | 51200000 | 30700000 | 34800000 | 10500000 |
| 5178700  | 24100000 | 2990300  | 2959300  | 7986200  | 4.32E+08 | 2.95E+08 | 4.90E+08 | 98600000 |
| 1249000  | 7591200  | 1565300  | 2148600  | 8019900  | 35400000 | 3.00E+07 | 36800000 | 8552200  |
| 77400000 | 1.50E+08 | 75800000 | 38900000 | 49600000 | 8110600  | 0        | 0        | 0        |
| 92200000 | 84900000 | 28400000 | 26800000 | 49900000 | 5.23E+08 | 4.21E+08 | 3.37E+08 | 1.62E+08 |
| 1.62E+08 | 1.29E+08 | 59200000 | 46200000 | 53600000 | 1.18E+08 | 39200000 | 76400000 | 2.50E+07 |
| 5112700  | 44300000 | 9109300  | 1063900  | 19600000 | 2.19E+08 | 1.55E+08 | 1.94E+08 | 6.00E+07 |
| 1.50E+07 | 6562900  | 11800000 | 2968600  | 13300000 | 60500000 | 36700000 | 29900000 | 17400000 |
| 0        | 0        | 0        | 0        | 0        | 2.25E+08 | 1.64E+08 | 1.71E+08 | 5.40E+07 |
| 12800000 | 55800000 | 4297700  | 3631700  | 15100000 | 3.24E+08 | 2.34E+08 | 2.74E+08 | 6.40E+07 |
| 3527000  | 2843500  | 613510   | 559470   | 0        | 1.12E+08 | 9.70E+07 | 74900000 | 31200000 |
| 0        | 10500000 | 2084200  | 1575600  | 5504500  | 1.93E+08 | 1.37E+08 | 1.52E+08 | 5.40E+07 |
| 2589800  | 11600000 | 992180   | 373340   | 9820300  | 1.25E+08 | 52200000 | 80100000 | 26800000 |
| 0        | 8205600  | 0        | 0        | 4024900  | 2.14E+08 | 1.64E+08 | 2.05E+08 | 4.30E+07 |
| 19400000 | 1.90E+07 | 4012200  | 4073900  | 7597400  | 4181900  | 0        | 4410800  | 0        |
| 35500000 | 43200000 | 4601400  | 5742600  | 18600000 | 0        | 0        | 1764500  | 0        |
| 1.20E+07 | 20200000 | 4685800  | 4208100  | 5155400  | 43100000 | 47400000 | 47400000 | 12100000 |
| 6240000  | 9578000  | 1085400  | 991730   | 3414300  | 80500000 | 1.02E+08 | 1.17E+08 | 40600000 |
| 10800000 | 21700000 | 4370000  | 2877400  | 12300000 | 43400000 | 49600000 | 47200000 | 1.90E+07 |
| 0        | 0        | 0        | 559990   | 2429000  | 27500000 | 32300000 | 4.00E+07 | 9114100  |
| 12800000 | 23300000 | 1542800  | 3790100  | 4677800  | 2.01E+08 | 1.59E+08 | 2.00E+08 | 58300000 |
| 15700000 | 42800000 | 12300000 | 9513600  | 14400000 | 2.27E+08 | 1.34E+08 | 1.73E+08 | 41800000 |
| 6186500  | 4831600  | 3140200  | 1764900  | 4457700  | 85400000 | 65200000 | 61100000 | 23700000 |
| 0        | 3472400  | 0        | 682130   | 0        | 4.60E+07 | 45300000 | 49600000 | 10300000 |
| 3.42E+08 | 2.17E+08 | 1.27E+08 | 77700000 | 9.80E+07 | 1.28E+08 | 1.01E+08 | 1.24E+08 | 3.70E+07 |
| 11800000 | 14800000 | 1110100  | 2575900  | 7456500  | 1.35E+08 | 1.19E+08 | 1.21E+08 | 28400000 |
| 10500000 | 9534500  | 4711000  | 1831500  | 4662700  | 16900000 | 16700000 | 27500000 | 7562900  |
| 0        | 6178600  | 195880   | 459490   | 2131200  | 46500000 | 32800000 | 37900000 | 15300000 |
| 211080   | 2389500  | 1357600  | 1547200  | 3106700  | 30700000 | 51700000 | 86500000 | 9398100  |
| 1462300  | 4565200  | 0        | 0        | 2402800  | 12500000 | 14600000 | 1.40E+07 | 6782800  |
| 0        | 5790400  | 375610   | 0        | 4035300  | 39300000 | 36400000 | 47500000 | 13500000 |
| 17600000 | 16400000 | 22700000 | 8186300  | 14600000 | 51200000 | 32700000 | 43500000 | 16600000 |
| 1146500  | 0        | 0        | 0        | 2325100  | 43900000 | 21700000 | 45300000 | 5432800  |
| 18100000 | 37700000 | 6973700  | 4226100  | 18200000 | 1.88E+08 | 2.48E+08 | 2.43E+08 | 65600000 |
| 32500000 | 44600000 | 14600000 | 7830700  | 14500000 | 74500000 | 87200000 | 1.06E+08 | 9141600  |
| 0        | 0        | 0        | 0        | 0        | 37600000 | 21400000 | 27600000 | 6459900  |
| 19900000 | 24900000 | 5092300  | 5565800  | 11800000 | 0        | 0        | 0        | 0        |
| 0        | 0        | 0        | 0        | 0        | 1.15E+08 | 1.01E+08 | 1.03E+08 | 24800000 |
| 0        | 2502700  | 0        | 0        | 588420   | 4.00E+07 | 25500000 | 33800000 | 5174700  |
| 0        | 1456300  | 0        | 0        | 988890   | 85400000 | 17200000 | 43700000 | 6696900  |
| 0        | 10700000 | 1258400  | 0        | 7129600  | 0        | 0        | 9082000  | 2535300  |

|          |          |          |          |          |          |          |          |          |
|----------|----------|----------|----------|----------|----------|----------|----------|----------|
| 11700000 | 19200000 | 12700000 | 4433900  | 12200000 | 2456400  | 5092600  | 8860000  | 0        |
| 21400000 | 1.70E+07 | 17400000 | 7234800  | 12700000 | 19100000 | 15700000 | 16400000 | 6227200  |
| 2323000  | 6306100  | 5062700  | 3740200  | 3190300  | 16100000 | 1.10E+07 | 11700000 | 3486800  |
| 615060   | 5567000  | 1870700  | 398340   | 4074300  | 44800000 | 50200000 | 20400000 | 9580800  |
| 1.02E+08 | 1.25E+08 | 4.80E+07 | 34100000 | 31800000 | 2.30E+08 | 44800000 | 1.13E+08 | 43100000 |
| 0        | 600630   | 0        | 0        | 1103000  | 14500000 | 13900000 | 18700000 | 5052900  |
| 579150   | 3563800  | 0        | 368110   | 3074800  | 24200000 | 18200000 | 13400000 | 4112600  |
| 10300000 | 7416100  | 2335500  | 2152700  | 6581300  | 74400000 | 55700000 | 4.60E+07 | 1.40E+07 |
| 16800000 | 14900000 | 18300000 | 6116800  | 1.20E+07 | 0        | 0        | 0        | 0        |
| 19700000 | 32600000 | 8504800  | 2144600  | 11400000 | 34300000 | 38500000 | 2295200  | 8580500  |
| 30500000 | 20800000 | 3771000  | 5167000  | 5408100  | 3.26E+08 | 2.03E+08 | 3.15E+08 | 78900000 |
| 2.10E+07 | 46900000 | 17100000 | 4723900  | 11700000 | 17600000 | 50200000 | 3.10E+07 | 1.40E+07 |
| 28100000 | 19400000 | 10300000 | 7588800  | 4161900  | 41600000 | 18600000 | 15300000 | 3687800  |
| 1.20E+07 | 1.40E+07 | 6518000  | 2018100  | 4593700  | 1.36E+08 | 82800000 | 1.90E+08 | 31800000 |
| 0        | 204010   | 220950   | 0        | 1648000  | 39700000 | 26600000 | 33300000 | 11400000 |
| 3381500  | 13300000 | 2963500  | 944030   | 5045500  | 38800000 | 30700000 | 32500000 | 13700000 |
| 17100000 | 23300000 | 6980300  | 3431400  | 7418000  | 4.80E+07 | 24500000 | 29300000 | 7072300  |
| 8037900  | 22200000 | 12200000 | 2236800  | 9389200  | 0        | 0        | 4373200  | 0        |
| 0        | 10400000 | 250650   | 531210   | 2708700  | 62700000 | 42700000 | 60400000 | 15300000 |
| 0        | 0        | 0        | 0        | 452200   | 52800000 | 39900000 | 39500000 | 6822400  |
| 364850   | 0        | 0        | 642790   | 1467500  | 3.50E+07 | 23400000 | 31900000 | 9176400  |
| 13800000 | 24200000 | 6146500  | 1630600  | 1.20E+07 | 1.19E+08 | 89600000 | 1.13E+08 | 30900000 |
| 9245200  | 8815300  | 13800000 | 3204400  | 7807600  | 0        | 0        | 4557400  | 0        |
| 0        | 3216200  | 0        | 0        | 2134100  | 4483300  | 14800000 | 9669200  | 4410800  |
| 0        | 2116700  | 859990   | 0        | 0        | 0        | 0        | 0        | 0        |
| 14400000 | 14300000 | 1251100  | 2323100  | 5171200  | 0        | 0        | 0        | 0        |
| 0        | 7667900  | 1016600  | 0        | 1650900  | 58800000 | 50200000 | 60200000 | 10900000 |
| 1498900  | 1907100  | 525920   | 398560   | 885530   | 20100000 | 8477900  | 8509600  | 5679700  |
| 2940700  | 10300000 | 1931700  | 1446000  | 4545600  | 35400000 | 17300000 | 28800000 | 6898100  |
| 1598700  | 11500000 | 8489600  | 1323300  | 472920   | 0        | 0        | 0        | 0        |
| 0        | 11100000 | 353730   | 0        | 2088300  | 83800000 | 25900000 | 37100000 | 12700000 |
| 0        | 3722200  | 0        | 0        | 1844700  | 61300000 | 61200000 | 36900000 | 25100000 |
| 20500000 | 20800000 | 7448600  | 6807300  | 7176300  | 41400000 | 11100000 | 3.50E+07 | 10700000 |
| 6242400  | 18700000 | 2496900  | 0        | 1737000  | 31800000 | 52400000 | 42500000 | 9196200  |
| 0        | 3059200  | 904050   | 0        | 3863200  | 43300000 | 29400000 | 31700000 | 10800000 |
| 0        | 0        | 0        | 0        | 0        | 53100000 | 23500000 | 34100000 | 7024500  |
| 0        | 4140800  | 0        | 0        | 1137200  | 2.40E+07 | 16700000 | 22900000 | 6362600  |
| 398140   | 7855300  | 5273700  | 1233700  | 4269300  | 15300000 | 8160200  | 13200000 | 4511500  |
| 0        | 5904600  | 0        | 0        | 1287200  | 13600000 | 15600000 | 8271800  | 5936100  |
| 794110   | 1978200  | 0        | 249600   | 1026500  | 25700000 | 17900000 | 20700000 | 6460400  |
| 0        | 3162100  | 0        | 0        | 2323200  | 48700000 | 48200000 | 57200000 | 9369600  |
| 0        | 1020900  | 0        | 0        | 398660   | 32600000 | 2.30E+07 | 13400000 | 6279200  |
| 0        | 5170000  | 0        | 0        | 2676900  | 13700000 | 16800000 | 21200000 | 4380700  |
| 9738900  | 30200000 | 0        | 3055900  | 0        | 4.24E+08 | 2.88E+08 | 3.87E+08 | 1.10E+08 |
| 0        | 0        | 0        | 0        | 0        | 35200000 | 28900000 | 32600000 | 7338700  |
| 0        | 2806700  | 0        | 0        | 0        | 21400000 | 24100000 | 23500000 | 2857800  |
| 5592400  | 9453500  | 4828700  | 1324700  | 3711100  | 8077900  | 0        | 4348700  | 0        |

|          |          |          |          |          |          |          |          |          |
|----------|----------|----------|----------|----------|----------|----------|----------|----------|
| 0        | 3546000  | 0        | 0        | 2233000  | 30600000 | 17400000 | 33300000 | 10900000 |
| 0        | 8691400  | 0        | 0        | 2858800  | 48800000 | 52600000 | 63300000 | 16200000 |
| 0        | 0        | 0        | 0        | 2931200  | 53100000 | 38200000 | 44100000 | 11300000 |
| 47800000 | 1.20E+08 | 7695100  | 15100000 | 32900000 | 0        | 0        | 3831400  | 0        |
| 0        | 0        | 0        | 0        | 754060   | 49100000 | 27800000 | 62100000 | 9772500  |
| 3356900  | 3013600  | 2413300  | 806540   | 1814300  | 15200000 | 11600000 | 17800000 | 6732500  |
| 0        | 933350   | 225380   | 0        | 2591200  | 4987800  | 0        | 6047600  | 1184700  |
| 0        | 6515000  | 815960   | 856610   | 3555700  | 1.36E+08 | 74700000 | 92200000 | 24900000 |
| 0        | 1950600  | 0        | 0        | 1432200  | 42800000 | 32300000 | 35900000 | 1.50E+07 |
| 0        | 165830   | 0        | 0        | 0        | 17600000 | 10700000 | 14600000 | 2796500  |
| 0        | 0        | 0        | 0        | 404960   | 18900000 | 7461300  | 1.20E+07 | 4074800  |
| 667160   | 15400000 | 0        | 0        | 0        | 30700000 | 19400000 | 31900000 | 9259700  |
| 0        | 0        | 0        | 0        | 0        | 0        | 0        | 0        | 0        |
| 1.01E+08 | 73900000 | 42700000 | 29800000 | 27700000 | 1.50E+08 | 68300000 | 1.05E+08 | 34900000 |
| 2713400  | 2.40E+07 | 10400000 | 5872400  | 1.60E+07 | 19100000 | 4710300  | 11800000 | 5289100  |
| 811530   | 3700900  | 778490   | 340570   | 1729400  | 26400000 | 19200000 | 15700000 | 2878800  |
| 0        | 837720   | 0        | 0        | 0        | 41700000 | 22900000 | 22700000 | 6817500  |
| 0        | 0        | 0        | 0        | 0        | 20800000 | 21700000 | 2.00E+07 | 6361200  |
| 2394200  | 0        | 0        | 1677000  | 0        | 43600000 | 44800000 | 29800000 | 11800000 |
| 0        | 3488500  | 0        | 0        | 2351700  | 1.36E+08 | 80300000 | 1.15E+08 | 31700000 |
| 0        | 2177900  | 0        | 0        | 842170   | 97500000 | 1.21E+08 | 98300000 | 35800000 |
| 12600000 | 21800000 | 462490   | 0        | 7779800  | 1.33E+08 | 1.13E+08 | 1.13E+08 | 34700000 |
| 2.64E+09 | 1.16E+09 | 3.62E+08 | 6.76E+08 | 4.45E+08 | 2.00E+08 | 2.25E+08 | 4.75E+08 | 75200000 |
| 0        | 0        | 0        | 0        | 0        | 98900000 | 91100000 | 99900000 | 7943700  |
| 0        | 2109900  | 691350   | 0        | 1613500  | 55600000 | 5.50E+07 | 70100000 | 11800000 |
| 0        | 0        | 0        | 0        | 2347500  | 42200000 | 13500000 | 27500000 | 8678100  |
| 4647100  | 3602900  | 3183300  | 1570800  | 3360300  | 11900000 | 0        | 3173000  | 0        |
| 0        | 4496800  | 0        | 0        | 1614700  | 18700000 | 10200000 | 12300000 | 10400000 |
| 0        | 0        | 0        | 0        | 0        | 18700000 | 16900000 | 33400000 | 8372800  |
| 0        | 10400000 | 0        | 0        | 0        | 3981800  | 0        | 0        | 0        |
| 77900000 | 56600000 | 21500000 | 14900000 | 1.70E+07 | 3.70E+07 | 9364600  | 13800000 | 3766900  |
| 0        | 1575800  | 0        | 0        | 436500   | 38400000 | 21600000 | 32300000 | 14200000 |
| 0        | 0        | 0        | 0        | 0        | 0        | 0        | 0        | 0        |
| 0        | 0        | 0        | 0        | 0        | 7094800  | 0        | 0        | 0        |
| 2720000  | 10700000 | 3740400  | 683440   | 2625800  | 22500000 | 12700000 | 6370100  | 2043500  |
| 1975200  | 1606500  | 1616500  | 461890   | 980150   | 63800000 | 32200000 | 45100000 | 11300000 |
| 3843300  | 7625400  | 2251700  | 1273500  | 3581000  | 36800000 | 25100000 | 29800000 | 7142800  |
| 5241500  | 0        | 2588100  | 1441400  | 1064500  | 29900000 | 23700000 | 22800000 | 7611900  |
| 1812500  | 268660   | 1188900  | 635490   | 2649400  | 1049100  | 2370100  | 980220   | 1769100  |
| 37100000 | 0        | 0        | 0        | 0        | 19600000 | 10800000 | 1.60E+07 | 2103000  |
| 18700000 | 8557500  | 2660100  | 1573600  | 952970   | 98700000 | 80300000 | 72100000 | 23800000 |
| 0        | 0        | 0        | 0        | 0        | 30200000 | 19400000 | 23900000 | 2457100  |
| 0        | 0        | 0        | 0        | 0        | 87500000 | 4.90E+07 | 52600000 | 20600000 |
| 0        | 8615300  | 0        | 1252500  | 3684000  | 18900000 | 13100000 | 15800000 | 1109600  |
| 0        | 0        | 0        | 0        | 0        | 4356000  | 0        | 0        | 0        |
| 0        | 2480900  | 0        | 0        | 5496000  | 62700000 | 46500000 | 54300000 | 20700000 |
| 0        | 0        | 0        | 0        | 0        | 30500000 | 8257600  | 23600000 | 8266800  |

|          |          |          |          |          |          |          |          |          |
|----------|----------|----------|----------|----------|----------|----------|----------|----------|
| 0        | 0        | 354210   | 0        | 421790   | 6236000  | 1984300  | 4558100  | 939790   |
| 0        | 0        | 0        | 0        | 501270   | 30300000 | 12700000 | 20500000 | 8084200  |
| 3916000  | 8797800  | 796880   | 0        | 527210   | 0        | 0        | 0        | 0        |
| 0        | 54300000 | 0        | 0        | 0        | 10100000 | 7430600  | 11400000 | 2158200  |
| 1.20E+07 | 14200000 | 4481800  | 2484200  | 4806500  | 11800000 | 7840600  | 1.10E+08 | 2285300  |
| 0        | 823760   | 0        | 0        | 520320   | 13200000 | 9955100  | 1.20E+07 | 3675700  |
| 2780500  | 2001200  | 2056600  | 0        | 859150   | 0        | 1493700  | 0        | 0        |
| 0        | 0        | 0        | 0        | 0        | 0        | 0        | 0        | 0        |
| 4489300  | 11500000 | 5964400  | 871590   | 4804800  | 0        | 6218400  | 3670100  | 0        |
| 1.01E+09 | 9.84E+08 | 3.39E+08 | 1.74E+08 | 6.93E+08 | 6.86E+09 | 4.97E+09 | 5.84E+09 | 8.72E+08 |
| 0        | 0        | 0        | 0        | 0        | 47100000 | 3.90E+07 | 46700000 | 11500000 |
| 0        | 0        | 0        | 0        | 0        | 10300000 | 2136800  | 5444400  | 2907000  |
| 0        | 0        | 0        | 0        | 0        | 43700000 | 3230000  | 7075700  | 1010900  |
| 0        | 0        | 0        | 0        | 0        | 13300000 | 9566500  | 28900000 | 4345700  |
| 0        | 0        | 0        | 0        | 0        | 10200000 | 12600000 | 8864000  | 5304300  |
| 1992700  | 3069100  | 938790   | 375070   | 3105000  | 24900000 | 12100000 | 2.50E+07 | 5078300  |
| 0        | 0        | 0        | 0        | 1171000  | 0        | 6195200  | 7333900  | 0        |
| 0        | 1000900  | 0        | 0        | 745400   | 9732800  | 5507200  | 12300000 | 2413500  |
| 0        | 633700   | 0        | 0        | 0        | 2.10E+07 | 12200000 | 16500000 | 7069900  |
| 0        | 0        | 327310   | 0        | 603620   | 10500000 | 11500000 | 9275200  | 4214000  |
| 0        | 0        | 0        | 0        | 328070   | 8282900  | 1212000  | 6795800  | 1781200  |
| 1858600  | 337610   | 190520   | 0        | 240420   | 6591500  | 585420   | 5860900  | 2689600  |
| 0        | 0        | 0        | 0        | 0        | 1.80E+07 | 11800000 | 1.30E+07 | 3595300  |
| 0        | 0        | 0        | 0        | 0        | 0        | 1305200  | 1868300  | 4533200  |
| 0        | 0        | 0        | 0        | 659040   | 2804700  | 3970600  | 5716200  | 4098100  |
| 60300000 | 35500000 | 12400000 | 12400000 | 16600000 | 76900000 | 99900000 | 1.17E+08 | 27100000 |
| 0        | 2202500  | 0        | 0        | 0        | 11400000 | 15200000 | 19200000 | 3916400  |
| 0        | 2429200  | 0        | 0        | 954620   | 2.20E+07 | 9730100  | 1.50E+07 | 0        |
| 0        | 253800   | 0        | 0        | 193470   | 18300000 | 14500000 | 3744300  | 4459900  |
| 0        | 0        | 0        | 0        | 0        | 6041400  | 5356500  | 2526600  | 1241700  |
| 0        | 0        | 0        | 0        | 0        | 0        | 0        | 6088700  | 0        |
| 0        | 8086900  | 3884400  | 338830   | 5122100  | 5387800  | 21100000 | 5927600  | 0        |
| 0        | 0        | 0        | 0        | 0        | 38900000 | 13600000 | 24600000 | 2309700  |
| 0        | 701060   | 0        | 0        | 483320   | 12700000 | 6827700  | 10400000 | 5943600  |
| 0        | 1923000  | 0        | 0        | 496020   | 9730700  | 8168300  | 8375100  | 1819500  |
| 0        | 0        | 0        | 0        | 0        | 12100000 | 1669400  | 11600000 | 2918400  |
| 0        | 0        | 0        | 0        | 0        | 18500000 | 8152000  | 12200000 | 4409100  |
| 1402200  | 2392600  | 2223900  | 386400   | 2120500  | 0        | 0        | 0        | 0        |
| 0        | 0        | 0        | 0        | 0        | 0        | 0        | 447990   | 0        |
| 6099900  | 5227700  | 3596600  | 1624500  | 5853600  | 12400000 | 8634200  | 8947100  | 2925700  |
| 0        | 0        | 0        | 0        | 0        | 8650800  | 10800000 | 10600000 | 2896300  |
| 1537400  | 3385500  | 2343700  | 805250   | 1806400  | 6644900  | 4090300  | 5410100  | 4203500  |
| 0        | 0        | 0        | 7598900  | 0        | 12200000 | 13100000 | 13500000 | 2242500  |
| 0        | 8234300  | 1481500  | 0        | 1720000  | 0        | 0        | 0        | 0        |
| 1524700  | 6881100  | 2530700  | 352280   | 3679000  | 7109100  | 2589000  | 11400000 | 1729500  |
| 0        | 2529400  | 0        | 0        | 0        | 27500000 | 20800000 | 12700000 | 4486500  |
| 2298100  | 2627000  | 554680   | 434620   | 2726000  | 10600000 | 7430100  | 10300000 | 2768900  |

|          |          |          |          |          |          |          |          |          |
|----------|----------|----------|----------|----------|----------|----------|----------|----------|
| 0        | 0        | 0        | 0        | 838650   | 2.20E+07 | 28100000 | 39500000 | 7197200  |
| 3071300  | 13100000 | 1413500  | 1072100  | 6695700  | 80400000 | 41700000 | 54400000 | 17800000 |
| 0        | 0        | 0        | 0        | 1016500  | 39200000 | 19400000 | 38400000 | 11900000 |
| 0        | 0        | 0        | 0        | 0        | 548140   | 0        | 228390   | 1516900  |
| 0        | 6356200  | 0        | 1391200  | 3787200  | 8532000  | 15200000 | 11900000 | 1405900  |
| 586780   | 0        | 0        | 0        | 1222800  | 0        | 0        | 0        | 0        |
| 0        | 1555000  | 0        | 0        | 797730   | 1.40E+07 | 10100000 | 1.40E+07 | 4118900  |
| 0        | 0        | 0        | 0        | 0        | 2891700  | 1827200  | 4103100  | 849000   |
| 0        | 0        | 0        | 0        | 0        | 20700000 | 12900000 | 8315700  | 3046400  |
| 0        | 0        | 0        | 0        | 0        | 17600000 | 7540600  | 9205800  | 4345300  |
| 77500000 | 0        | 1607300  | 19200000 | 1256100  | 12900000 | 5551400  | 12900000 | 0        |
| 0        | 0        | 0        | 0        | 0        | 11700000 | 1.30E+07 | 17800000 | 3391000  |
| 8347300  | 9149400  | 0        | 1610700  | 5492400  | 0        | 0        | 0        | 0        |
| 0        | 1008400  | 0        | 0        | 0        | 3534400  | 8328300  | 14800000 | 0        |
| 0        | 0        | 0        | 3233600  | 802610   | 2362500  | 3492400  | 6973700  | 2915400  |
| 0        | 0        | 0        | 0        | 2042200  | 0        | 0        | 0        | 0        |
| 0        | 0        | 0        | 0        | 0        | 750170   | 328800   | 737690   | 0        |
| 0        | 0        | 0        | 0        | 0        | 14600000 | 9111400  | 7630400  | 5567100  |
| 0        | 816030   | 0        | 0        | 0        | 13700000 | 13600000 | 11300000 | 735370   |
| 0        | 0        | 0        | 0        | 0        | 13200000 | 17900000 | 7794400  | 6310900  |
| 0        | 0        | 0        | 0        | 0        | 3192800  | 1.00E+07 | 3680000  | 1269800  |
| 0        | 0        | 0        | 0        | 0        | 39400000 | 1.50E+07 | 1.90E+07 | 8457100  |
| 5489100  | 8133800  | 2770700  | 2162100  | 3661100  | 42900000 | 25500000 | 33700000 | 8190800  |
| 0        | 0        | 0        | 0        | 0        | 14200000 | 12900000 | 12200000 | 1827800  |
| 0        | 0        | 0        | 0        | 0        | 9546100  | 1195700  | 8497200  | 669300   |
| 0        | 1307300  | 0        | 0        | 763600   | 12500000 | 0        | 8079400  | 3216000  |
| 0        | 7366300  | 3917200  | 2038700  | 5952000  | 4946200  | 3346700  | 9268000  | 3017500  |
| 0        | 0        | 0        | 0        | 0        | 24500000 | 8225600  | 4765000  | 7553900  |
| 0        | 0        | 0        | 0        | 0        | 16300000 | 16700000 | 10500000 | 1120600  |
| 0        | 0        | 0        | 0        | 0        | 14100000 | 17200000 | 23700000 | 4499400  |
| 0        | 0        | 0        | 0        | 0        | 53100000 | 28200000 | 35300000 | 9431700  |
| 0        | 12600000 | 0        | 0        | 0        | 36600000 | 12200000 | 27500000 | 3134200  |
| 0        | 4925400  | 0        | 0        | 1871300  | 7999600  | 12200000 | 11900000 | 4401800  |
| 0        | 0        | 0        | 0        | 1678100  | 9671100  | 3861500  | 1451300  | 185640   |
| 0        | 0        | 0        | 0        | 0        | 3363200  | 3198500  | 0        | 1464100  |
| 0        | 0        | 0        | 0        | 1669100  | 49200000 | 23500000 | 32500000 | 13700000 |
| 0        | 0        | 0        | 0        | 1896700  | 0        | 0        | 0        | 0        |
| 0        | 0        | 0        | 0        | 0        | 7591600  | 1422200  | 3779200  | 1673900  |
| 3071300  | 6337200  | 1413500  | 1072100  | 2574900  | 51800000 | 29300000 | 37200000 | 10500000 |
| 86500000 | 46700000 | 29100000 | 47400000 | 22300000 | 41700000 | 24300000 | 31200000 | 35700000 |
| 0        | 0        | 0        | 0        | 0        | 10100000 | 3005800  | 2836800  | 1132900  |
| 0        | 0        | 0        | 0        | 0        | 14300000 | 10900000 | 12900000 | 4121000  |
| 0        | 6460100  | 0        | 0        | 0        | 1.22E+08 | 93200000 | 1.01E+08 | 24200000 |
| 0        | 0        | 0        | 0        | 0        | 20900000 | 2.80E+07 | 35300000 | 14800000 |
| 6590000  | 5405600  | 2594100  | 0        | 2233000  | 0        | 0        | 0        | 0        |
| 0        | 0        | 0        | 0        | 0        | 0        | 773220   | 0        | 0        |
| 0        | 1933600  | 874400   | 0        | 820690   | 17200000 | 8573700  | 4684700  | 1605100  |



|          |          |         |         |         |          |          |          |         |
|----------|----------|---------|---------|---------|----------|----------|----------|---------|
| 0        | 1608100  | 0       | 0       | 0       | 13200000 | 1.20E+07 | 13600000 | 2522700 |
| 0        | 0        | 0       | 0       | 745340  | 4318800  | 5308900  | 7333400  | 2263100 |
| 0        | 0        | 0       | 0       | 702370  | 16500000 | 11600000 | 8752800  | 3208500 |
| 0        | 0        | 0       | 0       | 4448000 | 3683900  | 2569200  | 3110800  | 850910  |
| 0        | 0        | 0       | 0       | 0       | 30600000 | 15300000 | 29800000 | 7227800 |
| 0        | 0        | 0       | 0       | 0       | 10600000 | 2225700  | 17300000 | 3307000 |
| 0        | 2659900  | 693740  | 0       | 1856700 | 6924700  | 4166000  | 8279800  | 1797800 |
| 0        | 575570   | 188640  | 0       | 0       | 0        | 7274200  | 6007200  | 980350  |
| 0        | 0        | 0       | 0       | 0       | 0        | 0        | 0        | 0       |
| 0        | 0        | 0       | 0       | 0       | 1571300  | 2043100  | 5231400  | 0       |
| 0        | 0        | 0       | 0       | 1098900 | 0        | 0        | 0        | 0       |
| 0        | 0        | 0       | 0       | 0       | 7256100  | 16200000 | 12300000 | 2028900 |
| 0        | 0        | 0       | 0       | 0       | 1.40E+07 | 4523200  | 14600000 | 4647500 |
| 0        | 0        | 0       | 0       | 0       | 0        | 3033900  | 3130300  | 1131700 |
| 0        | 0        | 0       | 0       | 0       | 0        | 0        | 0        | 1764700 |
| 9632200  | 11400000 | 5142100 | 2866300 | 868320  | 0        | 0        | 0        | 993820  |
| 0        | 0        | 0       | 0       | 0       | 12400000 | 10700000 | 25900000 | 7043000 |
| 0        | 0        | 0       | 0       | 0       | 0        | 0        | 0        | 1459200 |
| 0        | 3376400  | 0       | 0       | 2207900 | 8026900  | 18800000 | 5151500  | 3626400 |
| 0        | 0        | 0       | 0       | 0       | 0        | 0        | 0        | 0       |
| 0        | 0        | 0       | 370360  | 644110  | 15600000 | 13300000 | 12500000 | 2599200 |
| 17900000 | 6442900  | 9214500 | 3763400 | 5700900 | 0        | 0        | 0        | 0       |
| 0        | 0        | 0       | 0       | 0       | 4011700  | 444070   | 1802100  | 1984100 |
| 0        | 0        | 0       | 0       | 0       | 0        | 0        | 0        | 0       |
| 0        | 0        | 0       | 0       | 0       | 9484100  | 3744100  | 2882700  | 2611600 |
| 0        | 0        | 0       | 0       | 631870  | 13300000 | 956470   | 3540700  | 1335300 |
| 26100000 | 10200000 | 5119100 | 2819500 | 5937100 | 2417600  | 2437800  | 11300000 | 0       |
| 714860   | 1415900  | 0       | 0       | 612510  | 3637200  | 837440   | 3913400  | 954130  |
| 0        | 1306800  | 0       | 0       | 341720  | 2693900  | 1358700  | 1565200  | 613190  |
| 0        | 1416700  | 0       | 0       | 467450  | 0        | 8967100  | 4818000  | 2965700 |
| 0        | 0        | 0       | 0       | 0       | 10800000 | 17600000 | 5621000  | 1064200 |
| 0        | 0        | 0       | 0       | 0       | 0        | 543810   | 621810   | 264780  |
| 0        | 0        | 0       | 0       | 0       | 0        | 2120800  | 0        | 0       |
| 0        | 0        | 0       | 546410  | 424160  | 0        | 0        | 0        | 0       |
| 0        | 0        | 0       | 0       | 0       | 5403800  | 9025800  | 9678500  | 0       |
| 0        | 0        | 0       | 0       | 0       | 40100000 | 0        | 0        | 0       |
| 0        | 0        | 0       | 0       | 0       | 1850300  | 0        | 1795100  | 0       |
| 0        | 4635300  | 0       | 0       | 0       | 8271100  | 0        | 0        | 0       |
| 0        | 0        | 0       | 0       | 0       | 3668100  | 0        | 0        | 0       |
| 0        | 0        | 0       | 0       | 0       | 1375200  | 0        | 0        | 0       |
| 0        | 997150   | 0       | 0       | 0       | 0        | 316600   | 0        | 0       |
| 0        | 0        | 0       | 0       | 0       | 6573900  | 0        | 8540600  | 3644900 |
| 0        | 0        | 0       | 0       | 0       | 12900000 | 5030900  | 5312800  | 0       |
| 0        | 0        | 0       | 0       | 392250  | 11200000 | 6368400  | 9981500  | 1369200 |
| 0        | 0        | 0       | 0       | 0       | 0        | 0        | 0        | 0       |
| 0        | 0        | 0       | 0       | 0       | 4195900  | 1688100  | 2895400  | 1114300 |
| 0        | 0        | 0       | 0       | 0       | 0        | 1911200  | 1809100  | 0       |

|          |         |         |         |         |          |          |          |          |
|----------|---------|---------|---------|---------|----------|----------|----------|----------|
| 0        | 0       | 1130500 | 0       | 1293400 | 8858300  | 16400000 | 2481800  | 775710   |
| 0        | 0       | 0       | 0       | 0       | 1243300  | 1092400  | 920370   | 299080   |
| 0        | 0       | 0       | 0       | 0       | 1650400  | 977110   | 1342000  | 281150   |
| 0        | 2172000 | 2585600 | 0       | 0       | 0        | 2701900  | 5351400  | 2662200  |
| 0        | 0       | 0       | 0       | 0       | 5608000  | 0        | 1713500  | 0        |
| 0        | 0       | 0       | 0       | 402950  | 8911700  | 2552600  | 7303400  | 1743400  |
| 4634000  | 0       | 0       | 1168300 | 0       | 15700000 | 4237900  | 13700000 | 6307400  |
| 0        | 0       | 0       | 0       | 0       | 0        | 6965700  | 7946900  | 1982400  |
| 0        | 0       | 0       | 0       | 0       | 0        | 0        | 0        | 0        |
| 0        | 489470  | 0       | 0       | 265460  | 1200100  | 680350   | 891580   | 254730   |
| 593200   | 1350900 | 0       | 0       | 309240  | 7980200  | 4238900  | 6409200  | 1394800  |
| 0        | 0       | 0       | 0       | 0       | 1975400  | 4103100  | 6424600  | 0        |
| 0        | 0       | 0       | 0       | 0       | 0        | 0        | 0        | 0        |
| 0        | 0       | 0       | 0       | 0       | 0        | 0        | 0        | 0        |
| 0        | 1407800 | 0       | 0       | 1321600 | 0        | 0        | 17900000 | 4186900  |
| 0        | 0       | 0       | 0       | 0       | 8829600  | 8172700  | 4835100  | 0        |
| 0        | 0       | 0       | 0       | 0       | 6460000  | 2098800  | 6957000  | 701920   |
| 0        | 0       | 0       | 0       | 0       | 19700000 | 8920800  | 9369900  | 1146700  |
| 0        | 2000900 | 0       | 0       | 0       | 0        | 0        | 0        | 0        |
| 6233100  | 1455000 | 0       | 0       | 0       | 0        | 0        | 0        | 0        |
| 0        | 0       | 0       | 0       | 0       | 1.70E+07 | 7572200  | 0        | 4373000  |
| 0        | 0       | 0       | 0       | 0       | 0        | 0        | 0        | 0        |
| 0        | 0       | 0       | 0       | 0       | 0        | 0        | 2033400  | 0        |
| 0        | 0       | 1223300 | 1146100 | 0       | 0        | 0        | 0        | 2638500  |
| 0        | 0       | 1157500 | 242050  | 551190  | 0        | 0        | 0        | 0        |
| 0        | 0       | 0       | 0       | 0       | 5432500  | 3366200  | 5111600  | 1506200  |
| 0        | 0       | 0       | 0       | 0       | 5355800  | 6082600  | 4488800  | 4499300  |
| 0        | 0       | 0       | 0       | 0       | 15300000 | 7234800  | 48800000 | 13400000 |
| 0        | 0       | 0       | 0       | 0       | 0        | 2053000  | 0        | 0        |
| 0        | 0       | 0       | 0       | 0       | 14600000 | 10700000 | 13800000 | 2752700  |
| 0        | 219060  | 0       | 0       | 0       | 349350   | 306320   | 416900   | 0        |
| 0        | 0       | 0       | 0       | 0       | 9066200  | 5590300  | 7529000  | 228420   |
| 0        | 0       | 0       | 0       | 0       | 19800000 | 9033700  | 3491700  | 2713000  |
| 0        | 558880  | 653270  | 0       | 550570  | 0        | 0        | 0        | 0        |
| 0        | 0       | 0       | 0       | 0       | 0        | 6611300  | 3277200  | 0        |
| 0        | 0       | 0       | 0       | 0       | 0        | 0        | 13500000 | 0        |
| 12600000 | 3682700 | 0       | 0       | 0       | 72600000 | 63700000 | 54600000 | 18700000 |
| 0        | 0       | 0       | 0       | 0       | 0        | 0        | 0        | 0        |
| 0        | 0       | 0       | 0       | 0       | 0        | 0        | 0        | 0        |
| 0        | 2061100 | 0       | 596540  | 0       | 34100000 | 22500000 | 39100000 | 9384200  |
| 0        | 0       | 0       | 0       | 1829700 | 0        | 0        | 0        | 0        |
| 0        | 0       | 0       | 0       | 0       | 23600000 | 0        | 4738000  | 1482000  |
| 0        | 790840  | 0       | 0       | 2030400 | 27900000 | 16900000 | 28600000 | 8547600  |
| 0        | 0       | 0       | 0       | 0       | 7750500  | 5022100  | 5171800  | 1112300  |
| 0        | 0       | 2444200 | 775390  | 2640600 | 11500000 | 2567200  | 2369700  | 3633900  |
| 0        | 0       | 0       | 0       | 0       | 3995900  | 1680800  | 3626300  | 1811700  |
| 0        | 0       | 0       | 0       | 0       | 973930   | 1874500  | 5763900  | 1145400  |



|          |          |          |          |          |          |          |          |         |
|----------|----------|----------|----------|----------|----------|----------|----------|---------|
| 0        | 0        | 0        | 0        | 0        | 0        | 0        | 0        | 0       |
| 0        | 0        | 0        | 0        | 0        | 0        | 0        | 0        | 0       |
| 0        | 0        | 0        | 0        | 0        | 18400000 | 8317000  | 10700000 | 1223300 |
| 0        | 0        | 0        | 0        | 0        | 296580   | 0        | 261950   | 0       |
| 0        | 931850   | 9291700  | 0        | 0        | 4058900  | 2087700  | 8097200  | 927240  |
| 0        | 2550800  | 0        | 0        | 0        | 0        | 4947700  | 3998800  | 1152600 |
| 0        | 0        | 0        | 0        | 0        | 1209700  | 813360   | 8480700  | 1705000 |
| 0        | 0        | 0        | 0        | 308270   | 0        | 1754600  | 1710800  | 0       |
| 0        | 0        | 0        | 0        | 0        | 0        | 12200000 | 0        | 0       |
| 0        | 0        | 0        | 0        | 0        | 1982000  | 0        | 1261400  | 458190  |
| 0        | 0        | 0        | 0        | 0        | 3095000  | 2457400  | 5356500  | 1389600 |
| 0        | 5611700  | 0        | 0        | 0        | 0        | 0        | 0        | 0       |
| 0        | 0        | 0        | 0        | 0        | 0        | 1188100  | 0        | 0       |
| 0        | 0        | 0        | 0        | 0        | 0        | 0        | 0        | 0       |
| 0        | 1940600  | 3907700  | 0        | 321540   | 0        | 0        | 0        | 0       |
| 0        | 1047900  | 0        | 373430   | 455390   | 0        | 0        | 0        | 0       |
| 1133100  | 1365400  | 0        | 0        | 0        | 3563000  | 2608200  | 3224800  | 0       |
| 0        | 0        | 0        | 0        | 0        | 7714600  | 4995500  | 10800000 | 4752000 |
| 0        | 0        | 0        | 0        | 0        | 14400000 | 0        | 0        | 0       |
| 0        | 0        | 0        | 0        | 0        | 3998900  | 1776300  | 0        | 2012100 |
| 0        | 0        | 0        | 0        | 0        | 0        | 0        | 0        | 0       |
| 0        | 0        | 0        | 0        | 0        | 0        | 1315800  | 0        | 1533400 |
| 0        | 0        | 0        | 0        | 0        | 0        | 0        | 3806700  | 0       |
| 0        | 0        | 0        | 0        | 973680   | 11500000 | 7683200  | 2153100  | 1747700 |
| 0        | 0        | 0        | 0        | 0        | 1.50E+07 | 1.30E+07 | 12100000 | 1993500 |
| 0        | 0        | 0        | 0        | 0        | 2713700  | 0        | 0        | 0       |
| 0        | 0        | 0        | 0        | 0        | 24800000 | 1336500  | 15900000 | 7911100 |
| 0        | 0        | 0        | 0        | 0        | 0        | 0        | 2264300  | 1375800 |
| 79200000 | 43700000 | 37200000 | 23800000 | 29600000 | 25500000 | 18700000 | 12600000 | 4113400 |
| 0        | 0        | 0        | 0        | 0        | 12800000 | 8160000  | 20500000 | 6198800 |
| 0        | 0        | 0        | 0        | 0        | 0        | 0        | 0        | 0       |
| 0        | 0        | 0        | 0        | 0        | 6945800  | 3484000  | 4327700  | 0       |
| 0        | 0        | 0        | 0        | 0        | 3448000  | 12500000 | 15300000 | 1060700 |
| 0        | 0        | 0        | 0        | 0        | 15900000 | 11900000 | 13800000 | 2708800 |
| 0        | 1319500  | 0        | 0        | 0        | 0        | 0        | 0        | 2932500 |
| 0        | 0        | 0        | 0        | 1258300  | 2661700  | 0        | 0        | 976270  |
| 0        | 0        | 0        | 0        | 0        | 401040   | 2550700  | 377540   | 2873400 |
| 0        | 0        | 0        | 0        | 0        | 0        | 0        | 0        | 0       |
| 0        | 0        | 0        | 0        | 0        | 0        | 0        | 0        | 0       |
| 0        | 0        | 0        | 0        | 0        | 2114500  | 9497100  | 0        | 192440  |
| 0        | 0        | 0        | 0        | 0        | 476530   | 2244600  | 3839300  | 549160  |
| 0        | 0        | 0        | 0        | 0        | 17700000 | 3461400  | 8339600  | 2885000 |
| 0        | 0        | 0        | 0        | 0        | 10200000 | 0        | 0        | 0       |
| 0        | 837720   | 211470   | 0        | 1210900  | 23900000 | 15200000 | 6724400  | 6077000 |
| 0        | 0        | 0        | 0        | 0        | 4708300  | 3458400  | 0        | 0       |
| 0        | 0        | 0        | 0        | 0        | 0        | 0        | 0        | 0       |
| 0        | 0        | 0        | 0        | 0        | 0        | 2796200  | 2362700  | 1073000 |









|          |          |         |         |          |          |          |          |          |   |
|----------|----------|---------|---------|----------|----------|----------|----------|----------|---|
| 0        | 0        | 0       | 0       | 0        | 0        | 0        | 0        | 0        | 0 |
| 0        | 0        | 0       | 0       | 0        | 0        | 0        | 0        | 0        | 0 |
| 12600000 | 0        | 0       | 0       | 0        | 67300000 | 59100000 | 49700000 | 15600000 |   |
| 0        | 0        | 0       | 0       | 0        | 2870800  | 0        | 0        | 843130   |   |
| 0        | 0        | 0       | 0       | 0        | 0        | 0        | 0        | 0        |   |
| 0        | 0        | 0       | 0       | 0        | 0        | 0        | 0        | 0        |   |
| 0        | 0        | 0       | 0       | 0        | 0        | 0        | 0        | 0        |   |
| 0        | 0        | 0       | 0       | 0        | 0        | 0        | 0        | 0        |   |
| 9242300  | 16200000 | 0       | 0       | 0        | 1.90E+07 | 13700000 | 52200000 | 7991000  |   |
| 0        | 0        | 0       | 0       | 0        | 0        | 0        | 0        | 0        |   |
| 0        | 0        | 0       | 0       | 0        | 0        | 0        | 0        | 0        |   |
| 0        | 0        | 0       | 0       | 359100   | 0        | 0        | 0        | 0        |   |
| 0        | 0        | 0       | 0       | 0        | 0        | 0        | 0        | 0        |   |
| 0        | 0        | 275730  | 0       | 952840   | 0        | 1121300  | 0        | 0        |   |
| 0        | 0        | 0       | 0       | 0        | 0        | 0        | 0        | 0        |   |
| 0        | 0        | 0       | 0       | 0        | 0        | 0        | 0        | 0        |   |
| 0        | 0        | 0       | 0       | 0        | 0        | 0        | 0        | 0        |   |
| 0        | 0        | 0       | 0       | 0        | 0        | 0        | 0        | 0        |   |
| 10600000 | 1.60E+07 | 5589100 | 2699600 | 10100000 | 1.12E+08 | 61600000 | 63500000 | 29800000 |   |
| 0        | 0        | 0       | 0       | 0        | 0        | 0        | 0        | 0        |   |
| 0        | 0        | 0       | 0       | 0        | 0        | 1978100  | 0        | 0        |   |
| 0        | 0        | 0       | 0       | 1016100  | 21600000 | 16400000 | 18100000 | 954720   |   |
| 0        | 0        | 0       | 0       | 0        | 0        | 0        | 0        | 0        |   |
| 0        | 0        | 0       | 0       | 0        | 0        | 0        | 0        | 0        |   |
| 3.47E+08 | 4.61E+08 | NA      | NA      | NA       | 1.18E+09 | 8.24E+08 | 8.79E+08 | NA       |   |
| 1.40E+09 | 1.17E+09 | NA      | NA      | NA       | 2.60E+08 | 1.01E+09 | 2.60E+08 | NA       |   |
| 2.90E+09 | 3.80E+09 | NA      | NA      | NA       | 1.87E+10 | 1.36E+10 | 2.10E+10 | NA       |   |
| 5.36E+08 | 5.99E+08 | NA      | NA      | NA       | 9.17E+08 | 6.59E+08 | 5.91E+08 | NA       |   |
| 30600000 | 9.00E+07 | NA      | NA      | NA       | 5.17E+08 | 3.84E+08 | 5.31E+08 | NA       |   |
| 3.33E+08 | 4.69E+08 | NA      | NA      | NA       | 2.02E+09 | 1.39E+09 | 1.69E+09 | NA       |   |
| 47100000 | 57700000 | NA      | NA      | NA       | 4.97E+08 | 3.36E+08 | 3.84E+08 | NA       |   |
| 2.25E+09 | 1.19E+09 | NA      | NA      | NA       | 1.02E+09 | 5.67E+08 | 7.14E+08 | NA       |   |
| 0        | 6792600  | NA      | NA      | NA       | 1.29E+08 | 97800000 | 1.47E+08 | NA       |   |
| 47300000 | 1.18E+08 | NA      | NA      | NA       | 2.94E+08 | 1.81E+08 | 1.58E+08 | NA       |   |
| 0        | 0        | NA      | NA      | NA       | 0        | 5055400  | 106240   | NA       |   |
| 7249200  | 24900000 | NA      | NA      | NA       | 3.10E+08 | 2.26E+08 | 2.65E+08 | NA       |   |
| 1.01E+08 | 50400000 | NA      | NA      | NA       | 2.98E+08 | 2.01E+08 | 2.19E+08 | NA       |   |
| 93200000 | 1.02E+08 | NA      | NA      | NA       | 1.41E+08 | 2.40E+08 | 3.17E+08 | NA       |   |
| 23500000 | 7441500  | NA      | NA      | NA       | 94700000 | 61400000 | 78200000 | NA       |   |
| 18600000 | 27100000 | NA      | NA      | NA       | 62300000 | 34100000 | 6.00E+07 | NA       |   |
| 19800000 | 54800000 | NA      | NA      | NA       | 2.73E+08 | 2.02E+08 | 2.34E+08 | NA       |   |
| 12300000 | 14800000 | NA      | NA      | NA       | 90700000 | 51100000 | 94500000 | NA       |   |
| 31900000 | 49300000 | NA      | NA      | NA       | 4.74E+08 | 4.76E+08 | 3.11E+08 | NA       |   |
| 6343000  | 19200000 | NA      | NA      | NA       | 60100000 | 45100000 | 66600000 | NA       |   |
| 353930   | 10500000 | NA      | NA      | NA       | 7.00E+07 | 37500000 | 48100000 | NA       |   |
| 36100000 | 50800000 | NA      | NA      | NA       | 99600000 | 1.05E+08 | 98600000 | NA       |   |
| 9189100  | 4.00E+07 | NA      | NA      | NA       | 87600000 | 1.08E+08 | 1.25E+08 | NA       |   |

|          |          |    |    |    |          |          |          |    |
|----------|----------|----|----|----|----------|----------|----------|----|
| 1208700  | 1893900  | NA | NA | NA | 92800000 | 18400000 | 36200000 | NA |
| 1.70E+07 | 24300000 | NA | NA | NA | 1.66E+08 | 1.26E+08 | 1.48E+08 | NA |
| 30100000 | 55300000 | NA | NA | NA | 98100000 | 78200000 | 92300000 | NA |
| 2151800  | 3306200  | NA | NA | NA | 18400000 | 7454100  | 14500000 | NA |
| 2.30E+07 | 0        | NA | NA | NA | 0        | 7321500  | 0        | NA |
| 1162100  | 2558300  | NA | NA | NA | 31800000 | 39900000 | 43700000 | NA |
| 0        | 4006800  | NA | NA | NA | 21700000 | 24800000 | 23300000 | NA |
| 0        | 5571400  | NA | NA | NA | 45500000 | 3.80E+07 | 53700000 | NA |
| 19500000 | 2.00E+07 | NA | NA | NA | 92200000 | 41700000 | 57400000 | NA |
| 2652600  | 0        | NA | NA | NA | 1.92E+08 | 1.66E+08 | 2.13E+08 | NA |
| 882440   | 20700000 | NA | NA | NA | 38500000 | 0        | 0        | NA |
| 0        | 4139900  | NA | NA | NA | 83700000 | 75900000 | 68700000 | NA |
| 0        | 0        | NA | NA | NA | 1.07E+08 | 63100000 | 1.02E+08 | NA |
| 4462400  | 14600000 | NA | NA | NA | 16800000 | 35600000 | 32400000 | NA |
| 0        | 0        | NA | NA | NA | 0        | 2133900  | 0        | NA |
| 3604300  | 15200000 | NA | NA | NA | 2.50E+07 | 15900000 | 22400000 | NA |
| 0        | 0        | NA | NA | NA | 22600000 | 1.40E+07 | 1.40E+07 | NA |
| 7546500  | 9876000  | NA | NA | NA | 37200000 | 18400000 | 27700000 | NA |
| 0        | 0        | NA | NA | NA | 17900000 | 12300000 | 27100000 | NA |
| 0        | 0        | NA | NA | NA | 0        | 0        | 0        | NA |
| 0        | 0        | NA | NA | NA | 3.70E+07 | 29500000 | 25700000 | NA |
| 0        | 2432000  | NA | NA | NA | 3.30E+07 | 2.70E+07 | 78300000 | NA |
| 2448400  | 0        | NA | NA | NA | 52900000 | 38900000 | 49700000 | NA |
| 0        | 2758600  | NA | NA | NA | 18100000 | 27200000 | 18900000 | NA |
| 1.32E+08 | 1.64E+08 | NA | NA | NA | 43600000 | 25900000 | 35500000 | NA |
| 0        | 0        | NA | NA | NA | 22800000 | 2.90E+07 | 36400000 | NA |
| 0        | 0        | NA | NA | NA | 20900000 | 10800000 | 6090500  | NA |
| 0        | 0        | NA | NA | NA | 36300000 | 17100000 | 28900000 | NA |
| 737760   | 1124100  | NA | NA | NA | 20400000 | 23300000 | 24700000 | NA |
| 2020700  | 4573600  | NA | NA | NA | 14200000 | 22300000 | 4446600  | NA |
| 28700000 | 1736500  | NA | NA | NA | 6929300  | 6081500  | 2381300  | NA |
| 3900800  | 4103900  | NA | NA | NA | 48200000 | 3.10E+07 | 39700000 | NA |
| 0        | 0        | NA | NA | NA | 0        | 0        | 0        | NA |
| 0        | 0        | NA | NA | NA | 3067000  | 3448200  | 0        | NA |
| 0        | 0        | NA | NA | NA | 0        | 0        | 0        | NA |
| 0        | 2445500  | NA | NA | NA | 0        | 0        | 1965000  | NA |
| 0        | 0        | NA | NA | NA | 41300000 | 11300000 | 11100000 | NA |
| 0        | 0        | NA | NA | NA | 0        | 0        | 0        | NA |
| 1.11E+09 | 0        | NA | NA | NA | 0        | 0        | 0        | NA |
| 0        | 0        | NA | NA | NA | 32100000 | 6626400  | 9489300  | NA |
| 0        | 0        | NA | NA | NA | 0        | 0        | 0        | NA |
| 0        | 0        | NA | NA | NA | 20700000 | 5964200  | 9879900  | NA |
| 896450   | 608630   | NA | NA | NA | 660590   | 5018300  | 4784900  | NA |
| 5.33E+08 | 6.15E+08 | NA | NA | NA | 1.49E+08 | 1.23E+08 | 2.83E+08 | NA |
| 0        | 0        | NA | NA | NA | 0        | 0        | 0        | NA |
| 40700000 | 763340   | NA | NA | NA | 0        | 1.40E+07 | 22600000 | NA |
| 0        | 0        | NA | NA | NA | 0        | 0        | 3491200  | NA |

|          |          |    |    |    |          |          |          |    |
|----------|----------|----|----|----|----------|----------|----------|----|
| 8464300  | 286300   | NA | NA | NA | 0        | 0        | 0        | NA |
| 0        | 0        | NA | NA | NA | 0        | 0        | 0        | NA |
| 0        | 0        | NA | NA | NA | 2149600  | 1302700  | 1540900  | NA |
| 0        | 0        | NA | NA | NA | 7076500  | 7107100  | 7473400  | NA |
| 3183500  | 5411700  | NA | NA | NA | 1.20E+07 | 7621200  | 9051700  | NA |
| 0        | 0        | NA | NA | NA | 0        | 0        | 0        | NA |
| 0        | 0        | NA | NA | NA | 40400000 | 0        | 35600000 | NA |
| 1784300  | 0        | NA | NA | NA | 0        | 2584800  | 2206800  | NA |
| 0        | 0        | NA | NA | NA | 21900000 | 9163000  | 14100000 | NA |
| 0        | 1026800  | NA | NA | NA | 12500000 | 7918100  | 15700000 | NA |
| 0        | 0        | NA | NA | NA | 11300000 | 3010500  | 2797100  | NA |
| 1634600  | 4369500  | NA | NA | NA | 0        | 0        | 0        | NA |
| 0        | 0        | NA | NA | NA | 0        | 0        | 0        | NA |
| 0        | 0        | NA | NA | NA | 16900000 | 6327600  | 11900000 | NA |
| 0        | 0        | NA | NA | NA | 17600000 | 9970300  | 8778300  | NA |
| 0        | 0        | NA | NA | NA | 0        | 0        | 0        | NA |
| 0        | 646250   | NA | NA | NA | 10100000 | 6642000  | 7202100  | NA |
| 0        | 0        | NA | NA | NA | 2703600  | 6060200  | 8536800  | NA |
| 0        | 1333900  | NA | NA | NA | 6195100  | 5814200  | 6239800  | NA |
| 0        | 612710   | NA | NA | NA | 5103800  | 3569800  | 4150300  | NA |
| 0        | 0        | NA | NA | NA | 24700000 | 3458200  | 16900000 | NA |
| 0        | 0        | NA | NA | NA | 0        | 202330   | 486120   | NA |
| 0        | 2.48E+08 | NA | NA | NA | 0        | 11400000 | 0        | NA |
| 0        | 0        | NA | NA | NA | 0        | 0        | 0        | NA |
| 0        | 0        | NA | NA | NA | 0        | 0        | 0        | NA |
| 0        | 0        | NA | NA | NA | 0        | 0        | 4015000  | NA |
| 0        | 0        | NA | NA | NA | 4571600  | 0        | 8148700  | NA |
| 0        | 0        | NA | NA | NA | 16400000 | 12600000 | 24300000 | NA |
| 5.33E+08 | 3.77E+08 | NA | NA | NA | 0        | 0        | 0        | NA |
| 0        | 0        | NA | NA | NA | 811330   | 0        | 0        | NA |
| 0        | 0        | NA | NA | NA | 9899500  | 10800000 | 17800000 | NA |
| 0        | 0        | NA | NA | NA | 4922400  | 5716100  | 4198800  | NA |
| 0        | 0        | NA | NA | NA | 5869800  | 3082400  | 4999500  | NA |
| 0        | 0        | NA | NA | NA | 3.30E+07 | 8974300  | 24800000 | NA |
| 0        | 0        | NA | NA | NA | 8952700  | 0        | 9511200  | NA |
| 0        | 0        | NA | NA | NA | 0        | 0        | 5191200  | NA |
| 0        | 0        | NA | NA | NA | 0        | 2843900  | 9909400  | NA |
| 0        | 0        | NA | NA | NA | 0        | 321340   | 0        | NA |
| 0        | 0        | NA | NA | NA | 0        | 11400000 | 18400000 | NA |
| 0        | 0        | NA | NA | NA | 361560   | 0        | 327940   | NA |
| 0        | 0        | NA | NA | NA | 0        | 0        | 0        | NA |
| 0        | 0        | NA | NA | NA | 0        | 0        | 0        | NA |
| 0        | 0        | NA | NA | NA | 21200000 | 0        | 10400000 | NA |
| 0        | 0        | NA | NA | NA | 15400000 | 4038500  | 13300000 | NA |
| 0        | 0        | NA | NA | NA | 0        | 3661200  | 4343900  | NA |
| 0        | 0        | NA | NA | NA | 0        | 0        | 0        | NA |
| 0        | 0        | NA | NA | NA | 0        | 0        | 0        | NA |



|          |             |    |    |          |          |             |
|----------|-------------|----|----|----------|----------|-------------|
| 0        | 0 NA        | NA | NA | 0        | 0        | 0 NA        |
| 0        | 1398700 NA  | NA | NA | 0        | 0        | 0 NA        |
| 0        | 3355800 NA  | NA | NA | 2331600  | 1961900  | 0 NA        |
| 0        | 0 NA        | NA | NA | 8894000  | 1.70E+07 | 6983800 NA  |
| 0        | 0 NA        | NA | NA | 4949800  | 0        | 4022200 NA  |
| 0        | 0 NA        | NA | NA | 0        | 0        | 0 NA        |
| 4116600  | 4663400 NA  | NA | NA | 0        | 0        | 0 NA        |
| 0        | 0 NA        | NA | NA | 10600000 | 6776800  | 4493300 NA  |
| 0        | 0 NA        | NA | NA | 5771500  | 0        | 0 NA        |
| 0        | 0 NA        | NA | NA | 0        | 0        | 0 NA        |
| 0        | 0 NA        | NA | NA | 37100000 | 23600000 | 29900000 NA |
| 25200000 | 21100000 NA | NA | NA | 2.50E+07 | 14800000 | 19200000 NA |
| 0        | 330940 NA   | NA | NA | 523110   | 353500   | 537610 NA   |
| 0        | 0 NA        | NA | NA | 8336900  | 633740   | 4657100 NA  |
| 0        | 147260 NA   | NA | NA | 11600000 | 4634400  | 8106300 NA  |
| 749050   | 753700 NA   | NA | NA | 0        | 0        | 0 NA        |
| 0        | 1459100 NA  | NA | NA | 4103500  | 3423400  | 4552500 NA  |
| 0        | 0 NA        | NA | NA | 3865100  | 639790   | 0 NA        |
| 0        | 0 NA        | NA | NA | 3633700  | 10100000 | 3827100 NA  |
| 0        | 1.40E+07 NA | NA | NA | 0        | 0        | 0 NA        |
| 0        | 0 NA        | NA | NA | 0        | 0        | 0 NA        |
| 0        | 0 NA        | NA | NA | 0        | 0        | 0 NA        |
| 0        | 428140 NA   | NA | NA | 3963200  | 514400   | 0 NA        |
| 50500000 | 85800000 NA | NA | NA | 1.47E+08 | 97500000 | 1.07E+08 NA |
| 0        | 0 NA        | NA | NA | 6833300  | 7053100  | 6636000 NA  |
| 0        | 0 NA        | NA | NA | 0        | 0        | 0 NA        |
| 0        | 0 NA        | NA | NA | 0        | 0        | 0 NA        |
| 0        | 0 NA        | NA | NA | 0        | 0        | 4604100 NA  |
| 0        | 0 NA        | NA | NA | 0        | 0        | 0 NA        |
| 0        | 0 NA        | NA | NA | 0        | 0        | 0 NA        |
| 0        | 0 NA        | NA | NA | 5768800  | 3735400  | 4338700 NA  |
| 0        | 0 NA        | NA | NA | 5398500  | 0        | 4300000 NA  |
| 0        | 0 NA        | NA | NA | 0        | 0        | 0 NA        |
| 3115700  | 0 NA        | NA | NA | 0        | 0        | 0 NA        |
| 2262500  | 594620 NA   | NA | NA | 899760   | 491200   | 0 NA        |
| 0        | 0 NA        | NA | NA | 0        | 0        | 0 NA        |
| 0        | 0 NA        | NA | NA | 10800000 | 6549700  | 15500000 NA |
| 403840   | 0 NA        | NA | NA | 0        | 0        | 3004800 NA  |
| 0        | 0 NA        | NA | NA | 0        | 0        | 0 NA        |
| 0        | 0 NA        | NA | NA | 10500000 | 6423500  | 4657100 NA  |
| 0        | 0 NA        | NA | NA | 33300000 | 27500000 | 33200000 NA |
| 497230   | 892510 NA   | NA | NA | 1757300  | 462800   | 1213400 NA  |
| 0        | 0 NA        | NA | NA | 5217900  | 0        | 0 NA        |
| 0        | 0 NA        | NA | NA | 0        | 0        | 0 NA        |
| 0        | 0 NA        | NA | NA | 0        | 2039300  | 4241900 NA  |
| 0        | 0 NA        | NA | NA | 0        | 0        | 0 NA        |
| 0        | 514210 NA   | NA | NA | 0        | 0        | 0 NA        |

|         |         |    |    |    |         |         |         |    |
|---------|---------|----|----|----|---------|---------|---------|----|
| 0       | 1465000 | NA | NA | NA | 0       | 0       | 0       | NA |
| 0       | 0       | NA | NA | NA | 0       | 291520  | 516860  | NA |
| 0       | 0       | NA | NA | NA | 0       | 0       | 0       | NA |
| 0       | 0       | NA | NA | NA | 0       | 0       | 0       | NA |
| 0       | 0       | NA | NA | NA | 0       | 0       | 0       | NA |
| 0       | 0       | NA | NA | NA | 0       | 0       | 2432500 | NA |
| 0       | 0       | NA | NA | NA | 0       | 0       | 312160  | NA |
| 0       | 506380  | NA | NA | NA | 1448800 | 1396500 | 1307500 | NA |
| 0       | 0       | NA | NA | NA | 723450  | 534910  | 806910  | NA |
| 0       | 0       | NA | NA | NA | 0       | 4680600 | 0       | NA |
| 0       | 0       | NA | NA | NA | 0       | 0       | 0       | NA |
| 0       | 0       | NA | NA | NA | 1841300 | 960720  | 0       | NA |
| 0       | 0       | NA | NA | NA | 7143700 | 0       | 0       | NA |
| 0       | 0       | NA | NA | NA | 3233800 | 0       | 0       | NA |
| 0       | 3734800 | NA | NA | NA | 0       | 0       | 0       | NA |
| 0       | 0       | NA | NA | NA | 2986700 | 7528400 | 2988300 | NA |
| 0       | 0       | NA | NA | NA | 0       | 1186900 | 0       | NA |
| 0       | 352940  | NA | NA | NA | 0       | 0       | 0       | NA |
| 0       | 0       | NA | NA | NA | 8611500 | 1808800 | 0       | NA |
| 0       | 0       | NA | NA | NA | 3384400 | 2394400 | 3707100 | NA |
| 0       | 0       | NA | NA | NA | 1595800 | 696530  | 323130  | NA |
| 0       | 0       | NA | NA | NA | 0       | 0       | 0       | NA |
| 0       | 0       | NA | NA | NA | 0       | 0       | 0       | NA |
| 0       | 0       | NA | NA | NA | 6151900 | 6789200 | 9033500 | NA |
| 0       | 0       | NA | NA | NA | 0       | 0       | 0       | NA |
| 0       | 0       | NA | NA | NA | 0       | 0       | 0       | NA |
| 0       | 0       | NA | NA | NA | 2596800 | 0       | 0       | NA |
| 0       | 0       | NA | NA | NA | 0       | 0       | 0       | NA |
| 0       | 0       | NA | NA | NA | 3206000 | 0       | 2640300 | NA |
| 0       | 0       | NA | NA | NA | 3795600 | 0       | 2745800 | NA |
| 0       | 0       | NA | NA | NA | 0       | 0       | 0       | NA |
| 0       | 0       | NA | NA | NA | 0       | 4670000 | 4307100 | NA |
| 0       | 0       | NA | NA | NA | 0       | 0       | 0       | NA |
| 0       | 0       | NA | NA | NA | 0       | 0       | 0       | NA |
| 0       | 0       | NA | NA | NA | 1233700 | 449220  | 570910  | NA |
| 0       | 0       | NA | NA | NA | 8856600 | 4198000 | 5084300 | NA |
| 0       | 0       | NA | NA | NA | 0       | 0       | 0       | NA |
| 0       | 0       | NA | NA | NA | 0       | 0       | 0       | NA |
| 2304000 | 0       | NA | NA | NA | 0       | 0       | 0       | NA |
| 0       | 0       | NA | NA | NA | 0       | 0       | 6062000 | NA |
| 0       | 0       | NA | NA | NA | 0       | 0       | 0       | NA |
| 0       | 0       | NA | NA | NA | 0       | 0       | 0       | NA |
| 0       | 0       | NA | NA | NA | 0       | 0       | 5667600 | NA |
| 0       | 0       | NA | NA | NA | 496430  | 220730  | 471290  | NA |
| 0       | 1541400 | NA | NA | NA | 1017900 | 0       | 0       | NA |
| 0       | 0       | NA | NA | NA | 0       | 0       | 0       | NA |
| 0       | 0       | NA | NA | NA | 0       | 2337300 | 0       | NA |

|         |           |    |    |         |         |             |
|---------|-----------|----|----|---------|---------|-------------|
| 0       | 0 NA      | NA | NA | 6844900 | 4625500 | 4346600 NA  |
| 0       | 0 NA      | NA | NA | 0       | 0       | 0 NA        |
| 0       | 0 NA      | NA | NA | 0       | 0       | 0 NA        |
| 0       | 0 NA      | NA | NA | 0       | 0       | 0 NA        |
| 0       | 0 NA      | NA | NA | 6005600 | 641330  | 7313900 NA  |
| 0       | 0 NA      | NA | NA | 0       | 0       | 0 NA        |
| 0       | 0 NA      | NA | NA | 0       | 0       | 0 NA        |
| 0       | 0 NA      | NA | NA | 0       | 0       | 0 NA        |
| 0       | 0 NA      | NA | NA | 0       | 0       | 2369900 NA  |
| 0       | 0 NA      | NA | NA | 0       | 0       | 3778500 NA  |
| 8156000 | 0 NA      | NA | NA | 0       | 0       | 0 NA        |
| 0       | 0 NA      | NA | NA | 2591200 | 2263500 | 2770400 NA  |
| 0       | 0 NA      | NA | NA | 0       | 0       | 0 NA        |
| 0       | 0 NA      | NA | NA | 0       | 0       | 2.30E+07 NA |
| 0       | 0 NA      | NA | NA | 0       | 0       | 3865900 NA  |
| 0       | 0 NA      | NA | NA | 0       | 0       | 0 NA        |
| 0       | 0 NA      | NA | NA | 960420  | 157950  | 415450 NA   |
| 0       | 0 NA      | NA | NA | 0       | 0       | 0 NA        |
| 0       | 0 NA      | NA | NA | 7391100 | 4009500 | 6490600 NA  |
| 0       | 0 NA      | NA | NA | 7235200 | 0       | 6731400 NA  |
| 0       | 0 NA      | NA | NA | 0       | 0       | 0 NA        |
| 0       | 0 NA      | NA | NA | 0       | 0       | 0 NA        |
| 0       | 0 NA      | NA | NA | 0       | 0       | 0 NA        |
| 0       | 0 NA      | NA | NA | 0       | 0       | 0 NA        |
| 0       | 0 NA      | NA | NA | 0       | 0       | 0 NA        |
| 0       | 0 NA      | NA | NA | 0       | 0       | 0 NA        |
| 0       | 0 NA      | NA | NA | 0       | 0       | 0 NA        |
| 0       | 0 NA      | NA | NA | 0       | 671760  | 0 NA        |
| 0       | 0 NA      | NA | NA | 0       | 1427700 | 0 NA        |
| 0       | 0 NA      | NA | NA | 0       | 307080  | 0 NA        |
| 0       | 0 NA      | NA | NA | 0       | 0       | 0 NA        |
| 0       | 0 NA      | NA | NA | 0       | 0       | 0 NA        |
| 0       | 0 NA      | NA | NA | 0       | 0       | 0 NA        |
| 0       | 0 NA      | NA | NA | 0       | 0       | 0 NA        |
| 0       | 0 NA      | NA | NA | 0       | 0       | 0 NA        |
| 0       | 0 NA      | NA | NA | 0       | 0       | 4850200 NA  |
| 0       | 645950 NA | NA | NA | 0       | 0       | 0 NA        |
| 0       | 0 NA      | NA | NA | 0       | 0       | 0 NA        |
| 0       | 0 NA      | NA | NA | 0       | 0       | 0 NA        |
| 0       | 0 NA      | NA | NA | 0       | 0       | 0 NA        |
| 0       | 0 NA      | NA | NA | 0       | 0       | 0 NA        |
| 0       | 0 NA      | NA | NA | 0       | 0       | 0 NA        |
| 0       | 0 NA      | NA | NA | 0       | 2359500 | 2150100 NA  |
| 0       | 0 NA      | NA | NA | 0       | 0       | 0 NA        |
| 0       | 0 NA      | NA | NA | 0       | 0       | 0 NA        |
| 0       | 0 NA      | NA | NA | 1474400 | 1021700 | 1196100 NA  |
| 0       | 0 NA      | NA | NA | 0       | 0       | 0 NA        |
| 0       | 0 NA      | NA | NA | 0       | 0       | 206990 NA   |
| 0       | 0 NA      | NA | NA | 0       | 0       | 0 NA        |
| 0       | 0 NA      | NA | NA | 0       | 0       | 0 NA        |

|         |            |    |    |          |          |             |
|---------|------------|----|----|----------|----------|-------------|
| 0       | 0 NA       | NA | NA | 0        | 0        | 0 NA        |
| 0       | 0 NA       | NA | NA | 0        | 0        | 0 NA        |
| 0       | 0 NA       | NA | NA | 0        | 0        | 0 NA        |
| 0       | 4192200 NA | NA | NA | 0        | 0        | 0 NA        |
| 0       | 0 NA       | NA | NA | 0        | 0        | 0 NA        |
| 0       | 0 NA       | NA | NA | 13500000 | 7040800  | 8761200 NA  |
| 0       | 0 NA       | NA | NA | 0        | 0        | 0 NA        |
| 0       | 0 NA       | NA | NA | 0        | 0        | 0 NA        |
| 0       | 0 NA       | NA | NA | 0        | 0        | 0 NA        |
| 0       | 403360 NA  | NA | NA | 6959100  | 10400000 | 4751900 NA  |
| 0       | 0 NA       | NA | NA | 0        | 0        | 0 NA        |
| 0       | 0 NA       | NA | NA | 0        | 0        | 0 NA        |
| 0       | 0 NA       | NA | NA | 0        | 0        | 0 NA        |
| 0       | 0 NA       | NA | NA | 10800000 | 6549700  | 8175400 NA  |
| 0       | 0 NA       | NA | NA | 0        | 0        | 0 NA        |
| 0       | 0 NA       | NA | NA | 0        | 0        | 0 NA        |
| 0       | 0 NA       | NA | NA | 0        | 0        | 0 NA        |
| 0       | 0 NA       | NA | NA | 0        | 0        | 0 NA        |
| 0       | 0 NA       | NA | NA | 0        | 0        | 0 NA        |
| 0       | 0 NA       | NA | NA | 0        | 2337300  | 0 NA        |
| 0       | 0 NA       | NA | NA | 0        | 0        | 0 NA        |
| 0       | 0 NA       | NA | NA | 0        | 0        | 0 NA        |
| 0       | 0 NA       | NA | NA | 0        | 0        | 0 NA        |
| 0       | 0 NA       | NA | NA | 0        | 0        | 0 NA        |
| 0       | 0 NA       | NA | NA | 4718300  | 2102900  | 2762500 NA  |
| 0       | 0 NA       | NA | NA | 0        | 0        | 0 NA        |
| 0       | 0 NA       | NA | NA | 0        | 0        | 0 NA        |
| 0       | 0 NA       | NA | NA | 0        | 0        | 0 NA        |
| 0       | 6460100 NA | NA | NA | 53700000 | 1.60E+07 | 41600000 NA |
| 0       | 0 NA       | NA | NA | 5363700  | 3328000  | 0 NA        |
| 0       | 0 NA       | NA | NA | 0        | 0        | 0 NA        |
| 0       | 0 NA       | NA | NA | 0        | 0        | 0 NA        |
| 0       | 0 NA       | NA | NA | 0        | 0        | 0 NA        |
| 0       | 0 NA       | NA | NA | 0        | 0        | 0 NA        |
| 0       | 0 NA       | NA | NA | 0        | 0        | 0 NA        |
| 0       | 0 NA       | NA | NA | 0        | 0        | 0 NA        |
| 0       | 0 NA       | NA | NA | 0        | 0        | 0 NA        |
| 0       | 0 NA       | NA | NA | 0        | 0        | 0 NA        |
| 0       | 0 NA       | NA | NA | 0        | 0        | 0 NA        |
| 0       | 0 NA       | NA | NA | 0        | 0        | 0 NA        |
| 0       | 0 NA       | NA | NA | 2.20E+07 | 14900000 | 12700000 NA |
| 0       | 0 NA       | NA | NA | 9974300  | 0        | 0 NA        |
| 0       | 0 NA       | NA | NA | 4883900  | 4310000  | 0 NA        |
| 0       | 0 NA       | NA | NA | 0        | 3532600  | 0 NA        |
| 0       | 0 NA       | NA | NA | 0        | 0        | 0 NA        |
| 0       | 0 NA       | NA | NA | 0        | 0        | 0 NA        |
| 2837800 | 0 NA       | NA | NA | 0        | 0        | 0 NA        |
| 0       | 0 NA       | NA | NA | 0        | 0        | 0 NA        |
| 0       | 0 NA       | NA | NA | 0        | 0        | 0 NA        |



|    |    |          |          |          |    |    |    |          |
|----|----|----------|----------|----------|----|----|----|----------|
| NA | NA | 3.86E+08 | 2.89E+08 | 6.22E+08 | NA | NA | NA | 2.10E+08 |
| NA | NA | 2171500  | 0        | 0        | NA | NA | NA | 0        |
| NA | NA | 0        | 392960   | 3730700  | NA | NA | NA | 28300000 |
| NA | NA | 1169000  | 1121400  | 13900000 | NA | NA | NA | 79200000 |
| NA | NA | 38200000 | 24900000 | 36400000 | NA | NA | NA | 81200000 |
| NA | NA | 4265100  | 4347200  | 9623600  | NA | NA | NA | 14100000 |
| NA | NA | 32500000 | 21600000 | 61600000 | NA | NA | NA | 1.04E+08 |
| NA | NA | 9175700  | 6357700  | 13900000 | NA | NA | NA | 22500000 |
| NA | NA | 13600000 | 8010100  | 24400000 | NA | NA | NA | 1.34E+08 |
| NA | NA | 3113000  | 5165000  | 21500000 | NA | NA | NA | 23800000 |
| NA | NA | 11900000 | 3131700  | 19600000 | NA | NA | NA | 85600000 |
| NA | NA | 0        | 1443800  | 5666600  | NA | NA | NA | 13400000 |
| NA | NA | 921580   | 1029200  | 3589200  | NA | NA | NA | 18700000 |
| NA | NA | 21900000 | 17800000 | 37100000 | NA | NA | NA | 69900000 |
| NA | NA | 1130500  | 1114500  | 2310400  | NA | NA | NA | 5325700  |
| NA | NA | 17900000 | 11100000 | 14900000 | NA | NA | NA | 42900000 |
| NA | NA | 0        | 0        | 0        | NA | NA | NA | 5339700  |
| NA | NA | 11300000 | 7995800  | 28200000 | NA | NA | NA | 20700000 |
| NA | NA | 0        | 0        | 0        | NA | NA | NA | 20700000 |
| NA | NA | 0        | 0        | 2713600  | NA | NA | NA | 27800000 |
| NA | NA | 6713600  | 4179600  | 5175900  | NA | NA | NA | 2924200  |
| NA | NA | 0        | 0        | 663710   | NA | NA | NA | 4414100  |
| NA | NA | 267370   | 254980   | 1282300  | NA | NA | NA | 23600000 |
| NA | NA | 1.20E+07 | 9311400  | 16500000 | NA | NA | NA | 11100000 |
| NA | NA | 232780   | 0        | 3493300  | NA | NA | NA | 5229900  |
| NA | NA | 505860   | 0        | 0        | NA | NA | NA | 6396700  |
| NA | NA | 0        | 5175300  | 0        | NA | NA | NA | 0        |
| NA | NA | 620100   | 606320   | 2329900  | NA | NA | NA | 44400000 |
| NA | NA | 0        | 0        | 0        | NA | NA | NA | 12600000 |
| NA | NA | 0        | 0        | 0        | NA | NA | NA | 6528200  |
| NA | NA | 3021300  | 4009400  | 6880200  | NA | NA | NA | 14300000 |
| NA | NA | 974240   | 0        | 2371900  | NA | NA | NA | 5120500  |
| NA | NA | 0        | 0        | 0        | NA | NA | NA | 5305300  |
| NA | NA | 3839200  | 3557400  | 6218300  | NA | NA | NA | 8223100  |
| NA | NA | 0        | 3238800  | 2112900  | NA | NA | NA | 12100000 |
| NA | NA | 0        | 0        | 1087300  | NA | NA | NA | 8521600  |
| NA | NA | 1730000  | 594520   | 515030   | NA | NA | NA | 1369300  |
| NA | NA | 0        | 0        | 0        | NA | NA | NA | 2699300  |
| NA | NA | 1106300  | 563700   | 3447900  | NA | NA | NA | 1042200  |
| NA | NA | 0        | 0        | 0        | NA | NA | NA | 7580700  |
| NA | NA | 0        | 569180   | 807270   | NA | NA | NA | 3838900  |
| NA | NA | 0        | 0        | 0        | NA | NA | NA | 0        |
| NA | NA | 0        | 0        | 0        | NA | NA | NA | 9908500  |
| NA | NA | 0        | 0        | 404440   | NA | NA | NA | 0        |
| NA | NA | 0        | 0        | 0        | NA | NA | NA | 6004900  |
| NA | NA | 0        | 0        | 0        | NA | NA | NA | 4002300  |
| NA | NA | 754830   | 246190   | 0        | NA | NA | NA | 6957300  |

|    |    |         |          |          |    |    |    |          |
|----|----|---------|----------|----------|----|----|----|----------|
| NA | NA | 1935300 | 750070   | 1603000  | NA | NA | NA | 1600500  |
| NA | NA | 0       | 0        | 0        | NA | NA | NA | 0        |
| NA | NA | 9783400 | 0        | 0        | NA | NA | NA | 0        |
| NA | NA | 0       | 0        | 0        | NA | NA | NA | 3465800  |
| NA | NA | 0       | 0        | 0        | NA | NA | NA | 0        |
| NA | NA | 0       | 0        | 10700000 | NA | NA | NA | 0        |
| NA | NA | 9865000 | 2441400  | 5173300  | NA | NA | NA | 0        |
| NA | NA | 0       | 0        | 0        | NA | NA | NA | 5205300  |
| NA | NA | 0       | 0        | 0        | NA | NA | NA | 3481300  |
| NA | NA | 0       | 0        | 0        | NA | NA | NA | 0        |
| NA | NA | 1976200 | 1148700  | 7085100  | NA | NA | NA | 15100000 |
| NA | NA | 0       | 0        | 0        | NA | NA | NA | 1698800  |
| NA | NA | 0       | 0        | 0        | NA | NA | NA | 3860700  |
| NA | NA | 0       | 0        | 0        | NA | NA | NA | 8063300  |
| NA | NA | 0       | 0        | 0        | NA | NA | NA | 5660600  |
| NA | NA | 373520  | 0        | 318530   | NA | NA | NA | 304520   |
| NA | NA | 0       | 0        | 0        | NA | NA | NA | 3640600  |
| NA | NA | 0       | 0        | 0        | NA | NA | NA | 2464000  |
| NA | NA | 2791600 | 2603400  | 2496600  | NA | NA | NA | 583690   |
| NA | NA | 0       | 0        | 0        | NA | NA | NA | 4925800  |
| NA | NA | 0       | 0        | 0        | NA | NA | NA | 2396100  |
| NA | NA | 0       | 0        | 1799300  | NA | NA | NA | 1922800  |
| NA | NA | 0       | 0        | 0        | NA | NA | NA | 1317900  |
| NA | NA | 0       | 0        | 0        | NA | NA | NA | 350700   |
| NA | NA | 0       | 0        | 978660   | NA | NA | NA | 0        |
| NA | NA | 6734100 | 2.14E+08 | 0        | NA | NA | NA | 0        |
| NA | NA | 748020  | 556360   | 2233200  | NA | NA | NA | 14100000 |
| NA | NA | 1080700 | 966600   | 608430   | NA | NA | NA | 3638400  |
| NA | NA | 0       | 0        | 0        | NA | NA | NA | 0        |
| NA | NA | 0       | 0        | 0        | NA | NA | NA | 11900000 |
| NA | NA | 0       | 0        | 0        | NA | NA | NA | 0        |
| NA | NA | 0       | 0        | 3412400  | NA | NA | NA | 0        |
| NA | NA | 0       | 0        | 0        | NA | NA | NA | 4083500  |
| NA | NA | 1535800 | 0        | 761460   | NA | NA | NA | 453210   |
| NA | NA | 0       | 0        | 0        | NA | NA | NA | 3923100  |
| NA | NA | 0       | 0        | 0        | NA | NA | NA | 825020   |
| NA | NA | 0       | 0        | 0        | NA | NA | NA | 13300000 |
| NA | NA | 435880  | 341050   | 865280   | NA | NA | NA | 0        |
| NA | NA | 0       | 0        | 0        | NA | NA | NA | 593450   |
| NA | NA | 0       | 0        | 0        | NA | NA | NA | 1097800  |
| NA | NA | 410720  | 319110   | 0        | NA | NA | NA | 1856400  |
| NA | NA | 0       | 0        | 0        | NA | NA | NA | 1652800  |
| NA | NA | 0       | 0        | 0        | NA | NA | NA | 4227500  |
| NA | NA | 0       | 0        | 0        | NA | NA | NA | 0        |
| NA | NA | 0       | 0        | 2364800  | NA | NA | NA | 1388400  |
| NA | NA | 791230  | 0        | 0        | NA | NA | NA | 3172300  |
| NA | NA | 0       | 0        | 635160   | NA | NA | NA | 4976000  |

|    |    |         |          |          |    |    |    |         |
|----|----|---------|----------|----------|----|----|----|---------|
| NA | NA | 0       | 28800000 | 0        | NA | NA | NA | 1515100 |
| NA | NA | 423380  | 0        | 0        | NA | NA | NA | 0       |
| NA | NA | 0       | 0        | 0        | NA | NA | NA | 1871200 |
| NA | NA | 0       | 0        | 0        | NA | NA | NA | 300640  |
| NA | NA | 0       | 0        | 0        | NA | NA | NA | 0       |
| NA | NA | 0       | 215330   | 0        | NA | NA | NA | 6597000 |
| NA | NA | 0       | 0        | 0        | NA | NA | NA | 0       |
| NA | NA | 0       | 0        | 0        | NA | NA | NA | 0       |
| NA | NA | 0       | 0        | 0        | NA | NA | NA | 0       |
| NA | NA | 557240  | 0        | 0        | NA | NA | NA | 0       |
| NA | NA | 0       | 0        | 0        | NA | NA | NA | 0       |
| NA | NA | 379130  | 380910   | 0        | NA | NA | NA | 1534200 |
| NA | NA | 0       | 0        | 0        | NA | NA | NA | 1801700 |
| NA | NA | 0       | 0        | 0        | NA | NA | NA | 7965800 |
| NA | NA | 0       | 0        | 0        | NA | NA | NA | 7884800 |
| NA | NA | 0       | 0        | 0        | NA | NA | NA | 8442900 |
| NA | NA | 0       | 0        | 0        | NA | NA | NA | 559980  |
| NA | NA | 0       | 0        | 0        | NA | NA | NA | 1563700 |
| NA | NA | 0       | 0        | 0        | NA | NA | NA | 0       |
| NA | NA | 0       | 0        | 0        | NA | NA | NA | 0       |
| NA | NA | 1016600 | 0        | 1650900  | NA | NA | NA | 5461400 |
| NA | NA | 0       | 0        | 0        | NA | NA | NA | 2004700 |
| NA | NA | 0       | 0        | 0        | NA | NA | NA | 0       |
| NA | NA | 0       | 0        | 0        | NA | NA | NA | 3928700 |
| NA | NA | 0       | 0        | 0        | NA | NA | NA | 3208000 |
| NA | NA | 0       | 0        | 0        | NA | NA | NA | 0       |
| NA | NA | 0       | 0        | 0        | NA | NA | NA | 3755400 |
| NA | NA | 0       | 0        | 0        | NA | NA | NA | 0       |
| NA | NA | 755720  | 454710   | 1013200  | NA | NA | NA | 707720  |
| NA | NA | 0       | 0        | 0        | NA | NA | NA | 0       |
| NA | NA | 0       | 0        | 0        | NA | NA | NA | 0       |
| NA | NA | 0       | 3976500  | 0        | NA | NA | NA | 275050  |
| NA | NA | 0       | 0        | 0        | NA | NA | NA | 1714900 |
| NA | NA | 0       | 852950   | 0        | NA | NA | NA | 2994800 |
| NA | NA | 486260  | 0        | 0        | NA | NA | NA | 1721800 |
| NA | NA | 0       | 0        | 0        | NA | NA | NA | 565450  |
| NA | NA | 0       | 0        | 0        | NA | NA | NA | 0       |
| NA | NA | 0       | 0        | 0        | NA | NA | NA | 0       |
| NA | NA | 0       | 0        | 0        | NA | NA | NA | 379640  |
| NA | NA | 0       | 0        | 0        | NA | NA | NA | 2060400 |
| NA | NA | 0       | 0        | 2.80E+07 | NA | NA | NA | 0       |
| NA | NA | 0       | 0        | 0        | NA | NA | NA | 0       |
| NA | NA | 552660  | 0        | 0        | NA | NA | NA | 0       |
| NA | NA | 0       | 0        | 0        | NA | NA | NA | 1756600 |
| NA | NA | 0       | 0        | 0        | NA | NA | NA | 0       |
| NA | NA | 0       | 0        | 0        | NA | NA | NA | 1645800 |
| NA | NA | 0       | 0        | 0        | NA | NA | NA | 830060  |



|    |    |         |         |         |    |    |    |          |
|----|----|---------|---------|---------|----|----|----|----------|
| NA | NA | 0       | 0       | 0       | NA | NA | NA | 275440   |
| NA | NA | 0       | 0       | 0       | NA | NA | NA | 820170   |
| NA | NA | 0       | 0       | 0       | NA | NA | NA | 0        |
| NA | NA | 0       | 0       | 93852   | NA | NA | NA | 0        |
| NA | NA | 0       | 0       | 0       | NA | NA | NA | 0        |
| NA | NA | 0       | 0       | 0       | NA | NA | NA | 0        |
| NA | NA | 0       | 0       | 3278200 | NA | NA | NA | 0        |
| NA | NA | 0       | 0       | 0       | NA | NA | NA | 1107300  |
| NA | NA | 748020  | 556360  | 2233200 | NA | NA | NA | 14100000 |
| NA | NA | 0       | 0       | 0       | NA | NA | NA | 0        |
| NA | NA | 0       | 0       | 0       | NA | NA | NA | 2053000  |
| NA | NA | 0       | 0       | 0       | NA | NA | NA | 0        |
| NA | NA | 0       | 0       | 0       | NA | NA | NA | 0        |
| NA | NA | 0       | 0       | 0       | NA | NA | NA | 0        |
| NA | NA | 0       | 0       | 0       | NA | NA | NA | 0        |
| NA | NA | 0       | 0       | 0       | NA | NA | NA | 0        |
| NA | NA | 0       | 0       | 1183800 | NA | NA | NA | 3117000  |
| NA | NA | 0       | 0       | 0       | NA | NA | NA | 0        |
| NA | NA | 0       | 0       | 0       | NA | NA | NA | 1150000  |
| NA | NA | 0       | 0       | 0       | NA | NA | NA | 1605000  |
| NA | NA | 0       | 0       | 0       | NA | NA | NA | 0        |
| NA | NA | 0       | 0       | 0       | NA | NA | NA | 1038200  |
| NA | NA | 0       | 0       | 0       | NA | NA | NA | 0        |
| NA | NA | 0       | 0       | 0       | NA | NA | NA | 3883500  |
| NA | NA | 0       | 0       | 751310  | NA | NA | NA | 1117400  |
| NA | NA | 0       | 0       | 0       | NA | NA | NA | 1163900  |
| NA | NA | 0       | 0       | 0       | NA | NA | NA | 0        |
| NA | NA | 0       | 0       | 0       | NA | NA | NA | 0        |
| NA | NA | 0       | 0       | 0       | NA | NA | NA | 0        |
| NA | NA | 0       | 0       | 0       | NA | NA | NA | 0        |
| NA | NA | 0       | 0       | 0       | NA | NA | NA | 0        |
| NA | NA | 0       | 0       | 0       | NA | NA | NA | 1327700  |
| NA | NA | 0       | 0       | 0       | NA | NA | NA | 0        |
| NA | NA | 0       | 0       | 359200  | NA | NA | NA | 0        |
| NA | NA | 0       | 0       | 0       | NA | NA | NA | 0        |
| NA | NA | 0       | 0       | 0       | NA | NA | NA | 0        |
| NA | NA | 0       | 0       | 449040  | NA | NA | NA | 0        |
| NA | NA | 0       | 934260  | 1644500 | NA | NA | NA | 0        |
| NA | NA | 0       | 0       | 0       | NA | NA | NA | 2392800  |
| NA | NA | 0       | 0       | 0       | NA | NA | NA | 0        |
| NA | NA | 4384200 | 0       | 0       | NA | NA | NA | 0        |
| NA | NA | 0       | 0       | 0       | NA | NA | NA | 0        |
| NA | NA | 0       | 0       | 0       | NA | NA | NA | 0        |
| NA | NA | 3276300 | 1091000 | 2395500 | NA | NA | NA | 0        |
| NA | NA | 0       | 0       | 0       | NA | NA | NA | 257570   |
| NA | NA | 0       | 0       | 0       | NA | NA | NA | 856280   |
| NA | NA | 0       | 0       | 0       | NA | NA | NA | 1877300  |
| NA | NA | 0       | 0       | 874330  | NA | NA | NA | 0        |

|    |    |          |          |          |    |    |    |          |
|----|----|----------|----------|----------|----|----|----|----------|
| NA | NA | 0        | 0        | 0        | NA | NA | NA | 0        |
| NA | NA | 0        | 0        | 0        | NA | NA | NA | 0        |
| NA | NA | 7066900  | 0        | 4351900  | NA | NA | NA | 0        |
| NA | NA | 0        | 0        | 0        | NA | NA | NA | 0        |
| NA | NA | 0        | 0        | 0        | NA | NA | NA | 1326100  |
| NA | NA | 0        | 0        | 0        | NA | NA | NA | 2322800  |
| NA | NA | 9882200  | 8852900  | 23100000 | NA | NA | NA | 1.54E+08 |
| NA | NA | 0        | 0        | 0        | NA | NA | NA | 0        |
| NA | NA | 0        | 0        | 0        | NA | NA | NA | 0        |
| NA | NA | 0        | 0        | 0        | NA | NA | NA | 0        |
| NA | NA | 0        | 0        | 0        | NA | NA | NA | 0        |
| NA | NA | 2.23E+08 | 45600000 | 4.47E+08 | NA | NA | NA | 4.55E+08 |
| NA | NA | 0        | 0        | 0        | NA | NA | NA | 1739700  |
| NA | NA | 0        | 0        | 0        | NA | NA | NA | 0        |
| NA | NA | 0        | 0        | 0        | NA | NA | NA | 0        |
| NA | NA | 0        | 0        | 0        | NA | NA | NA | 0        |
| NA | NA | 0        | 0        | 0        | NA | NA | NA | 0        |
| NA | NA | 0        | 0        | 0        | NA | NA | NA | 0        |
| NA | NA | 0        | 0        | 0        | NA | NA | NA | 1025700  |
| NA | NA | 0        | 0        | 0        | NA | NA | NA | 983110   |
| NA | NA | 0        | 0        | 0        | NA | NA | NA | 0        |
| NA | NA | 0        | 0        | 0        | NA | NA | NA | 659820   |
| NA | NA | 0        | 0        | 0        | NA | NA | NA | 1167800  |
| NA | NA | 0        | 0        | 0        | NA | NA | NA | 0        |
| NA | NA | 0        | 0        | 0        | NA | NA | NA | 0        |
| NA | NA | 0        | 0        | 0        | NA | NA | NA | 0        |
| NA | NA | 0        | 0        | 0        | NA | NA | NA | 0        |
| NA | NA | 0        | 0        | 0        | NA | NA | NA | 0        |
| NA | NA | 0        | 0        | 0        | NA | NA | NA | 0        |
| NA | NA | 0        | 0        | 0        | NA | NA | NA | 0        |
| NA | NA | 0        | 0        | 0        | NA | NA | NA | 0        |
| NA | NA | 0        | 0        | 0        | NA | NA | NA | 0        |
| NA | NA | 0        | 0        | 0        | NA | NA | NA | 0        |
| NA | NA | 0        | 0        | 0        | NA | NA | NA | 0        |
| NA | NA | 0        | 0        | 0        | NA | NA | NA | 0        |
| NA | NA | 0        | 0        | 0        | NA | NA | NA | 0        |
| NA | NA | 0        | 0        | 0        | NA | NA | NA | 0        |
| NA | NA | 0        | 0        | 0        | NA | NA | NA | 0        |
| NA | NA | 0        | 0        | 0        | NA | NA | NA | 0        |
| NA | NA | 0        | 0        | 0        | NA | NA | NA | 0        |
| NA | NA | 0        | 0        | 0        | NA | NA | NA | 0        |
| NA | NA | 0        | 0        | 0        | NA | NA | NA | 0        |
| NA | NA | 0        | 0        | 0        | NA | NA | NA | 0        |
| NA | NA | 0        | 0        | 0        | NA | NA | NA | 0        |
| NA | NA | 0        | 0        | 0        | NA | NA | NA | 0        |
| NA | NA | 0        | 0        | 0        | NA | NA | NA | 0        |
| NA | NA | 0        | 0        | 0        | NA | NA | NA | 0        |
| NA | NA | 762110   | 0        | 0        | NA | NA | NA | 0        |
| NA | NA | 0        | 0        | 0        | NA | NA | NA | 0        |
| NA | NA | 0        | 0        | 0        | NA | NA | NA | 0        |
| NA | NA | 0        | 0        | 0        | NA | NA | NA | 690310   |
| NA | NA | 0        | 0        | 0        | NA | NA | NA | 0        |

|    |    |          |          |          |    |    |    |          |
|----|----|----------|----------|----------|----|----|----|----------|
| NA | NA | 0        | 0        | 0        | NA | NA | NA | 0        |
| NA | NA | 0        | 0        | 0        | NA | NA | NA | 0        |
| NA | NA | 0        | 0        | 0        | NA | NA | NA | 0        |
| NA | NA | 0        | 0        | 0        | NA | NA | NA | 0        |
| NA | NA | 0        | 0        | 0        | NA | NA | NA | 0        |
| NA | NA | 0        | 0        | 0        | NA | NA | NA | 0        |
| NA | NA | 0        | 0        | 0        | NA | NA | NA | 0        |
| NA | NA | 0        | 1139400  | 0        | NA | NA | NA | 0        |
| NA | NA | 0        | 0        | 0        | NA | NA | NA | 3706200  |
| NA | NA | 0        | 1235300  | 3136900  | NA | NA | NA | 0        |
| NA | NA | 0        | 0        | 0        | NA | NA | NA | 0        |
| NA | NA | 0        | 0        | 0        | NA | NA | NA | 2983500  |
| NA | NA | 0        | 0        | 0        | NA | NA | NA | 0        |
| NA | NA | 0        | 0        | 0        | NA | NA | NA | 0        |
| NA | NA | 0        | 0        | 0        | NA | NA | NA | 0        |
| NA | NA | 0        | 0        | 0        | NA | NA | NA | 2673700  |
| NA | NA | 0        | 0        | 0        | NA | NA | NA | 0        |
| NA | NA | 0        | 0        | 0        | NA | NA | NA | 0        |
| NA | NA | 0        | 0        | 0        | NA | NA | NA | 0        |
| NA | NA | 0        | 0        | 838560   | NA | NA | NA | 0        |
| NA | NA | 0        | 0        | 0        | NA | NA | NA | 0        |
| NA | NA | 0        | 0        | 0        | NA | NA | NA | 0        |
| NA | NA | 0        | 0        | 0        | NA | NA | NA | 0        |
| NA | NA | 0        | 0        | 0        | NA | NA | NA | 0        |
| NA | NA | 0        | 0        | 0        | NA | NA | NA | 0        |
| NA | NA | 0        | 0        | 0        | NA | NA | NA | 232920   |
| NA | NA | 0        | 0        | 0        | NA | NA | NA | 0        |
| NA | NA | 0        | 0        | 0        | NA | NA | NA | 0        |
| NA | NA | 0        | 0        | 0        | NA | NA | NA | 0        |
| NA | NA | 0        | 0        | 0        | NA | NA | NA | 0        |
| NA | NA | 0        | 0        | 0        | NA | NA | NA | 0        |
| NA | NA | 1400100  | 863620   | 0        | NA | NA | NA | 10300000 |
| NA | NA | 0        | 0        | 0        | NA | NA | NA | 0        |
| NA | NA | 0        | 0        | 0        | NA | NA | NA | 0        |
| NA | NA | 0        | 0        | 0        | NA | NA | NA | 0        |
| NA | NA | 7203100  | 5635400  | 11100000 | NA | NA | NA | 2.50E+07 |
| NA | NA | 0        | 0        | 1073100  | NA | NA | NA | 0        |
| NA | NA | 0        | 0        | 0        | NA | NA | NA | 0        |
| NA | NA | 0        | 0        | 0        | NA | NA | NA | 0        |
| NA | NA | 0        | 0        | 0        | NA | NA | NA | 0        |
| NA | NA | 0        | 0        | 0        | NA | NA | NA | 0        |
| NA | NA | 33600000 | 20100000 | 19300000 | NA | NA | NA | 2613200  |
| NA | NA | 0        | 0        | 0        | NA | NA | NA | 0        |
| NA | NA | 0        | 0        | 0        | NA | NA | NA | 0        |
| NA | NA | 755720   | 454710   | 1013200  | NA | NA | NA | 707720   |
| NA | NA | 0        | 0        | 0        | NA | NA | NA | 4632800  |
| NA | NA | 0        | 0        | 0        | NA | NA | NA | 1537500  |



|          |          |         |         |          |          |          |          |    |
|----------|----------|---------|---------|----------|----------|----------|----------|----|
| 0        | 1200000  | NA      | NA      | NA       | 1401400  | 1199800  | 7218700  | NA |
| 1630000  | 0        | NA      | NA      | NA       | 7700700  | 7141400  | 6253100  | NA |
| 22300000 | 23200000 | NA      | NA      | NA       | 38700000 | 28200000 | 4.60E+07 | NA |
| 0        | 799420   | NA      | NA      | NA       | 9518500  | 2585700  | 16100000 | NA |
| NA       | NA       | 7913800 | 1395100 | 16200000 | NA       | NA       | NA       | 0  |

| FFPE_MAX<br>F4.2 | FFPE_MAX<br>F8.2 | FFPE_TX.M<br>F3.1.M | FFPE_TX.M<br>F5.1.M | FFPE_TX.M<br>F7.1.M | FFPE_TX.M<br>F3.2.M | FFPE_TX.M<br>F5.2.M | FFPE_TX.M<br>F7.2.M | FFPE_TX.M<br>F2.1.M | FFPE_SDS.I |
|------------------|------------------|---------------------|---------------------|---------------------|---------------------|---------------------|---------------------|---------------------|------------|
| 7.26E+08         | 1.47E+09         | 4.27E+09            | 3.04E+09            | 1.59E+09            | 1.91E+09            | 9.98E+08            | 1.37E+09            | 8.58E+09            |            |
| 1.78E+09         | 1.78E+09         | 4.27E+09            | 4.03E+09            | 5.18E+09            | 1.90E+09            | 1.32E+09            | 3.12E+09            | 6.16E+09            |            |
| 3.02E+09         | 3.50E+09         | 7.85E+09            | 6.87E+09            | 9.57E+09            | 3.64E+09            | 2.52E+09            | 5.89E+09            | 1.07E+10            |            |
| 1.03E+09         | 1.02E+09         | 2.12E+09            | 1.99E+09            | 3.00E+09            | 9.06E+08            | 6.48E+08            | 1.73E+09            | 3.07E+09            |            |
| 1.59E+09         | 1.50E+09         | 3.43E+09            | 3.10E+09            | 4.16E+09            | 1.55E+09            | 1.12E+09            | 2.59E+09            | 4.12E+09            |            |
| 3.85E+08         | 1.07E+09         | 1.47E+09            | 3.92E+09            | 2.65E+09            | 6.61E+08            | 1.28E+09            | 1.35E+09            | 1.10E+09            |            |
| 8.76E+08         | 1.82E+09         | 6.23E+09            | 5.87E+09            | 3.20E+09            | 2.40E+09            | 1.73E+09            | 2.32E+09            | 5.68E+09            |            |
| 4.24E+09         | 4.48E+09         | 1.06E+10            | 8.96E+09            | 1.23E+10            | 4.78E+09            | 3.00E+09            | 8.24E+09            | 1.25E+10            |            |
| 1.32E+09         | 1.33E+09         | 2.48E+09            | 2.41E+09            | 3.33E+09            | 1.30E+09            | 8.96E+08            | 2.13E+09            | 3.51E+09            |            |
| 5.61E+08         | 7.11E+08         | 1.18E+09            | 1.25E+09            | 1.80E+09            | 6.85E+08            | 4.65E+08            | 1.19E+09            | 1.75E+09            |            |
| 1.53E+09         | 1.55E+09         | 2.93E+09            | 2.87E+09            | 3.72E+09            | 1.58E+09            | 1.13E+09            | 2.62E+09            | 4.09E+09            |            |
| 9.90E+08         | 1.84E+09         | 5.36E+09            | 2.92E+09            | 1.80E+09            | 3.18E+09            | 1.24E+09            | 1.24E+09            | 7.14E+09            |            |
| 1.05E+09         | 1.09E+09         | 2.22E+09            | 2.21E+09            | 3.17E+09            | 9.38E+08            | 8.34E+08            | 1.89E+09            | 3.00E+09            |            |
| 6.50E+08         | 7.64E+08         | 1.82E+09            | 1.69E+09            | 2.33E+09            | 7.29E+08            | 5.09E+08            | 1.16E+09            | 2.72E+09            |            |
| 4.89E+08         | 4.22E+08         | 1.21E+09            | 1.22E+09            | 1.86E+09            | 3.93E+08            | 3.40E+08            | 8.76E+08            | 1.67E+09            |            |
| 83200000         | 1.28E+08         | 2.84E+08            | 2.29E+08            | 3.64E+08            | 1.44E+08            | 82600000            | 2.00E+08            | 3.66E+08            |            |
| 1.61E+08         | 1.94E+08         | 4.50E+08            | 4.12E+08            | 6.49E+08            | 1.67E+08            | 1.56E+08            | 3.75E+08            | 5.99E+08            |            |
| 1.15E+09         | 1.20E+09         | 2.65E+09            | 2.50E+09            | 3.13E+09            | 1.08E+09            | 8.75E+08            | 2.01E+09            | 3.67E+09            |            |
| 2.23E+08         | 2.43E+08         | 4.97E+08            | 4.54E+08            | 6.47E+08            | 2.47E+08            | 1.77E+08            | 4.70E+08            | 5.83E+08            |            |
| 4.27E+08         | 4.17E+08         | 8.01E+08            | 8.76E+08            | 1.07E+09            | 3.57E+08            | 3.09E+08            | 6.97E+08            | 1.35E+09            |            |
| 3.79E+08         | 4.15E+08         | 1.14E+09            | 8.70E+08            | 1.60E+09            | 5.27E+08            | 3.54E+08            | 8.99E+08            | 1.58E+09            |            |
| 8.58E+08         | 8.93E+08         | 1.97E+09            | 1.44E+09            | 2.46E+09            | 8.04E+08            | 5.70E+08            | 1.41E+09            | 2.68E+09            |            |
| 2.53E+08         | 2.96E+08         | 5.59E+08            | 5.49E+08            | 8.62E+08            | 2.44E+08            | 2.07E+08            | 4.28E+08            | 8.62E+08            |            |
| 9.62E+08         | 8.55E+08         | 1.69E+09            | 1.83E+09            | 1.27E+09            | 6.93E+08            | 5.58E+08            | 7.31E+08            | 1.82E+09            |            |
| 4.08E+08         | 5.48E+08         | 1.50E+09            | 1.37E+09            | 2.14E+09            | 5.75E+08            | 5.37E+08            | 7.73E+08            | 1.18E+09            |            |
| 3.60E+08         | 4.15E+08         | 1.06E+09            | 1.01E+09            | 1.35E+09            | 5.00E+08            | 3.21E+08            | 7.81E+08            | 1.34E+09            |            |
| 1.61E+08         | 1.99E+08         | 3.70E+08            | 2.80E+08            | 4.96E+08            | 1.72E+08            | 1.11E+08            | 3.13E+08            | 5.77E+08            |            |
| 7.68E+08         | 1.04E+09         | 2.18E+09            | 1.73E+09            | 2.23E+09            | 8.68E+08            | 6.08E+08            | 1.49E+09            | 3.57E+09            |            |
| 4.01E+08         | 5.91E+08         | 1.23E+09            | 1.20E+09            | 1.47E+09            | 5.90E+08            | 3.92E+08            | 9.75E+08            | 1.63E+09            |            |
| 6.03E+08         | 6.10E+08         | 1.12E+09            | 9.67E+08            | 1.34E+09            | 3.91E+08            | 3.32E+08            | 8.71E+08            | 1.78E+09            |            |
| 1.15E+08         | 1.84E+08         | 3.48E+08            | 3.84E+08            | 3.51E+08            | 1.50E+08            | 1.25E+08            | 1.76E+08            | 4.69E+08            |            |
| 7.38E+08         | 6.32E+08         | 1.70E+09            | 1.74E+09            | 1.85E+09            | 7.51E+08            | 4.99E+08            | 1.07E+09            | 1.64E+09            |            |
| 4.34E+08         | 4.51E+08         | 1.01E+09            | 9.38E+08            | 1.22E+09            | 3.86E+08            | 2.94E+08            | 8.26E+08            | 1.36E+09            |            |
| 3.11E+08         | 3.43E+08         | 7.90E+08            | 4.09E+08            | 8.93E+08            | 3.32E+08            | 1.76E+08            | 5.22E+08            | 6.35E+08            |            |
| 4.35E+08         | 3.53E+08         | 7.69E+08            | 8.34E+08            | 8.87E+08            | 3.23E+08            | 3.07E+08            | 5.17E+08            | 9.61E+08            |            |
| 2.00E+08         | 1.64E+08         | 3.35E+08            | 3.91E+08            | 5.68E+08            | 1.54E+08            | 1.05E+08            | 2.90E+08            | 5.10E+08            |            |
| 90800000         | 1.37E+08         | 3.27E+08            | 3.00E+08            | 4.35E+08            | 1.10E+08            | 95800000            | 2.17E+08            | 5.17E+08            |            |
| 5.89E+08         | 5.02E+08         | 9.24E+08            | 9.40E+08            | 9.82E+08            | 4.05E+08            | 3.40E+08            | 6.01E+08            | 1.29E+09            |            |
| 2.65E+08         | 2.50E+08         | 3.52E+08            | 3.50E+08            | 6.10E+08            | 1.99E+08            | 1.46E+08            | 4.45E+08            | 7.71E+08            |            |
| 1.20E+08         | 1.01E+08         | 4.26E+08            | 3.62E+08            | 5.87E+08            | 1.27E+08            | 85700000            | 2.10E+08            | 6.63E+08            |            |
| 66800000         | 56600000         | 1.28E+08            | 1.69E+08            | 1.47E+08            | 51300000            | 35700000            | 1.35E+08            | 1.90E+08            |            |
| 92800000         | 79500000         | 1.58E+08            | 1.62E+08            | 1.95E+08            | 81200000            | 5.80E+07            | 1.24E+08            | 1.89E+08            |            |
| 1.90E+08         | 2.32E+08         | 4.74E+08            | 3.74E+08            | 5.32E+08            | 2.26E+08            | 1.86E+08            | 4.01E+08            | 5.58E+08            |            |
| 23300000         | 5218600          | 24800000            | 1.05E+08            | 50300000            | 25600000            | 61100000            | 32300000            | 8.10E+07            |            |
| 2.42E+08         | 2.46E+08         | 5.97E+08            | 5.48E+08            | 7.31E+08            | 3.01E+08            | 2.08E+08            | 4.85E+08            | 9.19E+08            |            |

|          |          |          |          |          |          |          |          |          |
|----------|----------|----------|----------|----------|----------|----------|----------|----------|
| 0        | 0        | 43100000 | 1018100  | 1205000  | 873080   | 0        | 0        | 7551800  |
| 1.22E+08 | 1.45E+08 | 3.45E+08 | 3.23E+08 | 3.59E+08 | 1.56E+08 | 1.36E+08 | 2.67E+08 | 4.36E+08 |
| 1.81E+08 | 2.40E+08 | 4.74E+08 | 4.68E+08 | 6.85E+08 | 2.61E+08 | 1.76E+08 | 4.32E+08 | 7.87E+08 |
| 4.85E+08 | 5.11E+08 | 8.72E+08 | 9.71E+08 | 1.26E+09 | 4.72E+08 | 3.98E+08 | 8.57E+08 | 1.52E+09 |
| 96100000 | 74200000 | 1.46E+08 | 1.28E+08 | 1.35E+08 | 54700000 | 49600000 | 1.85E+08 | 2.46E+08 |
| 59700000 | 55500000 | 1.03E+08 | 1.18E+08 | 1.68E+08 | 70200000 | 49500000 | 82900000 | 1.79E+08 |
| 1.49E+08 | 1.29E+08 | 2.76E+08 | 2.73E+08 | 2.84E+08 | 1.42E+08 | 89900000 | 2.36E+08 | 4.59E+08 |
| 80300000 | 6.10E+07 | 1.64E+08 | 1.80E+08 | 2.14E+08 | 72900000 | 62300000 | 1.09E+08 | 1.97E+08 |
| 1.15E+08 | 1.04E+08 | 1.98E+08 | 1.32E+08 | 3.28E+08 | 99600000 | 77900000 | 1.93E+08 | 2.29E+08 |
| 1.34E+08 | 1.72E+08 | 2.19E+08 | 1.68E+08 | 3.80E+08 | 81100000 | 71100000 | 1.99E+08 | 3.89E+08 |
| 3737300  | 0        | 10700000 | 0        | 6468000  | 0        | 0        | 0        | 4.70E+07 |
| 1.11E+08 | 1.25E+08 | 3.16E+08 | 2.52E+08 | 4.00E+08 | 1.25E+08 | 73700000 | 2.58E+08 | 4.02E+08 |
| 1.90E+08 | 2.11E+08 | 4.77E+08 | 4.19E+08 | 5.80E+08 | 1.77E+08 | 1.49E+08 | 3.54E+08 | 5.93E+08 |
| 2.28E+08 | 1.53E+08 | 2.75E+08 | 2.40E+08 | 4.16E+08 | 1.84E+08 | 1.22E+08 | 3.52E+08 | 3.88E+08 |
| 6.69E+08 | 7.63E+08 | 1.62E+09 | 1.31E+09 | 1.91E+09 | 9.40E+08 | 4.58E+08 | 1.56E+09 | 1.54E+09 |
| 95400000 | 96400000 | 1.98E+08 | 1.90E+08 | 2.56E+08 | 93800000 | 7.00E+07 | 1.48E+08 | 2.75E+08 |
| 34600000 | 37700000 | 82200000 | 88200000 | 1.18E+08 | 53500000 | 21800000 | 71400000 | 1.22E+08 |
| 61500000 | 64100000 | 1.51E+08 | 1.35E+08 | 1.66E+08 | 67100000 | 46100000 | 1.29E+08 | 2.00E+08 |
| 34900000 | 26700000 | 69800000 | 52800000 | 89700000 | 28800000 | 2.00E+07 | 6.60E+07 | 68500000 |
| 73900000 | 47500000 | 1.12E+08 | 93400000 | 1.63E+08 | 67800000 | 4.30E+07 | 1.09E+08 | 1.57E+08 |
| 1.05E+08 | 1.41E+08 | 1.94E+08 | 2.45E+08 | 4.08E+08 | 94400000 | 53600000 | 2.82E+08 | 2.44E+08 |
| 67300000 | 6.40E+07 | 1.55E+08 | 1.45E+08 | 1.93E+08 | 64200000 | 50100000 | 1.21E+08 | 2.25E+08 |
| 1.30E+08 | 1.49E+08 | 2.82E+08 | 2.49E+08 | 4.29E+08 | 1.31E+08 | 85700000 | 2.32E+08 | 3.64E+08 |
| 1.28E+08 | 1.63E+08 | 2.08E+08 | 1.94E+08 | 2.55E+08 | 91300000 | 67400000 | 1.85E+08 | 3.88E+08 |
| 57500000 | 45500000 | 1.24E+08 | 1.24E+08 | 2.06E+08 | 49600000 | 50800000 | 1.67E+08 | 2.92E+08 |
| 0        | 7085400  | 2190500  | 17900000 | 0        | 1118500  | 4106300  | 0        | 61300000 |
| 9.00E+08 | 9.80E+08 | 1.76E+09 | 1.66E+09 | 2.35E+09 | 9.21E+08 | 6.17E+08 | 1.80E+09 | 2.12E+09 |
| 97700000 | 70100000 | 1.36E+08 | 1.61E+08 | 2.87E+08 | 81500000 | 80500000 | 1.74E+08 | 2.88E+08 |
| 1.25E+08 | 1.31E+08 | 3.16E+08 | 2.86E+08 | 4.45E+08 | 1.52E+08 | 1.17E+08 | 2.92E+08 | 4.90E+08 |
| 1.11E+08 | 9.10E+07 | 2.64E+08 | 2.29E+08 | 3.32E+08 | 1.20E+08 | 81800000 | 1.99E+08 | 3.73E+08 |
| 0        | 0        | 0        | 0        | 203830   | 6529200  | 0        | 0        | 0        |
| 23900000 | 2.30E+07 | 30900000 | 43700000 | 7.80E+07 | 15900000 | 12400000 | 50600000 | 67700000 |
| 2.72E+08 | 4.10E+08 | 6.71E+08 | 8.58E+08 | 6.86E+08 | 6.87E+08 | 1.91E+08 | 1.20E+09 | 5.81E+08 |
| 74400000 | 1.39E+08 | 3.12E+08 | 2.56E+08 | 4.51E+08 | 1.18E+08 | 81900000 | 2.46E+08 | 3.74E+08 |
| 24300000 | 29200000 | 38200000 | 54900000 | 80600000 | 20200000 | 29500000 | 4.30E+07 | 9.90E+07 |
| 1.04E+08 | 1.18E+08 | 2.05E+08 | 1.98E+08 | 2.78E+08 | 89100000 | 82600000 | 2.02E+08 | 3.03E+08 |
| 7.40E+07 | 51500000 | 1.05E+08 | 1.11E+08 | 1.35E+08 | 43400000 | 42300000 | 98200000 | 1.26E+08 |
| 6098400  | 9877000  | 367710   | 8552100  | 33200000 | 275290   | 882730   | 14400000 | 10100000 |
| 1.16E+08 | 84600000 | 1.61E+08 | 1.75E+08 | 2.52E+08 | 87100000 | 45700000 | 1.59E+08 | 3.50E+08 |
| 30400000 | 26100000 | 46300000 | 57100000 | 75800000 | 3.10E+07 | 16800000 | 3.30E+07 | 6.70E+07 |
| 24600000 | 2.40E+07 | 5.60E+07 | 52100000 | 98300000 | 23400000 | 15600000 | 44300000 | 78500000 |
| 20700000 | 27100000 | 44800000 | 38700000 | 5.10E+07 | 17100000 | 19500000 | 62700000 | 55200000 |
| 1.02E+08 | 63300000 | 2.06E+08 | 1.59E+08 | 2.83E+08 | 92800000 | 42300000 | 2.16E+08 | 2.99E+08 |
| 31500000 | 45900000 | 85600000 | 40100000 | 7.10E+07 | 38300000 | 22600000 | 39900000 | 9.70E+07 |
| 1.08E+08 | 1.23E+08 | 2.51E+08 | 1.10E+08 | 2.67E+08 | 1.16E+08 | 84800000 | 1.89E+08 | 2.60E+08 |
| 9788600  | 18700000 | 29400000 | 27200000 | 35200000 | 14700000 | 21100000 | 14900000 | 56900000 |
| 4980900  | 5123700  | 26300000 | 14800000 | 49400000 | 4665500  | 4945600  | 16200000 | 48500000 |

|          |          |          |          |          |          |          |          |          |
|----------|----------|----------|----------|----------|----------|----------|----------|----------|
| 24900000 | 25800000 | 83700000 | 1.17E+08 | 1.56E+08 | 28100000 | 33100000 | 90500000 | 1.54E+08 |
| 14200000 | 17500000 | 2.60E+07 | 20600000 | 45300000 | 14900000 | 14700000 | 36700000 | 46100000 |
| 59200000 | 49200000 | 1.37E+08 | 1.09E+08 | 1.73E+08 | 6.30E+07 | 30100000 | 89800000 | 1.97E+08 |
| 14800000 | 18500000 | 43500000 | 39700000 | 45500000 | 22100000 | 15400000 | 27700000 | 59500000 |
| 16500000 | 11800000 | 36600000 | 31400000 | 40400000 | 11600000 | 13600000 | 9148000  | 42300000 |
| 58800000 | 62900000 | 92100000 | 93900000 | 1.92E+08 | 5.00E+07 | 36100000 | 89700000 | 1.51E+08 |
| 16700000 | 20500000 | 45500000 | 16100000 | 60500000 | 30200000 | 14400000 | 50100000 | 5.80E+07 |
| 1.17E+08 | 2.04E+08 | 3.12E+08 | 2.22E+08 | 5.58E+08 | 1.76E+08 | 1.77E+08 | 4.17E+08 | 5.11E+08 |
| 18900000 | 19400000 | 74800000 | 23100000 | 64600000 | 29500000 | 27600000 | 27700000 | 44300000 |
| 0        | 0        | 0        | 3222300  | 14600000 | 0        | 7961500  | 6092400  | 11100000 |
| 2.82E+08 | 2.56E+08 | 4.40E+08 | 5.31E+08 | 2.40E+08 | 1.16E+08 | 2.17E+08 | 4.80E+08 | 4.97E+08 |
| 50600000 | 46400000 | 87300000 | 57200000 | 1.24E+08 | 35700000 | 30500000 | 4.00E+07 | 1.14E+08 |
| 1.12E+08 | 91200000 | 2.29E+08 | 2.16E+08 | 2.37E+08 | 90100000 | 78700000 | 1.89E+08 | 2.94E+08 |
| 22100000 | 1.30E+07 | 36400000 | 23900000 | 58100000 | 10500000 | 12300000 | 36300000 | 3.30E+07 |
| 1.16E+08 | 1.24E+08 | 1.84E+08 | 1.93E+08 | 2.62E+08 | 1.15E+08 | 76300000 | 1.67E+08 | 3.56E+08 |
| 1.14E+08 | 1.19E+08 | 2.96E+08 | 2.40E+08 | 3.23E+08 | 80200000 | 78400000 | 1.56E+08 | 4.13E+08 |
| 65900000 | 74700000 | 1.23E+08 | 95300000 | 1.00E+08 | 40100000 | 35200000 | 62300000 | 1.81E+08 |
| 1.14E+08 | 83900000 | 1.42E+08 | 1.06E+08 | 2.13E+08 | 70900000 | 42100000 | 1.36E+08 | 1.92E+08 |
| 6.30E+07 | 63500000 | 1.34E+08 | 1.05E+08 | 1.97E+08 | 55800000 | 37200000 | 1.21E+08 | 1.41E+08 |
| 88300000 | 86900000 | 2.39E+08 | 2.48E+08 | 3.09E+08 | 98400000 | 68400000 | 1.66E+08 | 3.39E+08 |
| 0        | 2911100  | 2.20E+07 | 5355200  | 0        | 9723400  | 1201900  | 2485700  | 22500000 |
| 0        | 1355500  | 0        | 0        | 0        | 0        | 0        | 0        | 2.54E+08 |
| 12800000 | 2.40E+07 | 5.20E+07 | 52900000 | 89900000 | 18700000 | 16500000 | 31100000 | 69300000 |
| 47300000 | 58500000 | 65300000 | 75400000 | 1.43E+08 | 41400000 | 22100000 | 69300000 | 1.44E+08 |
| 41400000 | 38500000 | 45200000 | 48500000 | 67100000 | 21700000 | 26300000 | 4.50E+07 | 95600000 |
| 18300000 | 22500000 | 33200000 | 25500000 | 39300000 | 9580800  | 2349900  | 39400000 | 40500000 |
| 91200000 | 96400000 | 2.11E+08 | 1.86E+08 | 2.81E+08 | 86900000 | 6.10E+07 | 1.99E+08 | 3.05E+08 |
| 53900000 | 69500000 | 1.76E+08 | 1.78E+08 | 2.29E+08 | 69600000 | 42800000 | 1.63E+08 | 3.17E+08 |
| 35300000 | 25700000 | 61900000 | 79200000 | 1.11E+08 | 45400000 | 24100000 | 67300000 | 1.11E+08 |
| 12200000 | 1.10E+07 | 55800000 | 31500000 | 60900000 | 10500000 | 11700000 | 57800000 | 76500000 |
| 65300000 | 59500000 | 1.35E+08 | 9.00E+07 | 1.60E+08 | 62200000 | 45400000 | 1.13E+08 | 1.68E+08 |
| 4.20E+07 | 7.90E+07 | 58400000 | 1.23E+08 | 2.02E+08 | 47600000 | 5.70E+07 | 60500000 | 1.72E+08 |
| 1.40E+07 | 13400000 | 15600000 | 9742600  | 4.30E+07 | 11800000 | 7843300  | 6881000  | 4.70E+07 |
| 16500000 | 29500000 | 44300000 | 21600000 | 36300000 | 14600000 | 13900000 | 36100000 | 54800000 |
| 3.50E+07 | 24400000 | 54100000 | 72300000 | 56600000 | 19700000 | 12400000 | 47400000 | 72100000 |
| 11300000 | 6005000  | 13500000 | 14100000 | 13800000 | 3915700  | 3881600  | 16200000 | 11800000 |
| 27100000 | 20700000 | 51500000 | 46200000 | 68600000 | 32800000 | 19700000 | 31300000 | 92100000 |
| 27600000 | 31800000 | 50600000 | 45900000 | 52800000 | 27400000 | 18400000 | 51900000 | 68900000 |
| 9686400  | 11900000 | 76200000 | 52200000 | 75400000 | 14400000 | 11400000 | 30700000 | 81600000 |
| 1.72E+08 | 1.11E+08 | 1.74E+08 | 1.45E+08 | 2.48E+08 | 1.47E+08 | 42100000 | 1.72E+08 | 2.75E+08 |
| 26700000 | 19400000 | 1.05E+08 | 63800000 | 1.06E+08 | 9872000  | 29800000 | 2.50E+07 | 1.31E+08 |
| 7395200  | 14600000 | 13500000 | 17600000 | 16800000 | 5245400  | 9549200  | 1478300  | 40600000 |
| 0        | 519020   | 2489800  | 2561900  | 0        | 49300000 | 0        | 0        | 0        |
| 4.30E+07 | 56400000 | 58500000 | 94800000 | 1.15E+08 | 54400000 | 31500000 | 8.90E+07 | 1.53E+08 |
| 7044600  | 7398300  | 27700000 | 23800000 | 51700000 | 10700000 | 11600000 | 17200000 | 54700000 |
| 15100000 | 11200000 | 27200000 | 23700000 | 53900000 | 9771000  | 8433000  | 19800000 | 40800000 |
| 2848900  | 5898800  | 10700000 | 0        | 28500000 | 0        | 1572400  | 0        | 25200000 |



|          |          |          |          |          |          |          |          |          |
|----------|----------|----------|----------|----------|----------|----------|----------|----------|
| 781790   | 0        | 0        | 2622400  | 8907000  | 0        | 0        | 4457400  | 9842800  |
| 8445400  | 8573200  | 9936500  | 18600000 | 7272900  | 4628700  | 8378100  | 16100000 | 35100000 |
| 14200000 | 12700000 | 23300000 | 23600000 | 35500000 | 3487400  | 6642200  | 19100000 | 34700000 |
| 33400000 | 17800000 | 29300000 | 36400000 | 67400000 | 33800000 | 15300000 | 29700000 | 52100000 |
| 1.31E+08 | 72300000 | 1.36E+08 | 1.50E+08 | 1.98E+08 | 76900000 | 56200000 | 1.30E+08 | 1.95E+08 |
| 7027400  | 13900000 | 19800000 | 29200000 | 28400000 | 7384200  | 9035100  | 19700000 | 2.40E+07 |
| 11200000 | 15100000 | 14700000 | 16500000 | 29500000 | 9714200  | 9222500  | 20800000 | 30800000 |
| 26900000 | 23300000 | 82200000 | 7.40E+07 | 57700000 | 2.40E+07 | 19600000 | 45700000 | 1.32E+08 |
| 0        | 0        | 0        | 0        | 0        | 0        | 0        | 0        | 0        |
| 17900000 | 9225700  | 15700000 | 0        | 70900000 | 19900000 | 17800000 | 17700000 | 17700000 |
| 1.06E+08 | 1.39E+08 | 2.49E+08 | 2.37E+08 | 3.50E+08 | 1.04E+08 | 63400000 | 2.70E+08 | 4.67E+08 |
| 21800000 | 18200000 | 27600000 | 54700000 | 73700000 | 21100000 | 2.30E+07 | 38900000 | 43200000 |
| 5612600  | 2832000  | 6795100  | 7425000  | 20600000 | 6866600  | 5335100  | 8062900  | 20400000 |
| 70800000 | 88300000 | 1.07E+08 | 1.07E+08 | 3.25E+08 | 63600000 | 57300000 | 1.50E+08 | 1.80E+08 |
| 2.00E+07 | 2.30E+07 | 32400000 | 40500000 | 45900000 | 26900000 | 17700000 | 42800000 | 51500000 |
| 19800000 | 15800000 | 38500000 | 41500000 | 52400000 | 12700000 | 11500000 | 40900000 | 40200000 |
| 15500000 | 10800000 | 18700000 | 6484100  | 33800000 | 3695400  | 9023900  | 13700000 | 28200000 |
| 0        | 0        | 3667800  | 4096200  | 8144600  | 0        | 1533400  | 4157700  | 4582500  |
| 23500000 | 2.10E+07 | 69300000 | 6.50E+07 | 1.03E+08 | 25800000 | 18200000 | 39800000 | 83400000 |
| 13400000 | 19400000 | 33900000 | 21100000 | 44600000 | 8446900  | 4794600  | 2.00E+07 | 44100000 |
| 13400000 | 11800000 | 25100000 | 33900000 | 2.70E+07 | 15100000 | 10600000 | 30600000 | 51500000 |
| 77300000 | 81300000 | 1.63E+08 | 1.13E+08 | 2.39E+08 | 78300000 | 52500000 | 1.60E+08 | 1.68E+08 |
| 0        | 0        | 0        | 0        | 95800000 | 0        | 39400000 | 0        | 0        |
| 1.10E+07 | 7077800  | 4445900  | 6283000  | 9437500  | 5984600  | 2261700  | 13800000 | 9344800  |
| 8129500  | 0        | 0        | 0        | 0        | 0        | 0        | 0        | 6361700  |
| 0        | 0        | 2491300  | 0        | 0        | 1106200  | 0        | 0        | 2512500  |
| 20600000 | 16500000 | 50500000 | 56300000 | 99400000 | 23900000 | 12800000 | 29800000 | 75800000 |
| 5973700  | 8168200  | 30300000 | 26100000 | 28100000 | 11300000 | 6852900  | 17700000 | 52200000 |
| 12800000 | 18600000 | 35500000 | 41300000 | 49500000 | 19200000 | 14700000 | 3.50E+07 | 23600000 |
| 0        | 0        | 0        | 0        | 0        | 0        | 0        | 0        | 0        |
| 32400000 | 25800000 | 65900000 | 65200000 | 68500000 | 25300000 | 18200000 | 3.80E+07 | 9.30E+07 |
| 28200000 | 29900000 | 71800000 | 40100000 | 35600000 | 26800000 | 24100000 | 63300000 | 1.01E+08 |
| 15600000 | 21600000 | 45200000 | 39600000 | 40400000 | 14100000 | 11200000 | 23200000 | 40900000 |
| 43200000 | 26800000 | 53800000 | 53500000 | 69500000 | 19400000 | 21400000 | 40200000 | 77800000 |
| 34100000 | 36200000 | 38600000 | 17900000 | 35800000 | 14700000 | 8490300  | 3.60E+07 | 45900000 |
| 16200000 | 18900000 | 22100000 | 22400000 | 22500000 | 11700000 | 7127600  | 21800000 | 36700000 |
| 3561700  | 11100000 | 34900000 | 27400000 | 32500000 | 10700000 | 11800000 | 7901600  | 29300000 |
| 4115000  | 6704200  | 12200000 | 16100000 | 22100000 | 4672400  | 5799000  | 1.30E+07 | 14500000 |
| 7415900  | 17800000 | 26600000 | 23300000 | 25200000 | 11900000 | 7779300  | 24900000 | 24200000 |
| 12400000 | 14100000 | 41600000 | 24700000 | 36200000 | 16500000 | 8929000  | 16400000 | 42700000 |
| 16100000 | 15600000 | 2.50E+07 | 63400000 | 81100000 | 16600000 | 32100000 | 29200000 | 75700000 |
| 12500000 | 11800000 | 21900000 | 1.60E+07 | 30200000 | 1.20E+07 | 7451800  | 34300000 | 29300000 |
| 4458200  | 5123400  | 22600000 | 11300000 | 24300000 | 0        | 5268000  | 1.30E+07 | 32100000 |
| 1.79E+08 | 2.17E+08 | 1.62E+08 | 2.50E+08 | 1.38E+08 | 7.40E+07 | 91300000 | 1.85E+08 | 1.23E+08 |
| 11800000 | 19200000 | 32400000 | 27700000 | 8562500  | 11300000 | 7609100  | 1.30E+07 | 55700000 |
| 6142900  | 6662900  | 26200000 | 23800000 | 55600000 | 6705300  | 7310300  | 14800000 | 4.10E+07 |
| 0        | 2144200  | 0        | 0        | 0        | 0        | 0        | 5846200  | 0        |

|          |          |          |          |          |          |          |          |          |
|----------|----------|----------|----------|----------|----------|----------|----------|----------|
| 18900000 | 1.70E+07 | 21900000 | 17800000 | 45800000 | 6749500  | 7201600  | 2.70E+07 | 28500000 |
| 2.60E+07 | 35600000 | 55300000 | 48900000 | 76400000 | 23500000 | 21600000 | 49900000 | 1.01E+08 |
| 5814100  | 22600000 | 50800000 | 44700000 | 81300000 | 23300000 | 11200000 | 31600000 | 78600000 |
| 0        | 5674800  | 16100000 | 21300000 | 0        | 3721800  | 6103800  | 0        | 25500000 |
| 24500000 | 15200000 | 54100000 | 47500000 | 86900000 | 17800000 | 18800000 | 27600000 | 1.05E+08 |
| 12800000 | 7254300  | 23700000 | 26100000 | 27400000 | 9324600  | 6920000  | 26300000 | 31300000 |
| 866340   | 0        | 8012900  | 7216400  | 13700000 | 879370   | 518560   | 5459900  | 10800000 |
| 55900000 | 49900000 | 96300000 | 1.22E+08 | 2.20E+08 | 54800000 | 26600000 | 1.24E+08 | 1.98E+08 |
| 19900000 | 2.60E+07 | 55700000 | 25700000 | 2.60E+07 | 20700000 | 14500000 | 30400000 | 86200000 |
| 1384400  | 7686800  | 24400000 | 8200800  | 20500000 | 4020300  | 3306300  | 19300000 | 26900000 |
| 8923600  | 7258000  | 12900000 | 10900000 | 23400000 | 6536600  | 5502700  | 12900000 | 17900000 |
| 9357500  | 15300000 | 30200000 | 35100000 | 44400000 | 9286100  | 4022900  | 22500000 | 6.20E+07 |
| 0        | 0        | 0        | 0        | 0        | 0        | 0        | 0        | 0        |
| 54300000 | 45100000 | 94600000 | 1.23E+08 | 1.76E+08 | 6.70E+07 | 43700000 | 1.03E+08 | 1.64E+08 |
| 8976000  | 9839100  | 9476800  | 0        | 18700000 | 9957300  | 4498100  | 18300000 | 26500000 |
| 14300000 | 6284600  | 24600000 | 5246900  | 29900000 | 13600000 | 1.00E+07 | 8085400  | 31700000 |
| 13700000 | 5028800  | 34500000 | 2.40E+07 | 40500000 | 7522500  | 7903700  | 19100000 | 43900000 |
| 7806500  | 14900000 | 14200000 | 12400000 | 29600000 | 7167900  | 3255600  | 12100000 | 30900000 |
| 7138800  | 27200000 | 62500000 | 49700000 | 67300000 | 13600000 | 8715000  | 36600000 | 85800000 |
| 51600000 | 50900000 | 1.45E+08 | 1.03E+08 | 1.72E+08 | 49600000 | 33200000 | 97600000 | 1.75E+08 |
| 44800000 | 59400000 | 1.11E+08 | 1.47E+08 | 1.45E+08 | 70400000 | 35600000 | 1.25E+08 | 1.46E+08 |
| 60700000 | 33700000 | 1.27E+08 | 1.17E+08 | 1.77E+08 | 65600000 | 24200000 | 1.22E+08 | 1.93E+08 |
| 1.20E+08 | 2.68E+08 | 9.35E+08 | 7.20E+08 | 4.95E+08 | 4.40E+08 | 2.19E+08 | 3.81E+08 | 1.32E+09 |
| 16700000 | 20500000 | 68100000 | 93200000 | 99500000 | 20900000 | 16300000 | 52700000 | 1.23E+08 |
| 25500000 | 27500000 | 45700000 | 51800000 | 65200000 | 11600000 | 11800000 | 45200000 | 72800000 |
| 1205800  | 15500000 | 50700000 | 38200000 | 37100000 | 21200000 | 19700000 | 23200000 | 33300000 |
| 0        | 2095500  | 0        | 2379500  | 0        | 1540400  | 0        | 2142000  | 0        |
| 18600000 | 24300000 | 3880400  | 18800000 | 32200000 | 13200000 | 1.40E+07 | 37800000 | 21900000 |
| 13900000 | 8940500  | 25100000 | 23800000 | 47300000 | 6154100  | 4349900  | 13300000 | 35300000 |
| 0        | 13500000 | 1147600  | 0        | 0        | 0        | 0        | 46900000 | 213850   |
| 6825100  | 10800000 | 14500000 | 1.30E+07 | 24700000 | 4624700  | 5568400  | 14400000 | 26200000 |
| 26200000 | 22600000 | 30100000 | 24900000 | 57300000 | 2.60E+07 | 1.20E+07 | 44200000 | 47100000 |
| 0        | 0        | 0        | 0        | 0        | 18800000 | 0        | 0        | 0        |
| 0        | 0        | 11700000 | 2780200  | 0        | 0        | 1094500  | 2461000  | 0        |
| 6091200  | 8195300  | 28200000 | 29100000 | 32400000 | 2720900  | 6150600  | 14500000 | 96900000 |
| 16100000 | 26100000 | 42600000 | 52300000 | 57800000 | 20400000 | 10500000 | 48100000 | 53200000 |
| 15700000 | 17600000 | 33300000 | 28600000 | 4.00E+07 | 14500000 | 14100000 | 23800000 | 51800000 |
| 14500000 | 11800000 | 21200000 | 20800000 | 52700000 | 8977200  | 8646300  | 29300000 | 40300000 |
| 3337000  | 2251900  | 2123100  | 6926600  | 16200000 | 2436700  | 3251900  | 6006100  | 5962100  |
| 15900000 | 10600000 | 15700000 | 27600000 | 3.00E+07 | 12200000 | 12100000 | 16200000 | 19100000 |
| 4.50E+07 | 14400000 | 80900000 | 78900000 | 1.31E+08 | 39200000 | 1859400  | 83200000 | 1.24E+08 |
| 14400000 | 8874000  | 24800000 | 17600000 | 22700000 | 5305700  | 8333700  | 14300000 | 51800000 |
| 33500000 | 36800000 | 56100000 | 41100000 | 76700000 | 29900000 | 16100000 | 37100000 | 7.50E+07 |
| 1.30E+07 | 14900000 | 23500000 | 26400000 | 2.90E+07 | 13100000 | 10900000 | 19100000 | 27900000 |
| 0        | 0        | 4885000  | 0        | 0        | 8981500  | 0        | 0        | 23700000 |
| 51700000 | 3.40E+07 | 9.80E+07 | 83100000 | 1.12E+08 | 41300000 | 38800000 | 74700000 | 70400000 |
| 7164100  | 11900000 | 27300000 | 39900000 | 3.30E+07 | 1.20E+07 | 8681500  | 25100000 | 4.80E+07 |

|          |          |          |          |          |          |          |          |          |
|----------|----------|----------|----------|----------|----------|----------|----------|----------|
| 5845100  | 1957300  | 3017800  | 3110200  | 8352500  | 1975700  | 804400   | 6683700  | 4934300  |
| 15200000 | 9207200  | 2.20E+07 | 21200000 | 30300000 | 7888900  | 8157400  | 29500000 | 34300000 |
| 0        | 0        | 0        | 0        | 0        | 0        | 1437400  | 8871900  | 0        |
| 3829000  | 4609200  | 9534000  | 7074600  | 11700000 | 2738900  | 1501700  | 5299800  | 11700000 |
| 41200000 | 42400000 | 1.20E+07 | 15300000 | 2.10E+08 | 8116300  | 26900000 | 12900000 | 32800000 |
| 1579800  | 4962900  | 15200000 | 13900000 | 1.60E+07 | 7828800  | 4550900  | 5507600  | 20800000 |
| 1415300  | 0        | 0        | 0        | 0        | 0        | 0        | 0        | 0        |
| 0        | 0        | 0        | 0        | 0        | 0        | 0        | 0        | 0        |
| 2840700  | 1707600  | 0        | 0        | 0        | 1677800  | 1498100  | 0        | 4573000  |
| 1.94E+09 | 3.43E+09 | 6.42E+09 | 6.09E+09 | 8.11E+09 | 2.83E+09 | 2.31E+09 | 2.84E+09 | 8.33E+09 |
| 22800000 | 22300000 | 37700000 | 39200000 | 50500000 | 18800000 | 11400000 | 34700000 | 43700000 |
| 8500400  | 6447200  | 7555100  | 12600000 | 8885700  | 1088500  | 3958500  | 16100000 | 1.50E+07 |
| 2235800  | 1733800  | 4114000  | 1646000  | 4739500  | 1791500  | 1190600  | 1781500  | 48400000 |
| 13600000 | 17200000 | 10300000 | 21800000 | 10800000 | 11700000 | 7449700  | 18500000 | 2.90E+07 |
| 7337800  | 7931700  | 24100000 | 12300000 | 33900000 | 9672500  | 5019200  | 22900000 | 35600000 |
| 4483900  | 15400000 | 4640200  | 12700000 | 17600000 | 8431100  | 11700000 | 22200000 | 1.90E+07 |
| 625720   | 0        | 7825800  | 7653300  | 10200000 | 0        | 0        | 0        | 12700000 |
| 1825700  | 5784100  | 14300000 | 6335000  | 8991600  | 5878400  | 3805400  | 7746100  | 27100000 |
| 7868300  | 8485400  | 1.50E+07 | 21600000 | 18800000 | 9339500  | 7438400  | 14700000 | 20800000 |
| 6481200  | 8641500  | 11600000 | 11600000 | 16300000 | 5285800  | 2366000  | 12500000 | 20300000 |
| 7455800  | 3472600  | 1.30E+07 | 1.40E+07 | 2793700  | 10400000 | 4194500  | 13600000 | 15800000 |
| 3051000  | 4014000  | 6905400  | 7269300  | 10900000 | 2403200  | 1891700  | 6028200  | 9292400  |
| 5021200  | 11100000 | 0        | 15700000 | 19800000 | 6670000  | 851620   | 6131000  | 26900000 |
| 0        | 7112900  | 0        | 28800000 | 0        | 3251300  | 9221600  | 1089000  | 3.30E+07 |
| 7333600  | 2246200  | 4477700  | 5060300  | 16200000 | 1582500  | 1872100  | 12600000 | 17800000 |
| 38400000 | 32100000 | 1.42E+08 | 82200000 | 1.83E+08 | 56300000 | 44300000 | 81600000 | 2.19E+08 |
| 8467200  | 8195300  | 11600000 | 14700000 | 24500000 | 6857900  | 6735000  | 8459900  | 21800000 |
| 8693500  | 3369900  | 14900000 | 2.20E+07 | 27100000 | 6320900  | 0        | 1090800  | 23800000 |
| 6674800  | 9447600  | 24600000 | 16600000 | 1254900  | 9734400  | 6056500  | 15400000 | 3.10E+07 |
| 2733900  | 2128100  | 3721000  | 8084200  | 13400000 | 1631700  | 320450   | 4253700  | 4428700  |
| 0        | 0        | 0        | 0        | 0        | 0        | 0        | 2917300  | 0        |
| 17200000 | 3113200  | 0        | 4864500  | 0        | 0        | 858610   | 0        | 0        |
| 10900000 | 7601900  | 33100000 | 29500000 | 48500000 | 12400000 | 4376300  | 32900000 | 50600000 |
| 7618500  | 2486000  | 15900000 | 12700000 | 11100000 | 6249300  | 2374900  | 12500000 | 10800000 |
| 6346500  | 5557700  | 9382200  | 6964700  | 11900000 | 5501900  | 2253000  | 9546300  | 2.00E+07 |
| 583940   | 5568600  | 2599000  | 2336200  | 6371000  | 4360200  | 1036400  | 8130800  | 20200000 |
| 4566400  | 6068200  | 8469700  | 4303900  | 3731100  | 3033100  | 1480700  | 3633700  | 13600000 |
| 0        | 0        | 0        | 0        | 0        | 0        | 0        | 0        | 0        |
| 0        | 1826900  | 0        | 0        | 930860   | 2616100  | 0        | 5965200  | 0        |
| 9322600  | 7890700  | 10800000 | 1.10E+07 | 12900000 | 4619800  | 4346300  | 12400000 | 11700000 |
| 2201200  | 2983000  | 15900000 | 4506800  | 15600000 | 2528000  | 2413200  | 4920400  | 19200000 |
| 2803400  | 6831500  | 6506100  | 6166300  | 8350600  | 3104300  | 4126200  | 12500000 | 11100000 |
| 7776400  | 3859900  | 4574500  | 14500000 | 15200000 | 0        | 4481900  | 11600000 | 18600000 |
| 0        | 0        | 0        | 0        | 0        | 0        | 0        | 0        | 0        |
| 5366300  | 2771900  | 4536000  | 4442600  | 11200000 | 4972800  | 2096300  | 6966200  | 14100000 |
| 10900000 | 10600000 | 8531000  | 13400000 | 41900000 | 0        | 12900000 | 10100000 | 34400000 |
| 5521400  | 6095100  | 9589300  | 1.00E+07 | 12500000 | 5145200  | 2372300  | 10600000 | 16900000 |

|          |          |          |          |          |          |          |          |          |
|----------|----------|----------|----------|----------|----------|----------|----------|----------|
| 8506000  | 18200000 | 14800000 | 1.30E+07 | 40500000 | 7553300  | 2727000  | 21500000 | 52100000 |
| 31400000 | 29300000 | 49200000 | 57500000 | 95900000 | 29100000 | 22200000 | 44100000 | 86500000 |
| 20300000 | 22900000 | 32900000 | 4.00E+07 | 5.40E+07 | 13500000 | 15200000 | 33800000 | 40500000 |
| 2113600  | 2212200  | 0        | 0        | 0        | 2586600  | 2224900  | 6960400  | 1595800  |
| 2088000  | 5584400  | 8625800  | 16500000 | 19700000 | 16600000 | 4801500  | 13300000 | 2.00E+07 |
| 0        | 0        | 0        | 0        | 0        | 0        | 0        | 0        | 0        |
| 9001300  | 6447600  | 20200000 | 14200000 | 18100000 | 8779800  | 3751200  | 17900000 | 2.70E+07 |
| 0        | 1166900  | 3024400  | 3568600  | 2.00E+07 | 0        | 1349400  | 0        | 0        |
| 8308500  | 3039200  | 10600000 | 16700000 | 17600000 | 3774400  | 4782900  | 5908300  | 11400000 |
| 6039800  | 8860800  | 11300000 | 12200000 | 20800000 | 3889900  | 0        | 7272800  | 1.20E+07 |
| 0        | 1575600  | 0        | 3580100  | 13900000 | 0        | 0        | 0        | 10500000 |
| 3615800  | 5579300  | 11200000 | 8447200  | 17300000 | 0        | 3953800  | 8476400  | 22800000 |
| 0        | 0        | 0        | 0        | 0        | 0        | 0        | 0        | 0        |
| 11100000 | 4694500  | 0        | 1247000  | 11100000 | 4816500  | 0        | 13600000 | 13700000 |
| 6458400  | 6127600  | 12800000 | 8516000  | 10600000 | 5418400  | 4643200  | 6021000  | 19400000 |
| 0        | 0        | 0        | 0        | 0        | 0        | 0        | 0        | 0        |
| 477070   | 587130   | 798110   | 1093600  | 811310   | 807000   | 722920   | 895530   | 710620   |
| 7498400  | 10200000 | 4025500  | 4393400  | 11700000 | 3575300  | 1819800  | 3935800  | 13200000 |
| 1555500  | 0        | 8950600  | 7035900  | 16100000 | 0        | 1124100  | 2681200  | 19300000 |
| 25300000 | 8455400  | 28300000 | 11800000 | 3.90E+07 | 16200000 | 11600000 | 13700000 | 3.00E+07 |
| 2695600  | 2016900  | 5557400  | 5573900  | 6733800  | 0        | 705190   | 4617300  | 18500000 |
| 4533900  | 9870800  | 17500000 | 18500000 | 37800000 | 9897500  | 5999100  | 13800000 | 19800000 |
| 19600000 | 16500000 | 29800000 | 28900000 | 3.30E+07 | 15200000 | 9120300  | 30100000 | 47400000 |
| 5206300  | 4141600  | 4266600  | 6105400  | 11700000 | 2556000  | 1578400  | 5423700  | 7910600  |
| 3311100  | 2879200  | 2671800  | 4161900  | 16100000 | 1747200  | 2016200  | 5439800  | 13400000 |
| 0        | 6440000  | 3661300  | 9836300  | 19900000 | 2063600  | 4088000  | 11800000 | 21400000 |
| 1698800  | 3222400  | 5915800  | 5064800  | 6914200  | 2764500  | 2921800  | 11100000 | 11400000 |
| 16100000 | 15100000 | 2043300  | 10300000 | 16900000 | 7990100  | 1.00E+07 | 27100000 | 0        |
| 0        | 0        | 26300000 | 12100000 | 34400000 | 6686600  | 2429600  | 4566900  | 24400000 |
| 9527300  | 6403500  | 3760100  | 3394100  | 3270200  | 1933100  | 874000   | 1434300  | 3441500  |
| 23300000 | 17200000 | 29700000 | 26500000 | 46100000 | 19700000 | 12100000 | 34900000 | 6.20E+07 |
| 12300000 | 13100000 | 32100000 | 39800000 | 50400000 | 1.80E+07 | 16100000 | 28100000 | 5.50E+07 |
| 4342700  | 3052500  | 9223900  | 2370500  | 25700000 | 1424800  | 7482900  | 3517700  | 12800000 |
| 5128600  | 6635800  | 0        | 0        | 5137100  | 3243700  | 2179100  | 8843500  | 1.60E+07 |
| 268970   | 1742300  | 0        | 0        | 599700   | 1348300  | 2440000  | 5410100  | 0        |
| 20800000 | 23400000 | 46300000 | 30600000 | 41500000 | 26200000 | 11300000 | 50500000 | 42200000 |
| 0        | 0        | 0        | 0        | 0        | 0        | 0        | 0        | 0        |
| 4174100  | 3679400  | 4862100  | 13100000 | 9260200  | 2912100  | 1741900  | 5757800  | 9410000  |
| 21800000 | 20900000 | 37500000 | 3.40E+07 | 51300000 | 18200000 | 1.20E+07 | 30500000 | 53500000 |
| 0        | 0        | 27100000 | 28200000 | 42300000 | 15300000 | 9864900  | 29700000 | 49700000 |
| 2874100  | 9171500  | 6798800  | 5897800  | 11300000 | 5695000  | 1258200  | 12200000 | 13200000 |
| 7497000  | 4708100  | 16700000 | 12400000 | 8521100  | 6429300  | 6440900  | 9913300  | 28700000 |
| 35600000 | 38400000 | 1.09E+08 | 92500000 | 1.66E+08 | 50200000 | 24700000 | 93900000 | 2.55E+08 |
| 6107700  | 20500000 | 16500000 | 19800000 | 35900000 | 10400000 | 6571600  | 1.70E+07 | 18600000 |
| 57400000 | 2197700  | 8471600  | 5474800  | 0        | 4838700  | 1941400  | 0        | 3879700  |
| 0        | 0        | 0        | 0        | 1979500  | 0        | 0        | 0        | 1852800  |
| 3564400  | 2802300  | 7807600  | 10900000 | 17100000 | 3291400  | 2065700  | 7041800  | 1.90E+07 |

|          |          |          |          |          |          |          |          |          |
|----------|----------|----------|----------|----------|----------|----------|----------|----------|
| 11400000 | 663280   | 9082600  | 16700000 | 1637400  | 1427200  | 3697600  | 1010200  | 12400000 |
| 2653300  | 3714600  | 2208800  | 7794400  | 2983200  | 2251200  | 5888000  | 7269700  | 14200000 |
| 6930800  | 6519000  | 3560300  | 17200000 | 5553200  | 6337700  | 1776400  | 0        | 26100000 |
| 745720   | 0        | 1565900  | 0        | 7919300  | 2432200  | 0        | 2691100  | 5371800  |
| 3616700  | 3233600  | 8372700  | 7952500  | 11500000 | 537520   | 2432800  | 6888700  | 10300000 |
| 3433800  | 2497600  | 9699600  | 16200000 | 1.70E+07 | 5503300  | 3452500  | 4696500  | 20900000 |
| 2109000  | 13100000 | 1702200  | 22900000 | 1912400  | 13400000 | 622870   | 25800000 | 37700000 |
| 2982500  | 4518800  | 3131200  | 3199700  | 5094300  | 3410000  | 5074700  | 9011000  | 4730800  |
| 0        | 0        | 0        | 2398800  | 0        | 0        | 0        | 0        | 0        |
| 2988900  | 0        | 0        | 2604800  | 4081900  | 0        | 700010   | 0        | 3122000  |
| 3876800  | 1686300  | 0        | 0        | 0        | 838970   | 983060   | 1421300  | 5069100  |
| 0        | 0        | 0        | 0        | 0        | 0        | 0        | 0        | 0        |
| 0        | 5849800  | 9443000  | 0        | 14500000 | 4779500  | 3996600  | 0        | 14500000 |
| 4649700  | 8200600  | 2.10E+07 | 5738500  | 13900000 | 1.00E+07 | 2385800  | 8073600  | 30300000 |
| 7003100  | 1471800  | 3306000  | 3314300  | 13100000 | 1670000  | 3655200  | 5303000  | 7044300  |
| 8014800  | 11700000 | 23100000 | 22400000 | 36600000 | 1.10E+07 | 8479200  | 22100000 | 16800000 |
| 2914200  | 6529100  | 7528600  | 0        | 33700000 | 5691100  | 2650700  | 11300000 | 2.20E+07 |
| 4775800  | 2952700  | 6234500  | 13400000 | 11100000 | 4343600  | 3657100  | 5288800  | 10600000 |
| 2341300  | 4443000  | 7714200  | 17100000 | 6651000  | 9607200  | 6560200  | 15500000 | 19100000 |
| 0        | 0        | 0        | 0        | 0        | 0        | 0        | 0        | 7853700  |
| 0        | 2774400  | 0        | 0        | 0        | 0        | 0        | 0        | 0        |
| 10600000 | 6574600  | 8796300  | 0        | 6049900  | 3852900  | 3616900  | 9126000  | 0        |
| 1596900  | 2282300  | 3144700  | 0        | 8970600  | 1710400  | 2022900  | 2759800  | 2228600  |
| 0        | 1923300  | 1839700  | 0        | 2078900  | 2435800  | 444620   | 0        | 7733900  |
| 15700000 | 17400000 | 38600000 | 23900000 | 50400000 | 11300000 | 10700000 | 30500000 | 40100000 |
| 0        | 468500   | 0        | 155380   | 0        | 652400   | 0        | 0        | 0        |
| 1399300  | 860480   | 0        | 1393700  | 1111500  | 1505600  | 876140   | 1553700  | 1761200  |
| 0        | 0        | 0        | 0        | 0        | 0        | 0        | 0        | 0        |
| 2836600  | 2434300  | 4159100  | 4566300  | 5116500  | 1894100  | 1809300  | 4385600  | 6020600  |
| 0        | 0        | 0        | 0        | 0        | 0        | 0        | 0        | 0        |
| 0        | 0        | 0        | 0        | 0        | 0        | 0        | 5837000  | 0        |
| 2116600  | 1720300  | 2934800  | 2944300  | 51400000 | 1592700  | 884230   | 4974200  | 13500000 |
| 5207200  | 1193200  | 18700000 | 1.80E+07 | 30400000 | 6004700  | 3271800  | 10500000 | 21900000 |
| 6729700  | 5323800  | 0        | 0        | 12500000 | 0        | 869550   | 9367700  | 0        |
| 0        | 0        | 7054500  | 0        | 10300000 | 0        | 2519100  | 2046300  | 0        |
| 0        | 0        | 0        | 2326500  | 0        | 0        | 3437000  | 6424500  | 2846000  |
| 5330500  | 6993200  | 9609100  | 11300000 | 8919300  | 4533000  | 2663900  | 1.20E+07 | 13300000 |
| 17400000 | 8356600  | 21100000 | 2.80E+07 | 28800000 | 5379500  | 4400600  | 18100000 | 3.10E+07 |
| 3084600  | 3059300  | 8883400  | 1.50E+07 | 1.60E+07 | 3733900  | 2354300  | 7727400  | 13400000 |
| 1811400  | 1551100  | 5954500  | 6965200  | 9033000  | 0        | 0        | 2955900  | 8500400  |
| 1625600  | 2965500  | 12500000 | 21900000 | 14800000 | 5458600  | 3282700  | 7285200  | 24500000 |
| 3411300  | 5272000  | 0        | 1548700  | 2425400  | 0        | 866870   | 8054100  | 14600000 |
| 1116600  | 2827800  | 4028400  | 2156800  | 76405    | 1567700  | 0        | 4258700  | 7767400  |
| 0        | 0        | 0        | 0        | 0        | 0        | 1203300  | 0        | 0        |
| 0        | 2394700  | 5917000  | 16100000 | 9392600  | 2117900  | 1473900  | 0        | 1.80E+07 |
| 2590000  | 4016900  | 7263600  | 11300000 | 6511200  | 2281200  | 3500500  | 3730600  | 9660200  |
| 1356400  | 905700   | 0        | 0        | 1437000  | 1361300  | 954590   | 4390400  | 2914700  |

|          |          |          |          |          |         |         |          |          |
|----------|----------|----------|----------|----------|---------|---------|----------|----------|
| 13200000 | 2588900  | 0        | 19700000 | 11100000 | 9790500 | 2194400 | 13200000 | 10700000 |
| 5366100  | 6055800  | 8010600  | 6994000  | 19700000 | 4264500 | 2789300 | 8105800  | 6282200  |
| 8636100  | 8773400  | 7954600  | 1.10E+07 | 12200000 | 8962700 | 3437400 | 17900000 | 20200000 |
| 2562400  | 2665700  | 3616800  | 3156800  | 4108600  | 1747200 | 1239000 | 3687900  | 4945600  |
| 4936700  | 11900000 | 29600000 | 30400000 | 39800000 | 3590800 | 6588700 | 2.50E+07 | 53200000 |
| 4628400  | 0        | 0        | 10300000 | 5448400  | 1534100 | 3531100 | 5425300  | 0        |
| 3228100  | 5323500  | 4910700  | 12200000 | 12200000 | 4521500 | 4209800 | 6222400  | 12400000 |
| 610580   | 1683300  | 9199900  | 0        | 10600000 | 0       | 3124100 | 9926400  | 8539800  |
| 0        | 0        | 4380600  | 0        | 0        | 0       | 0       | 0        | 0        |
| 392010   | 441920   | 1052900  | 975190   | 1917100  | 512650  | 1059000 | 1152600  | 599280   |
| 0        | 0        | 0        | 0        | 0        | 0       | 0       | 0        | 0        |
| 10100000 | 8273900  | 1.10E+07 | 12100000 | 9281000  | 2930800 | 3031300 | 4813600  | 12300000 |
| 10800000 | 9289400  | 20300000 | 18200000 | 23800000 | 7412600 | 7245600 | 16400000 | 2.10E+07 |
| 1481300  | 601380   | 3966000  | 0        | 0        | 1414300 | 0       | 0        | 0        |
| 0        | 3574400  | 0        | 4731600  | 8543400  | 693300  | 0       | 7156200  | 15300000 |
| 1889300  | 0        | 0        | 0        | 0        | 0       | 0       | 0        | 0        |
| 6086000  | 14100000 | 9509000  | 4696900  | 12300000 | 7694500 | 3780000 | 18100000 | 2.10E+07 |
| 0        | 1455100  | 0        | 3813600  | 0        | 0       | 3262700 | 0        | 3579400  |
| 5561800  | 5163500  | 27300000 | 21600000 | 36600000 | 1946100 | 0       | 11500000 | 33100000 |
| 0        | 0        | 0        | 0        | 0        | 0       | 0       | 0        | 0        |
| 8979300  | 0        | 13100000 | 9933600  | 13600000 | 2227500 | 5105300 | 7710000  | 26400000 |
| 0        | 0        | 0        | 0        | 3097200  | 0       | 0       | 0        | 0        |
| 3143000  | 708420   | 238750   | 2827000  | 414990   | 917320  | 1956100 | 2335600  | 3964500  |
| 0        | 0        | 0        | 0        | 0        | 0       | 0       | 0        | 0        |
| 5598800  | 4404700  | 8477100  | 8411500  | 0        | 1847200 | 1906700 | 0        | 12100000 |
| 3622000  | 2715900  | 3875600  | 4644100  | 6548200  | 2451300 | 2056000 | 6357100  | 7468000  |
| 1393600  | 2623300  | 6955200  | 5694700  | 8014400  | 3351900 | 4437400 | 4962400  | 13800000 |
| 2331400  | 1838900  | 3712900  | 7672400  | 4603200  | 6608000 | 3171100 | 4833500  | 7009100  |
| 1420200  | 1450000  | 2900800  | 2938300  | 2876000  | 1273200 | 1082100 | 2109200  | 4284200  |
| 0        | 5598300  | 8900400  | 4561900  | 5604200  | 0       | 1884200 | 0        | 8403900  |
| 4515400  | 9257900  | 6124500  | 5856400  | 13600000 | 3770600 | 2763000 | 6949000  | 21700000 |
| 1209600  | 349940   | 1149100  | 0        | 6073200  | 605830  | 0       | 0        | 1019000  |
| 0        | 767310   | 2492000  | 2324000  | 0        | 0       | 0       | 1710500  | 0        |
| 0        | 0        | 0        | 0        | 0        | 0       | 0       | 0        | 0        |
| 0        | 0        | 0        | 7749800  | 6123200  | 0       | 0       | 0        | 9649300  |
| 0        | 0        | 0        | 0        | 0        | 0       | 0       | 0        | 0        |
| 561590   | 2455900  | 2649400  | 0        | 4704600  | 1115000 | 1082400 | 3694800  | 4511000  |
| 0        | 0        | 0        | 0        | 0        | 0       | 0       | 0        | 0        |
| 0        | 0        | 0        | 4960200  | 0        | 758700  | 739860  | 0        | 4288600  |
| 0        | 0        | 0        | 0        | 0        | 0       | 1069400 | 0        | 0        |
| 0        | 0        | 0        | 0        | 0        | 0       | 0       | 0        | 0        |
| 4335500  | 6146800  | 7174800  | 7570300  | 9270500  | 6120500 | 4192000 | 11400000 | 13300000 |
| 2409100  | 2036800  | 3180900  | 3199300  | 5925200  | 3319100 | 0       | 3771500  | 14500000 |
| 5266600  | 4437600  | 8289100  | 8748200  | 11500000 | 2815900 | 1833100 | 8441800  | 12600000 |
| 0        | 0        | 0        | 0        | 0        | 0       | 0       | 0        | 0        |
| 1341200  | 1869800  | 2976000  | 2501200  | 4244900  | 3293200 | 1494800 | 3336000  | 5317600  |
| 1155900  | 0        | 10900000 | 10600000 | 1.80E+07 | 5171200 | 3162100 | 10600000 | 10600000 |

|          |          |          |          |          |          |         |          |          |
|----------|----------|----------|----------|----------|----------|---------|----------|----------|
| 5875600  | 4949500  | 2939000  | 9027500  | 14300000 | 2087900  | 3055200 | 16800000 | 14600000 |
| 827540   | 854790   | 1275800  | 1408800  | 1610000  | 881240   | 596730  | 1116700  | 1602700  |
| 998360   | 1085600  | 1464600  | 1879300  | 1729800  | 669860   | 572080  | 1637800  | 1804100  |
| 0        | 3222600  | 9012600  | 0        | 9984300  | 0        | 1967400 | 0        | 10700000 |
| 2078200  | 1304500  | 1.00E+07 | 7115600  | 2902000  | 0        | 977700  | 2043500  | 8195000  |
| 1768100  | 4318700  | 9163300  | 4393000  | 4489200  | 3755800  | 3082100 | 6741300  | 13900000 |
| 8398200  | 8893700  | 13200000 | 0        | 22700000 | 4374500  | 3169600 | 17300000 | 9270800  |
| 3727700  | 4700100  | 0        | 6695700  | 11800000 | 2414600  | 3049900 | 5814700  | 12300000 |
| 0        | 0        | 0        | 0        | 0        | 0        | 0       | 0        | 0        |
| 718590   | 3776400  | 1079500  | 719900   | 1181600  | 3263400  | 1476500 | 6518400  | 1462600  |
| 1309200  | 1621500  | 5616800  | 3088000  | 8524600  | 900830   | 888600  | 4317300  | 3233000  |
| 0        | 0        | 5680900  | 0        | 4202900  | 0        | 0       | 0        | 10900000 |
| 0        | 523960   | 4649500  | 0        | 0        | 836550   | 0       | 0        | 0        |
| 0        | 0        | 0        | 0        | 0        | 0        | 0       | 0        | 0        |
| 6365500  | 6018000  | 19100000 | 21200000 | 0        | 6818300  | 0       | 10900000 | 0        |
| 0        | 6814800  | 0        | 0        | 0        | 0        | 0       | 0        | 0        |
| 1531800  | 0        | 2424000  | 3301100  | 3795000  | 997280   | 1087000 | 9419300  | 9373500  |
| 0        | 5658400  | 18200000 | 4473800  | 1.90E+07 | 0        | 0       | 5817500  | 15100000 |
| 0        | 1722900  | 5037500  | 0        | 0        | 0        | 401410  | 0        | 0        |
| 0        | 0        | 0        | 0        | 0        | 0        | 0       | 0        | 0        |
| 10100000 | 7004600  | 19100000 | 15300000 | 14400000 | 10200000 | 5640800 | 18800000 | 23400000 |
| 0        | 0        | 0        | 0        | 0        | 0        | 0       | 0        | 0        |
| 1244500  | 0        | 0        | 0        | 0        | 1945500  | 0       | 0        | 3305800  |
| 1271000  | 5022700  | 0        | 0        | 0        | 1772200  | 3231500 | 1607500  | 0        |
| 0        | 0        | 0        | 0        | 0        | 0        | 0       | 0        | 0        |
| 1722600  | 2387400  | 4877900  | 3506600  | 6573600  | 3331200  | 1157500 | 4859100  | 7523100  |
| 10900000 | 8775900  | 0        | 4821300  | 5862900  | 9172100  | 1664700 | 7238300  | 1.20E+07 |
| 0        | 3.00E+07 | 10100000 | 58800000 | 11200000 | 21200000 | 3473200 | 43100000 | 10400000 |
| 2352800  | 0        | 0        | 5352300  | 0        | 0        | 0       | 717920   | 0        |
| 0        | 4245000  | 8904100  | 6731700  | 19100000 | 1406100  | 2381600 | 0        | 18700000 |
| 301840   | 1158600  | 0        | 746380   | 516620   | 2643800  | 213360  | 554360   | 561250   |
| 743190   | 4479200  | 4341200  | 6477600  | 7174400  | 2336600  | 0       | 5778900  | 9351500  |
| 11700000 | 1.10E+07 | 6467500  | 1608300  | 6273800  | 0        | 1462900 | 8008200  | 5734400  |
| 0        | 0        | 0        | 0        | 0        | 0        | 0       | 0        | 0        |
| 0        | 0        | 3927100  | 5764800  | 4849200  | 1657600  | 1578700 | 2650300  | 10200000 |
| 12600000 | 1488600  | 0        | 548390   | 0        | 0        | 4172500 | 0        | 760100   |
| 34900000 | 2544500  | 64300000 | 65600000 | 96700000 | 32200000 | 5582100 | 68700000 | 1.00E+08 |
| 0        | 0        | 0        | 0        | 0        | 0        | 0       | 0        | 0        |
| 0        | 0        | 0        | 0        | 0        | 0        | 0       | 0        | 0        |
| 20400000 | 12400000 | 26200000 | 17100000 | 28900000 | 10100000 | 4459600 | 21300000 | 32400000 |
| 0        | 0        | 0        | 0        | 0        | 0        | 0       | 0        | 0        |
| 2547500  | 0        | 0        | 5291100  | 8479900  | 0        | 2806300 | 4337700  | 8685400  |
| 11900000 | 22200000 | 15800000 | 1.90E+07 | 23200000 | 0        | 3489900 | 0        | 29200000 |
| 1615300  | 5238400  | 5189500  | 4881300  | 8167500  | 8574900  | 1891000 | 0        | 7119000  |
| 4186100  | 5369600  | 3118300  | 8240900  | 2597900  | 3800700  | 5053600 | 1.00E+07 | 16600000 |
| 2055200  | 2908700  | 4163400  | 0        | 3921000  | 2313900  | 1634900 | 2872400  | 5722800  |
| 1098400  | 1078500  | 5347300  | 0        | 2748500  | 0        | 1707200 | 1793300  | 3224900  |

|          |          |          |          |          |          |          |          |          |   |
|----------|----------|----------|----------|----------|----------|----------|----------|----------|---|
| 0        | 0        | 0        | 0        | 0        | 0        | 0        | 0        | 0        | 0 |
| 0        | 0        | 0        | 0        | 0        | 0        | 0        | 0        | 0        | 0 |
| 1459700  | 3486700  | 4085800  | 8648400  | 16100000 | 0        | 0        | 7187300  | 14900000 |   |
| 0        | 0        | 0        | 648280   | 373570   | 0        | 301080   | 804730   | 464650   |   |
| 1968700  | 2926800  | 0        | 0        | 5774600  | 1219200  | 2156100  | 9359200  | 0        |   |
| 1458100  | 0        | 5297700  | 12500000 | 6025800  | 1779500  | 11100000 | 3794600  | 6878900  |   |
| 982330   | 2628000  | 7607600  | 11200000 | 1018400  | 5099300  | 2957200  | 6319600  | 852200   |   |
| 734990   | 7302500  | 0        | 0        | 2106700  | 0        | 0        | 0        | 2905000  |   |
| 0        | 0        | 0        | 0        | 17600000 | 0        | 0        | 0        | 0        |   |
| 3490500  | 1152000  | 3406400  | 0        | 0        | 3425600  | 0        | 0        | 3660900  |   |
| 1400700  | 12200000 | 7975200  | 0        | 9386400  | 1838200  | 0        | 9314400  | 8361900  |   |
| 0        | 0        | 3916000  | 0        | 0        | 0        | 0        | 0        | 0        |   |
| 0        | 0        | 0        | 0        | 0        | 0        | 0        | 0        | 0        |   |
| 0        | 0        | 0        | 0        | 0        | 0        | 0        | 0        | 0        |   |
| 0        | 0        | 0        | 0        | 0        | 0        | 0        | 0        | 0        |   |
| 1227200  | 0        | 0        | 2131600  | 0        | 0        | 0        | 0        | 0        |   |
| 0        | 0        | 3282900  | 2791000  | 0        | 0        | 0        | 0        | 4674800  |   |
| 4467300  | 6687300  | 24800000 | 6464200  | 14900000 | 1818100  | 4522100  | 4044900  | 1.40E+07 |   |
| 0        | 2375700  | 0        | 0        | 0        | 0        | 0        | 0        | 0        |   |
| 6297300  | 4244800  | 0        | 16800000 | 0        | 1589700  | 2442200  | 0        | 0        |   |
| 0        | 0        | 0        | 0        | 0        | 0        | 0        | 0        | 0        |   |
| 0        | 2914900  | 0        | 7944000  | 1958800  | 4427800  | 4473500  | 6782800  | 3383500  |   |
| 0        | 0        | 0        | 4918800  | 4434700  | 0        | 0        | 0        | 9339700  |   |
| 0        | 4174300  | 12300000 | 15600000 | 12600000 | 3857600  | 3204700  | 6982100  | 18500000 |   |
| 5521700  | 3850200  | 16100000 | 18300000 | 16600000 | 3564200  | 3864000  | 12800000 | 13800000 |   |
| 0        | 0        | 0        | 0        | 0        | 0        | 0        | 0        | 0        |   |
| 11800000 | 15100000 | 5642200  | 24600000 | 4009900  | 13300000 | 9630900  | 20100000 | 2337200  |   |
| 478840   | 1224000  | 2464700  | 2186000  | 4360500  | 0        | 493050   | 795730   | 5582000  |   |
| 20100000 | 7532400  | 18800000 | 14700000 | 46300000 | 0        | 8727900  | 10400000 | 12200000 |   |
| 13200000 | 12100000 | 29500000 | 25800000 | 34300000 | 15900000 | 6263600  | 29600000 | 15700000 |   |
| 0        | 0        | 0        | 0        | 0        | 0        | 0        | 0        | 0        |   |
| 0        | 0        | 6674100  | 0        | 8517600  | 502700   | 0        | 3250600  | 0        |   |
| 4784400  | 4872900  | 0        | 0        | 1.80E+07 | 0        | 0        | 2489200  | 19400000 |   |
| 5708000  | 6053200  | 6000400  | 5304200  | 1.30E+07 | 0        | 2007500  | 7738000  | 12100000 |   |
| 0        | 0        | 3716200  | 2313000  | 2398300  | 6402100  | 0        | 0        | 0        |   |
| 0        | 0        | 0        | 8067000  | 0        | 0        | 2220000  | 0        | 11200000 |   |
| 5807200  | 6452500  | 590750   | 871420   | 674700   | 7507800  | 280970   | 8044800  | 5525400  |   |
| 0        | 0        | 0        | 927740   | 0        | 0        | 0        | 1530300  | 0        |   |
| 0        | 0        | 0        | 0        | 0        | 0        | 0        | 0        | 0        |   |
| 1694800  | 1683300  | 14700000 | 0        | 0        | 0        | 0        | 1649800  | 2568900  |   |
| 3227300  | 0        | 4797900  | 4591700  | 647810   | 0        | 1227200  | 4060600  | 5242900  |   |
| 4630500  | 3368300  | 3413300  | 0        | 10700000 | 0        | 0        | 13800000 | 13400000 |   |
| 0        | 0        | 0        | 1326600  | 0        | 0        | 0        | 0        | 13200000 |   |
| 10400000 | 1.20E+07 | 22400000 | 21100000 | 36700000 | 12500000 | 8742200  | 18900000 | 14500000 |   |
| 2159500  | 0        | 3912800  | 4822400  | 6833800  | 2573600  | 0        | 4713000  | 8299400  |   |
| 0        | 0        | 0        | 0        | 0        | 0        | 0        | 0        | 0        |   |
| 2998900  | 1421300  | 0        | 973120   | 4427800  | 1526500  | 1148600  | 3293000  | 5040200  |   |





|          |         |          |          |          |         |         |          |          |
|----------|---------|----------|----------|----------|---------|---------|----------|----------|
| 1390800  | 0       | 0        | 0        | 0        | 2017900 | 0       | 0        | 0        |
| 0        | 0       | 0        | 0        | 0        | 0       | 0       | 0        | 0        |
| 0        | 0       | 0        | 0        | 0        | 0       | 0       | 0        | 0        |
| 0        | 288630  | 0        | 0        | 2148100  | 1013300 | 0       | 1730100  | 0        |
| 0        | 0       | 0        | 0        | 0        | 0       | 0       | 0        | 3964400  |
| 6442500  | 0       | 3930400  | 0        | 4509800  | 0       | 0       | 0        | 6976600  |
| 1.30E+07 | 6550600 | 4624200  | 10900000 | 24100000 | 6799500 | 4122100 | 9377800  | 16300000 |
| 0        | 0       | 0        | 1378100  | 1613800  | 0       | 0       | 0        | 0        |
| 403000   | 0       | 0        | 0        | 0        | 0       | 0       | 0        | 367650   |
| 5095700  | 3447000 | 0        | 274140   | 3263700  | 2062400 | 0       | 2850400  | 5482700  |
| 2023100  | 1659200 | 0        | 0        | 0        | 1036700 | 0       | 2128400  | 0        |
| 2087700  | 737650  | 786160   | 1499200  | 0        | 4844100 | 2238500 | 4764500  | 0        |
| 0        | 5710900 | 8500800  | 0        | 633180   | 3737800 | 3491400 | 10200000 | 0        |
| 0        | 0       | 0        | 0        | 34500000 | 0       | 0       | 0        | 0        |
| 0        | 0       | 0        | 0        | 3558200  | 0       | 0       | 4019800  | 972750   |
| 737330   | 1247800 | 4442600  | 6303300  | 6905400  | 0       | 2122100 | 913670   | 9222100  |
| 326700   | 1101400 | 1140400  | 3330200  | 0        | 0       | 468550  | 0        | 0        |
| 0        | 0       | 0        | 0        | 0        | 0       | 0       | 0        | 0        |
| 0        | 0       | 0        | 0        | 0        | 0       | 539100  | 916370   | 0        |
| 0        | 0       | 0        | 0        | 0        | 2708300 | 2020700 | 0        | 897540   |
| 0        | 0       | 0        | 0        | 0        | 0       | 0       | 0        | 0        |
| 0        | 0       | 3536300  | 0        | 0        | 0       | 0       | 0        | 0        |
| 0        | 374210  | 1461400  | 800670   | 761670   | 1105400 | 276050  | 1148200  | 1008300  |
| 4268400  | 2058200 | 0        | 0        | 0        | 2619300 | 1160200 | 3572000  | 0        |
| 7293800  | 9369000 | 17600000 | 15100000 | 19700000 | 9973700 | 6815100 | 16300000 | 26700000 |
| 9557600  | 6259200 | 19800000 | 21200000 | 27900000 | 7759400 | 0       | 32200000 | 0        |
| 3028300  | 2014900 | 0        | 0        | 9130100  | 1397400 | 0       | 4134700  | 11900000 |
| 0        | 0       | 0        | 393980   | 5220300  | 0       | 0       | 175580   | 0        |
| 0        | 0       | 0        | 0        | 0        | 0       | 0       | 0        | 1149800  |
| 4421500  | 1921000 | 2970400  | 0        | 6868600  | 0       | 0       | 3579700  | 4829900  |
| 1599400  | 6394100 | 8345600  | 0        | 0        | 4154700 | 2702500 | 10900000 | 12200000 |
| 0        | 0       | 0        | 0        | 0        | 0       | 0       | 0        | 0        |
| 0        | 0       | 0        | 1892700  | 2530800  | 0       | 0       | 0        | 0        |
| 0        | 0       | 0        | 0        | 0        | 0       | 0       | 0        | 0        |
| 3329900  | 1437000 | 0        | 4318600  | 0        | 0       | 0       | 0        | 20100000 |
| 5661700  | 2388300 | 6064200  | 5858100  | 9857600  | 2902800 | 2312100 | 1.60E+07 | 14100000 |
| 1348700  | 0       | 0        | 7558100  | 7669900  | 1451400 | 1144300 | 206250   | 2449200  |
| 3222500  | 3575600 | 7839900  | 8899300  | 11700000 | 3658000 | 2997600 | 5837300  | 19600000 |
| 0        | 0       | 53800000 | 0        | 0        | 0       | 0       | 0        | 81700000 |
| 2550800  | 1747600 | 3164900  | 1611700  | 3113500  | 1091700 | 878060  | 2063000  | 4004700  |
| 0        | 3326500 | 0        | 0        | 0        | 1090600 | 0       | 4373100  | 0        |
| 1951100  | 2167300 | 0        | 2789100  | 11400000 | 0       | 6149000 | 4911100  | 4199300  |
| 0        | 0       | 0        | 0        | 0        | 0       | 0       | 0        | 0        |
| 0        | 0       | 0        | 0        | 0        | 0       | 0       | 0        | 0        |
| 0        | 0       | 0        | 0        | 0        | 0       | 0       | 0        | 0        |
| 0        | 0       | 3730400  | 0        | 0        | 0       | 0       | 0        | 14200000 |
| 0        | 0       | 5019700  | 0        | 0        | 7184600 | 0       | 0        | 0        |

|         |         |         |          |          |         |          |          |          |
|---------|---------|---------|----------|----------|---------|----------|----------|----------|
| 0       | 0       | 0       | 0        | 0        | 0       | 0        | 0        | 0        |
| 0       | 0       | 0       | 0        | 0        | 0       | 0        | 0        | 0        |
| 0       | 0       | 0       | 0        | 0        | 0       | 0        | 0        | 0        |
| 0       | 0       | 0       | 0        | 0        | 0       | 0        | 0        | 0        |
| 0       | 2577500 | 8807400 | 17500000 | 32900000 | 3835500 | 1904100  | 23100000 | 13900000 |
| 0       | 0       | 0       | 0        | 0        | 0       | 0        | 0        | 0        |
| 2726200 | 4711500 | 0       | 0        | 3671700  | 890820  | 0        | 4345900  | 5561900  |
| 876310  | 1973400 | 1342400 | 1471000  | 0        | 1734800 | 1252700  | 1546800  | 1754800  |
| 0       | 0       | 0       | 0        | 0        | 0       | 0        | 0        | 0        |
| 398920  | 0       | 0       | 3043500  | 0        | 0       | 0        | 0        | 7225300  |
| 0       | 0       | 0       | 0        | 0        | 0       | 0        | 0        | 0        |
| 0       | 0       | 0       | 2815200  | 0        | 0       | 0        | 0        | 5319400  |
| 0       | 0       | 0       | 0        | 0        | 0       | 0        | 3506900  | 0        |
| 0       | 0       | 0       | 0        | 0        | 2959200 | 0        | 0        | 0        |
| 2294800 | 1891800 | 8150300 | 0        | 7316500  | 0       | 0        | 0        | 0        |
| 0       | 0       | 0       | 0        | 0        | 0       | 18900000 | 0        | 0        |
| 0       | 0       | 0       | 0        | 0        | 0       | 0        | 0        | 0        |
| 0       | 0       | 0       | 0        | 0        | 0       | 0        | 0        | 0        |
| 5134800 | 2633500 | 6218700 | 0        | 0        | 0       | 0        | 5500300  | 2059200  |
| 0       | 0       | 0       | 0        | 0        | 0       | 0        | 0        | 0        |
| 4292200 | 3142100 | 0       | 4889900  | 0        | 4757200 | 1806100  | 7647800  | 6845600  |
| 2934800 | 1331400 | 0       | 0        | 0        | 1485100 | 1253200  | 2336000  | 0        |
| 0       | 0       | 0       | 0        | 0        | 0       | 0        | 0        | 0        |
| 0       | 0       | 0       | 0        | 0        | 0       | 0        | 0        | 0        |
| 0       | 0       | 212560  | 366920   | 0        | 0       | 0        | 0        | 0        |
| 0       | 0       | 0       | 0        | 0        | 0       | 0        | 0        | 0        |
| 0       | 0       | 0       | 0        | 0        | 0       | 0        | 0        | 0        |
| 6504800 | 2255200 | 0       | 3105500  | 3058800  | 1421600 | 0        | 2163900  | 4506300  |
| 0       | 0       | 0       | 0        | 0        | 6613100 | 0        | 0        | 5154500  |
| 0       | 0       | 0       | 0        | 0        | 0       | 0        | 0        | 0        |
| 0       | 0       | 0       | 0        | 0        | 0       | 0        | 0        | 0        |
| 2219900 | 0       | 0       | 0        | 0        | 1770400 | 1085300  | 0        | 0        |
| 578070  | 644800  | 2686800 | 0        | 0        | 2916900 | 1528900  | 797420   | 2331000  |
| 0       | 0       | 0       | 0        | 0        | 0       | 0        | 0        | 0        |
| 1952700 | 1665500 | 0       | 0        | 0        | 0       | 1533600  | 2820800  | 7344100  |
| 3461500 | 4747100 | 1912700 | 1941900  | 2667200  | 1189900 | 676080   | 2861000  | 3097500  |
| 0       | 0       | 0       | 0        | 0        | 0       | 0        | 0        | 0        |
| 0       | 0       | 0       | 0        | 0        | 0       | 0        | 0        | 0        |
| 0       | 0       | 0       | 0        | 0        | 0       | 0        | 0        | 0        |
| 0       | 0       | 0       | 0        | 0        | 0       | 0        | 0        | 0        |
| 5649500 | 0       | 0       | 0        | 0        | 0       | 0        | 0        | 0        |
| 0       | 0       | 0       | 0        | 0        | 0       | 0        | 0        | 0        |
| 0       | 3669400 | 0       | 0        | 0        | 0       | 0        | 5692700  | 10200000 |
| 4147800 | 3466700 | 4825600 | 0        | 11100000 | 0       | 2932200  | 4910100  | 9249500  |
| 0       | 0       | 0       | 0        | 0        | 0       | 0        | 0        | 0        |
| 0       | 0       | 3995200 | 0        | 5480200  | 0       | 0        | 0        | 15400000 |
| 2225300 | 0       | 0       | 0        | 5876300  | 4651400 | 3064300  | 3338900  | 5808300  |



|          |          |          |          |          |          |          |          |          |   |
|----------|----------|----------|----------|----------|----------|----------|----------|----------|---|
| 0        | 0        | 0        | 0        | 0        | 0        | 0        | 0        | 0        | 0 |
| 0        | 0        | 0        | 0        | 0        | 0        | 0        | 0        | 0        | 0 |
| 31800000 | 0        | 61100000 | 57100000 | 96700000 | 29900000 | 0        | 63200000 | 90700000 |   |
| 0        | 2691200  | 0        | 0        | 3426100  | 0        | 1145100  | 0        | 0        | 0 |
| 0        | 0        | 0        | 0        | 0        | 0        | 0        | 0        | 0        | 0 |
| 0        | 0        | 3945600  | 0        | 0        | 0        | 0        | 0        | 0        | 0 |
| 0        | 0        | 0        | 0        | 0        | 0        | 0        | 0        | 0        | 0 |
| 0        | 0        | 0        | 0        | 0        | 0        | 0        | 0        | 0        | 0 |
| 24800000 | 27500000 | 39600000 | 1.70E+07 | 33400000 | 14600000 | 9463900  | 34600000 | 33800000 |   |
| 0        | 0        | 0        | 0        | 0        | 0        | 0        | 0        | 0        | 0 |
| 0        | 0        | 0        | 0        | 0        | 0        | 0        | 0        | 0        | 0 |
| 0        | 0        | 0        | 0        | 0        | 0        | 0        | 0        | 0        | 0 |
| 0        | 0        | 0        | 0        | 0        | 0        | 0        | 0        | 0        | 0 |
| 0        | 0        | 0        | 791960   | 0        | 49400000 | 0        | 0        | 0        | 0 |
| 0        | 0        | 0        | 0        | 0        | 0        | 0        | 0        | 0        | 0 |
| 0        | 0        | 0        | 0        | 0        | 0        | 0        | 0        | 0        | 0 |
| 0        | 0        | 0        | 0        | 0        | 0        | 0        | 0        | 0        | 0 |
| 0        | 0        | 0        | 0        | 0        | 0        | 0        | 0        | 0        | 0 |
| 64400000 | 57200000 | 96100000 | 1.15E+08 | 1.60E+08 | 95300000 | 33100000 | 1.11E+08 | 1.08E+08 |   |
| 0        | 0        | 0        | 0        | 0        | 0        | 0        | 0        | 0        | 0 |
| 0        | 0        | 0        | 0        | 0        | 0        | 0        | 0        | 0        | 0 |
| 2177800  | 1737900  | 2.10E+07 | 1.60E+07 | 5779200  | 8400200  | 1387500  | 4828700  | 36100000 |   |
| 0        | 0        | 0        | 0        | 0        | 0        | 0        | 0        | 0        | 0 |
| 0        | 0        | 0        | 0        | 0        | 0        | 0        | 0        | 0        | 0 |
| NA       | NA       | 1.02E+09 | 9.91E+08 | 1.30E+09 | NA       | NA       | NA       | 1.57E+09 |   |
| NA       | NA       | 6.32E+08 | 5.28E+08 | 1.44E+08 | NA       | NA       | NA       | 8.21E+08 |   |
| NA       | NA       | 1.78E+10 | 1.62E+10 | 2.12E+10 | NA       | NA       | NA       | 2.80E+10 |   |
| NA       | NA       | 6.93E+08 | 6.39E+08 | 3.48E+08 | NA       | NA       | NA       | 5.36E+08 |   |
| NA       | NA       | 5.51E+08 | 5.08E+08 | 8.53E+08 | NA       | NA       | NA       | 7.60E+08 |   |
| NA       | NA       | 2.17E+09 | 2.00E+09 | 2.54E+09 | NA       | NA       | NA       | 2.56E+09 |   |
| NA       | NA       | 3.41E+08 | 3.41E+08 | 5.44E+08 | NA       | NA       | NA       | 6.27E+08 |   |
| NA       | NA       | 8.30E+08 | 1.24E+09 | 8.43E+08 | NA       | NA       | NA       | 9.90E+08 |   |
| NA       | NA       | 1.01E+08 | 1.13E+08 | 2.05E+08 | NA       | NA       | NA       | 2.08E+08 |   |
| NA       | NA       | 2.45E+08 | 2.74E+08 | 2.86E+08 | NA       | NA       | NA       | 3.83E+08 |   |
| NA       | NA       | 8778200  | 901030   | 37600000 | NA       | NA       | NA       | 0        |   |
| NA       | NA       | 2.87E+08 | 2.97E+08 | 4.63E+08 | NA       | NA       | NA       | 3.43E+08 |   |
| NA       | NA       | 2.49E+08 | 2.99E+08 | 3.28E+08 | NA       | NA       | NA       | 3.21E+08 |   |
| NA       | NA       | 1.79E+08 | 95500000 | 2.71E+08 | NA       | NA       | NA       | 2.94E+08 |   |
| NA       | NA       | 6.80E+07 | 55800000 | 1.14E+08 | NA       | NA       | NA       | 1.34E+08 |   |
| NA       | NA       | 68800000 | 45200000 | 92700000 | NA       | NA       | NA       | 1.08E+08 |   |
| NA       | NA       | 2.71E+08 | 2.28E+08 | 3.97E+08 | NA       | NA       | NA       | 4.68E+08 |   |
| NA       | NA       | 1.16E+08 | 87400000 | 1.55E+08 | NA       | NA       | NA       | 1.52E+08 |   |
| NA       | NA       | 5.03E+08 | 3.21E+08 | 4.08E+08 | NA       | NA       | NA       | 5.61E+08 |   |
| NA       | NA       | 85200000 | 76700000 | 55100000 | NA       | NA       | NA       | 86200000 |   |
| NA       | NA       | 35400000 | 45800000 | 1.09E+08 | NA       | NA       | NA       | 93300000 |   |
| NA       | NA       | 1.04E+08 | 1.04E+08 | 1.09E+08 | NA       | NA       | NA       | 2.21E+08 |   |
| NA       | NA       | 1.49E+08 | 75500000 | 1.67E+08 | NA       | NA       | NA       | 1.04E+08 |   |

|    |    |          |          |          |    |    |    |          |
|----|----|----------|----------|----------|----|----|----|----------|
| NA | NA | 27400000 | 37300000 | 46800000 | NA | NA | NA | 57900000 |
| NA | NA | 1.55E+08 | 1.51E+08 | 1.92E+08 | NA | NA | NA | 2.24E+08 |
| NA | NA | 1.12E+08 | 63800000 | 1.30E+08 | NA | NA | NA | 1.19E+08 |
| NA | NA | 26200000 | 32900000 | 32800000 | NA | NA | NA | 26200000 |
| NA | NA | 3745500  | 1456600  | 0        | NA | NA | NA | 0        |
| NA | NA | 16300000 | 5.40E+07 | 60300000 | NA | NA | NA | 44500000 |
| NA | NA | 19400000 | 19200000 | 20500000 | NA | NA | NA | 34900000 |
| NA | NA | 43500000 | 65100000 | 72400000 | NA | NA | NA | 83200000 |
| NA | NA | 33400000 | 60200000 | 48900000 | NA | NA | NA | 67800000 |
| NA | NA | 1.56E+08 | 1.58E+08 | 2.57E+08 | NA | NA | NA | 3.49E+08 |
| NA | NA | 55800000 | 0        | 68900000 | NA | NA | NA | 43400000 |
| NA | NA | 6.30E+07 | 79100000 | 1.18E+08 | NA | NA | NA | 77500000 |
| NA | NA | 76900000 | 73100000 | 1.18E+08 | NA | NA | NA | 1.36E+08 |
| NA | NA | 25600000 | 21400000 | 13300000 | NA | NA | NA | 38700000 |
| NA | NA | 2605300  | 9164400  | 0        | NA | NA | NA | 4327300  |
| NA | NA | 16700000 | 22200000 | 17400000 | NA | NA | NA | 34200000 |
| NA | NA | 24700000 | 12600000 | 32800000 | NA | NA | NA | 19200000 |
| NA | NA | 49500000 | 1.80E+07 | 47700000 | NA | NA | NA | 56100000 |
| NA | NA | 3.60E+07 | 45400000 | 23600000 | NA | NA | NA | 66900000 |
| NA | NA | 1499600  | 32500000 | 0        | NA | NA | NA | 0        |
| NA | NA | 36500000 | 22400000 | 56400000 | NA | NA | NA | 4.60E+07 |
| NA | NA | 46900000 | 39700000 | 42700000 | NA | NA | NA | 52800000 |
| NA | NA | 53800000 | 3.60E+07 | 74100000 | NA | NA | NA | 86200000 |
| NA | NA | 24100000 | 1.60E+07 | 31300000 | NA | NA | NA | 51700000 |
| NA | NA | 2.70E+07 | 3.00E+07 | 72100000 | NA | NA | NA | 80200000 |
| NA | NA | 44600000 | 28400000 | 68800000 | NA | NA | NA | 54100000 |
| NA | NA | 5009000  | 29700000 | 7165400  | NA | NA | NA | 12600000 |
| NA | NA | 49700000 | 23800000 | 5.10E+07 | NA | NA | NA | 4.60E+07 |
| NA | NA | 10100000 | 26300000 | 33200000 | NA | NA | NA | 3.10E+07 |
| NA | NA | 5217100  | 12800000 | 24400000 | NA | NA | NA | 16700000 |
| NA | NA | 11400000 | 6954200  | 8556200  | NA | NA | NA | 2904500  |
| NA | NA | 36800000 | 20800000 | 54200000 | NA | NA | NA | 65700000 |
| NA | NA | 0        | 0        | 1373200  | NA | NA | NA | 0        |
| NA | NA | 7512600  | 16300000 | 6245900  | NA | NA | NA | 0        |
| NA | NA | 7406600  | 0        | 0        | NA | NA | NA | 0        |
| NA | NA | 0        | 2956100  | 0        | NA | NA | NA | 8171800  |
| NA | NA | 2860900  | 35400000 | 1.30E+07 | NA | NA | NA | 13500000 |
| NA | NA | 0        | 9670700  | 0        | NA | NA | NA | 733860   |
| NA | NA | 41700000 | 681800   | 5.50E+08 | NA | NA | NA | 37500000 |
| NA | NA | 11500000 | 13700000 | 1.90E+07 | NA | NA | NA | 33900000 |
| NA | NA | 0        | 0        | 0        | NA | NA | NA | 1087300  |
| NA | NA | 5191800  | 11700000 | 16800000 | NA | NA | NA | 1.60E+07 |
| NA | NA | 0        | 0        | 4679100  | NA | NA | NA | 1695500  |
| NA | NA | 3.55E+08 | 3.15E+08 | 1.34E+08 | NA | NA | NA | 5.76E+08 |
| NA | NA | 13300000 | 0        | 0        | NA | NA | NA | 0        |
| NA | NA | 16400000 | 1025900  | 19400000 | NA | NA | NA | 22700000 |
| NA | NA | 9827300  | 0        | 13100000 | NA | NA | NA | 0        |

|    |    |          |          |          |    |    |    |          |
|----|----|----------|----------|----------|----|----|----|----------|
| NA | NA | 0        | 0        | 0        | NA | NA | NA | 0        |
| NA | NA | 0        | 0        | 714230   | NA | NA | NA | 0        |
| NA | NA | 1545200  | 1566800  | 2767800  | NA | NA | NA | 2479000  |
| NA | NA | 1.40E+07 | 33900000 | 19600000 | NA | NA | NA | 22400000 |
| NA | NA | 6189800  | 11100000 | 15200000 | NA | NA | NA | 13800000 |
| NA | NA | 0        | 0        | 2975800  | NA | NA | NA | 0        |
| NA | NA | 0        | 19400000 | 0        | NA | NA | NA | 42900000 |
| NA | NA | 0        | 5352500  | 0        | NA | NA | NA | 8020200  |
| NA | NA | 21100000 | 5302900  | 1.90E+07 | NA | NA | NA | 21900000 |
| NA | NA | 35700000 | 12700000 | 13600000 | NA | NA | NA | 20300000 |
| NA | NA | 1551800  | 9854400  | 7299400  | NA | NA | NA | 4146300  |
| NA | NA | 0        | 1885500  | 0        | NA | NA | NA | 0        |
| NA | NA | 0        | 0        | 0        | NA | NA | NA | 0        |
| NA | NA | 13700000 | 6919500  | 14500000 | NA | NA | NA | 18400000 |
| NA | NA | 10900000 | 1.50E+07 | 18700000 | NA | NA | NA | 19200000 |
| NA | NA | 0        | 0        | 21400000 | NA | NA | NA | 0        |
| NA | NA | 8157100  | 15900000 | 8465400  | NA | NA | NA | 9266700  |
| NA | NA | 0        | 0        | 0        | NA | NA | NA | 5092200  |
| NA | NA | 24100000 | 22600000 | 25200000 | NA | NA | NA | 30600000 |
| NA | NA | 4714600  | 2244300  | 12300000 | NA | NA | NA | 4676000  |
| NA | NA | 17600000 | 1.10E+07 | 8280900  | NA | NA | NA | 18800000 |
| NA | NA | 0        | 0        | 0        | NA | NA | NA | 0        |
| NA | NA | 0        | 465450   | 0        | NA | NA | NA | 51900000 |
| NA | NA | 0        | 0        | 0        | NA | NA | NA | 0        |
| NA | NA | 2310500  | 0        | 12900000 | NA | NA | NA | 703860   |
| NA | NA | 10400000 | 9193200  | 7143900  | NA | NA | NA | 0        |
| NA | NA | 7009400  | 0        | 0        | NA | NA | NA | 5168800  |
| NA | NA | 37700000 | 5291700  | 22300000 | NA | NA | NA | 8516500  |
| NA | NA | 0        | 0        | 0        | NA | NA | NA | 0        |
| NA | NA | 0        | 0        | 1096400  | NA | NA | NA | 0        |
| NA | NA | 6523000  | 6324400  | 12300000 | NA | NA | NA | 23800000 |
| NA | NA | 7605600  | 5817800  | 8742300  | NA | NA | NA | 8455700  |
| NA | NA | 6763000  | 0        | 3770400  | NA | NA | NA | 27600000 |
| NA | NA | 9525700  | 7077400  | 27700000 | NA | NA | NA | 31600000 |
| NA | NA | 23900000 | 10600000 | 0        | NA | NA | NA | 6672100  |
| NA | NA | 0        | 0        | 0        | NA | NA | NA | 0        |
| NA | NA | 0        | 2263500  | 15800000 | NA | NA | NA | 13800000 |
| NA | NA | 0        | 0        | 0        | NA | NA | NA | 759490   |
| NA | NA | 5407800  | 2988300  | 16800000 | NA | NA | NA | 0        |
| NA | NA | 1148500  | 2054600  | 1293300  | NA | NA | NA | 228070   |
| NA | NA | 0        | 0        | 0        | NA | NA | NA | 0        |
| NA | NA | 0        | 0        | 0        | NA | NA | NA | 0        |
| NA | NA | 0        | 0        | 0        | NA | NA | NA | 14400000 |
| NA | NA | 14700000 | 5174300  | 11300000 | NA | NA | NA | 19300000 |
| NA | NA | 3424300  | 1331100  | 0        | NA | NA | NA | 0        |
| NA | NA | 0        | 0        | 0        | NA | NA | NA | 0        |
| NA | NA | 29200000 | 0        | 0        | NA | NA | NA | 2670700  |

|    |    |          |          |          |    |    |    |          |
|----|----|----------|----------|----------|----|----|----|----------|
| NA | NA | 0        | 25200000 | 0        | NA | NA | NA | 0        |
| NA | NA | 0        | 0        | 0        | NA | NA | NA | 0        |
| NA | NA | 1883400  | 4456900  | 6492900  | NA | NA | NA | 7604100  |
| NA | NA | 7939300  | 28200000 | 17400000 | NA | NA | NA | 1.70E+07 |
| NA | NA | 225930   | 8195000  | 0        | NA | NA | NA | 6684900  |
| NA | NA | 0        | 5125300  | 4251200  | NA | NA | NA | 7468800  |
| NA | NA | 843490   | 1608500  | 642140   | NA | NA | NA | 0        |
| NA | NA | 6699500  | 8907100  | 10600000 | NA | NA | NA | 11200000 |
| NA | NA | 12400000 | 0        | 0        | NA | NA | NA | 6177500  |
| NA | NA | 0        | 0        | 0        | NA | NA | NA | 0        |
| NA | NA | 28800000 | 24400000 | 48800000 | NA | NA | NA | 4.20E+07 |
| NA | NA | 19700000 | 18800000 | 23500000 | NA | NA | NA | 2.60E+07 |
| NA | NA | 501700   | 593040   | 894570   | NA | NA | NA | 2715900  |
| NA | NA | 2626600  | 1735000  | 2509200  | NA | NA | NA | 2439000  |
| NA | NA | 0        | 0        | 0        | NA | NA | NA | 0        |
| NA | NA | 0        | 0        | 0        | NA | NA | NA | 0        |
| NA | NA | 4476500  | 3936500  | 11900000 | NA | NA | NA | 9504000  |
| NA | NA | 1418900  | 2627900  | 5435400  | NA | NA | NA | 1725900  |
| NA | NA | 5904400  | 4951100  | 13500000 | NA | NA | NA | 19800000 |
| NA | NA | 0        | 2566700  | 0        | NA | NA | NA | 0        |
| NA | NA | 0        | 0        | 0        | NA | NA | NA | 0        |
| NA | NA | 2538200  | 0        | 0        | NA | NA | NA | 0        |
| NA | NA | 980480   | 0        | 3491500  | NA | NA | NA | 0        |
| NA | NA | 1.57E+08 | 1.19E+08 | 2.95E+08 | NA | NA | NA | 3.24E+08 |
| NA | NA | 9405000  | 0        | 0        | NA | NA | NA | 0        |
| NA | NA | 5036300  | 6537500  | 0        | NA | NA | NA | 0        |
| NA | NA | 5250900  | 3730000  | 0        | NA | NA | NA | 0        |
| NA | NA | 2737900  | 3043500  | 6592000  | NA | NA | NA | 17900000 |
| NA | NA | 0        | 0        | 0        | NA | NA | NA | 0        |
| NA | NA | 0        | 0        | 0        | NA | NA | NA | 0        |
| NA | NA | 0        | 0        | 4691300  | NA | NA | NA | 9413100  |
| NA | NA | 0        | 2753500  | 0        | NA | NA | NA | 6784800  |
| NA | NA | 560530   | 4585300  | 3697000  | NA | NA | NA | 4774700  |
| NA | NA | 0        | 0        | 0        | NA | NA | NA | 0        |
| NA | NA | 0        | 0        | 1374200  | NA | NA | NA | 0        |
| NA | NA | 0        | 0        | 0        | NA | NA | NA | 0        |
| NA | NA | 16200000 | 1.50E+07 | 27600000 | NA | NA | NA | 13300000 |
| NA | NA | 0        | 0        | 4241600  | NA | NA | NA | 0        |
| NA | NA | 0        | 0        | 0        | NA | NA | NA | 0        |
| NA | NA | 4231700  | 3964700  | 6443100  | NA | NA | NA | 4039200  |
| NA | NA | 3.20E+07 | 49200000 | 72600000 | NA | NA | NA | 7.20E+07 |
| NA | NA | 821250   | 889560   | 2418300  | NA | NA | NA | 646960   |
| NA | NA | 0        | 0        | 5119300  | NA | NA | NA | 0        |
| NA | NA | 0        | 0        | 0        | NA | NA | NA | 0        |
| NA | NA | 0        | 0        | 9934200  | NA | NA | NA | 0        |
| NA | NA | 15100000 | 0        | 0        | NA | NA | NA | 0        |
| NA | NA | 0        | 0        | 0        | NA | NA | NA | 0        |



|    |    |          |          |          |    |    |    |          |
|----|----|----------|----------|----------|----|----|----|----------|
| NA | NA | 0        | 0        | 0        | NA | NA | NA | 0        |
| NA | NA | 0        | 0        | 0        | NA | NA | NA | 0        |
| NA | NA | 2360800  | 2068600  | 0        | NA | NA | NA | 3806200  |
| NA | NA | 0        | 0        | 0        | NA | NA | NA | 0        |
| NA | NA | 0        | 0        | 0        | NA | NA | NA | 0        |
| NA | NA | 3436500  | 0        | 0        | NA | NA | NA | 3118800  |
| NA | NA | 0        | 377020   | 0        | NA | NA | NA | 501340   |
| NA | NA | 1128700  | 1128200  | 6950500  | NA | NA | NA | 1458200  |
| NA | NA | 1659200  | 2003200  | 1628000  | NA | NA | NA | 934860   |
| NA | NA | 0        | 0        | 0        | NA | NA | NA | 0        |
| NA | NA | 2966100  | 0        | 0        | NA | NA | NA | 0        |
| NA | NA | 0        | 0        | 2094400  | NA | NA | NA | 1675900  |
| NA | NA | 4261300  | 3693800  | 5579600  | NA | NA | NA | 9130600  |
| NA | NA | 8344100  | 7856400  | 10100000 | NA | NA | NA | 9880400  |
| NA | NA | 0        | 0        | 0        | NA | NA | NA | 0        |
| NA | NA | 3209400  | 5359400  | 3791800  | NA | NA | NA | 4066900  |
| NA | NA | 0        | 0        | 0        | NA | NA | NA | 0        |
| NA | NA | 0        | 8872300  | 0        | NA | NA | NA | 0        |
| NA | NA | 0        | 0        | 9106600  | NA | NA | NA | 0        |
| NA | NA | 4205500  | 4693400  | 4770800  | NA | NA | NA | 3993600  |
| NA | NA | 0        | 0        | 1798100  | NA | NA | NA | 507460   |
| NA | NA | 0        | 0        | 0        | NA | NA | NA | 0        |
| NA | NA | 13600000 | 0        | 24400000 | NA | NA | NA | 30700000 |
| NA | NA | 7513800  | 4650500  | 6210100  | NA | NA | NA | 11700000 |
| NA | NA | 0        | 3.50E+07 | 0        | NA | NA | NA | 0        |
| NA | NA | 6432000  | 5018000  | 0        | NA | NA | NA | 8080300  |
| NA | NA | 0        | 0        | 3910900  | NA | NA | NA | 1595300  |
| NA | NA | 0        | 0        | 0        | NA | NA | NA | 0        |
| NA | NA | 0        | 0        | 0        | NA | NA | NA | 0        |
| NA | NA | 0        | 0        | 0        | NA | NA | NA | 0        |
| NA | NA | 0        | 0        | 0        | NA | NA | NA | 0        |
| NA | NA | 1757300  | 0        | 2897500  | NA | NA | NA | 3808200  |
| NA | NA | 0        | 0        | 0        | NA | NA | NA | 0        |
| NA | NA | 9507300  | 0        | 3364500  | NA | NA | NA | 4134800  |
| NA | NA | 0        | 0        | 689500   | NA | NA | NA | 705460   |
| NA | NA | 0        | 4883700  | 7124700  | NA | NA | NA | 6629800  |
| NA | NA | 0        | 0        | 0        | NA | NA | NA | 0        |
| NA | NA | 0        | 0        | 0        | NA | NA | NA | 0        |
| NA | NA | 0        | 0        | 0        | NA | NA | NA | 0        |
| NA | NA | 0        | 0        | 0        | NA | NA | NA | 0        |
| NA | NA | 0        | 0        | 0        | NA | NA | NA | 0        |
| NA | NA | 0        | 0        | 490470   | NA | NA | NA | 9924000  |
| NA | NA | 670540   | 0        | 0        | NA | NA | NA | 0        |
| NA | NA | 0        | 0        | 7683300  | NA | NA | NA | 0        |
| NA | NA | 0        | 0        | 0        | NA | NA | NA | 0        |
| NA | NA | 0        | 0        | 0        | NA | NA | NA | 0        |
| NA | NA | 0        | 2989500  | 4826800  | NA | NA | NA | 0        |





|          |          |          |          |          |          |          |          |          |
|----------|----------|----------|----------|----------|----------|----------|----------|----------|
| NA       | NA       | 0        | 0        | 0        | NA       | NA       | NA       | 0        |
| NA       | NA       | 0        | 0        | 0        | NA       | NA       | NA       | 0        |
| NA       | NA       | 0        | 0        | 0        | NA       | NA       | NA       | 0        |
| NA       | NA       | 0        | 0        | 0        | NA       | NA       | NA       | 0        |
| NA       | NA       | 0        | 0        | 0        | NA       | NA       | NA       | 0        |
| NA       | NA       | 0        | 0        | 0        | NA       | NA       | NA       | 0        |
| NA       | NA       | 0        | 0        | 0        | NA       | NA       | NA       | 0        |
| NA       | NA       | 0        | 0        | 0        | NA       | NA       | NA       | 0        |
| NA       | NA       | 0        | 0        | 0        | NA       | NA       | NA       | 0        |
| NA       | NA       | 0        | 0        | 0        | NA       | NA       | NA       | 0        |
| NA       | NA       | 40900000 | 2584600  | 47800000 | NA       | NA       | NA       | 75500000 |
| NA       | NA       | 0        | 0        | 9907700  | NA       | NA       | NA       | 21100000 |
| NA       | NA       | 7143600  | 5844000  | 7497500  | NA       | NA       | NA       | 7717000  |
| NA       | NA       | 0        | 0        | 24400000 | NA       | NA       | NA       | 41800000 |
| NA       | NA       | 4202100  | 3787900  | 4754600  | NA       | NA       | NA       | 7299200  |
| NA       | NA       | 0        | 0        | 0        | NA       | NA       | NA       | 0        |
| NA       | NA       | 0        | 0        | 0        | NA       | NA       | NA       | 0        |
| NA       | NA       | 0        | 0        | 0        | NA       | NA       | NA       | 0        |
| NA       | NA       | 0        | 0        | 0        | NA       | NA       | NA       | 0        |
| NA       | NA       | 0        | 0        | 0        | NA       | NA       | NA       | 0        |
| NA       | NA       | 3538200  | 3861400  | 3229400  | NA       | NA       | NA       | 6151600  |
| NA       | NA       | 0        | 0        | 0        | NA       | NA       | NA       | 0        |
| NA       | NA       | 0        | 0        | 0        | NA       | NA       | NA       | 0        |
| NA       | NA       | 0        | 0        | 0        | NA       | NA       | NA       | 0        |
| NA       | NA       | 0        | 0        | 0        | NA       | NA       | NA       | 0        |
| NA       | NA       | 0        | 0        | 0        | NA       | NA       | NA       | 0        |
| NA       | NA       | 0        | 0        | 0        | NA       | NA       | NA       | 0        |
| NA       | NA       | 0        | 0        | 0        | NA       | NA       | NA       | 0        |
| NA       | NA       | 0        | 0        | 0        | NA       | NA       | NA       | 0        |
| NA       | NA       | 0        | 0        | 0        | NA       | NA       | NA       | 0        |
| NA       | NA       | 0        | 0        | 0        | NA       | NA       | NA       | 0        |
| NA       | NA       | 0        | 0        | 0        | NA       | NA       | NA       | 0        |
| NA       | NA       | 0        | 0        | 0        | NA       | NA       | NA       | 0        |
| NA       | NA       | 0        | 0        | 0        | NA       | NA       | NA       | 0        |
| NA       | NA       | 0        | 0        | 0        | NA       | NA       | NA       | 0        |
| NA       | NA       | 0        | 0        | 0        | NA       | NA       | NA       | 0        |
| NA       | NA       | 8.10E+07 | 3.80E+07 | 63700000 | NA       | NA       | NA       | 1.30E+08 |
| NA       | NA       | 531960   | 592240   | 2682200  | NA       | NA       | NA       | 407100   |
| NA       | NA       | 0        | 0        | 0        | NA       | NA       | NA       | 0        |
| NA       | NA       | 8962000  | 9044300  | 8902200  | NA       | NA       | NA       | 0        |
| 4.53E+08 | 4.92E+08 | NA       | NA       | NA       | 4.23E+08 | 3.44E+08 | 9.04E+08 | NA       |
| 9.74E+09 | 1.00E+10 | NA       | NA       | NA       | 1.04E+10 | 7.04E+09 | 1.58E+10 | NA       |
| 9.57E+08 | 8.65E+08 | NA       | NA       | NA       | 1.00E+09 | 7.07E+08 | 1.75E+09 | NA       |
| 3.33E+08 | 2.04E+08 | NA       | NA       | NA       | 2.79E+08 | 2.39E+08 | 1.38E+08 | NA       |
| 1.77E+08 | 2.01E+08 | NA       | NA       | NA       | 1.51E+08 | 1.30E+08 | 3.11E+08 | NA       |
| 2.42E+08 | 2.09E+08 | NA       | NA       | NA       | 2.54E+08 | 1.78E+08 | 4.88E+08 | NA       |
| 1.13E+08 | 1.38E+08 | NA       | NA       | NA       | 1.29E+08 | 1.01E+08 | 2.65E+08 | NA       |

|          |          |    |    |    |          |          |          |    |
|----------|----------|----|----|----|----------|----------|----------|----|
| 3.35E+08 | 3.65E+08 | NA | NA | NA | 3.27E+08 | 2.45E+08 | 4.66E+08 | NA |
| 0        | 2431600  | NA | NA | NA | 7779300  | 4059400  | 3843600  | NA |
| 60400000 | 56800000 | NA | NA | NA | 53400000 | 4.60E+07 | 1.26E+08 | NA |
| 1.17E+08 | 1.13E+08 | NA | NA | NA | 1.13E+08 | 9.30E+07 | 2.44E+08 | NA |
| 1.42E+08 | 1.33E+08 | NA | NA | NA | 1.27E+08 | 1.01E+08 | 2.34E+08 | NA |
| 27800000 | 35200000 | NA | NA | NA | 4.50E+07 | 29200000 | 50400000 | NA |
| 65700000 | 1.38E+08 | NA | NA | NA | 1.04E+08 | 73100000 | 3.28E+08 | NA |
| 4.80E+07 | 40900000 | NA | NA | NA | 35900000 | 31400000 | 84600000 | NA |
| 2.79E+08 | 2.30E+08 | NA | NA | NA | 2.51E+08 | 1.05E+08 | 2.96E+08 | NA |
| 12400000 | 63500000 | NA | NA | NA | 53900000 | 33400000 | 61800000 | NA |
| 1.70E+08 | 1.37E+08 | NA | NA | NA | 1.35E+08 | 1.04E+08 | 1.77E+08 | NA |
| 21500000 | 41100000 | NA | NA | NA | 47800000 | 25700000 | 80100000 | NA |
| 32400000 | 40700000 | NA | NA | NA | 41100000 | 19500000 | 77200000 | NA |
| 1.23E+08 | 1.04E+08 | NA | NA | NA | 1.12E+08 | 90400000 | 2.29E+08 | NA |
| 14600000 | 1.10E+07 | NA | NA | NA | 8533700  | 5093200  | 16300000 | NA |
| 57500000 | 37100000 | NA | NA | NA | 48800000 | 44100000 | 66300000 | NA |
| 17800000 | 10600000 | NA | NA | NA | 14100000 | 10800000 | 21600000 | NA |
| 51600000 | 44700000 | NA | NA | NA | 49200000 | 34300000 | 95200000 | NA |
| 32900000 | 44700000 | NA | NA | NA | 54400000 | 36800000 | 96100000 | NA |
| 42400000 | 2.10E+07 | NA | NA | NA | 41500000 | 2.10E+07 | 84700000 | NA |
| 2364800  | 7918600  | NA | NA | NA | 8286100  | 3576700  | 2358500  | NA |
| 3687500  | 12500000 | NA | NA | NA | 11600000 | 4066900  | 12600000 | NA |
| 38500000 | 33700000 | NA | NA | NA | 31100000 | 30800000 | 58100000 | NA |
| 31200000 | 16200000 | NA | NA | NA | 21700000 | 17400000 | 28800000 | NA |
| 14700000 | 20100000 | NA | NA | NA | 2.10E+07 | 11900000 | 31900000 | NA |
| 9332300  | 1.10E+07 | NA | NA | NA | 6700400  | 7331100  | 20900000 | NA |
| 0        | 0        | NA | NA | NA | 0        | 0        | 0        | NA |
| 91500000 | 80200000 | NA | NA | NA | 69700000 | 59600000 | 1.88E+08 | NA |
| 16200000 | 19500000 | NA | NA | NA | 25100000 | 14400000 | 43900000 | NA |
| 1.10E+07 | 12400000 | NA | NA | NA | 14900000 | 1.10E+07 | 20500000 | NA |
| 20900000 | 28500000 | NA | NA | NA | 31300000 | 22300000 | 51200000 | NA |
| 10100000 | 6629400  | NA | NA | NA | 6087700  | 1563900  | 8757000  | NA |
| 7849700  | 8535800  | NA | NA | NA | 8638100  | 9736200  | 13100000 | NA |
| 13500000 | 13800000 | NA | NA | NA | 11400000 | 7350000  | 24300000 | NA |
| 1.70E+07 | 21600000 | NA | NA | NA | 14700000 | 16700000 | 34600000 | NA |
| 6777700  | 14100000 | NA | NA | NA | 13300000 | 10700000 | 28900000 | NA |
| 2765000  | 4415800  | NA | NA | NA | 1937600  | 2001900  | 2934400  | NA |
| 10300000 | 3841700  | NA | NA | NA | 1833500  | 3314800  | 8935000  | NA |
| 595690   | 0        | NA | NA | NA | 493040   | 0        | 553430   | NA |
| 10100000 | 14800000 | NA | NA | NA | 23600000 | 10700000 | 23400000 | NA |
| 6589900  | 7357000  | NA | NA | NA | 9699900  | 8239200  | 13200000 | NA |
| 0        | 0        | NA | NA | NA | 18800000 | 0        | 22900000 | NA |
| 11200000 | 16800000 | NA | NA | NA | 16900000 | 11900000 | 40200000 | NA |
| 970300   | 4598400  | NA | NA | NA | 0        | 0        | 3269100  | NA |
| 6562300  | 8703400  | NA | NA | NA | 10900000 | 3138400  | 11400000 | NA |
| 12900000 | 18200000 | NA | NA | NA | 11900000 | 10300000 | 21500000 | NA |
| 14300000 | 11600000 | NA | NA | NA | 2562500  | 13800000 | 1.60E+07 | NA |

|          |          |    |    |    |          |          |          |    |
|----------|----------|----|----|----|----------|----------|----------|----|
| 8082800  | 2020600  | NA | NA | NA | 1630200  | 5330800  | 4659200  | NA |
| 0        | 0        | NA | NA | NA | 4.70E+07 | 0        | 0        | NA |
| 0        | 0        | NA | NA | NA | 0        | 0        | 2720300  | NA |
| 9329400  | 8564100  | NA | NA | NA | 5061900  | 6933900  | 19500000 | NA |
| 0        | 0        | NA | NA | NA | 2869000  | 792740   | 0        | NA |
| 0        | 3501000  | NA | NA | NA | 0        | 7214000  | 0        | NA |
| 7388000  | 7239900  | NA | NA | NA | 7711600  | 458310   | 19400000 | NA |
| 8760500  | 8611300  | NA | NA | NA | 9715900  | 3804400  | 28300000 | NA |
| 3697800  | 4639300  | NA | NA | NA | 11200000 | 3645800  | 10800000 | NA |
| 3281200  | 1239500  | NA | NA | NA | 1993900  | 1341800  | 3224200  | NA |
| 14700000 | 33700000 | NA | NA | NA | 22600000 | 20700000 | 40300000 | NA |
| 2441900  | 2436600  | NA | NA | NA | 1543900  | 987800   | 4187000  | NA |
| 6046400  | 6349900  | NA | NA | NA | 8404000  | 4727700  | 17500000 | NA |
| 7615000  | 6015600  | NA | NA | NA | 7898400  | 4502100  | 13100000 | NA |
| 14900000 | 13400000 | NA | NA | NA | 7944000  | 5368700  | 25200000 | NA |
| 1521300  | 992340   | NA | NA | NA | 1186500  | 280930   | 2403300  | NA |
| 5034800  | 8314000  | NA | NA | NA | 8216000  | 2032500  | 1.40E+07 | NA |
| 8619500  | 0        | NA | NA | NA | 4290600  | 43700000 | 17400000 | NA |
| 1023100  | 1577700  | NA | NA | NA | 657490   | 1260100  | 1832400  | NA |
| 2259100  | 7831900  | NA | NA | NA | 8211700  | 8775200  | 19100000 | NA |
| 5274400  | 8845200  | NA | NA | NA | 5335800  | 2704200  | 1.20E+07 | NA |
| 14300000 | 3069100  | NA | NA | NA | 11300000 | 2059600  | 21700000 | NA |
| 1366900  | 0        | NA | NA | NA | 0        | 588020   | 7355200  | NA |
| 1202900  | 863770   | NA | NA | NA | 981360   | 919900   | 2046200  | NA |
| 0        | 0        | NA | NA | NA | 0        | 0        | 0        | NA |
| 0        | 3125900  | NA | NA | NA | 0        | 0        | 2.66E+08 | NA |
| 1.70E+07 | 25600000 | NA | NA | NA | 20200000 | 16100000 | 37100000 | NA |
| 2887400  | 2577800  | NA | NA | NA | 3643700  | 1218100  | 8449000  | NA |
| 4619300  | 3921300  | NA | NA | NA | 5198800  | 2713200  | 8935100  | NA |
| 0        | 17500000 | NA | NA | NA | 13900000 | 0        | 0        | NA |
| 2125500  | 0        | NA | NA | NA | 480760   | 0        | 683280   | NA |
| 0        | 0        | NA | NA | NA | 0        | 0        | 0        | NA |
| 6172700  | 5722600  | NA | NA | NA | 5732900  | 3859700  | 12700000 | NA |
| 5969200  | 0        | NA | NA | NA | 2129900  | 745230   | 6146700  | NA |
| 0        | 1088200  | NA | NA | NA | 0        | 790130   | 8353300  | NA |
| 2205800  | 1668200  | NA | NA | NA | 0        | 1154400  | 5047600  | NA |
| 22500000 | 17700000 | NA | NA | NA | 19900000 | 16700000 | 27400000 | NA |
| 0        | 0        | NA | NA | NA | 0        | 0        | 0        | NA |
| 1074100  | 2310400  | NA | NA | NA | 0        | 2367800  | 11700000 | NA |
| 1852100  | 1968500  | NA | NA | NA | 438210   | 1576400  | 2561200  | NA |
| 1910300  | 0        | NA | NA | NA | 2270700  | 3886900  | 5170300  | NA |
| 4349900  | 2417800  | NA | NA | NA | 3335100  | 3183600  | 4195100  | NA |
| 15400000 | 4066100  | NA | NA | NA | 5929400  | 3289500  | 18300000 | NA |
| 0        | 0        | NA | NA | NA | 0        | 0        | 0        | NA |
| 19100000 | 3994200  | NA | NA | NA | 3487700  | 11100000 | 4285400  | NA |
| 3768400  | 5604800  | NA | NA | NA | 0        | 4773800  | 11100000 | NA |
| 9504200  | 1884000  | NA | NA | NA | 7907300  | 5722100  | 1.70E+07 | NA |

|          |             |    |    |          |          |             |
|----------|-------------|----|----|----------|----------|-------------|
| 0        | 0 NA        | NA | NA | 0        | 0        | 2339200 NA  |
| 0        | 6224600 NA  | NA | NA | 188600   | 0        | 259540 NA   |
| 0        | 3267500 NA  | NA | NA | 2524200  | 3810800  | 5428000 NA  |
| 509070   | 540120 NA   | NA | NA | 0        | 0        | 746080 NA   |
| 363460   | 0 NA        | NA | NA | 430140   | 428590   | 0 NA        |
| 12900000 | 5506000 NA  | NA | NA | 12100000 | 8449600  | 22700000 NA |
| 0        | 0 NA        | NA | NA | 4876300  | 1574200  | 0 NA        |
| 0        | 6133700 NA  | NA | NA | 2932100  | 0        | 4721800 NA  |
| 367000   | 0 NA        | NA | NA | 0        | 0        | 0 NA        |
| 0        | 0 NA        | NA | NA | 0        | 0        | 1.89E+08 NA |
| 0        | 5276200 NA  | NA | NA | 0        | 5968200  | 0 NA        |
| 4682200  | 851170 NA   | NA | NA | 2487600  | 699600   | 5163200 NA  |
| 2924000  | 4139500 NA  | NA | NA | 0        | 0        | 1965500 NA  |
| 13300000 | 15700000 NA | NA | NA | 9699300  | 9323400  | 26900000 NA |
| 5122200  | 14700000 NA | NA | NA | 3901300  | 2378700  | 6386600 NA  |
| 13100000 | 1.40E+07 NA | NA | NA | 13300000 | 7387600  | 25400000 NA |
| 2249000  | 1614100 NA  | NA | NA | 1743500  | 690630   | 6094300 NA  |
| 0        | 3335800 NA  | NA | NA | 1516100  | 2095000  | 3332100 NA  |
| 0        | 0 NA        | NA | NA | 0        | 0        | 1554300 NA  |
| 0        | 0 NA        | NA | NA | 0        | 0        | 0 NA        |
| 20300000 | 22700000 NA | NA | NA | 17100000 | 13300000 | 21200000 NA |
| 4781300  | 5088000 NA  | NA | NA | 4498600  | 1710100  | 4959600 NA  |
| 659940   | 0 NA        | NA | NA | 508460   | 0        | 1280600 NA  |
| 3782100  | 3920400 NA  | NA | NA | 3754900  | 1805400  | 12100000 NA |
| 8531900  | 1521800 NA  | NA | NA | 3764800  | 3871900  | 8259400 NA  |
| 0        | 0 NA        | NA | NA | 0        | 0        | 0 NA        |
| 4781600  | 5654300 NA  | NA | NA | 6498000  | 2414500  | 9920900 NA  |
| 0        | 0 NA        | NA | NA | 0        | 0        | 0 NA        |
| 4876100  | 2743700 NA  | NA | NA | 1938900  | 1689800  | 7005000 NA  |
| 460090   | 2799900 NA  | NA | NA | 3514200  | 2849400  | 6897600 NA  |
| 0        | 0 NA        | NA | NA | 0        | 0        | 0 NA        |
| 1838700  | 8892000 NA  | NA | NA | 1599700  | 1314100  | 842140 NA   |
| 1799500  | 3669200 NA  | NA | NA | 4248100  | 2062700  | 7068900 NA  |
| 5646900  | 5599400 NA  | NA | NA | 3118200  | 2003000  | 8140700 NA  |
| 0        | 8455500 NA  | NA | NA | 437490   | 207130   | 0 NA        |
| 0        | 1856700 NA  | NA | NA | 1164000  | 663300   | 761420 NA   |
| 0        | 0 NA        | NA | NA | 0        | 0        | 0 NA        |
| 0        | 0 NA        | NA | NA | 0        | 2275600  | 5846800 NA  |
| 2517300  | 1016800 NA  | NA | NA | 1110000  | 899520   | 1688100 NA  |
| 17100000 | 4371500 NA  | NA | NA | 3654800  | 2119100  | 12900000 NA |
| 0        | 0 NA        | NA | NA | 0        | 0        | 0 NA        |
| 9700600  | 3428400 NA  | NA | NA | 0        | 0        | 14700000 NA |
| 0        | 366740 NA   | NA | NA | 712960   | 621070   | 678110 NA   |
| 3419000  | 3117000 NA  | NA | NA | 802420   | 627500   | 6697400 NA  |
| 4376100  | 2483700 NA  | NA | NA | 4667300  | 0        | 3254100 NA  |
| 4136000  | 2580100 NA  | NA | NA | 1280900  | 1556600  | 3059000 NA  |
| 1744700  | 1445200 NA  | NA | NA | 1422900  | 991630   | 2287900 NA  |

|          |          |    |    |          |          |          |    |
|----------|----------|----|----|----------|----------|----------|----|
| 0        | 716150   | NA | NA | 710720   | 274300   | 1218600  | NA |
| 3267600  | 1396100  | NA | NA | 0        | 0        | 3942400  | NA |
| 0        | 0        | NA | NA | 0        | 3501900  | 0        | NA |
| 0        | 0        | NA | NA | 0        | 0        | 0        | NA |
| 0        | 0        | NA | NA | 0        | 0        | 0        | NA |
| 0        | 483710   | NA | NA | 0        | 0        | 0        | NA |
| 0        | 0        | NA | NA | 0        | 0        | 0        | NA |
| 1834000  | 1723900  | NA | NA | 1273600  | 3206100  | 6773100  | NA |
| 1.60E+07 | 2.00E+07 | NA | NA | 19700000 | 13800000 | 36600000 | NA |
| 1226500  | 3549400  | NA | NA | 1621800  | 1314600  | 2523700  | NA |
| 4018200  | 3906400  | NA | NA | 2272900  | 1543600  | 4257700  | NA |
| 0        | 0        | NA | NA | 0        | 9152500  | 0        | NA |
| 933620   | 2492900  | NA | NA | 3028200  | 3023100  | 6457700  | NA |
| 0        | 0        | NA | NA | 0        | 0        | 0        | NA |
| 0        | 0        | NA | NA | 0        | 0        | 0        | NA |
| 9606400  | 8626100  | NA | NA | 7799800  | 8062500  | 16400000 | NA |
| 1653300  | 1982600  | NA | NA | 0        | 0        | 0        | NA |
| 1861000  | 1279000  | NA | NA | 1604600  | 1916100  | 0        | NA |
| 6247400  | 0        | NA | NA | 0        | 0        | 8121200  | NA |
| 1046800  | 1070000  | NA | NA | 654330   | 567130   | 280030   | NA |
| 0        | 0        | NA | NA | 1425700  | 0        | 0        | NA |
| 0        | 0        | NA | NA | 0        | 0        | 0        | NA |
| 0        | 466250   | NA | NA | 6259400  | 0        | 647910   | NA |
| 0        | 1935900  | NA | NA | 2511100  | 1367500  | 3730100  | NA |
| 3107200  | 2198800  | NA | NA | 1780000  | 819420   | 3046700  | NA |
| 0        | 0        | NA | NA | 0        | 0        | 6290800  | NA |
| 0        | 0        | NA | NA | 0        | 0        | 0        | NA |
| 1072800  | 0        | NA | NA | 0        | 4028500  | 0        | NA |
| 722570   | 0        | NA | NA | 0        | 48073    | 580670   | NA |
| 0        | 28300000 | NA | NA | 0        | 0        | 0        | NA |
| 0        | 0        | NA | NA | 313980   | 1863800  | 584930   | NA |
| 1255000  | 0        | NA | NA | 0        | 0        | 0        | NA |
| 0        | 0        | NA | NA | 0        | 0        | 0        | NA |
| 0        | 0        | NA | NA | 0        | 0        | 0        | NA |
| 0        | 0        | NA | NA | 0        | 0        | 0        | NA |
| 0        | 0        | NA | NA | 0        | 0        | 0        | NA |
| 3281900  | 0        | NA | NA | 0        | 0        | 6875800  | NA |
| 4307300  | 8082600  | NA | NA | 12600000 | 7896100  | 21300000 | NA |
| 0        | 0        | NA | NA | 0        | 0        | 0        | NA |
| 0        | 849940   | NA | NA | 0        | 0        | 0        | NA |
| 0        | 0        | NA | NA | 0        | 0        | 0        | NA |
| 0        | 0        | NA | NA | 0        | 666960   | 2065300  | NA |
| 0        | 0        | NA | NA | 0        | 0        | 0        | NA |
| 0        | 592000   | NA | NA | 0        | 0        | 0        | NA |
| 2697400  | 0        | NA | NA | 1382600  | 1142200  | 2277000  | NA |
| 1653900  | 2590500  | NA | NA | 0        | 0        | 0        | NA |
| 0        | 7198000  | NA | NA | 0        | 3522600  | 0        | NA |



|          |             |    |    |          |          |             |
|----------|-------------|----|----|----------|----------|-------------|
| 955040   | 0 NA        | NA | NA | 0        | 0        | 0 NA        |
| 0        | 0 NA        | NA | NA | 0        | 0        | 1561700 NA  |
| 0        | 0 NA        | NA | NA | 4860600  | 4133200  | 18800000 NA |
| 0        | 0 NA        | NA | NA | 0        | 0        | 0 NA        |
| 0        | 2319500 NA  | NA | NA | 2762500  | 1446700  | 3914200 NA  |
| 1885600  | 1520000 NA  | NA | NA | 1979200  | 1269800  | 7027800 NA  |
| 3.31E+08 | 3.11E+08 NA | NA | NA | 3.83E+08 | 2.18E+08 | 7.61E+08 NA |
| 0        | 0 NA        | NA | NA | 0        | 0        | 0 NA        |
| 1602600  | 0 NA        | NA | NA | 0        | 1009700  | 2271000 NA  |
| 0        | 0 NA        | NA | NA | 0        | 0        | 0 NA        |
| 6596900  | 0 NA        | NA | NA | 6979500  | 0        | 0 NA        |
| 9.80E+08 | 2.34E+09 NA | NA | NA | 2.01E+09 | 1.52E+09 | 1.28E+09 NA |
| 3994600  | 946810 NA   | NA | NA | 0        | 1465000  | 5762300 NA  |
| 0        | 0 NA        | NA | NA | 0        | 0        | 1508400 NA  |
| 0        | 0 NA        | NA | NA | 0        | 0        | 0 NA        |
| 0        | 0 NA        | NA | NA | 0        | 0        | 0 NA        |
| 0        | 0 NA        | NA | NA | 0        | 0        | 0 NA        |
| 2603600  | 0 NA        | NA | NA | 0        | 0        | 0 NA        |
| 0        | 0 NA        | NA | NA | 0        | 0        | 0 NA        |
| 2396300  | 4239300 NA  | NA | NA | 3732400  | 1476800  | 3382000 NA  |
| 683780   | 418770 NA   | NA | NA | 1172900  | 435970   | 942170 NA   |
| 1148500  | 728340 NA   | NA | NA | 1637300  | 928700   | 2545800 NA  |
| 2189300  | 2325100 NA  | NA | NA | 2226000  | 0        | 4906300 NA  |
| 3011900  | 955690 NA   | NA | NA | 945670   | 1089100  | 4856500 NA  |
| 0        | 0 NA        | NA | NA | 0        | 0        | 0 NA        |
| 0        | 0 NA        | NA | NA | 0        | 0        | 0 NA        |
| 0        | 0 NA        | NA | NA | 0        | 0        | 0 NA        |
| 1045100  | 0 NA        | NA | NA | 0        | 0        | 2077800 NA  |
| 0        | 0 NA        | NA | NA | 0        | 0        | 0 NA        |
| 1268400  | 0 NA        | NA | NA | 0        | 0        | 0 NA        |
| 0        | 0 NA        | NA | NA | 7926100  | 0        | 0 NA        |
| 0        | 0 NA        | NA | NA | 0        | 0        | 0 NA        |
| 0        | 0 NA        | NA | NA | 0        | 0        | 0 NA        |
| 3687300  | 0 NA        | NA | NA | 0        | 0        | 0 NA        |
| 0        | 0 NA        | NA | NA | 0        | 0        | 0 NA        |
| 0        | 0 NA        | NA | NA | 0        | 0        | 0 NA        |
| 0        | 1205200 NA  | NA | NA | 0        | 822040   | 3157300 NA  |
| 1618600  | 456070 NA   | NA | NA | 483340   | 0        | 862820 NA   |
| 0        | 0 NA        | NA | NA | 0        | 0        | 0 NA        |
| 0        | 0 NA        | NA | NA | 6763200  | 0        | 0 NA        |
| 0        | 0 NA        | NA | NA | 0        | 0        | 0 NA        |
| 2202900  | 0 NA        | NA | NA | 0        | 1089100  | 3032000 NA  |
| 1106200  | 0 NA        | NA | NA | 0        | 0        | 273300 NA   |
| 0        | 0 NA        | NA | NA | 0        | 0        | 0 NA        |
| 0        | 2449400 NA  | NA | NA | 436810   | 0        | 0 NA        |
| 16300000 | 2101000 NA  | NA | NA | 2620200  | 2580900  | 4285400 NA  |
| 0        | 0 NA        | NA | NA | 27400000 | 0        | 0 NA        |

|          |             |    |    |          |          |             |
|----------|-------------|----|----|----------|----------|-------------|
| 0        | 0 NA        | NA | NA | 1319700  | 0        | 2785500 NA  |
| 0        | 0 NA        | NA | NA | 0        | 0        | 4729200 NA  |
| 0        | 0 NA        | NA | NA | 0        | 0        | 0 NA        |
| 0        | 0 NA        | NA | NA | 0        | 0        | 0 NA        |
| 0        | 0 NA        | NA | NA | 0        | 0        | 0 NA        |
| 0        | 0 NA        | NA | NA | 0        | 0        | 0 NA        |
| 0        | 0 NA        | NA | NA | 0        | 0        | 0 NA        |
| 0        | 0 NA        | NA | NA | 0        | 0        | 0 NA        |
| 0        | 0 NA        | NA | NA | 4333200  | 0        | 9132100 NA  |
| 3700400  | 3983000 NA  | NA | NA | 4499500  | 3823400  | 7271800 NA  |
| 0        | 0 NA        | NA | NA | 0        | 0        | 0 NA        |
| 0        | 0 NA        | NA | NA | 0        | 0        | 0 NA        |
| 0        | 0 NA        | NA | NA | 0        | 0        | 4206700 NA  |
| 0        | 0 NA        | NA | NA | 0        | 0        | 0 NA        |
| 0        | 0 NA        | NA | NA | 0        | 0        | 0 NA        |
| 0        | 4841300 NA  | NA | NA | 6014000  | 4054100  | 13700000 NA |
| 0        | 0 NA        | NA | NA | 0        | 0        | 0 NA        |
| 0        | 0 NA        | NA | NA | 0        | 0        | 347660 NA   |
| 0        | 396240 NA   | NA | NA | 0        | 0        | 1632800 NA  |
| 0        | 0 NA        | NA | NA | 0        | 0        | 0 NA        |
| 0        | 0 NA        | NA | NA | 0        | 0        | 0 NA        |
| 0        | 0 NA        | NA | NA | 0        | 0        | 0 NA        |
| 0        | 0 NA        | NA | NA | 0        | 0        | 0 NA        |
| 0        | 0 NA        | NA | NA | 1166900  | 0        | 0 NA        |
| 0        | 0 NA        | NA | NA | 647380   | 412850   | 6662900 NA  |
| 0        | 0 NA        | NA | NA | 6.03E+08 | 8497500  | 0 NA        |
| 0        | 5276200 NA  | NA | NA | 0        | 3940400  | 0 NA        |
| 0        | 0 NA        | NA | NA | 0        | 0        | 0 NA        |
| 0        | 0 NA        | NA | NA | 0        | 0        | 0 NA        |
| 0        | 0 NA        | NA | NA | 0        | 0        | 0 NA        |
| 0        | 0 NA        | NA | NA | 0        | 0        | 0 NA        |
| 15200000 | 16600000 NA | NA | NA | 16300000 | 7424000  | 3.00E+07 NA |
| 0        | 0 NA        | NA | NA | 0        | 0        | 0 NA        |
| 0        | 0 NA        | NA | NA | 7.67E+08 | 0        | 0 NA        |
| 824510   | 0 NA        | NA | NA | 0        | 0        | 0 NA        |
| 41400000 | 36500000 NA | NA | NA | 43500000 | 33800000 | 7.20E+07 NA |
| 0        | 0 NA        | NA | NA | 0        | 0        | 0 NA        |
| 0        | 0 NA        | NA | NA | 0        | 0        | 0 NA        |
| 0        | 0 NA        | NA | NA | 0        | 0        | 0 NA        |
| 0        | 0 NA        | NA | NA | 0        | 0        | 0 NA        |
| 0        | 0 NA        | NA | NA | 0        | 0        | 0 NA        |
| 14500000 | 6242100 NA  | NA | NA | 6464300  | 4343300  | 10800000 NA |
| 0        | 0 NA        | NA | NA | 0        | 0        | 0 NA        |
| 0        | 0 NA        | NA | NA | 0        | 0        | 0 NA        |
| 4876100  | 2743700 NA  | NA | NA | 1938900  | 1689800  | 7005000 NA  |
| 2066000  | 7240700 NA  | NA | NA | 8339700  | 5023400  | 15300000 NA |
| 3106200  | 2630500 NA  | NA | NA | 3463700  | 1769600  | 6289300 NA  |

|          |          |          |          |          |          |          |          |          |
|----------|----------|----------|----------|----------|----------|----------|----------|----------|
| 0        | 0        | NA       | NA       | NA       | 0        | 0        | 2877100  | NA       |
| 0        | 0        | NA       | NA       | NA       | 0        | 0        | 0        | NA       |
| 0        | 0        | NA       | NA       | NA       | 0        | 0        | 0        | NA       |
| 0        | 0        | NA       | NA       | NA       | 0        | 0        | 0        | NA       |
| 0        | 0        | NA       | NA       | NA       | 0        | 0        | 0        | NA       |
| 0        | 0        | NA       | NA       | NA       | 0        | 0        | 0        | NA       |
| 0        | 0        | NA       | NA       | NA       | 0        | 0        | 0        | NA       |
| 2204300  | 0        | NA       | NA       | NA       | 0        | 0        | 3634000  | NA       |
| 4883300  | 5327600  | NA       | NA       | NA       | 4374500  | 5352500  | 10600000 | NA       |
| 0        | 0        | NA       | NA       | NA       | 0        | 0        | 0        | NA       |
| 0        | 0        | NA       | NA       | NA       | 0        | 0        | 0        | NA       |
| 4140900  | 0        | NA       | NA       | NA       | 1360800  | 1671200  | 8231900  | NA       |
| 7467700  | 6527800  | NA       | NA       | NA       | 0        | 5251400  | 16600000 | NA       |
| 0        | 0        | NA       | NA       | NA       | 0        | 0        | 0        | NA       |
| 0        | 0        | NA       | NA       | NA       | 0        | 0        | 2382300  | NA       |
| 1361100  | 1047300  | NA       | NA       | NA       | 1015200  | 612520   | 4776400  | NA       |
| 5076700  | 27700000 | NA       | NA       | NA       | 0        | 8260600  | 18300000 | NA       |
| NA       | NA       | 55900000 | 40400000 | 49300000 | NA       | NA       | NA       | 44800000 |
| 0        | 0        | NA       | NA       | NA       | 0        | 0        | 0        | NA       |
| 9022700  | 8198800  | NA       | NA       | NA       | 2573400  | 3261000  | 8845800  | NA       |
| NA       | NA       | 1465200  | 1603900  | 1506800  | NA       | NA       | NA       | 1373300  |
| 793180   | 0        | NA       | NA       | NA       | 0        | 0        | 0        | NA       |
| NA       | NA       | 0        | 1605100  | 310320   | NA       | NA       | NA       | 0        |
| NA       | NA       | 0        | 0        | 0        | NA       | NA       | NA       | 0        |
| 5864300  | 0        | NA       | NA       | NA       | 0        | 2683400  | 0        | NA       |
| 526880   | 1782200  | NA       | NA       | NA       | 1010000  | 1447500  | 1355100  | NA       |
| NA       | NA       | 1.01E+08 | 1.26E+08 | 1.21E+08 | NA       | NA       | NA       | 1.30E+08 |
| NA       | NA       | 12500000 | 4934400  | 0        | NA       | NA       | NA       | 6307800  |
| NA       | NA       | 6715800  | 0        | 0        | NA       | NA       | NA       | 2513100  |
| 5336000  | 8132300  | NA       | NA       | NA       | 6547900  | 0        | 0        | NA       |
| NA       | NA       | 1.10E+09 | 1.09E+09 | 1.31E+09 | NA       | NA       | NA       | 1.26E+09 |
| 3412900  | 4465600  | NA       | NA       | NA       | 7571200  | 2666900  | 8064300  | NA       |
| NA       | NA       | 0        | 0        | 0        | NA       | NA       | NA       | 0        |
| NA       | NA       | 2.56E+08 | 2.14E+08 | 3.81E+08 | NA       | NA       | NA       | 3.93E+08 |
| 7147300  | 7093300  | NA       | NA       | NA       | 8545800  | 8005400  | 17200000 | NA       |
| 14700000 | 1.30E+07 | 24600000 | 19400000 | 34400000 | 11700000 | 11700000 | 26600000 | 41100000 |
| 12800000 | 13600000 | NA       | NA       | NA       | 12500000 | 8742200  | 29800000 | NA       |
| NA       | NA       | 91900000 | 79800000 | 94500000 | NA       | NA       | NA       | 1.39E+08 |
| NA       | NA       | 0        | 6239300  | 15400000 | NA       | NA       | NA       | 6933400  |
| NA       | NA       | 0        | 2576200  | 4465300  | NA       | NA       | NA       | 2770100  |
| 0        | 0        | NA       | NA       | NA       | 1294500  | 1697600  | 320370   | NA       |
| NA       | NA       | 8086200  | 6872800  | 14200000 | NA       | NA       | NA       | 6720300  |
| NA       | NA       | 0        | 0        | 19200000 | NA       | NA       | NA       | 12200000 |
| NA       | NA       | 6.43E+08 | 5.94E+08 | 8.05E+08 | NA       | NA       | NA       | 8.48E+08 |
| 20900000 | 20100000 | NA       | NA       | NA       | 17700000 | 12700000 | 3.50E+07 | NA       |
| 813090   | 712720   | NA       | NA       | NA       | 722960   | 473920   | 1186000  | NA       |
| 3568700  | 4881900  | NA       | NA       | NA       | 3087900  | 2874900  | 6857400  | NA       |

|    |    |          |          |          |    |    |    |          |
|----|----|----------|----------|----------|----|----|----|----------|
| NA | NA | 10700000 | 7742600  | 11200000 | NA | NA | NA | 2255900  |
| NA | NA | 7090600  | 10200000 | 11600000 | NA | NA | NA | 15300000 |
| NA | NA | 21300000 | 28700000 | 71400000 | NA | NA | NA | 67500000 |
| NA | NA | 0        | 6830300  | 21300000 | NA | NA | NA | 23200000 |
| 0  | 0  | NA       | NA       | NA       | 0  | 0  | 0  | NA       |

FFPE\_SDS.I FFPE\_SDS.I FFPE\_SDS.I FFPE\_SDS.I FFPE\_SDS.MAX

| F6.1.M   | F9.1.M   | F2.2.M   | F6.2.M   | F9.2.M   |
|----------|----------|----------|----------|----------|
| 1.87E+09 | 1.87E+09 | 4.18E+09 | 1.04E+09 | 9.36E+08 |
| 3.78E+09 | 4.76E+09 | 2.60E+09 | 2.50E+09 | 1.88E+09 |
| 7.92E+09 | 9.47E+09 | 4.48E+09 | 4.56E+09 | 3.55E+09 |
| 2.58E+09 | 3.01E+09 | 1.20E+09 | 1.43E+09 | 9.85E+08 |
| 2.97E+09 | 3.72E+09 | 1.99E+09 | 2.22E+09 | 1.42E+09 |
| 2.98E+09 | 9.79E+08 | 4.47E+08 | 2.02E+09 | 4.08E+08 |
| 4.51E+09 | 2.20E+09 | 2.67E+09 | 2.44E+09 | 8.70E+08 |
| 1.05E+10 | 1.18E+10 | 6.37E+09 | 6.10E+09 | 4.16E+09 |
| 2.27E+09 | 3.24E+09 | 1.79E+09 | 1.53E+09 | 1.09E+09 |
| 1.32E+09 | 1.69E+09 | 9.36E+08 | 1.00E+09 | 6.85E+08 |
| 2.90E+09 | 3.83E+09 | 1.94E+09 | 1.93E+09 | 1.55E+09 |
| 1.27E+09 | 2.53E+09 | 3.78E+09 | 8.01E+08 | 1.08E+09 |
| 2.66E+09 | 3.15E+09 | 1.44E+09 | 1.48E+09 | 1.14E+09 |
| 1.81E+09 | 2.41E+09 | 9.32E+08 | 8.86E+08 | 8.30E+08 |
| 1.56E+09 | 1.78E+09 | 6.11E+08 | 6.75E+08 | 5.26E+08 |
| 2.09E+08 | 3.33E+08 | 1.82E+08 | 1.43E+08 | 1.53E+08 |
| 4.60E+08 | 6.27E+08 | 2.87E+08 | 2.74E+08 | 2.30E+08 |
| 2.75E+09 | 3.04E+09 | 1.65E+09 | 1.67E+09 | 1.21E+09 |
| 4.33E+08 | 4.71E+08 | 3.38E+08 | 3.33E+08 | 2.47E+08 |
| 9.47E+08 | 9.36E+08 | 5.94E+08 | 4.54E+08 | 3.99E+08 |
| 1.22E+09 | 1.25E+09 | 6.45E+08 | 6.54E+08 | 5.39E+08 |
| 2.00E+09 | 2.32E+09 | 9.70E+08 | 1.01E+09 | 7.82E+08 |
| 6.98E+08 | 7.48E+08 | 3.80E+08 | 3.88E+08 | 2.86E+08 |
| 1.69E+09 | 1.76E+09 | 6.86E+08 | 8.38E+08 | 6.51E+08 |
| 1.40E+09 | 2.52E+09 | 6.66E+08 | 7.63E+08 | 5.94E+08 |
| 1.02E+09 | 1.19E+09 | 6.40E+08 | 5.74E+08 | 3.93E+08 |
| 3.64E+08 | 5.17E+08 | 2.30E+08 | 2.38E+08 | 1.82E+08 |
| 1.73E+09 | 2.40E+09 | 1.19E+09 | 1.39E+09 | 1.11E+09 |
| 1.43E+09 | 1.75E+09 | 8.06E+08 | 7.94E+08 | 6.25E+08 |
| 1.81E+09 | 1.57E+09 | 1.02E+09 | 1.11E+09 | 7.22E+08 |
| 3.26E+08 | 3.55E+08 | 2.09E+08 | 1.88E+08 | 1.31E+08 |
| 1.85E+09 | 2.28E+09 | 8.70E+08 | 9.71E+08 | 6.87E+08 |
| 9.22E+08 | 1.09E+09 | 5.93E+08 | 5.64E+08 | 4.51E+08 |
| 6.43E+08 | 6.96E+08 | 3.75E+08 | 4.11E+08 | 2.74E+08 |
| 9.46E+08 | 8.80E+08 | 6.06E+08 | 6.63E+08 | 4.28E+08 |
| 3.59E+08 | 4.62E+08 | 1.87E+08 | 2.16E+08 | 1.82E+08 |
| 3.30E+08 | 3.99E+08 | 1.88E+08 | 1.63E+08 | 1.34E+08 |
| 9.89E+08 | 1.16E+09 | 4.51E+08 | 5.02E+08 | 4.64E+08 |
| 6.31E+08 | 6.71E+08 | 3.80E+08 | 3.95E+08 | 2.75E+08 |
| 4.80E+08 | 5.46E+08 | 1.59E+08 | 1.50E+08 | 1.24E+08 |
| 1.87E+08 | 1.93E+08 | 1.25E+08 | 98900000 | 78800000 |
| 1.25E+08 | 1.39E+08 | 1.16E+08 | 1.24E+08 | 71500000 |
| 4.42E+08 | 5.27E+08 | 3.16E+08 | 2.79E+08 | 2.16E+08 |
| 83300000 | 1.34E+08 | 2.30E+07 | 38900000 | 3.70E+07 |
| 7.03E+08 | 8.19E+08 | 3.75E+08 | 3.42E+08 | 3.37E+08 |

|          |          |          |          |          |
|----------|----------|----------|----------|----------|
| 0        | 0        | 2251400  | 0        | 0        |
| 3.82E+08 | 3.90E+08 | 2.21E+08 | 2.20E+08 | 1.70E+08 |
| 5.89E+08 | 6.62E+08 | 3.68E+08 | 3.26E+08 | 2.41E+08 |
| 1.01E+09 | 1.54E+09 | 7.23E+08 | 6.99E+08 | 5.16E+08 |
| 1.84E+08 | 1.95E+08 | 1.43E+08 | 1.28E+08 | 50500000 |
| 1.34E+08 | 1.61E+08 | 85800000 | 95100000 | 60200000 |
| 3.00E+08 | 3.22E+08 | 2.37E+08 | 1.90E+08 | 1.50E+08 |
| 1.37E+08 | 1.52E+08 | 88400000 | 84700000 | 43200000 |
| 2.46E+08 | 2.98E+08 | 1.25E+08 | 1.28E+08 | 88600000 |
| 3.21E+08 | 3.82E+08 | 1.45E+08 | 1.82E+08 | 1.39E+08 |
| 5302400  | 5.00E+07 | 4303700  | 0        | 12800000 |
| 2.73E+08 | 3.24E+08 | 2.30E+08 | 1.88E+08 | 1.24E+08 |
| 3.27E+08 | 6.43E+08 | 2.33E+08 | 2.21E+08 | 1.90E+08 |
| 3.04E+08 | 3.70E+08 | 2.79E+08 | 2.48E+08 | 1.88E+08 |
| 1.17E+09 | 1.44E+09 | 1.14E+09 | 9.62E+08 | 5.59E+08 |
| 1.96E+08 | 2.21E+08 | 1.01E+08 | 1.37E+08 | 76600000 |
| 7.00E+07 | 1.16E+08 | 58200000 | 5.80E+07 | 46300000 |
| 1.53E+08 | 1.90E+08 | 1.02E+08 | 93400000 | 61600000 |
| 82900000 | 98500000 | 42400000 | 52500000 | 41500000 |
| 95400000 | 1.37E+08 | 92300000 | 85900000 | 47500000 |
| 3.52E+08 | 3.43E+08 | 1.68E+08 | 2.26E+08 | 1.61E+08 |
| 1.34E+08 | 1.84E+08 | 1.04E+08 | 75400000 | 70200000 |
| 2.64E+08 | 3.28E+08 | 1.60E+08 | 1.67E+08 | 1.33E+08 |
| 2.65E+08 | 3.75E+08 | 1.63E+08 | 1.28E+08 | 1.11E+08 |
| 1.90E+08 | 2.55E+08 | 74500000 | 6.70E+07 | 70300000 |
| 6132300  | 2536500  | 16100000 | 0        | 1659000  |
| 1.67E+09 | 1.94E+09 | 1.34E+09 | 1.39E+09 | 8.37E+08 |
| 2.08E+08 | 2.15E+08 | 1.57E+08 | 1.34E+08 | 85500000 |
| 3.01E+08 | 3.70E+08 | 2.01E+08 | 1.87E+08 | 1.61E+08 |
| 2.73E+08 | 2.85E+08 | 1.77E+08 | 1.73E+08 | 1.13E+08 |
| 0        | 0        | 0        | 0        | 0        |
| 48800000 | 62400000 | 32800000 | 42400000 | 24400000 |
| 1.01E+09 | 6.96E+08 | 8.26E+08 | 4.41E+08 | 3.08E+08 |
| 1.95E+08 | 4.00E+08 | 1.65E+08 | 1.88E+08 | 1.30E+08 |
| 5.80E+07 | 85900000 | 45500000 | 20800000 | 25800000 |
| 2.03E+08 | 2.83E+08 | 1.33E+08 | 1.09E+08 | 9.40E+07 |
| 93500000 | 1.29E+08 | 67400000 | 79300000 | 40300000 |
| 14800000 | 15300000 | 473810   | 8241800  | 7782600  |
| 1.77E+08 | 2.62E+08 | 1.29E+08 | 82600000 | 85600000 |
| 44500000 | 46500000 | 31100000 | 30900000 | 20800000 |
| 53600000 | 73600000 | 40600000 | 39400000 | 32900000 |
| 54700000 | 58100000 | 3.20E+07 | 47600000 | 24700000 |
| 2.09E+08 | 2.11E+08 | 1.69E+08 | 7.50E+07 | 79900000 |
| 51800000 | 89300000 | 45300000 | 53300000 | 3.20E+07 |
| 2.30E+08 | 2.93E+08 | 1.51E+08 | 1.33E+08 | 99900000 |
| 20200000 | 39300000 | 39100000 | 20700000 | 20800000 |
| 32500000 | 47200000 | 1.10E+07 | 5465000  | 0        |

|          |          |          |          |          |
|----------|----------|----------|----------|----------|
| 74800000 | 1.13E+08 | 69500000 | 59800000 | 37300000 |
| 33100000 | 27300000 | 12700000 | 23900000 | 20800000 |
| 1.30E+08 | 1.48E+08 | 62200000 | 56200000 | 42200000 |
| 4.00E+07 | 33700000 | 27500000 | 27100000 | 10300000 |
| 22200000 | 32500000 | 16800000 | 6029100  | 14700000 |
| 1.08E+08 | 1.51E+08 | 81600000 | 89600000 | 68900000 |
| 42900000 | 57300000 | 32300000 | 27400000 | 19500000 |
| 4.13E+08 | 3.04E+08 | 2.44E+08 | 2.30E+08 | 1.66E+08 |
| 72700000 | 55300000 | 43200000 | 41500000 | 28900000 |
| 15300000 | 0        | 0        | 0        | 2248300  |
| 3.72E+08 | 5.51E+08 | 1.85E+08 | 3.26E+08 | 2.06E+08 |
| 70300000 | 1.04E+08 | 61300000 | 46800000 | 47700000 |
| 1.71E+08 | 2.75E+08 | 1.48E+08 | 1.58E+08 | 1.16E+08 |
| 30300000 | 31900000 | 29200000 | 33100000 | 23500000 |
| 2.29E+08 | 2.49E+08 | 1.72E+08 | 1.53E+08 | 1.09E+08 |
| 2.76E+08 | 2.97E+08 | 1.52E+08 | 1.18E+08 | 88900000 |
| 1.27E+08 | 76300000 | 2.80E+07 | 83100000 | 28600000 |
| 1.26E+08 | 1.29E+08 | 99900000 | 97500000 | 59600000 |
| 1.32E+08 | 1.31E+08 | 81600000 | 77800000 | 41100000 |
| 2.45E+08 | 3.14E+08 | 1.34E+08 | 1.14E+08 | 1.18E+08 |
| 0        | 2339500  | 6999700  | 1487400  | 1168100  |
| 0        | 0        | 22500000 | 0        | 9151300  |
| 66900000 | 50800000 | 29300000 | 40900000 | 31300000 |
| 8.50E+07 | 58800000 | 74800000 | 77400000 | 59600000 |
| 62400000 | 7.40E+07 | 4.70E+07 | 44800000 | 36600000 |
| 50600000 | 9.20E+07 | 25900000 | 27900000 | 16800000 |
| 3.13E+08 | 2.30E+08 | 1.53E+08 | 1.26E+08 | 1.01E+08 |
| 2.36E+08 | 2.88E+08 | 1.28E+08 | 1.35E+08 | 1.07E+08 |
| 1.21E+08 | 95600000 | 4.70E+07 | 58900000 | 41300000 |
| 59300000 | 61200000 | 18700000 | 25800000 | 18400000 |
| 1.05E+08 | 1.53E+08 | 54100000 | 55100000 | 46800000 |
| 1.58E+08 | 1.34E+08 | 62300000 | 58400000 | 54300000 |
| 30300000 | 43700000 | 2.40E+07 | 25200000 | 12200000 |
| 25300000 | 5.20E+07 | 18800000 | 29600000 | 18100000 |
| 47300000 | 73500000 | 45500000 | 52100000 | 45100000 |
| 12200000 | 15700000 | 10500000 | 6947500  | 6423800  |
| 7.00E+07 | 79800000 | 37200000 | 29700000 | 19100000 |
| 50700000 | 54100000 | 31700000 | 42300000 | 29300000 |
| 30300000 | 75800000 | 26100000 | 22400000 | 12400000 |
| 1.64E+08 | 1.55E+08 | 1.45E+08 | 1.19E+08 | 62500000 |
| 71300000 | 1.02E+08 | 19900000 | 35700000 | 35800000 |
| 16200000 | 39600000 | 12800000 | 13100000 | 9574900  |
| 4020300  | 1848300  | 68300000 | 59300000 | 0        |
| 86200000 | 1.13E+08 | 76500000 | 56500000 | 36600000 |
| 3.70E+07 | 2.80E+07 | 11700000 | 19400000 | 8153800  |
| 23400000 | 52300000 | 20700000 | 2.00E+07 | 16200000 |
| 37200000 | 17800000 | 3929600  | 7722300  | 7631700  |

|          |          |          |          |          |
|----------|----------|----------|----------|----------|
| 6965900  | 18800000 | 0        | 2732200  | 1691000  |
| 21200000 | 27300000 | 6283600  | 10100000 | 2554600  |
| 13700000 | 23600000 | 13900000 | 9299100  | 13500000 |
| 34900000 | 39700000 | 22400000 | 28900000 | 14900000 |
| 1.51E+08 | 1.76E+08 | 90500000 | 6.50E+07 | 67600000 |
| 25400000 | 28500000 | 3516200  | 21600000 | 11800000 |
| 10500000 | 47300000 | 1.80E+07 | 8371800  | 1.10E+07 |
| 84300000 | 92700000 | 54900000 | 5.20E+07 | 36700000 |
| 0        | 0        | 0        | 0        | 0        |
| 69100000 | 3.50E+07 | 26500000 | 22600000 | 2235300  |
| 3.52E+08 | 4.08E+08 | 2.27E+08 | 2.19E+08 | 1.56E+08 |
| 50100000 | 48100000 | 44600000 | 28100000 | 23900000 |
| 16800000 | 17500000 | 9695700  | 10700000 | 2259700  |
| 2.12E+08 | 2.46E+08 | 1.18E+08 | 99800000 | 68100000 |
| 31500000 | 4.20E+07 | 3.80E+07 | 40700000 | 29500000 |
| 44400000 | 76900000 | 23200000 | 2.60E+07 | 14400000 |
| 36900000 | 21400000 | 17700000 | 18100000 | 12800000 |
| 7746200  | 7174400  | 0        | 0        | 2815700  |
| 5.20E+07 | 81500000 | 26500000 | 33300000 | 26200000 |
| 31600000 | 32500000 | 11900000 | 14700000 | 10300000 |
| 34200000 | 56600000 | 18200000 | 19300000 | 15400000 |
| 1.61E+08 | 1.31E+08 | 1.41E+08 | 1.33E+08 | 87400000 |
| 0        | 0        | 1959200  | 0        | 4238500  |
| 11700000 | 21100000 | 11100000 | 11500000 | 4362500  |
| 132210   | 438190   | 0        | 0        | 0        |
| 904760   | 0        | 0        | 0        | 0        |
| 40800000 | 59700000 | 13600000 | 23900000 | 29100000 |
| 33900000 | 31400000 | 16300000 | 20200000 | 9567300  |
| 28400000 | 39700000 | 32800000 | 23100000 | 21100000 |
| 0        | 0        | 0        | 0        | 0        |
| 83900000 | 6.60E+07 | 34400000 | 33800000 | 28800000 |
| 80200000 | 60400000 | 51400000 | 26600000 | 1.20E+07 |
| 32100000 | 6990300  | 20300000 | 16200000 | 7169200  |
| 93200000 | 6.20E+07 | 38900000 | 1.70E+07 | 1.80E+07 |
| 43700000 | 43400000 | 50100000 | 55700000 | 32900000 |
| 28300000 | 27800000 | 13800000 | 19900000 | 11600000 |
| 23500000 | 2.40E+07 | 21600000 | 10300000 | 12700000 |
| 15300000 | 19400000 | 8043400  | 10100000 | 8165200  |
| 1.70E+07 | 21300000 | 23600000 | 15900000 | 11900000 |
| 22400000 | 35100000 | 12900000 | 10700000 | 20600000 |
| 41600000 | 67300000 | 27800000 | 21600000 | 18700000 |
| 18500000 | 26100000 | 16700000 | 21500000 | 5026100  |
| 0        | 20800000 | 1152400  | 8494600  | 2282200  |
| 2.21E+08 | 72700000 | 3.13E+08 | 2.09E+08 | 1.33E+08 |
| 21300000 | 39900000 | 20300000 | 23400000 | 16400000 |
| 24500000 | 33600000 | 11300000 | 5861800  | 13900000 |
| 0        | 0        | 0        | 0        | 974980   |



|          |          |          |          |          |
|----------|----------|----------|----------|----------|
| 2.00E+07 | 42600000 | 2.10E+07 | 19700000 | 15300000 |
| 61200000 | 78500000 | 52600000 | 45100000 | 36500000 |
| 52300000 | 74200000 | 4.20E+07 | 43900000 | 3.10E+07 |
| 0        | 0        | 1.20E+07 | 2702800  | 0        |
| 6.50E+07 | 64200000 | 38500000 | 46800000 | 22100000 |
| 22500000 | 3.00E+07 | 16300000 | 15100000 | 1.40E+07 |
| 1513200  | 27200000 | 4590600  | 1080300  | 1910300  |
| 1.07E+08 | 1.62E+08 | 55900000 | 55900000 | 51600000 |
| 49800000 | 76600000 | 4.30E+07 | 25800000 | 19600000 |
| 1.50E+07 | 3269500  | 9661300  | 8819900  | 9926300  |
| 8838100  | 1.40E+07 | 1.20E+07 | 12500000 | 7155400  |
| 41500000 | 44700000 | 18100000 | 22400000 | 8723500  |
| 0        | 0        | 0        | 0        | 0        |
| 1.15E+08 | 1.14E+08 | 80300000 | 73900000 | 42100000 |
| 14500000 | 16200000 | 14600000 | 9293600  | 2410000  |
| 14800000 | 24500000 | 1.60E+07 | 12600000 | 6266200  |
| 38700000 | 53200000 | 1.70E+07 | 22100000 | 10900000 |
| 24400000 | 25400000 | 14100000 | 12200000 | 13300000 |
| 46800000 | 63600000 | 30300000 | 32300000 | 24900000 |
| 1.06E+08 | 1.32E+08 | 72800000 | 59800000 | 44100000 |
| 1.46E+08 | 1.24E+08 | 93700000 | 69700000 | 57900000 |
| 1.33E+08 | 1.60E+08 | 1.07E+08 | 46900000 | 5.50E+07 |
| 5.61E+08 | 18600000 | 7.57E+08 | 2.92E+08 | 1.71E+08 |
| 1.08E+08 | 91100000 | 50300000 | 32900000 | 23300000 |
| 74700000 | 73500000 | 29700000 | 26300000 | 22700000 |
| 48500000 | 26800000 | 11900000 | 19200000 | 26200000 |
| 0        | 0        | 1571500  | 1808800  | 1208500  |
| 28900000 | 10100000 | 41400000 | 40600000 | 16700000 |
| 39500000 | 37400000 | 15400000 | 16100000 | 6383100  |
| 0        | 0        | 0        | 0        | 0        |
| 20200000 | 32800000 | 7680300  | 10500000 | 8179400  |
| 27800000 | 34500000 | 37100000 | 23300000 | 21300000 |
| 4666800  | 5418100  | 0        | 0        | 5672800  |
| 0        | 0        | 194940   | 0        | 0        |
| 45600000 | 43600000 | 13300000 | 0        | 1759900  |
| 42300000 | 54500000 | 17100000 | 2.50E+07 | 25300000 |
| 27800000 | 32200000 | 26700000 | 22500000 | 13300000 |
| 20600000 | 23600000 | 1.80E+07 | 14100000 | 8222700  |
| 3865500  | 9913100  | 8548100  | 17300000 | 4090800  |
| 33400000 | 2.20E+07 | 5265300  | 19400000 | 9311800  |
| 88300000 | 1.07E+08 | 65500000 | 18300000 | 36200000 |
| 25400000 | 24400000 | 11300000 | 1.40E+07 | 13200000 |
| 80400000 | 92600000 | 63700000 | 54100000 | 36800000 |
| 23800000 | 30100000 | 17100000 | 20600000 | 17900000 |
| 0        | 0        | 0        | 0        | 0        |
| 1.23E+08 | 64300000 | 54600000 | 66700000 | 3.80E+07 |
| 2.10E+07 | 24500000 | 8473200  | 18900000 | 21400000 |

|          |          |          |          |          |
|----------|----------|----------|----------|----------|
| 10100000 | 8835200  | 4339600  | 10900000 | 3220500  |
| 22700000 | 3.00E+07 | 16500000 | 1.30E+07 | 11500000 |
| 0        | 0        | 0        | 4957700  | 523320   |
| 7985300  | 15100000 | 4668400  | 3852000  | 5091300  |
| 1.13E+08 | 1.30E+08 | 62800000 | 46800000 | 35400000 |
| 15400000 | 17400000 | 5744000  | 11600000 | 8260100  |
| 0        | 0        | 0        | 0        | 0        |
| 0        | 0        | 0        | 0        | 0        |
| 2367900  | 3643500  | 2828200  | 2637700  | 1346100  |
| 5.79E+09 | 8.74E+09 | 4.56E+09 | 2.09E+09 | 3.21E+09 |
| 46500000 | 44700000 | 26400000 | 30400000 | 22900000 |
| 13900000 | 12800000 | 10400000 | 6623700  | 8464400  |
| 33700000 | 3026600  | 17500000 | 0        | 1648900  |
| 27500000 | 45900000 | 22200000 | 21400000 | 17200000 |
| 29700000 | 17500000 | 26700000 | 12800000 | 8282200  |
| 16300000 | 27500000 | 15800000 | 21200000 | 18500000 |
| 0        | 10900000 | 0        | 7052500  | 0        |
| 10100000 | 7592100  | 9041400  | 9855300  | 4287800  |
| 16900000 | 34200000 | 10500000 | 15200000 | 10700000 |
| 12500000 | 10600000 | 10900000 | 6609800  | 7537000  |
| 12900000 | 21500000 | 10300000 | 10700000 | 1703800  |
| 5574400  | 8090000  | 6047000  | 7355700  | 3353300  |
| 15200000 | 14400000 | 8390700  | 3151800  | 7655300  |
| 0        | 3819300  | 1474200  | 9807000  | 3108700  |
| 9833600  | 15300000 | 2536300  | 14400000 | 5139300  |
| 1.65E+08 | 1.32E+08 | 88600000 | 97200000 | 70700000 |
| 2.80E+07 | 12500000 | 6738400  | 12200000 | 11700000 |
| 4161300  | 19700000 | 10500000 | 1104700  | 13300000 |
| 15800000 | 28500000 | 10100000 | 9864200  | 10600000 |
| 9412900  | 2604600  | 2721100  | 2333100  | 1061100  |
| 0        | 3778500  | 0        | 0        | 0        |
| 6270300  | 0        | 0        | 1877200  | 2004600  |
| 25100000 | 41300000 | 37900000 | 23300000 | 12300000 |
| 8368000  | 9314200  | 10100000 | 3902500  | 2927300  |
| 11100000 | 9413300  | 7382600  | 5943000  | 4096500  |
| 17700000 | 3.10E+07 | 13100000 | 4321600  | 5825900  |
| 9999100  | 4472200  | 4573000  | 0        | 4260100  |
| 0        | 0        | 0        | 0        | 0        |
| 0        | 1007500  | 0        | 3294100  | 2412800  |
| 8429800  | 9806800  | 9838800  | 10600000 | 4383200  |
| 4766800  | 14200000 | 5149500  | 4467100  | 2962100  |
| 6447400  | 12200000 | 6905400  | 6827200  | 4105100  |
| 12400000 | 12200000 | 8731300  | 6631100  | 4220400  |
| 4876900  | 0        | 0        | 0        | 0        |
| 10400000 | 13500000 | 4608100  | 9392100  | 4732100  |
| 41900000 | 4.40E+07 | 12300000 | 2.00E+07 | 17900000 |
| 1.10E+07 | 10400000 | 1.00E+07 | 8816600  | 5847100  |

|          |          |          |          |          |
|----------|----------|----------|----------|----------|
| 40500000 | 38700000 | 18700000 | 2.00E+07 | 15600000 |
| 63300000 | 88500000 | 39300000 | 32400000 | 25100000 |
| 31100000 | 41900000 | 23700000 | 25600000 | 19800000 |
| 465390   | 5787200  | 4316800  | 439120   | 2280500  |
| 12500000 | 6999200  | 8607000  | 7801700  | 5133700  |
| 0        | 0        | 1839000  | 0        | 0        |
| 23300000 | 20400000 | 13800000 | 20400000 | 10700000 |
| 3565700  | 3323900  | 0        | 0        | 1960500  |
| 17200000 | 12900000 | 7947300  | 2890600  | 5442500  |
| 21400000 | 9440200  | 4937100  | 7324300  | 11100000 |
| 0        | 0        | 4181000  | 982100   | 869920   |
| 0        | 13600000 | 2189100  | 8354600  | 5153900  |
| 0        | 0        | 0        | 0        | 0        |
| 2567100  | 18300000 | 4300400  | 9942300  | 1692200  |
| 5995400  | 1.20E+07 | 7367300  | 1094600  | 5467400  |
| 0        | 0        | 0        | 0        | 0        |
| 263800   | 881390   | 1319000  | 0        | 540380   |
| 12200000 | 11200000 | 7598900  | 8159400  | 5687400  |
| 11900000 | 11100000 | 4879800  | 2644700  | 0        |
| 77600000 | 59500000 | 19700000 | 28900000 | 14900000 |
| 1.00E+07 | 8399100  | 5613000  | 0        | 2317600  |
| 21800000 | 25200000 | 15800000 | 14200000 | 6497200  |
| 28500000 | 30200000 | 17200000 | 15100000 | 13600000 |
| 20200000 | 16200000 | 4159500  | 5267200  | 2679500  |
| 7564300  | 1.10E+07 | 6203600  | 3122800  | 2836300  |
| 10900000 | 16100000 | 19500000 | 10300000 | 1.10E+07 |
| 9785500  | 6282400  | 8294700  | 8356700  | 5163300  |
| 11500000 | 11700000 | 13600000 | 9133600  | 6206500  |
| 13800000 | 29600000 | 6852400  | 0        | 3004400  |
| 0        | 0        | 2143600  | 1820400  | 0        |
| 3.00E+07 | 38200000 | 27400000 | 27700000 | 14100000 |
| 38800000 | 56100000 | 23800000 | 0        | 16200000 |
| 7247000  | 19900000 | 10700000 | 9711600  | 4493200  |
| 4932900  | 9058600  | 7371300  | 6947500  | 7473800  |
| 3548000  | 0        | 0        | 445440   | 3091400  |
| 35600000 | 35400000 | 46600000 | 34700000 | 24200000 |
| 0        | 0        | 0        | 0        | 0        |
| 20300000 | 11500000 | 0        | 12200000 | 4395700  |
| 39200000 | 38900000 | 30400000 | 22800000 | 16900000 |
| 40200000 | 43600000 | 18300000 | 20800000 | 12200000 |
| 5884700  | 10300000 | 6133900  | 9737900  | 5857600  |
| 24600000 | 12500000 | 12200000 | 11700000 | 7608300  |
| 1.19E+08 | 1.91E+08 | 48500000 | 59700000 | 46800000 |
| 15300000 | 26700000 | 17300000 | 17800000 | 9539500  |
| 77500000 | 4531100  | 0        | 77700000 | 2542800  |
| 0        | 0        | 918460   | 0        | 0        |
| 1.10E+07 | 14400000 | 4422100  | 4216300  | 2399400  |

|          |          |          |          |          |
|----------|----------|----------|----------|----------|
| 8506400  | 13300000 | 826630   | 11200000 | 7903600  |
| 6352400  | 6517000  | 5766800  | 4236500  | 3439600  |
| 12700000 | 12700000 | 2745000  | 10800000 | 6293600  |
| 4873800  | 0        | 1747300  | 5833900  | 936150   |
| 7409100  | 9454900  | 4341600  | 4390000  | 3256300  |
| 17100000 | 12100000 | 5704800  | 4330600  | 2208600  |
| 1031800  | 27100000 | 1272000  | 19300000 | 12500000 |
| 2218100  | 5532200  | 2224200  | 7033700  | 2197900  |
| 0        | 0        | 0        | 0        | 0        |
| 2081300  | 2837000  | 3577000  | 0        | 0        |
| 0        | 0        | 2518000  | 0        | 0        |
| 779360   | 7367600  | 0        | 805940   | 695140   |
| 0        | 10600000 | 8221300  | 0        | 6743000  |
| 17200000 | 2.30E+07 | 2533000  | 10400000 | 4473700  |
| 0        | 9637900  | 2082900  | 2044500  | 1409300  |
| 22700000 | 30600000 | 14700000 | 13400000 | 11600000 |
| 31100000 | 23600000 | 4006800  | 14200000 | 9912100  |
| 11400000 | 1.20E+07 | 7543000  | 3810200  | 3234600  |
| 4836000  | 6879300  | 12200000 | 0        | 6602900  |
| 0        | 0        | 0        | 0        | 0        |
| 0        | 0        | 0        | 0        | 0        |
| 3962000  | 8826900  | 4708000  | 15100000 | 4827500  |
| 1456900  | 10300000 | 1385800  | 1386400  | 2252900  |
| 0        | 7230900  | 0        | 0        | 748250   |
| 48800000 | 54900000 | 22100000 | 22100000 | 1.10E+07 |
| 0        | 0        | 0        | 0        | 0        |
| 1178900  | 1360300  | 3278900  | 2385900  | 1414200  |
| 0        | 0        | 0        | 0        | 0        |
| 0        | 0        | 3134200  | 3137500  | 2467500  |
| 0        | 5.10E+07 | 0        | 0        | 0        |
| 0        | 0        | 0        | 0        | 0        |
| 1419100  | 1660200  | 1435500  | 2080000  | 1439300  |
| 24600000 | 14100000 | 8929300  | 15500000 | 6496700  |
| 0        | 0        | 0        | 3324500  | 2114500  |
| 8190200  | 1.30E+07 | 0        | 1333400  | 1292200  |
| 0        | 8135900  | 6234600  | 5716400  | 4367700  |
| 8122800  | 12200000 | 6877900  | 7165900  | 4996100  |
| 19800000 | 46200000 | 4514000  | 6583400  | 10700000 |
| 8177200  | 14900000 | 2402300  | 3695700  | 5544500  |
| 6067900  | 4415000  | 2209600  | 3189900  | 1670800  |
| 12700000 | 19300000 | 3088800  | 5178600  | 3266600  |
| 10300000 | 10800000 | 758050   | 0        | 3608500  |
| 5556200  | 5538100  | 2837200  | 3935200  | 1718800  |
| 0        | 0        | 1966200  | 0        | 0        |
| 4099900  | 13900000 | 2251900  | 2280200  | 1982400  |
| 4670800  | 17800000 | 2973200  | 1618400  | 5513000  |
| 1310800  | 1594200  | 8223300  | 3020500  | 1025800  |

|          |          |          |          |          |
|----------|----------|----------|----------|----------|
| 5066800  | 24100000 | 16400000 | 16200000 | 8748400  |
| 9306200  | 9102700  | 9674600  | 9208500  | 4043400  |
| 7722900  | 19400000 | 15900000 | 14100000 | 7004200  |
| 3139600  | 3879600  | 2306700  | 2945200  | 1838500  |
| 36700000 | 41200000 | 22300000 | 17500000 | 12200000 |
| 29800000 | 1.10E+07 | 6061400  | 6072600  | 3562100  |
| 9497100  | 12300000 | 6983900  | 7896300  | 4839400  |
| 0        | 4462000  | 1898200  | 0        | 5500000  |
| 0        | 0        | 2804400  | 0        | 0        |
| 5006700  | 3865200  | 617230   | 580090   | 550970   |
| 2083900  | 0        | 0        | 8206800  | 0        |
| 10200000 | 10900000 | 6546400  | 7636800  | 2384100  |
| 7391300  | 19500000 | 11700000 | 1.30E+07 | 9239700  |
| 0        | 0        | 0        | 0        | 0        |
| 8333900  | 1607700  | 0        | 8459600  | 3342500  |
| 0        | 0        | 0        | 6601800  | 1737200  |
| 5761800  | 0        | 12900000 | 12900000 | 4237800  |
| 578010   | 3894000  | 0        | 1517600  | 4902000  |
| 26900000 | 28700000 | 8647600  | 10300000 | 7157600  |
| 0        | 0        | 0        | 0        | 0        |
| 10400000 | 15300000 | 11400000 | 8569100  | 5123400  |
| 0        | 0        | 0        | 2197500  | 558490   |
| 906290   | 6265100  | 4699700  | 767580   | 726330   |
| 0        | 0        | 0        | 0        | 0        |
| 8657600  | 8847600  | 6672000  | 3133300  | 1636800  |
| 3574600  | 6272300  | 3910600  | 5338200  | 2344100  |
| 4243600  | 6003800  | 2123300  | 3595800  | 2248900  |
| 1946300  | 4090400  | 5996700  | 3186700  | 235940   |
| 3073600  | 2911800  | 1853200  | 0        | 1712000  |
| 5481100  | 11400000 | 3954000  | 2749400  | 4765100  |
| 17400000 | 12300000 | 7868300  | 7764000  | 6838000  |
| 782600   | 1436200  | 0        | 0        | 509270   |
| 0        | 0        | 0        | 0        | 0        |
| 0        | 0        | 0        | 0        | 0        |
| 7569500  | 7629100  | 1918800  | 0        | 0        |
| 0        | 0        | 0        | 0        | 0        |
| 2203200  | 0        | 3552200  | 593720   | 4196700  |
| 0        | 0        | 0        | 0        | 0        |
| 0        | 0        | 0        | 0        | 0        |
| 1768300  | 0        | 0        | 0        | 1910200  |
| 0        | 0        | 0        | 0        | 0        |
| 8749700  | 13100000 | 9876100  | 5158800  | 3594200  |
| 9088100  | 11500000 | 5307600  | 1665300  | 1193300  |
| 7524300  | 1.80E+07 | 7452100  | 6322800  | 3816800  |
| 0        | 0        | 0        | 0        | 0        |
| 3397400  | 7373900  | 2788900  | 5265200  | 2004700  |
| 0        | 5335200  | 0        | 0        | 0        |

|          |          |          |          |          |
|----------|----------|----------|----------|----------|
| 9173600  | 15800000 | 76200000 | 8133800  | 4364800  |
| 1476800  | 1293200  | 1079600  | 1364300  | 705820   |
| 2234100  | 1690500  | 874330   | 1416400  | 850440   |
| 4700200  | 9588700  | 4795200  | 0        | 1616600  |
| 2927200  | 6130100  | 4145700  | 2945200  | 1495900  |
| 3202000  | 4121900  | 5522900  | 5573900  | 2412200  |
| 31100000 | 0        | 13100000 | 17700000 | 8851500  |
| 0        | 9999300  | 6083700  | 8093200  | 4276500  |
| 0        | 0        | 0        | 0        | 0        |
| 1208900  | 961570   | 902810   | 1038600  | 631310   |
| 2399000  | 8722700  | 0        | 1748300  | 1612700  |
| 7278500  | 13500000 | 0        | 0        | 0        |
| 2481400  | 0        | 1849300  | 2906800  | 0        |
| 0        | 0        | 0        | 0        | 0        |
| 18600000 | 27700000 | 9743300  | 7603700  | 6995400  |
| 0        | 0        | 0        | 8485700  | 5982600  |
| 9550300  | 12500000 | 6544800  | 4145500  | 2275700  |
| 10800000 | 27300000 | 2243000  | 9030100  | 4678900  |
| 3901600  | 0        | 3168200  | 4636900  | 0        |
| 0        | 0        | 0        | 0        | 0        |
| 1.80E+07 | 10700000 | 15300000 | 10400000 | 4393900  |
| 0        | 0        | 0        | 0        | 0        |
| 1894400  | 2438800  | 2798600  | 0        | 0        |
| 5084300  | 7280400  | 7601000  | 8127500  | 5578200  |
| 0        | 0        | 0        | 0        | 0        |
| 4722000  | 6463500  | 7871400  | 7543000  | 3239600  |
| 4881300  | 10500000 | 2861200  | 6339300  | 6892700  |
| 9853000  | 58900000 | 28800000 | 7024600  | 3691000  |
| 0        | 0        | 0        | 0        | 1481900  |
| 13700000 | 16400000 | 0        | 0        | 4748200  |
| 234460   | 766060   | 415220   | 364930   | 636270   |
| 3463300  | 9788900  | 8047900  | 3052400  | 3339500  |
| 7151100  | 5664800  | 13300000 | 9990800  | 7688900  |
| 0        | 0        | 0        | 0        | 0        |
| 8308200  | 0        | 2158900  | 0        | 2162900  |
| 0        | 1059900  | 5475600  | 3939900  | 6298900  |
| 81800000 | 95900000 | 53900000 | 7921700  | 29100000 |
| 0        | 8587000  | 0        | 0        | 0        |
| 0        | 0        | 0        | 0        | 0        |
| 21700000 | 28100000 | 23700000 | 19800000 | 11400000 |
| 0        | 0        | 0        | 0        | 0        |
| 17400000 | 24600000 | 0        | 3096500  | 2749500  |
| 18500000 | 4.10E+07 | 0        | 15200000 | 21100000 |
| 4524500  | 8574000  | 10900000 | 4604300  | 7144800  |
| 0        | 11800000 | 12500000 | 8857300  | 5534700  |
| 3511200  | 5070900  | 3761300  | 3539800  | 3058800  |
| 1588600  | 6417100  | 1504000  | 1823300  | 0        |

|          |          |          |          |          |
|----------|----------|----------|----------|----------|
| 0        | 0        | 0        | 0        | 0        |
| 0        | 0        | 0        | 0        | 0        |
| 12500000 | 12300000 | 0        | 2345300  | 1442500  |
| 465410   | 2249000  | 0        | 0        | 319870   |
| 10400000 | 12700000 | 4071400  | 6393800  | 6058100  |
| 4844500  | 17400000 | 3854800  | 2390400  | 5356800  |
| 11300000 | 3330400  | 572830   | 4407200  | 4968100  |
| 0        | 0        | 32600000 | 931230   | 0        |
| 0        | 0        | 0        | 8313900  | 0        |
| 0        | 3363600  | 0        | 735140   | 2827600  |
| 18400000 | 8939000  | 21400000 | 7259900  | 5159000  |
| 2787300  | 0        | 0        | 0        | 0        |
| 0        | 0        | 0        | 0        | 0        |
| 0        | 0        | 0        | 0        | 0        |
| 0        | 0        | 0        | 0        | 0        |
| 2670900  | 0        | 7811500  | 11900000 | 0        |
| 0        | 3195500  | 0        | 0        | 0        |
| 7832500  | 8536900  | 15700000 | 4819600  | 5924400  |
| 3989400  | 0        | 0        | 2379800  | 0        |
| 1.70E+07 | 22700000 | 6405300  | 9890100  | 2274000  |
| 0        | 0        | 0        | 0        | 0        |
| 0        | 6919000  | 5849400  | 8072100  | 3451700  |
| 0        | 6652600  | 0        | 0        | 1519400  |
| 10900000 | 13600000 | 4397800  | 5895300  | 6747700  |
| 9645300  | 9803300  | 2727300  | 4070900  | 1375600  |
| 0        | 0        | 0        | 0        | 0        |
| 22500000 | 24600000 | 17700000 | 12800000 | 13100000 |
| 3347000  | 4026500  | 2781500  | 2084700  | 2495000  |
| 27700000 | 22300000 | 18500000 | 8343700  | 7138000  |
| 8024600  | 2.70E+07 | 25800000 | 14700000 | 1.20E+07 |
| 0        | 0        | 0        | 0        | 0        |
| 0        | 0        | 2912600  | 1210800  | 3209700  |
| 13800000 | 1.70E+07 | 2330300  | 0        | 0        |
| 10600000 | 39900000 | 6110800  | 7069500  | 4895300  |
| 10200000 | 0        | 9744800  | 926950   | 815050   |
| 0        | 2888400  | 4612900  | 0        | 2415200  |
| 0        | 5541600  | 2861200  | 2946400  | 6892700  |
| 0        | 1650600  | 0        | 1616000  | 0        |
| 0        | 0        | 0        | 0        | 0        |
| 2366700  | 0        | 700490   | 2045400  | 0        |
| 494610   | 4723300  | 1334900  | 1432100  | 541630   |
| 6831300  | 11700000 | 7357700  | 6714800  | 2712900  |
| 6982100  | 1756400  | 0        | 0        | 178360   |
| 18500000 | 2.60E+07 | 18200000 | 24300000 | 16300000 |
| 8146200  | 4773400  | 3816200  | 0        | 2808100  |
| 0        | 0        | 0        | 0        | 0        |
| 2876800  | 0        | 3101500  | 2162300  | 0        |

|          |          |          |          |         |
|----------|----------|----------|----------|---------|
| 0        | 0        | 1794000  | 0        | 0       |
| 0        | 0        | 2898300  | 3033700  | 2042600 |
| 0        | 0        | 0        | 0        | 0       |
| 0        | 1220700  | 0        | 0        | 0       |
| 13900000 | 9319600  | 7169400  | 6137100  | 3246000 |
| 2016100  | 2489600  | 2048800  | 1987300  | 1658300 |
| 17700000 | 13300000 | 7886500  | 7651500  | 1430600 |
| 1627700  | 8842400  | 0        | 2627300  | 1846200 |
| 0        | 0        | 0        | 0        | 0       |
| 0        | 0        | 0        | 0        | 0       |
| 6564900  | 0        | 0        | 0        | 0       |
| 0        | 0        | 0        | 0        | 0       |
| 5991900  | 7910500  | 4412000  | 3226400  | 1718700 |
| 0        | 0        | 0        | 0        | 0       |
| 0        | 0        | 1228000  | 0        | 1165000 |
| 4889000  | 5211300  | 990810   | 2300300  | 0       |
| 0        | 0        | 0        | 0        | 0       |
| 0        | 339960   | 0        | 0        | 0       |
| 189000   | 6194900  | 7120500  | 5557500  | 1872000 |
| 1666400  | 2310600  | 1617800  | 0        | 838750  |
| 16200000 | 7662400  | 0        | 5532400  | 5307500 |
| 0        | 0        | 0        | 0        | 0       |
| 56400000 | 7683200  | 1726200  | 6048700  | 2523000 |
| 0        | 4784600  | 0        | 1725200  | 2978900 |
| 0        | 0        | 0        | 0        | 0       |
| 3936200  | 3703000  | 2653300  | 2644700  | 0       |
| 0        | 0        | 154490   | 0        | 0       |
| 0        | 0        | 4870300  | 0        | 993700  |
| 0        | 0        | 1649200  | 0        | 0       |
| 5656500  | 3974000  | 3360700  | 4548500  | 0       |
| 2134400  | 0        | 4882500  | 6053300  | 3288900 |
| 0        | 0        | 0        | 4933200  | 0       |
| 0        | 0        | 0        | 9722500  | 7838700 |
| 16700000 | 33700000 | 6549100  | 12300000 | 4279300 |
| 0        | 0        | 0        | 0        | 0       |
| 0        | 3605300  | 0        | 0        | 0       |
| 0        | 0        | 2389800  | 2144700  | 0       |
| 381920   | 0        | 0        | 414420   | 0       |
| 0        | 7493200  | 4339100  | 5855600  | 2993900 |
| 0        | 0        | 1691500  | 1182800  | 0       |
| 0        | 0        | 0        | 0        | 0       |
| 12300000 | 18200000 | 13100000 | 1.20E+07 | 7494500 |
| 1.10E+07 | 19200000 | 0        | 0        | 0       |
| 0        | 0        | 0        | 0        | 0       |
| 10900000 | 11200000 | 10100000 | 9209100  | 4622400 |
| 1395000  | 525250   | 1155300  | 982790   | 1293500 |
| 0        | 0        | 0        | 0        | 0       |



|          |          |          |          |         |
|----------|----------|----------|----------|---------|
| 0        | 0        | 0        | 0        | 0       |
| 0        | 0        | 0        | 0        | 0       |
| 0        | 0        | 0        | 0        | 0       |
| 498740   | 0        | 0        | 0        | 0       |
| 0        | 4263000  | 0        | 2777000  | 1942200 |
| 5397500  | 5060600  | 3367700  | 4630400  | 0       |
| 12900000 | 12400000 | 9040100  | 7265000  | 5980100 |
| 1127200  | 1531600  | 0        | 0        | 0       |
| 3541600  | 4044800  | 0        | 0        | 0       |
| 0        | 0        | 4775900  | 4722600  | 0       |
| 3506400  | 5830500  | 1612600  | 2281100  | 4243200 |
| 0        | 961160   | 4119800  | 2807200  | 719850  |
| 0        | 12700000 | 7861600  | 7184000  | 5731400 |
| 0        | 0        | 20100000 | 2717600  | 0       |
| 0        | 0        | 950550   | 2574600  | 1421700 |
| 5302400  | 11200000 | 1633800  | 1254400  | 1591100 |
| 0        | 0        | 1323000  | 2189900  | 0       |
| 0        | 0        | 0        | 0        | 0       |
| 0        | 0        | 0        | 0        | 0       |
| 577790   | 326850   | 1811600  | 1597500  | 607340  |
| 0        | 0        | 0        | 0        | 0       |
| 0        | 0        | 0        | 0        | 0       |
| 1055900  | 1339200  | 0        | 424690   | 0       |
| 0        | 0        | 4328100  | 2126700  | 0       |
| 21600000 | 18100000 | 0        | 12200000 | 8018900 |
| 0        | 0        | 2760100  | 3713900  | 5286100 |
| 8639100  | 10100000 | 0        | 5314600  | 0       |
| 0        | 4837300  | 1703900  | 0        | 0       |
| 2393700  | 0        | 0        | 0        | 0       |
| 1.30E+07 | 12200000 | 2815400  | 5785900  | 4673500 |
| 0        | 10200000 | 9170100  | 8020600  | 0       |
| 0        | 0        | 0        | 0        | 0       |
| 0        | 1489200  | 0        | 0        | 0       |
| 0        | 0        | 0        | 0        | 0       |
| 3575900  | 0        | 5543400  | 4091600  | 4016700 |
| 8827700  | 8313400  | 3649100  | 3290700  | 4916600 |
| 8674800  | 7425900  | 2290800  | 231900   | 5365500 |
| 2929000  | 0        | 5286400  | 4762800  | 4037200 |
| 0        | 0        | 0        | 0        | 0       |
| 3377700  | 2855400  | 1873700  | 2581600  | 1508800 |
| 0        | 0        | 0        | 0        | 2338800 |
| 1483100  | 9547000  | 4072600  | 2772600  | 1836800 |
| 0        | 0        | 0        | 0        | 0       |
| 0        | 0        | 0        | 0        | 0       |
| 3641600  | 3885000  | 0        | 0        | 585330  |
| 0        | 0        | 4766200  | 0        | 0       |
| 0        | 0        | 0        | 0        | 0       |

|          |          |         |          |         |
|----------|----------|---------|----------|---------|
| 0        | 0        | 0       | 0        | 0       |
| 0        | 0        | 0       | 0        | 0       |
| 0        | 0        | 492440  | 0        | 0       |
| 0        | 0        | 0       | 0        | 0       |
| 3.80E+07 | 11900000 | 4839100 | 11500000 | 7292400 |
| 0        | 0        | 0       | 0        | 0       |
| 0        | 3655100  | 2695300 | 0        | 3377300 |
| 2880100  | 0        | 1281000 | 1747100  | 3169300 |
| 0        | 0        | 0       | 0        | 0       |
| 5213100  | 6688900  | 3072100 | 0        | 1636300 |
| 0        | 0        | 0       | 0        | 0       |
| 0        | 0        | 0       | 0        | 0       |
| 0        | 0        | 0       | 0        | 0       |
| 0        | 0        | 4468900 | 0        | 0       |
| 0        | 7504000  | 3553600 | 3563100  | 2544900 |
| 0        | 4299500  | 0       | 2111200  | 2313800 |
| 1444900  | 0        | 0       | 0        | 0       |
| 0        | 4217100  | 0       | 0        | 0       |
| 0        | 2069800  | 7895300 | 5791100  | 0       |
| 0        | 0        | 0       | 0        | 0       |
| 0        | 7838200  | 8620500 | 3153400  | 0       |
| 0        | 0        | 1638200 | 1964400  | 1894100 |
| 0        | 0        | 0       | 0        | 0       |
| 0        | 2337300  | 0       | 888300   | 0       |
| 0        | 0        | 0       | 0        | 0       |
| 0        | 0        | 0       | 0        | 0       |
| 0        | 0        | 0       | 0        | 0       |
| 0        | 0        | 1315000 | 0        | 0       |
| 0        | 0        | 0       | 9601400  | 0       |
| 0        | 0        | 0       | 0        | 0       |
| 0        | 0        | 0       | 0        | 0       |
| 0        | 0        | 0       | 0        | 1033700 |
| 2071500  | 2073600  | 0       | 0        | 426560  |
| 0        | 0        | 0       | 0        | 0       |
| 5426400  | 0        | 2411000 | 0        | 0       |
| 1995400  | 3368700  | 1936000 | 2536200  | 2301000 |
| 0        | 0        | 0       | 0        | 0       |
| 0        | 0        | 0       | 0        | 0       |
| 0        | 0        | 0       | 593350   | 0       |
| 0        | 0        | 0       | 0        | 0       |
| 0        | 0        | 0       | 2570000  | 1736400 |
| 0        | 0        | 0       | 0        | 0       |
| 0        | 10600000 | 5685400 | 4661900  | 3298900 |
| 4569600  | 0        | 4608600 | 4184700  | 2575200 |
| 3407400  | 6463700  | 0       | 1931700  | 0       |
| 5284600  | 2320700  | 5822400 | 4709300  | 0       |
| 0        | 1.63E+08 | 3392700 | 2375100  | 3820100 |



|          |          |          |          |          |
|----------|----------|----------|----------|----------|
| 0        | 0        | 0        | 0        | 0        |
| 0        | 0        | 0        | 0        | 0        |
| 69100000 | 80600000 | 52100000 | 0        | 25700000 |
| 2623100  | 5032800  | 1676100  | 0        | 1204200  |
| 0        | 0        | 0        | 0        | 0        |
| 0        | 3584600  | 0        | 0        | 0        |
| 0        | 0        | 0        | 0        | 0        |
| 0        | 0        | 0        | 0        | 0        |
| 29600000 | 36800000 | 29600000 | 20300000 | 16800000 |
| 0        | 0        | 0        | 0        | 0        |
| 0        | 0        | 0        | 0        | 0        |
| 0        | 0        | 0        | 0        | 0        |
| 0        | 0        | 0        | 0        | 0        |
| 0        | 0        | 68300000 | 59300000 | 0        |
| 0        | 0        | 0        | 0        | 0        |
| 0        | 0        | 0        | 0        | 0        |
| 0        | 0        | 0        | 0        | 0        |
| 0        | 0        | 0        | 0        | 0        |
| 85100000 | 89100000 | 71300000 | 80700000 | 46300000 |
| 0        | 0        | 0        | 0        | 0        |
| 0        | 0        | 0        | 0        | 0        |
| 22500000 | 2.60E+07 | 2644400  | 2199400  | 5178400  |
| 0        | 0        | 0        | 0        | 0        |
| 0        | 0        | 0        | 0        | 0        |
| 1.22E+09 | 1.33E+09 | NA       | NA       | NA       |
| 1.78E+08 | 3.55E+08 | NA       | NA       | NA       |
| 2.09E+10 | 2.82E+10 | NA       | NA       | NA       |
| 5.77E+08 | 5.82E+08 | NA       | NA       | NA       |
| 6.62E+08 | 7.85E+08 | NA       | NA       | NA       |
| 1.75E+09 | 2.21E+09 | NA       | NA       | NA       |
| 4.21E+08 | 4.74E+08 | NA       | NA       | NA       |
| 8.52E+08 | 1.11E+09 | NA       | NA       | NA       |
| 1.92E+08 | 2.34E+08 | NA       | NA       | NA       |
| 2.98E+08 | 3.44E+08 | NA       | NA       | NA       |
| 3117000  | 0        | NA       | NA       | NA       |
| 2.92E+08 | 3.99E+08 | NA       | NA       | NA       |
| 2.65E+08 | 2.81E+08 | NA       | NA       | NA       |
| 4.23E+08 | 2.91E+08 | NA       | NA       | NA       |
| 82600000 | 1.31E+08 | NA       | NA       | NA       |
| 8.00E+07 | 1.12E+08 | NA       | NA       | NA       |
| 2.39E+08 | 4.03E+08 | NA       | NA       | NA       |
| 1.02E+08 | 1.36E+08 | NA       | NA       | NA       |
| 3.03E+08 | 3.20E+08 | NA       | NA       | NA       |
| 34800000 | 9.20E+07 | NA       | NA       | NA       |
| 72700000 | 62800000 | NA       | NA       | NA       |
| 1.41E+08 | 1.89E+08 | NA       | NA       | NA       |
| 1.45E+08 | 1.43E+08 | NA       | NA       | NA       |

|          |          |    |    |    |
|----------|----------|----|----|----|
| 84600000 | 22700000 | NA | NA | NA |
| 1.65E+08 | 2.24E+08 | NA | NA | NA |
| 84700000 | 1.17E+08 | NA | NA | NA |
| 21800000 | 11900000 | NA | NA | NA |
| 0        | 1.16E+08 | NA | NA | NA |
| 36100000 | 54100000 | NA | NA | NA |
| 13800000 | 28100000 | NA | NA | NA |
| 5.10E+07 | 83600000 | NA | NA | NA |
| 72800000 | 62500000 | NA | NA | NA |
| 2.30E+08 | 2.93E+08 | NA | NA | NA |
| 0        | 37300000 | NA | NA | NA |
| 41200000 | 71200000 | NA | NA | NA |
| 1.01E+08 | 93800000 | NA | NA | NA |
| 3.80E+07 | 40300000 | NA | NA | NA |
| 0        | 0        | NA | NA | NA |
| 24700000 | 21600000 | NA | NA | NA |
| 2.80E+07 | 23400000 | NA | NA | NA |
| 42100000 | 40800000 | NA | NA | NA |
| 24400000 | 55600000 | NA | NA | NA |
| 0        | 17700000 | NA | NA | NA |
| 29600000 | 38200000 | NA | NA | NA |
| 43300000 | 1.13E+08 | NA | NA | NA |
| 56100000 | 93300000 | NA | NA | NA |
| 20800000 | 33300000 | NA | NA | NA |
| 42200000 | 31900000 | NA | NA | NA |
| 48800000 | 39200000 | NA | NA | NA |
| 13800000 | 39200000 | NA | NA | NA |
| 34200000 | 28300000 | NA | NA | NA |
| 24400000 | 13600000 | NA | NA | NA |
| 4637100  | 20400000 | NA | NA | NA |
| 1364400  | 2980200  | NA | NA | NA |
| 48200000 | 47100000 | NA | NA | NA |
| 0        | 0        | NA | NA | NA |
| 0        | 0        | NA | NA | NA |
| 0        | 1.70E+07 | NA | NA | NA |
| 6014600  | 7538800  | NA | NA | NA |
| 13700000 | 18700000 | NA | NA | NA |
| 0        | 0        | NA | NA | NA |
| 2693900  | 5493500  | NA | NA | NA |
| 12300000 | 14600000 | NA | NA | NA |
| 0        | 0        | NA | NA | NA |
| 0        | 8662500  | NA | NA | NA |
| 18300000 | 4722400  | NA | NA | NA |
| 1.77E+08 | 2.25E+08 | NA | NA | NA |
| 3602000  | 0        | NA | NA | NA |
| 31300000 | 264940   | NA | NA | NA |
| 0        | 2506200  | NA | NA | NA |

|          |          |    |    |
|----------|----------|----|----|
| 0        | 0        | NA | NA |
| 0        | 0        | NA | NA |
| 1955100  | 1668100  | NA | NA |
| 16400000 | 10200000 | NA | NA |
| 9361300  | 13700000 | NA | NA |
| 2982200  | 86200000 | NA | NA |
| 14600000 | 0        | NA | NA |
| 1780800  | 5380200  | NA | NA |
| 7189300  | 14300000 | NA | NA |
| 3952300  | 27100000 | NA | NA |
| 13200000 | 4782500  | NA | NA |
| 0        | 0        | NA | NA |
| 4672500  | 0        | NA | NA |
| 9767400  | 15300000 | NA | NA |
| 24300000 | 21800000 | NA | NA |
| 3757000  | 0        | NA | NA |
| 5298700  | 4454300  | NA | NA |
| 11400000 | 6991800  | NA | NA |
| 6564100  | 10100000 | NA | NA |
| 3965200  | 5150800  | NA | NA |
| 5426700  | 15300000 | NA | NA |
| 0        | 0        | NA | NA |
| 0        | 0        | NA | NA |
| 0        | 0        | NA | NA |
| 0        | 0        | NA | NA |
| 10100000 | 15600000 | NA | NA |
| 5739300  | 4524400  | NA | NA |
| 14100000 | 57100000 | NA | NA |
| 1.28E+08 | 0        | NA | NA |
| 6575600  | 0        | NA | NA |
| 12100000 | 46800000 | NA | NA |
| 4687500  | 6991200  | NA | NA |
| 6565200  | 35200000 | NA | NA |
| 23600000 | 2.10E+07 | NA | NA |
| 0        | 11900000 | NA | NA |
| 0        | 8973200  | NA | NA |
| 15700000 | 8229700  | NA | NA |
| 0        | 0        | NA | NA |
| 17600000 | 3492600  | NA | NA |
| 0        | 1352300  | NA | NA |
| 16400000 | 0        | NA | NA |
| 0        | 0        | NA | NA |
| 3011900  | 0        | NA | NA |
| 18400000 | 17200000 | NA | NA |
| 4965000  | 0        | NA | NA |
| 0        | 0        | NA | NA |
| 0        | 0        | NA | NA |

|          |          |    |    |    |
|----------|----------|----|----|----|
| 44600000 | 2.09E+08 | NA | NA | NA |
| 0        | 0        | NA | NA | NA |
| 4750600  | 1640300  | NA | NA | NA |
| 33400000 | 1.90E+07 | NA | NA | NA |
| 5221000  | 8280800  | NA | NA | NA |
| 750550   | 818330   | NA | NA | NA |
| 0        | 920430   | NA | NA | NA |
| 6236000  | 12800000 | NA | NA | NA |
| 0        | 4109100  | NA | NA | NA |
| 0        | 13800000 | NA | NA | NA |
| 38100000 | 31800000 | NA | NA | NA |
| 19800000 | 31700000 | NA | NA | NA |
| 1127100  | 761430   | NA | NA | NA |
| 1987300  | 2272600  | NA | NA | NA |
| 0        | 0        | NA | NA | NA |
| 0        | 0        | NA | NA | NA |
| 8980600  | 11900000 | NA | NA | NA |
| 1214000  | 5764100  | NA | NA | NA |
| 3717800  | 5727700  | NA | NA | NA |
| 0        | 0        | NA | NA | NA |
| 0        | 0        | NA | NA | NA |
| 0        | 0        | NA | NA | NA |
| 0        | 0        | NA | NA | NA |
| 1.52E+08 | 2.64E+08 | NA | NA | NA |
| 0        | 0        | NA | NA | NA |
| 0        | 8299100  | NA | NA | NA |
| 0        | 0        | NA | NA | NA |
| 14600000 | 13200000 | NA | NA | NA |
| 3679600  | 0        | NA | NA | NA |
| 0        | 0        | NA | NA | NA |
| 4111400  | 4493900  | NA | NA | NA |
| 3941200  | 5392100  | NA | NA | NA |
| 3342400  | 0        | NA | NA | NA |
| 0        | 0        | NA | NA | NA |
| 635440   | 793560   | NA | NA | NA |
| 3116600  | 0        | NA | NA | NA |
| 18700000 | 21100000 | NA | NA | NA |
| 0        | 4102200  | NA | NA | NA |
| 0        | 0        | NA | NA | NA |
| 3026700  | 8696300  | NA | NA | NA |
| 35400000 | 65500000 | NA | NA | NA |
| 2924100  | 1793000  | NA | NA | NA |
| 0        | 0        | NA | NA | NA |
| 0        | 0        | NA | NA | NA |
| 0        | 0        | NA | NA | NA |
| 0        | 8713900  | NA | NA | NA |
| 419940   | 5306000  | NA | NA | NA |

|          |             |    |    |
|----------|-------------|----|----|
| 8958900  | 0 NA        | NA | NA |
| 2543100  | 0 NA        | NA | NA |
| 3362600  | 0 NA        | NA | NA |
| 0        | 0 NA        | NA | NA |
| 0        | 0 NA        | NA | NA |
| 0        | 4875400 NA  | NA | NA |
| 265980   | 381020 NA   | NA | NA |
| 1217500  | 0 NA        | NA | NA |
| 613410   | 1143300 NA  | NA | NA |
| 3755900  | 0 NA        | NA | NA |
| 0        | 0 NA        | NA | NA |
| 0        | 0 NA        | NA | NA |
| 0        | 4809000 NA  | NA | NA |
| 7673100  | 6766700 NA  | NA | NA |
| 0        | 0 NA        | NA | NA |
| 2621000  | 3445100 NA  | NA | NA |
| 0        | 0 NA        | NA | NA |
| 0        | 0 NA        | NA | NA |
| 0        | 3935500 NA  | NA | NA |
| 3717100  | 3692200 NA  | NA | NA |
| 629970   | 715020 NA   | NA | NA |
| 0        | 0 NA        | NA | NA |
| 32300000 | 23200000 NA | NA | NA |
| 8824500  | 5049200 NA  | NA | NA |
| 0        | 0 NA        | NA | NA |
| 14600000 | 5481800 NA  | NA | NA |
| 0        | 2308900 NA  | NA | NA |
| 0        | 0 NA        | NA | NA |
| 0        | 0 NA        | NA | NA |
| 3051600  | 0 NA        | NA | NA |
| 0        | 0 NA        | NA | NA |
| 4837800  | 7724200 NA  | NA | NA |
| 0        | 0 NA        | NA | NA |
| 2422700  | 0 NA        | NA | NA |
| 0        | 1585500 NA  | NA | NA |
| 4752200  | 3611300 NA  | NA | NA |
| 0        | 64200000 NA | NA | NA |
| 0        | 0 NA        | NA | NA |
| 0        | 0 NA        | NA | NA |
| 0        | 0 NA        | NA | NA |
| 0        | 0 NA        | NA | NA |
| 0        | 0 NA        | NA | NA |
| 0        | 0 NA        | NA | NA |
| 0        | 8633700 NA  | NA | NA |
| 0        | 0 NA        | NA | NA |
| 0        | 390480 NA   | NA | NA |
| 0        | 3546600 NA  | NA | NA |



|          |          |    |    |
|----------|----------|----|----|
| 5556800  | 8611400  | NA | NA |
| 0        | 3210600  | NA | NA |
| 0        | 3479200  | NA | NA |
| 0        | 0        | NA | NA |
| 751580   | 1835500  | NA | NA |
| 0        | 380250   | NA | NA |
| 0        | 0        | NA | NA |
| 0        | 0        | NA | NA |
| 0        | 3198500  | NA | NA |
| 4611400  | 0        | NA | NA |
| 0        | 0        | NA | NA |
| 2699000  | 3785300  | NA | NA |
| 1145600  | 1811900  | NA | NA |
| 1.90E+07 | 23200000 | NA | NA |
| 0        | 5577500  | NA | NA |
| 0        | 3387000  | NA | NA |
| 332650   | 0        | NA | NA |
| 2810200  | 3991100  | NA | NA |
| 0        | 4970200  | NA | NA |
| 8358600  | 8208100  | NA | NA |
| 2822500  | 0        | NA | NA |
| 1651700  | 621830   | NA | NA |
| 0        | 0        | NA | NA |
| 0        | 0        | NA | NA |
| 0        | 0        | NA | NA |
| 0        | 0        | NA | NA |
| 0        | 1115600  | NA | NA |
| 0        | 0        | NA | NA |
| 3282500  | 0        | NA | NA |
| 0        | 0        | NA | NA |
| 0        | 0        | NA | NA |
| 0        | 0        | NA | NA |
| 0        | 0        | NA | NA |
| 6514300  | 0        | NA | NA |
| 0        | 0        | NA | NA |
| 0        | 3310400  | NA | NA |
| 0        | 0        | NA | NA |
| 0        | 0        | NA | NA |
| 0        | 0        | NA | NA |
| 2361900  | 2587600  | NA | NA |
| 0        | 0        | NA | NA |
| 1.29E+08 | 0        | NA | NA |
| 2331600  | 1152500  | NA | NA |
| 2338500  | 0        | NA | NA |
| 0        | 297880   | NA | NA |
| 0        | 0        | NA | NA |
| 0        | 0        | NA | NA |





|    |    |          |          |          |
|----|----|----------|----------|----------|
| NA | NA | 5.33E+08 | 4.60E+08 | 4.93E+08 |
| NA | NA | 4176600  | 5789800  | 1739800  |
| NA | NA | 77300000 | 94100000 | 77100000 |
| NA | NA | 1.89E+08 | 1.77E+08 | 1.39E+08 |
| NA | NA | 1.92E+08 | 1.51E+08 | 1.43E+08 |
| NA | NA | 5.50E+07 | 37700000 | 37600000 |
| NA | NA | 1.59E+08 | 96100000 | 58400000 |
| NA | NA | 78100000 | 55900000 | 46100000 |
| NA | NA | 2.53E+08 | 2.23E+08 | 1.51E+08 |
| NA | NA | 5.40E+07 | 55100000 | 6.60E+07 |
| NA | NA | 1.78E+08 | 1.46E+08 | 87500000 |
| NA | NA | 76600000 | 60400000 | 50400000 |
| NA | NA | 70500000 | 47500000 | 36700000 |
| NA | NA | 1.78E+08 | 1.53E+08 | 1.09E+08 |
| NA | NA | 9576900  | 12800000 | 3418700  |
| NA | NA | 75900000 | 51100000 | 38700000 |
| NA | NA | 28500000 | 14300000 | 16400000 |
| NA | NA | 68800000 | 53800000 | 51900000 |
| NA | NA | 58600000 | 5.30E+07 | 34500000 |
| NA | NA | 83500000 | 27500000 | 5.20E+07 |
| NA | NA | 8641500  | 4186500  | 2749300  |
| NA | NA | 7095500  | 19800000 | 12200000 |
| NA | NA | 59400000 | 42400000 | 34700000 |
| NA | NA | 18300000 | 3.50E+07 | 9410700  |
| NA | NA | 21500000 | 22700000 | 15600000 |
| NA | NA | 12900000 | 22800000 | 10900000 |
| NA | NA | 0        | 0        | 0        |
| NA | NA | 1.14E+08 | 1.25E+08 | 1.03E+08 |
| NA | NA | 30900000 | 25300000 | 17900000 |
| NA | NA | 10100000 | 14100000 | 12200000 |
| NA | NA | 51400000 | 45700000 | 31400000 |
| NA | NA | 15100000 | 0        | 2318700  |
| NA | NA | 11600000 | 11400000 | 8799400  |
| NA | NA | 19500000 | 26100000 | 20100000 |
| NA | NA | 29700000 | 30600000 | 2.50E+07 |
| NA | NA | 43100000 | 14200000 | 15900000 |
| NA | NA | 6231800  | 7917300  | 3054500  |
| NA | NA | 11400000 | 9810700  | 10300000 |
| NA | NA | 7871100  | 5179000  | 5297800  |
| NA | NA | 18800000 | 25900000 | 18500000 |
| NA | NA | 12700000 | 13800000 | 12400000 |
| NA | NA | 0        | 0        | 2.20E+07 |
| NA | NA | 20700000 | 22600000 | 26200000 |
| NA | NA | 0        | 0        | 0        |
| NA | NA | 11700000 | 10700000 | 4944700  |
| NA | NA | 18100000 | 31400000 | 15100000 |
| NA | NA | 16700000 | 16700000 | 1470500  |

|    |    |          |          |          |
|----|----|----------|----------|----------|
| NA | NA | 7723000  | 3477600  | 1750100  |
| NA | NA | 2673800  | 5575500  | 0        |
| NA | NA | 0        | 0        | 0        |
| NA | NA | 12900000 | 13600000 | 8006700  |
| NA | NA | 0        | 6228000  | 5260200  |
| NA | NA | 0        | 0        | 0        |
| NA | NA | 11400000 | 9768400  | 0        |
| NA | NA | 16200000 | 12700000 | 10200000 |
| NA | NA | 21300000 | 6379600  | 4067400  |
| NA | NA | 4569200  | 2043600  | 0        |
| NA | NA | 26500000 | 40600000 | 30400000 |
| NA | NA | 3338900  | 1527900  | 935190   |
| NA | NA | 9445500  | 7950800  | 5936500  |
| NA | NA | 8443000  | 11100000 | 8902600  |
| NA | NA | 16200000 | 1.00E+07 | 7112800  |
| NA | NA | 2358900  | 1406200  | 821510   |
| NA | NA | 5975600  | 14400000 | 10500000 |
| NA | NA | 17500000 | 11300000 | 13400000 |
| NA | NA | 1026000  | 990040   | 1446700  |
| NA | NA | 14700000 | 7550700  | 11100000 |
| NA | NA | 10800000 | 12500000 | 9957900  |
| NA | NA | 4675400  | 21100000 | 13300000 |
| NA | NA | 1519400  | 5397300  | 1250400  |
| NA | NA | 1372600  | 1895000  | 573170   |
| NA | NA | 0        | 0        | 0        |
| NA | NA | 1.96E+08 | 0        | 3384700  |
| NA | NA | 36700000 | 43600000 | 1.90E+07 |
| NA | NA | 6867600  | 10600000 | 0        |
| NA | NA | 3322400  | 3264000  | 2860500  |
| NA | NA | 0        | 0        | 0        |
| NA | NA | 3297600  | 685070   | 1896800  |
| NA | NA | 0        | 0        | 0        |
| NA | NA | 7596800  | 10200000 | 3402400  |
| NA | NA | 2862800  | 0        | 890200   |
| NA | NA | 2174800  | 6473800  | 0        |
| NA | NA | 3878000  | 0        | 1251800  |
| NA | NA | 29600000 | 19700000 | 22800000 |
| NA | NA | 0        | 0        | 0        |
| NA | NA | 1523300  | 3974900  | 2611100  |
| NA | NA | 605680   | 2119800  | 1623300  |
| NA | NA | 2074200  | 6237300  | 2792200  |
| NA | NA | 4604600  | 5851900  | 2400400  |
| NA | NA | 13300000 | 6897500  | 4078900  |
| NA | NA | 0        | 2589600  | 0        |
| NA | NA | 19900000 | 17700000 | 10100000 |
| NA | NA | 9597100  | 11800000 | 8030200  |
| NA | NA | 11500000 | 9902300  | 9371500  |

|    |    |          |          |          |
|----|----|----------|----------|----------|
| NA | NA | 0        | 0        | 0        |
| NA | NA | 5357000  | 5939100  | 6269600  |
| NA | NA | 4923900  | 3679400  | 2662900  |
| NA | NA | 673860   | 603130   | 599990   |
| NA | NA | 0        | 0        | 371110   |
| NA | NA | 15300000 | 20200000 | 11100000 |
| NA | NA | 3875100  | 0        | 1438500  |
| NA | NA | 4507800  | 5585100  | 4004900  |
| NA | NA | 0        | 0        | 0        |
| NA | NA | 0        | 0        | 0        |
| NA | NA | 6605700  | 2498200  | 7297200  |
| NA | NA | 4788000  | 6927200  | 1590400  |
| NA | NA | 5850900  | 286460   | 1065400  |
| NA | NA | 20400000 | 22100000 | 13700000 |
| NA | NA | 16300000 | 21100000 | 4605100  |
| NA | NA | 21400000 | 1.80E+07 | 13100000 |
| NA | NA | 2446900  | 4213100  | 0        |
| NA | NA | 4258800  | 2844900  | 2862100  |
| NA | NA | 0        | 326880   | 312680   |
| NA | NA | 0        | 0        | 25800000 |
| NA | NA | 19200000 | 27100000 | 21200000 |
| NA | NA | 3189800  | 8173100  | 2014500  |
| NA | NA | 0        | 25300000 | 0        |
| NA | NA | 5545000  | 9652300  | 9450800  |
| NA | NA | 7585100  | 4484500  | 2874800  |
| NA | NA | 0        | 0        | 0        |
| NA | NA | 5052200  | 0        | 4150100  |
| NA | NA | 0        | 0        | 0        |
| NA | NA | 5208200  | 9979000  | 0        |
| NA | NA | 4016100  | 3265800  | 2804600  |
| NA | NA | 3981600  | 0        | 0        |
| NA | NA | 1854400  | 2929000  | 1936700  |
| NA | NA | 4511800  | 6815300  | 2813900  |
| NA | NA | 6352800  | 4481100  | 3395800  |
| NA | NA | 0        | 2447800  | 307750   |
| NA | NA | 5224200  | 4102000  | 4391000  |
| NA | NA | 0        | 0        | 0        |
| NA | NA | 7405900  | 6173300  | 0        |
| NA | NA | 2968900  | 1349000  | 3563400  |
| NA | NA | 4661300  | 6246900  | 1977300  |
| NA | NA | 752280   | 0        | 0        |
| NA | NA | 1.30E+07 | 12800000 | 0        |
| NA | NA | 296560   | 486720   | 124590   |
| NA | NA | 3814600  | 3761400  | 2652300  |
| NA | NA | 5779500  | 2512000  | 1963300  |
| NA | NA | 2927800  | 5567800  | 3193100  |
| NA | NA | 1960100  | 2304800  | 1212000  |

|    |    |          |          |          |
|----|----|----------|----------|----------|
| NA | NA | 595120   | 0        | 768840   |
| NA | NA | 3336300  | 0        | 2383700  |
| NA | NA | 0        | 0        | 0        |
| NA | NA | 0        | 0        | 0        |
| NA | NA | 0        | 0        | 0        |
| NA | NA | 0        | 0        | 0        |
| NA | NA | 0        | 0        | 0        |
| NA | NA | 2447600  | 0        | 0        |
| NA | NA | 32800000 | 34100000 | 1.90E+07 |
| NA | NA | 531880   | 1690100  | 1698000  |
| NA | NA | 3982300  | 3658000  | 2182000  |
| NA | NA | 0        | 0        | 0        |
| NA | NA | 5318100  | 5164900  | 0        |
| NA | NA | 1245400  | 0        | 0        |
| NA | NA | 0        | 0        | 0        |
| NA | NA | 5179700  | 3081200  | 2754600  |
| NA | NA | 1614600  | 0        | 0        |
| NA | NA | 2366200  | 0        | 1502300  |
| NA | NA | 5481600  | 7001400  | 4899700  |
| NA | NA | 655290   | 1194800  | 734110   |
| NA | NA | 0        | 2496100  | 0        |
| NA | NA | 0        | 0        | 0        |
| NA | NA | 0        | 0        | 739010   |
| NA | NA | 3201800  | 3297300  | 1883300  |
| NA | NA | 6698200  | 2830600  | 1411500  |
| NA | NA | 3106900  | 0        | 3730300  |
| NA | NA | 0        | 0        | 0        |
| NA | NA | 0        | 2202700  | 0        |
| NA | NA | 499140   | 506260   | 0        |
| NA | NA | 0        | 0        | 0        |
| NA | NA | 0        | 2505900  | 0        |
| NA | NA | 0        | 0        | 0        |
| NA | NA | 0        | 0        | 0        |
| NA | NA | 2155700  | 0        | 1732900  |
| NA | NA | 0        | 0        | 0        |
| NA | NA | 6910800  | 0        | 0        |
| NA | NA | 0        | 0        | 0        |
| NA | NA | 6718900  | 9969400  | 14400000 |
| NA | NA | 0        | 0        | 0        |
| NA | NA | 0        | 0        | 0        |
| NA | NA | 0        | 4501600  | 0        |
| NA | NA | 0        | 1766500  | 2403600  |
| NA | NA | 0        | 0        | 0        |
| NA | NA | 0        | 0        | 0        |
| NA | NA | 1787300  | 2066300  | 0        |
| NA | NA | 3965300  | 2286200  | 0        |
| NA | NA | 9301100  | 8403300  | 0        |

|    |    |          |          |          |
|----|----|----------|----------|----------|
| NA | NA | 0        | 1011600  | 0        |
| NA | NA | 0        | 0        | 0        |
| NA | NA | 0        | 0        | 2969400  |
| NA | NA | 0        | 0        | 0        |
| NA | NA | 2884400  | 2944500  | 0        |
| NA | NA | 2756600  | 2594000  | 0        |
| NA | NA | 4.87E+08 | 4.07E+08 | 2.77E+08 |
| NA | NA | 0        | 0        | 0        |
| NA | NA | 0        | 2225300  | 0        |
| NA | NA | 0        | 0        | 0        |
| NA | NA | 0        | 0        | 0        |
| NA | NA | 3.35E+09 | 9.13E+08 | 2.01E+09 |
| NA | NA | 1809600  | 1715900  | 2189100  |
| NA | NA | 0        | 0        | 0        |
| NA | NA | 0        | 0        | 0        |
| NA | NA | 0        | 0        | 0        |
| NA | NA | 0        | 0        | 0        |
| NA | NA | 0        | 0        | 1906900  |
| NA | NA | 0        | 2516700  | 0        |
| NA | NA | 2410300  | 2639100  | 4333200  |
| NA | NA | 0        | 738470   | 388560   |
| NA | NA | 0        | 0        | 1224200  |
| NA | NA | 3131400  | 3793900  | 1725900  |
| NA | NA | 2728100  | 0        | 0        |
| NA | NA | 238620   | 0        | 0        |
| NA | NA | 0        | 0        | 0        |
| NA | NA | 0        | 0        | 0        |
| NA | NA | 1478300  | 0        | 0        |
| NA | NA | 0        | 0        | 0        |
| NA | NA | 1175000  | 0        | 0        |
| NA | NA | 0        | 0        | 0        |
| NA | NA | 2814200  | 0        | 0        |
| NA | NA | 0        | 0        | 0        |
| NA | NA | 2205900  | 0        | 0        |
| NA | NA | 0        | 0        | 0        |
| NA | NA | 0        | 0        | 0        |
| NA | NA | 0        | 0        | 0        |
| NA | NA | 721640   | 713800   | 387730   |
| NA | NA | 0        | 0        | 0        |
| NA | NA | 0        | 0        | 0        |
| NA | NA | 0        | 1488800  | 0        |
| NA | NA | 2728100  | 0        | 0        |
| NA | NA | 0        | 0        | 0        |
| NA | NA | 0        | 0        | 0        |
| NA | NA | 0        | 0        | 0        |
| NA | NA | 3309400  | 2846600  | 1421300  |
| NA | NA | 0        | 0        | 0        |



|    |    |          |          |          |
|----|----|----------|----------|----------|
| NA | NA | 1635400  | 0        | 0        |
| NA | NA | 8349200  | 0        | 0        |
| NA | NA | 0        | 0        | 0        |
| NA | NA | 0        | 0        | 0        |
| NA | NA | 0        | 0        | 0        |
| NA | NA | 0        | 0        | 0        |
| NA | NA | 0        | 0        | 0        |
| NA | NA | 0        | 0        | 0        |
| NA | NA | 13100000 | 0        | 0        |
| NA | NA | 6392800  | 4183900  | 4012600  |
| NA | NA | 0        | 0        | 0        |
| NA | NA | 0        | 0        | 0        |
| NA | NA | 2401400  | 0        | 0        |
| NA | NA | 0        | 0        | 0        |
| NA | NA | 0        | 0        | 0        |
| NA | NA | 9953200  | 0        | 4837500  |
| NA | NA | 1206600  | 0        | 0        |
| NA | NA | 0        | 0        | 0        |
| NA | NA | 542660   | 612890   | 564120   |
| NA | NA | 0        | 0        | 0        |
| NA | NA | 0        | 0        | 0        |
| NA | NA | 0        | 0        | 0        |
| NA | NA | 0        | 0        | 0        |
| NA | NA | 0        | 0        | 0        |
| NA | NA | 684880   | 4817100  | 0        |
| NA | NA | 0        | 0        | 0        |
| NA | NA | 0        | 0        | 5009300  |
| NA | NA | 0        | 0        | 0        |
| NA | NA | 0        | 0        | 0        |
| NA | NA | 0        | 0        | 0        |
| NA | NA | 21700000 | 0        | 0        |
| NA | NA | 31600000 | 15700000 | 13900000 |
| NA | NA | 0        | 0        | 0        |
| NA | NA | 0        | 0        | 0        |
| NA | NA | 992930   | 0        | 0        |
| NA | NA | 72400000 | 64600000 | 41200000 |
| NA | NA | 0        | 0        | 3920400  |
| NA | NA | 0        | 0        | 0        |
| NA | NA | 0        | 0        | 0        |
| NA | NA | 0        | 0        | 0        |
| NA | NA | 0        | 0        | 0        |
| NA | NA | 9699500  | 9633300  | 7787200  |
| NA | NA | 0        | 0        | 0        |
| NA | NA | 0        | 1632800  | 0        |
| NA | NA | 5760000  | 6982200  | 0        |
| NA | NA | 15400000 | 13800000 | 7750400  |
| NA | NA | 5179700  | 6945500  | 5924400  |

|          |          |          |          |          |
|----------|----------|----------|----------|----------|
| NA       | NA       | 0        | 1874600  | 0        |
| NA       | NA       | 0        | 0        | 0        |
| NA       | NA       | 0        | 0        | 0        |
| NA       | NA       | 0        | 0        | 0        |
| NA       | NA       | 0        | 0        | 0        |
| NA       | NA       | 0        | 0        | 0        |
| NA       | NA       | 0        | 0        | 0        |
| NA       | NA       | 2026300  | 0        | 0        |
| NA       | NA       | 8744700  | 7826000  | 5355500  |
| NA       | NA       | 0        | 0        | 0        |
| NA       | NA       | 0        | 0        | 0        |
| NA       | NA       | 2536300  | 7249300  | 2349600  |
| NA       | NA       | 0        | 12500000 | 6168200  |
| NA       | NA       | 0        | 0        | 0        |
| NA       | NA       | 0        | 0        | 0        |
| NA       | NA       | 1098900  | 1291400  | 4499000  |
| NA       | NA       | 16600000 | 7762400  | 6883700  |
| 49900000 | 61400000 | NA       | NA       | NA       |
| NA       | NA       | 1824000  | 0        | 0        |
| NA       | NA       | 1.50E+07 | 4408200  | 7479200  |
| 1112200  | 0        | NA       | NA       | NA       |
| NA       | NA       | 0        | 0        | 737300   |
|          | 0        | 0        | NA       | NA       |
|          | 0        | 0        | NA       | NA       |
| NA       | NA       | 7128600  | 0        | 0        |
| NA       | NA       | 1306500  | 1574900  | 2397100  |
| 87400000 | 1.34E+08 | NA       | NA       | NA       |
|          | 0        | 15600000 | NA       | NA       |
| 3248000  | 0        | NA       | NA       | NA       |
| NA       | NA       | 0        | 4019900  | 1.60E+07 |
| 1.17E+09 | 1.29E+09 | NA       | NA       | NA       |
| NA       | NA       | 4499000  | 6627200  | 4009100  |
|          | 0        | 0        | NA       | NA       |
| 3.35E+08 | 2.72E+08 | NA       | NA       | NA       |
| NA       | NA       | 9533500  | 8759300  | 9033600  |
| 20700000 | 28800000 | 1.80E+07 | 7662400  | 10400000 |
| NA       | NA       | 18200000 | 27200000 | 16800000 |
| 90200000 | 98700000 | NA       | NA       | NA       |
| 11500000 | 14100000 | NA       | NA       | NA       |
| 4867200  | 86100000 | NA       | NA       | NA       |
| NA       | NA       | 0        | 0        | 0        |
| 8873900  | 8109400  | NA       | NA       | NA       |
|          | 0        | 5301400  | NA       | NA       |
| 7.59E+08 | 8.87E+08 | NA       | NA       | NA       |
| NA       | NA       | 2.80E+07 | 23900000 | 14500000 |
| NA       | NA       | 2170600  | 1377300  | 780970   |
| NA       | NA       | 3603100  | 15800000 | 0        |

|          |          |    |    |    |  |
|----------|----------|----|----|----|--|
| 673820   | 11100000 | NA | NA | NA |  |
| 6090700  | 9680700  | NA | NA | NA |  |
| 55800000 | 71500000 | NA | NA | NA |  |
| 9907900  | 9136800  | NA | NA | NA |  |
| NA       | NA       | 0  | 0  | 0  |  |
